# Supplementary material
Source: publisher figshare collection journal article supplement (https://gsajournals.figshare.com/articles/dataset/_/16586714)

Figure S1

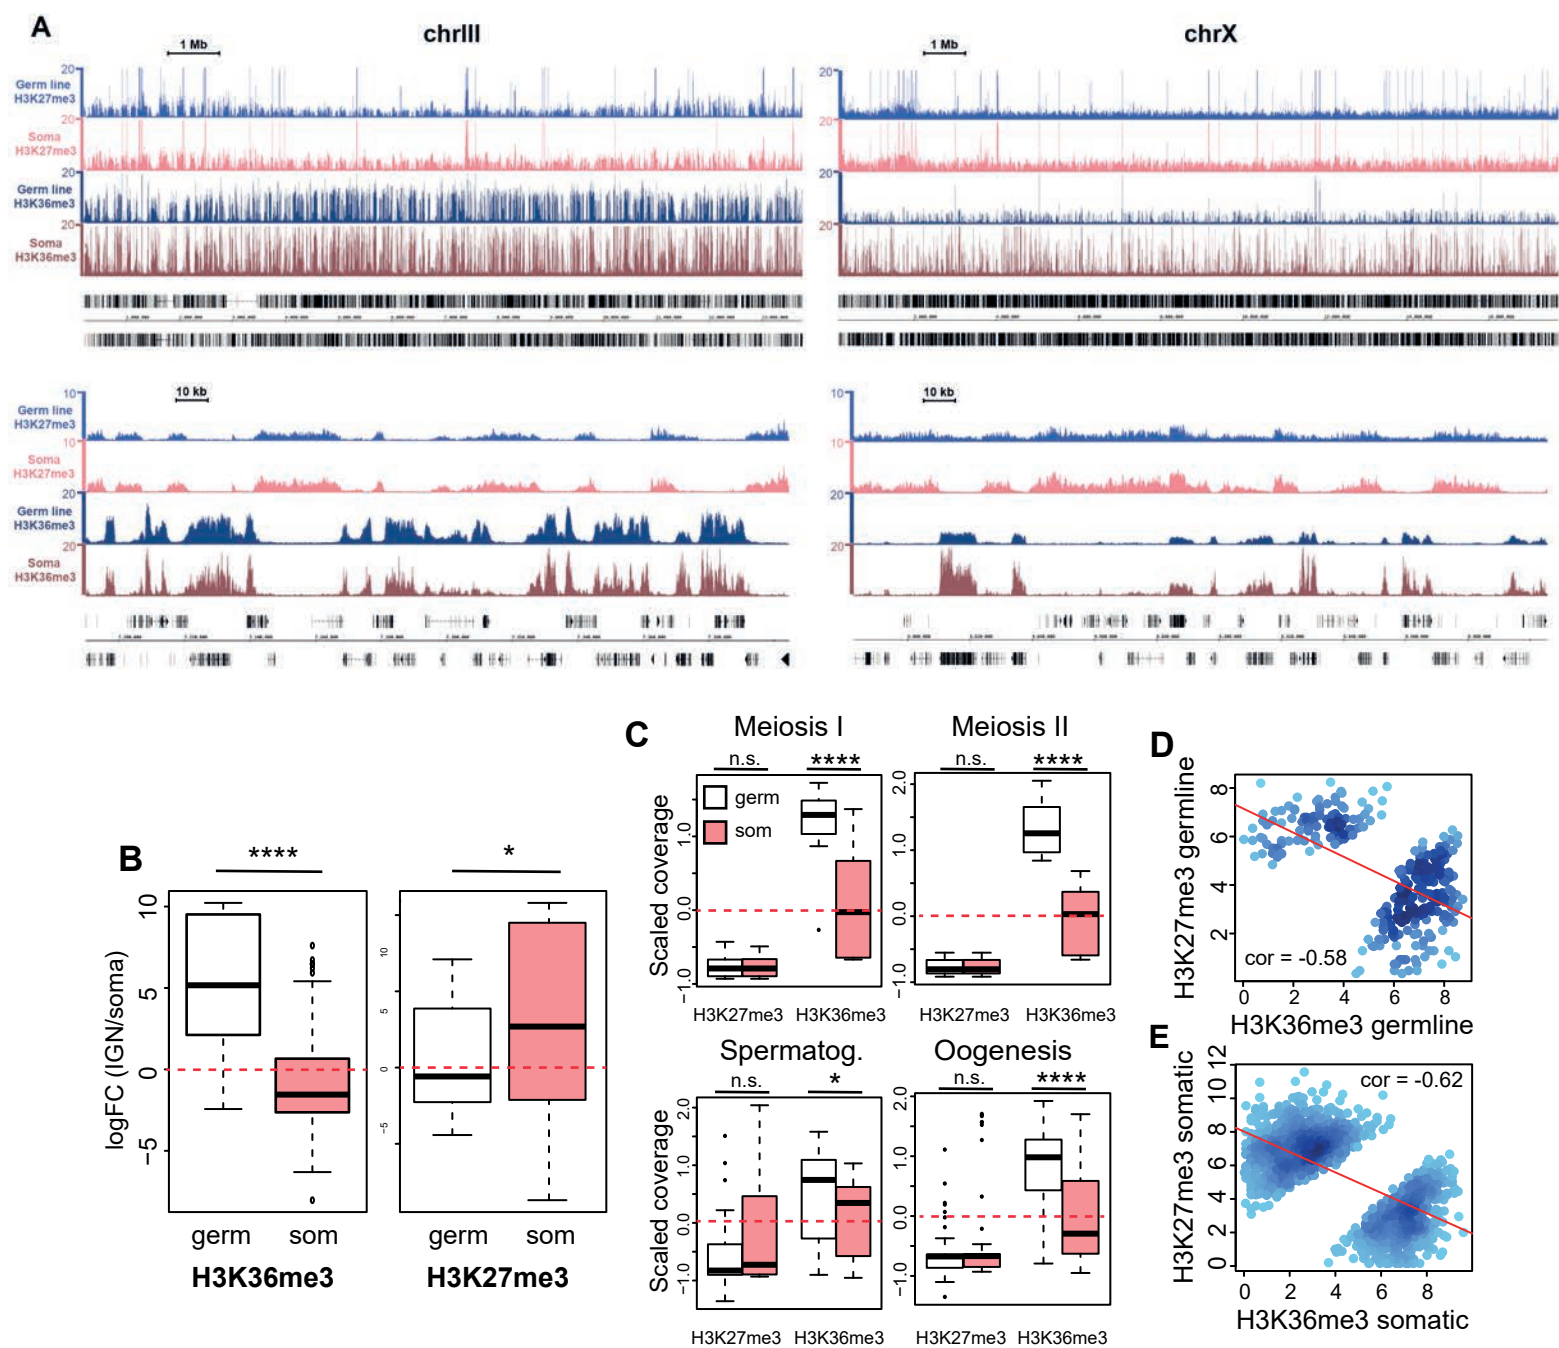

Figure S2

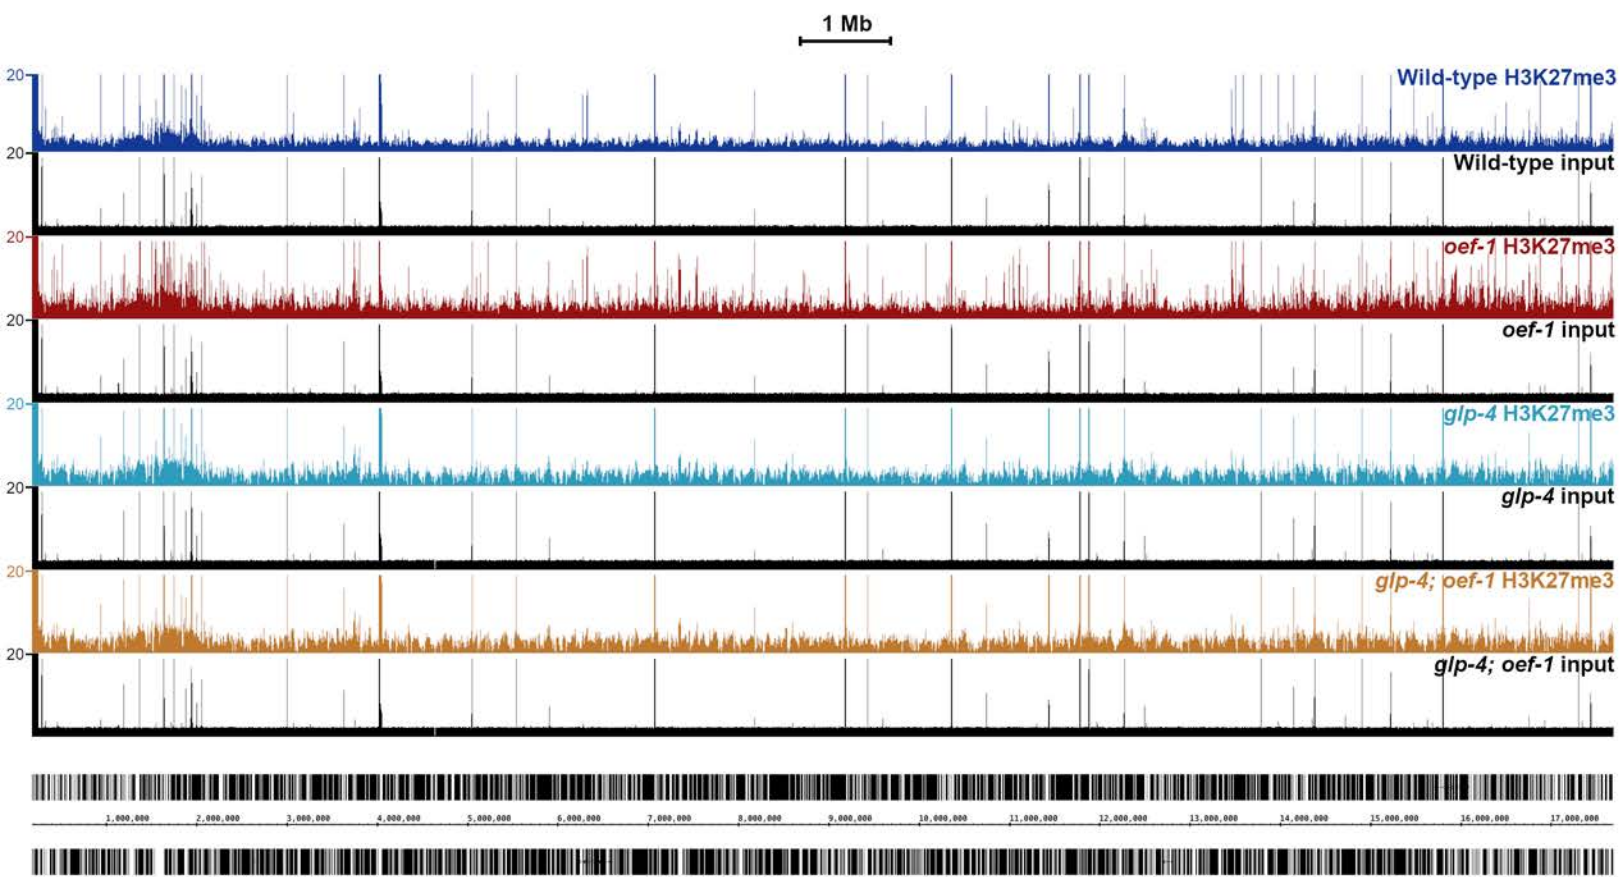

Figure S3

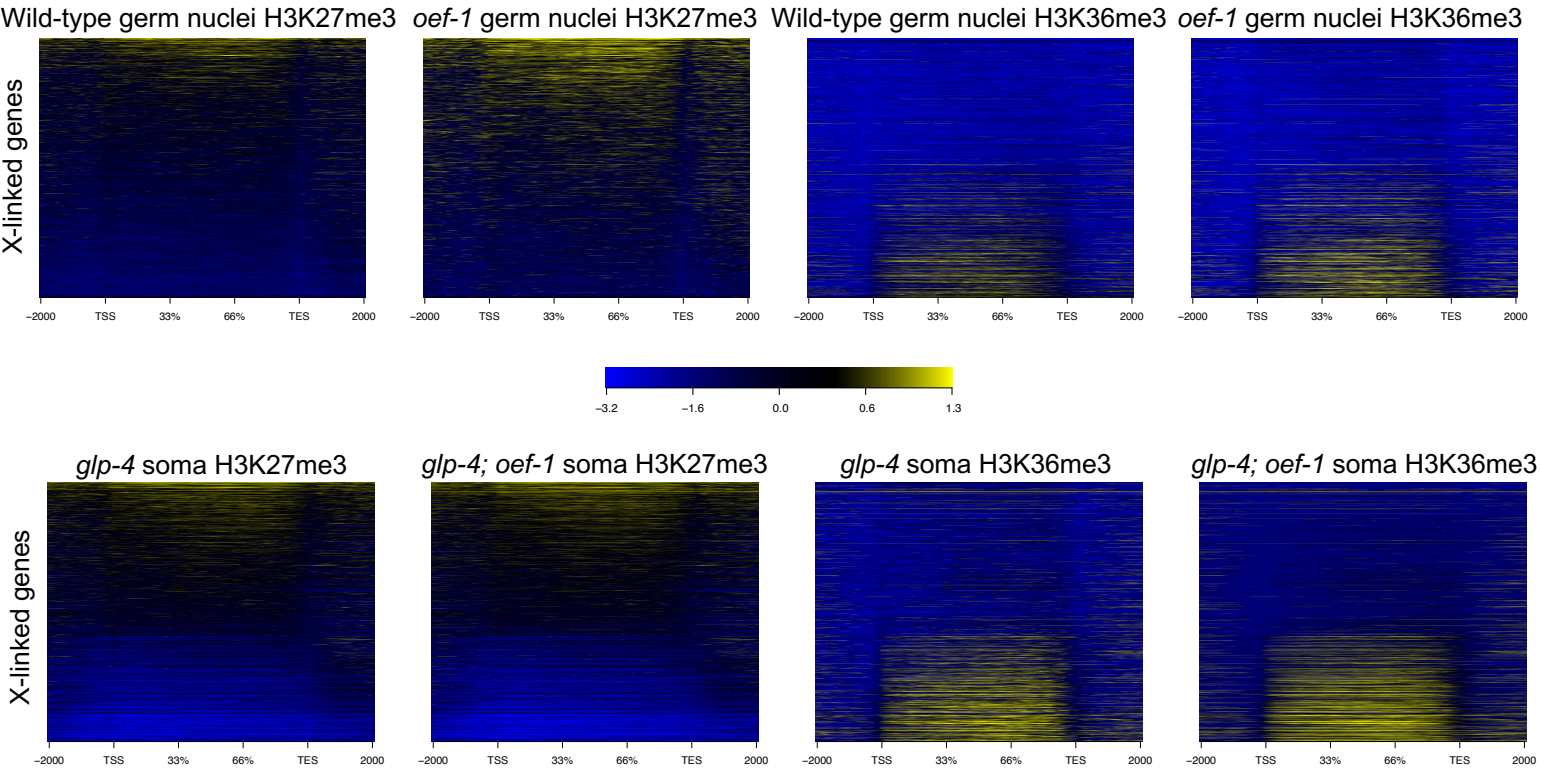

Figure S4

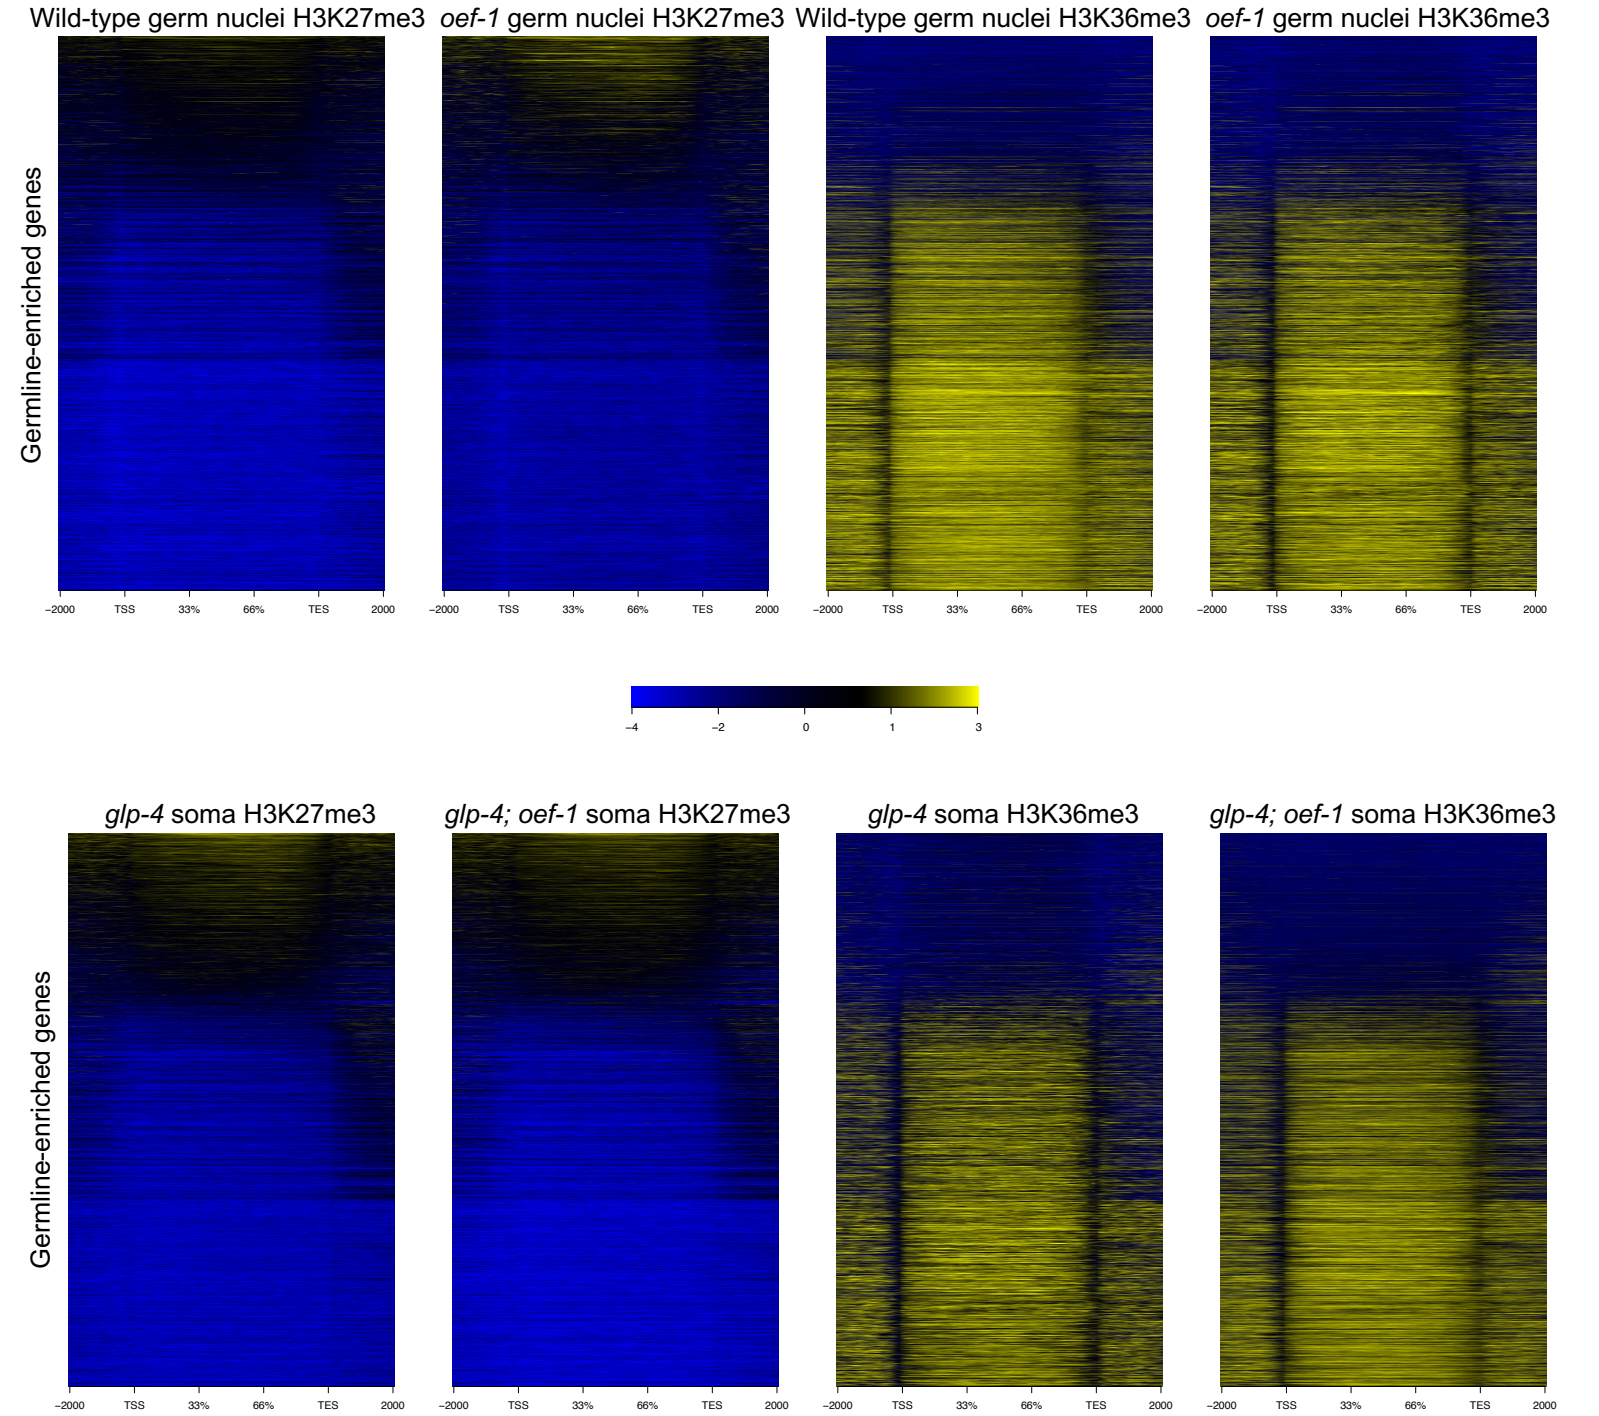

Figure S5

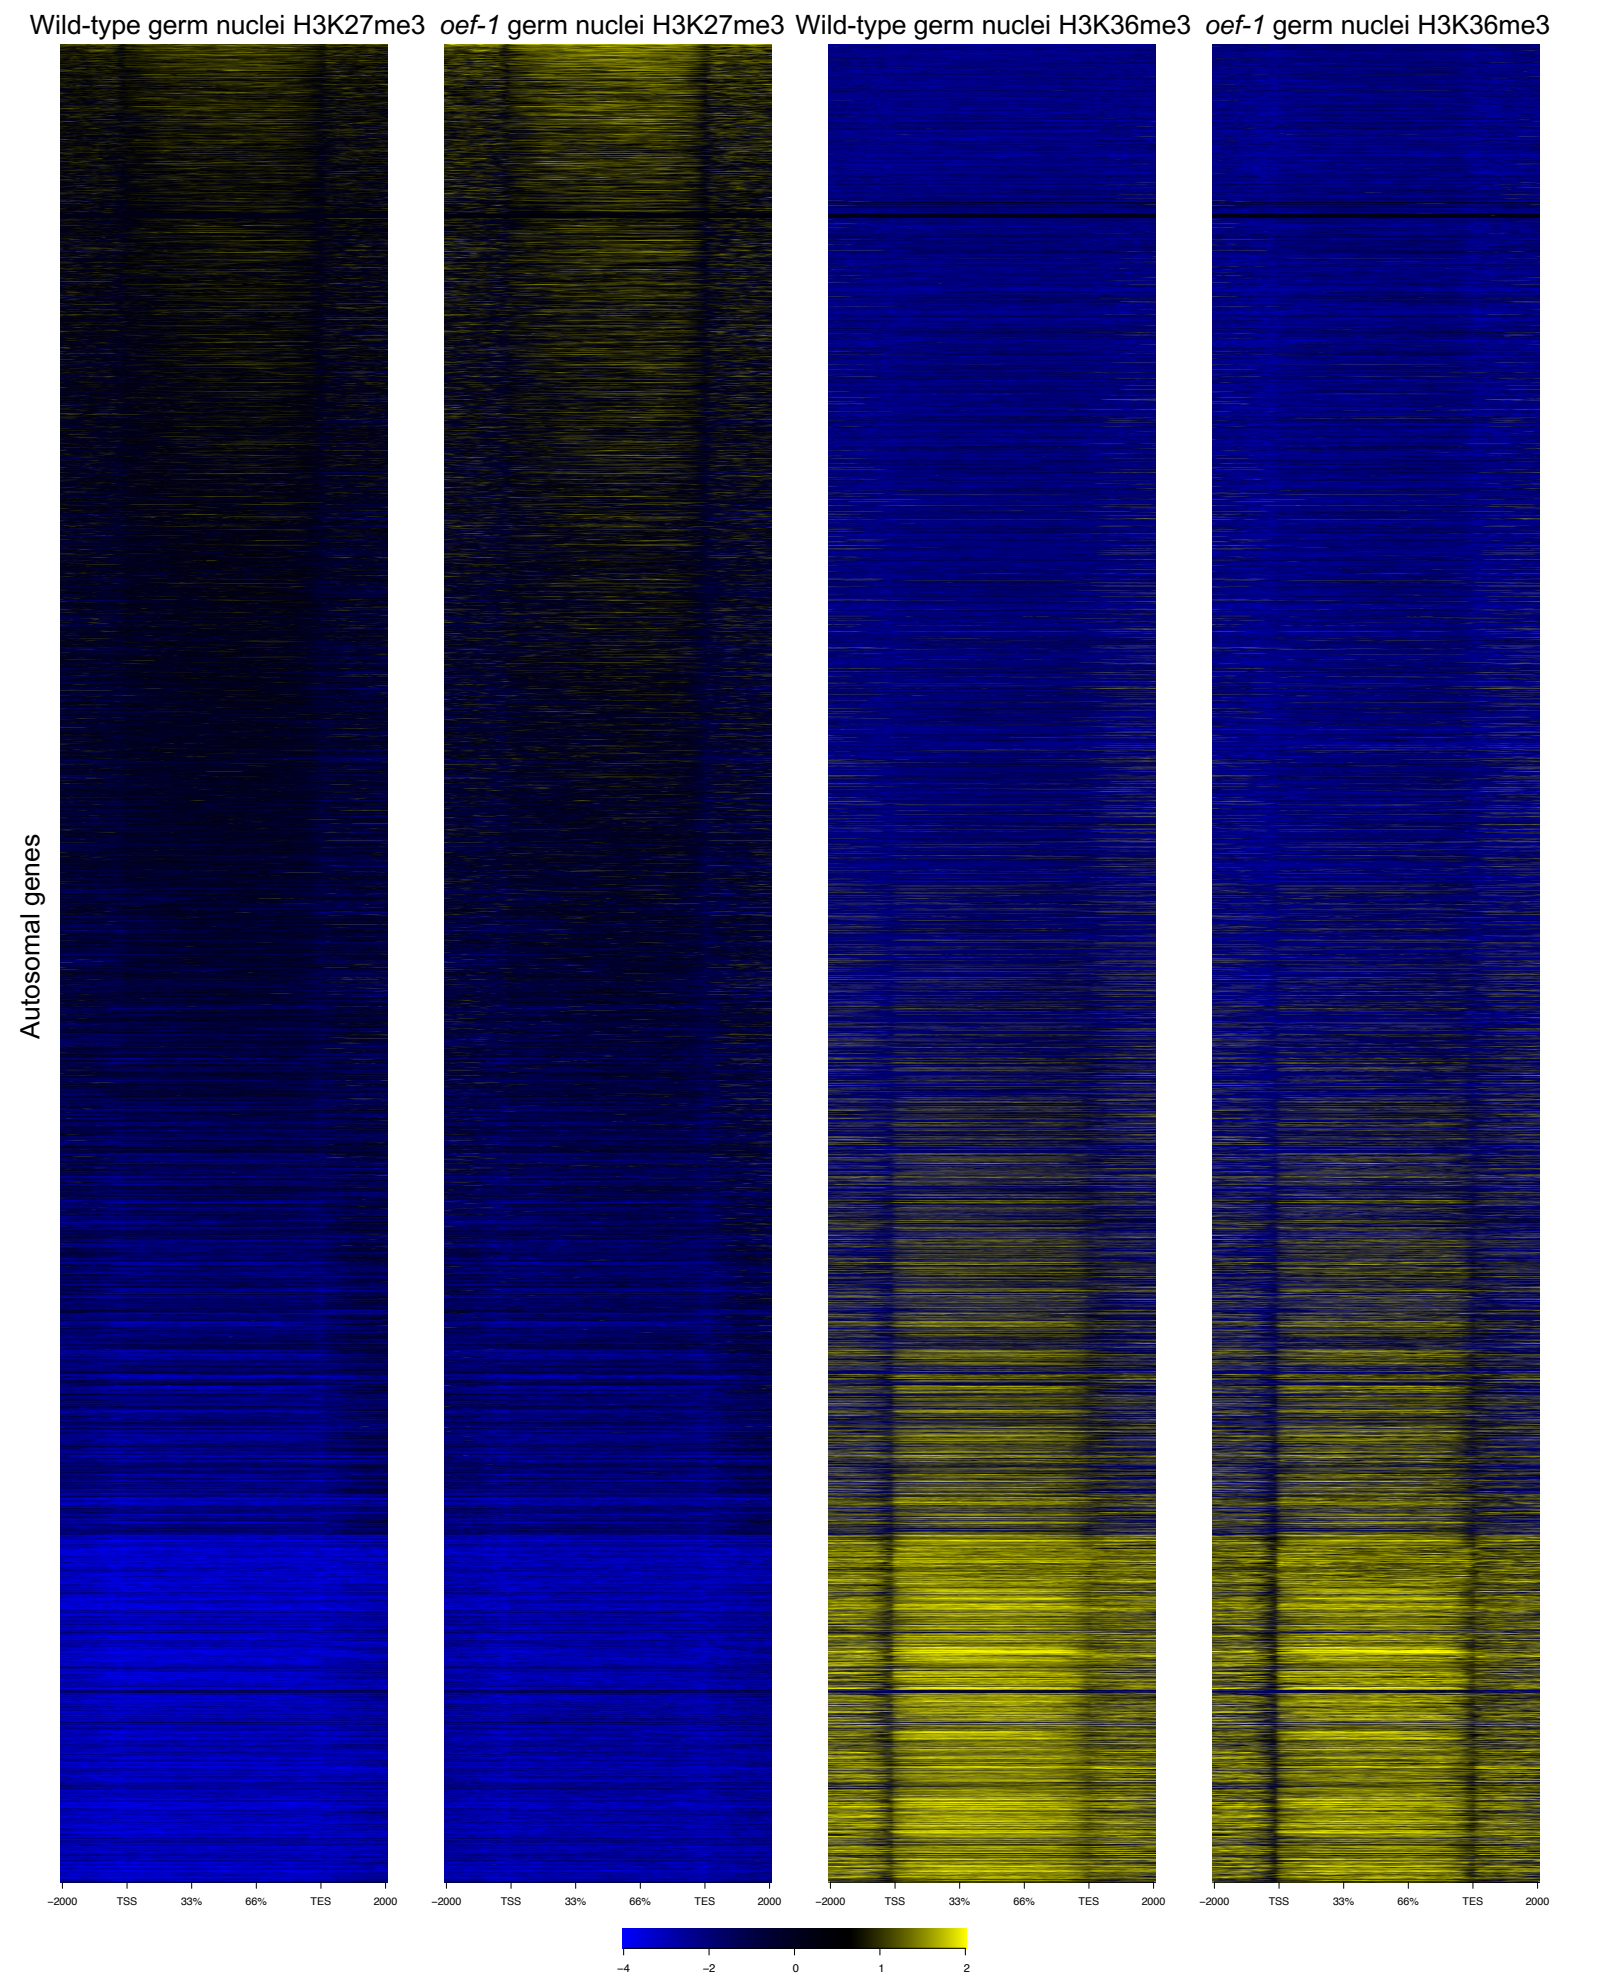

Figure S6

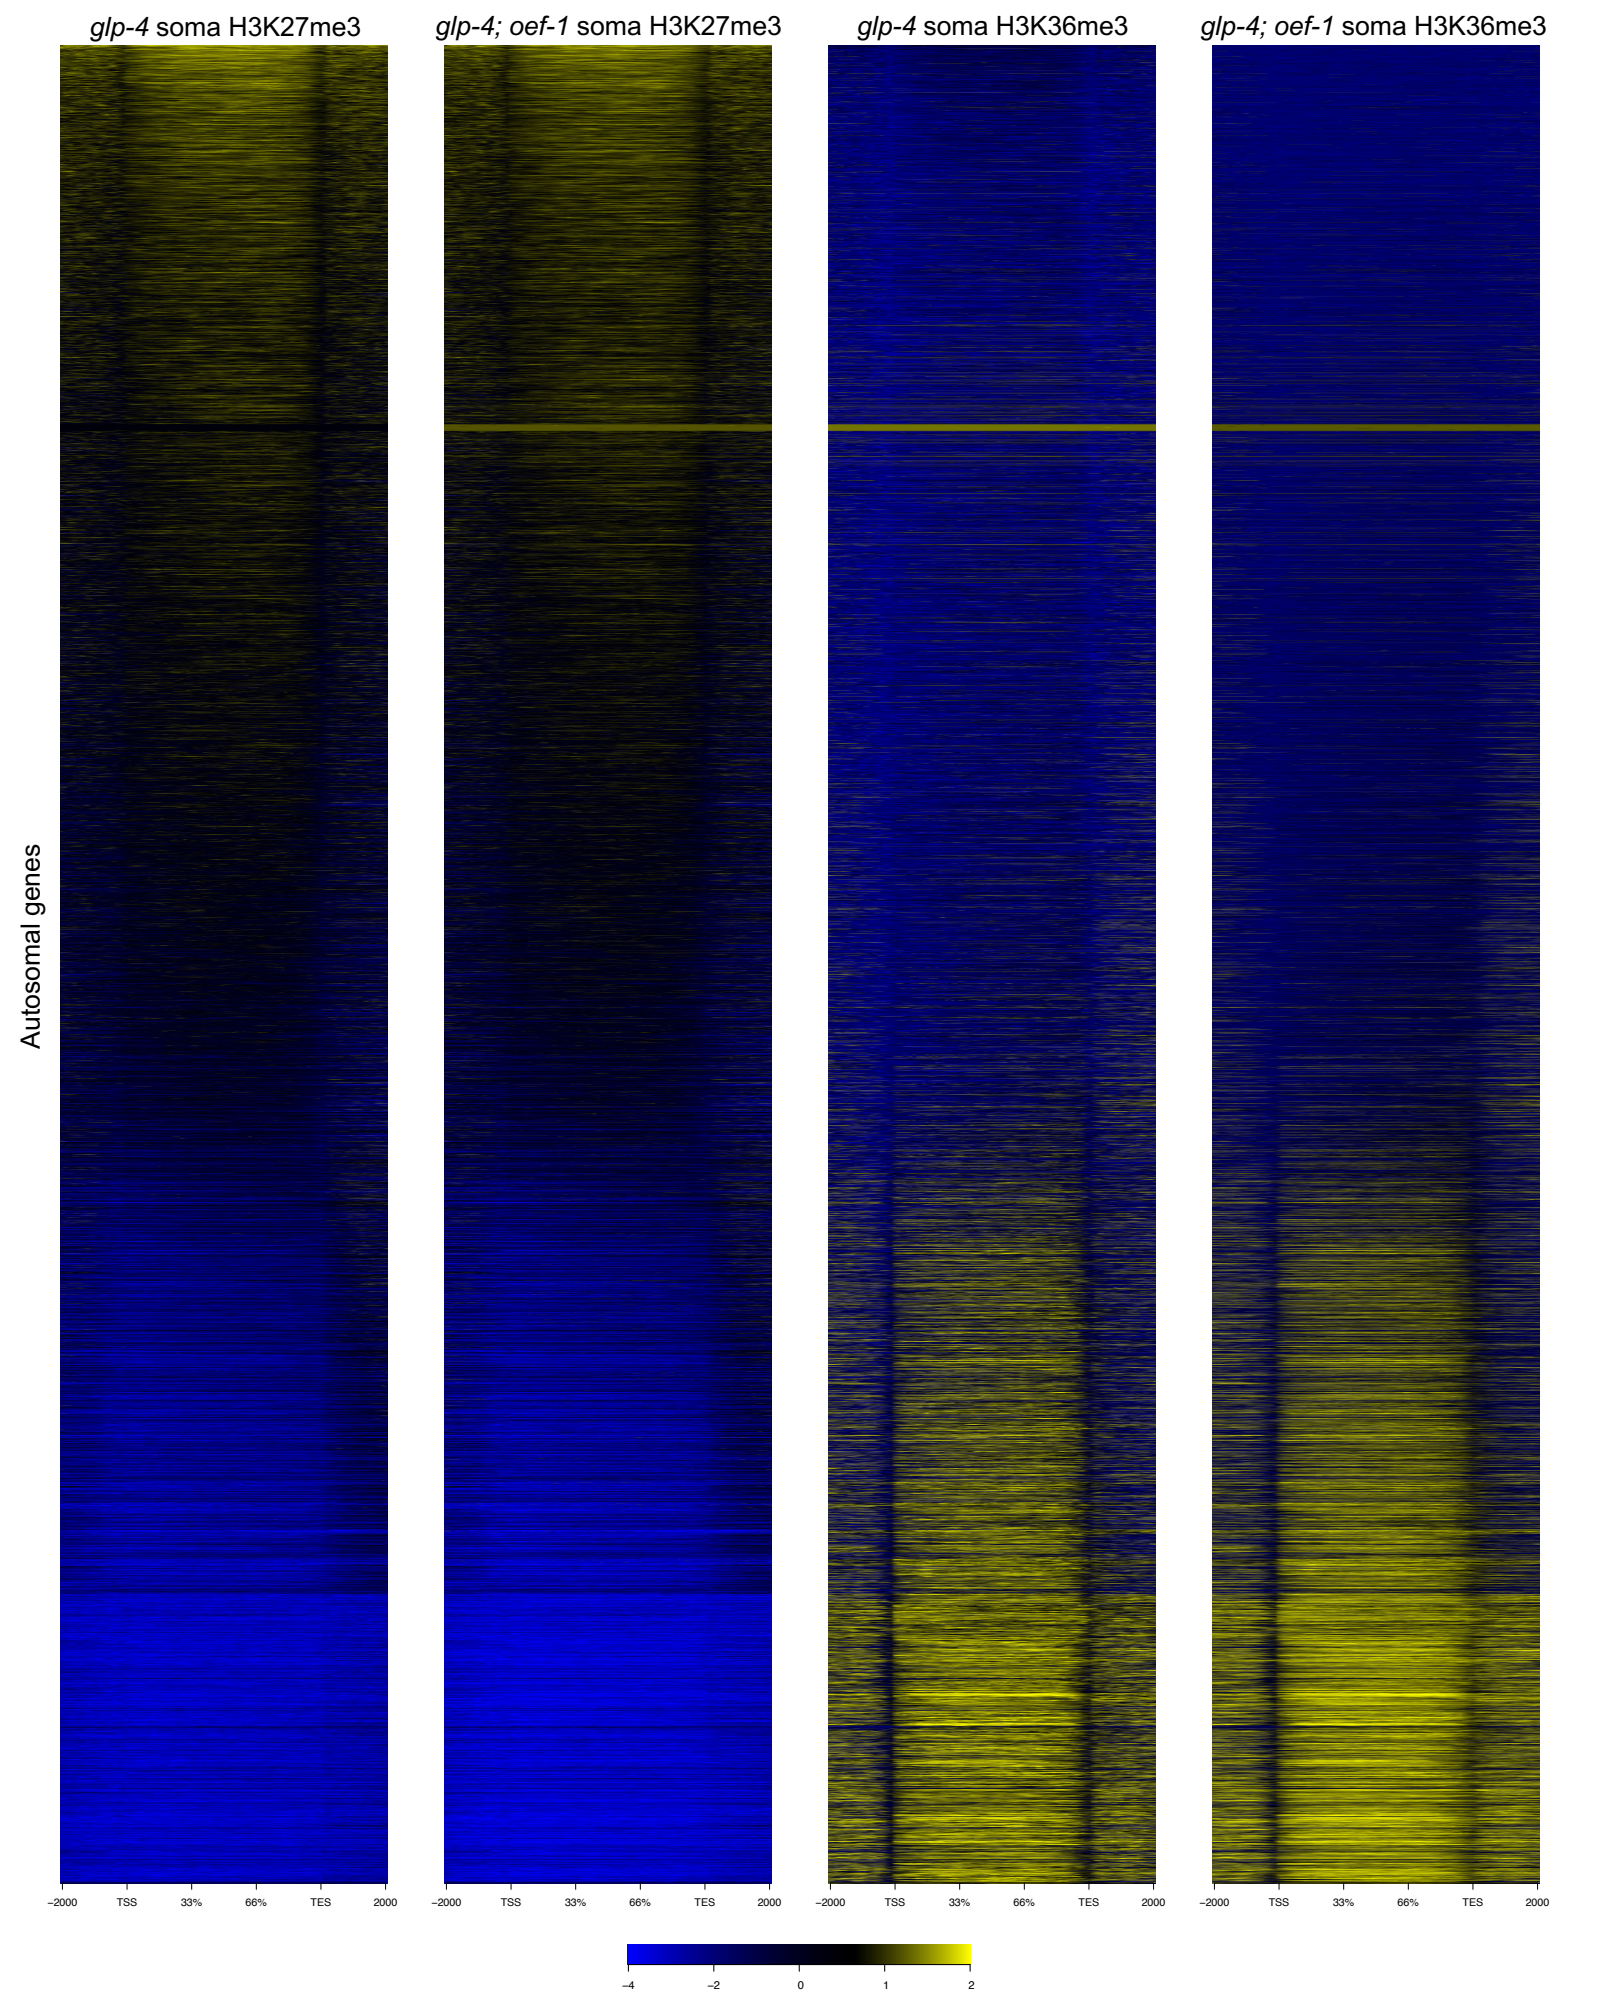

**Figure S7**

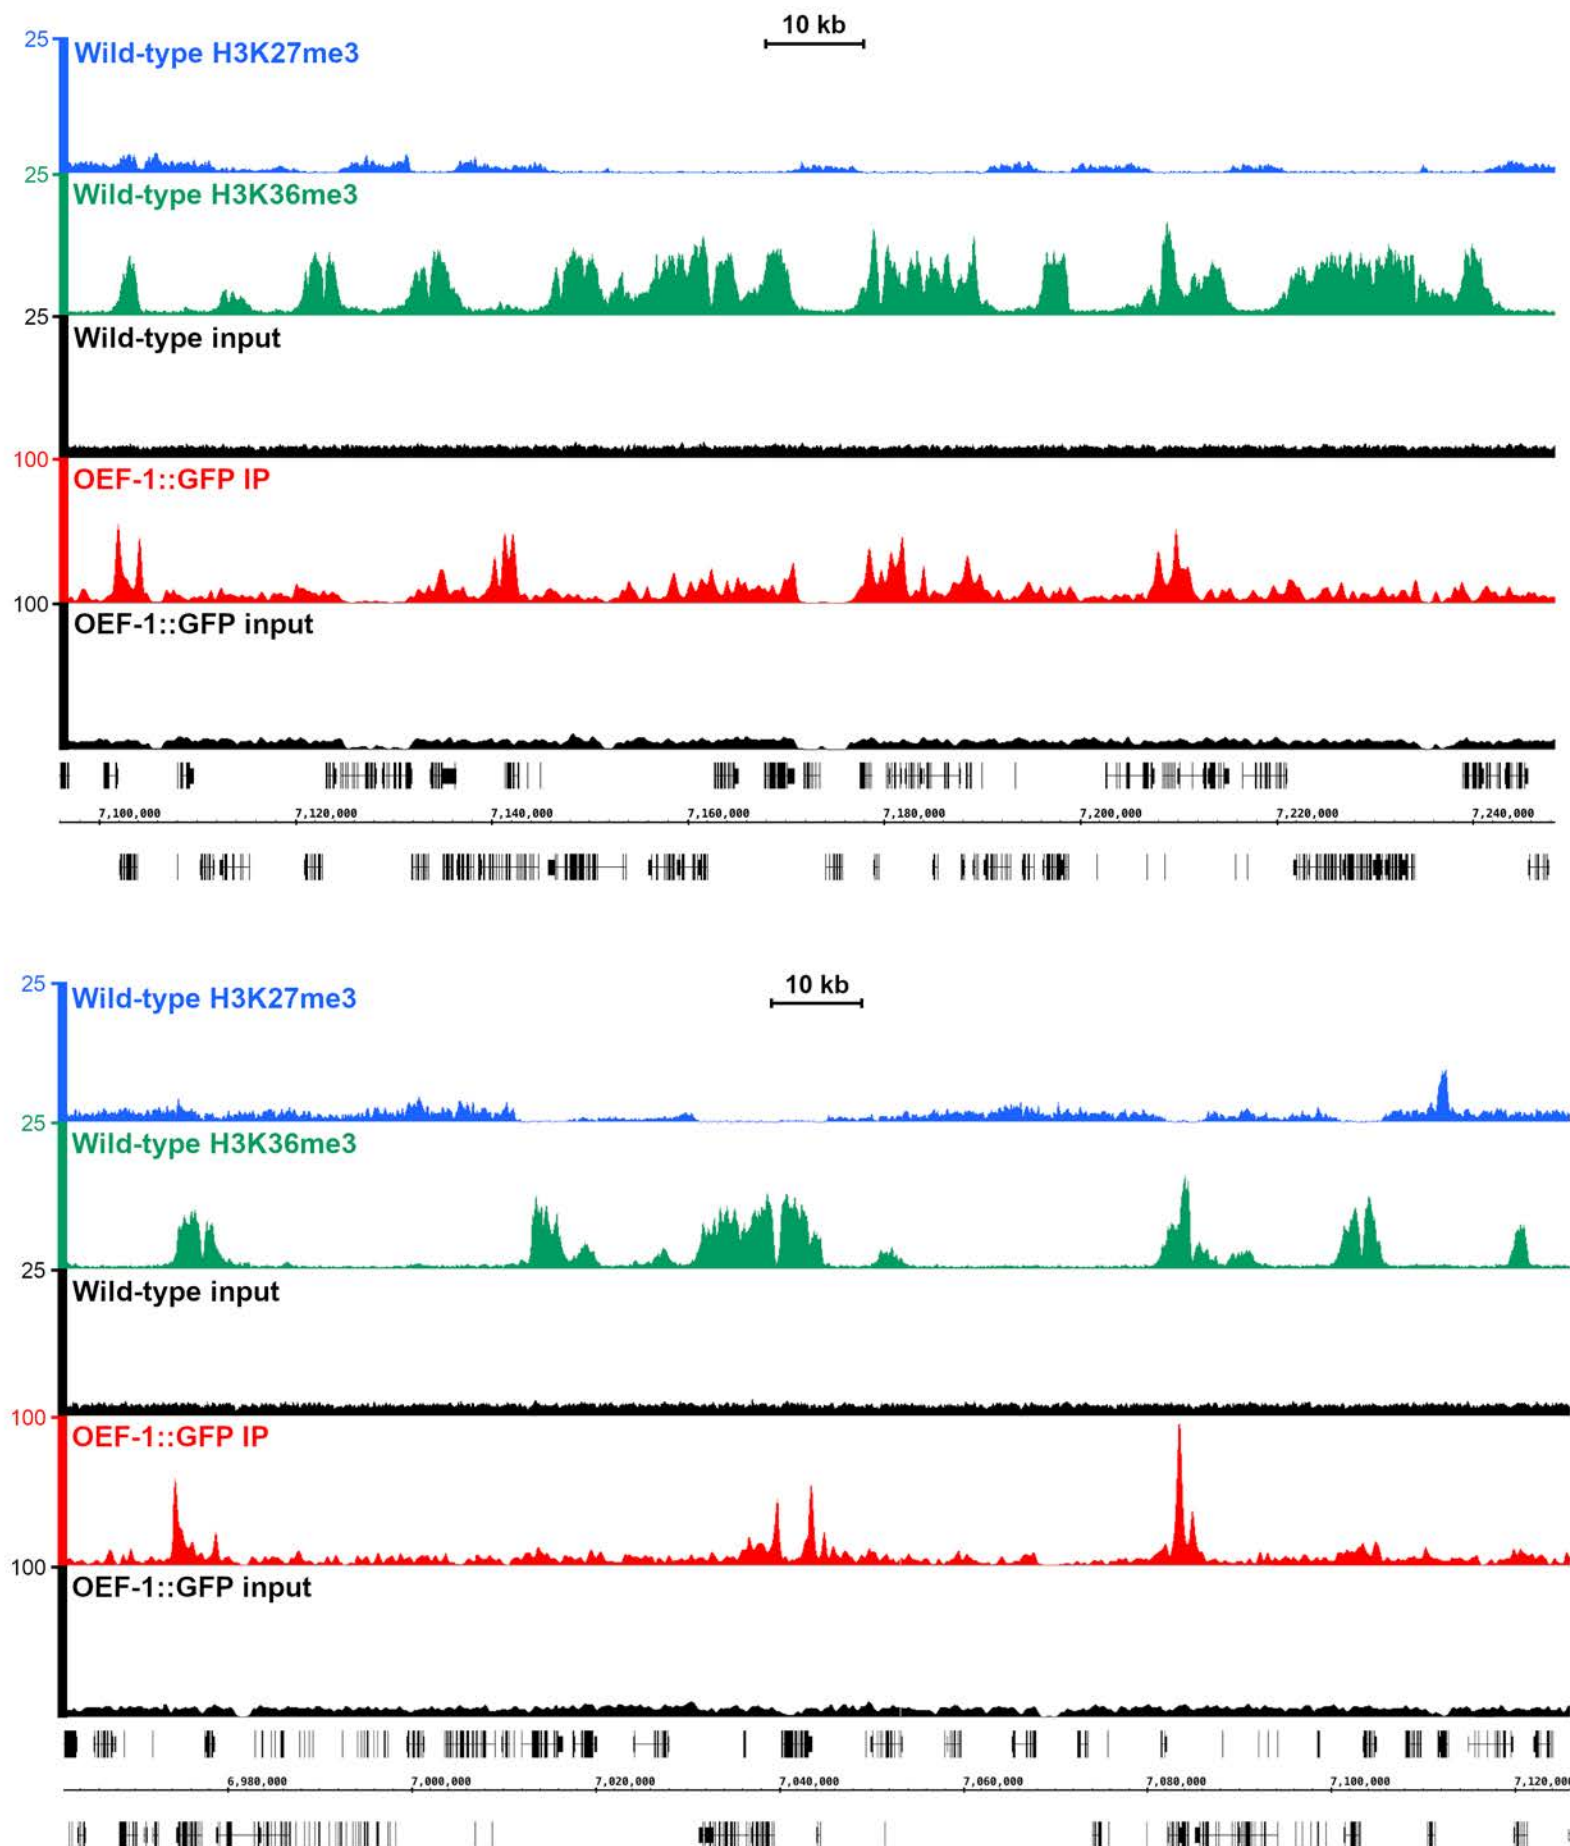

Figure S8

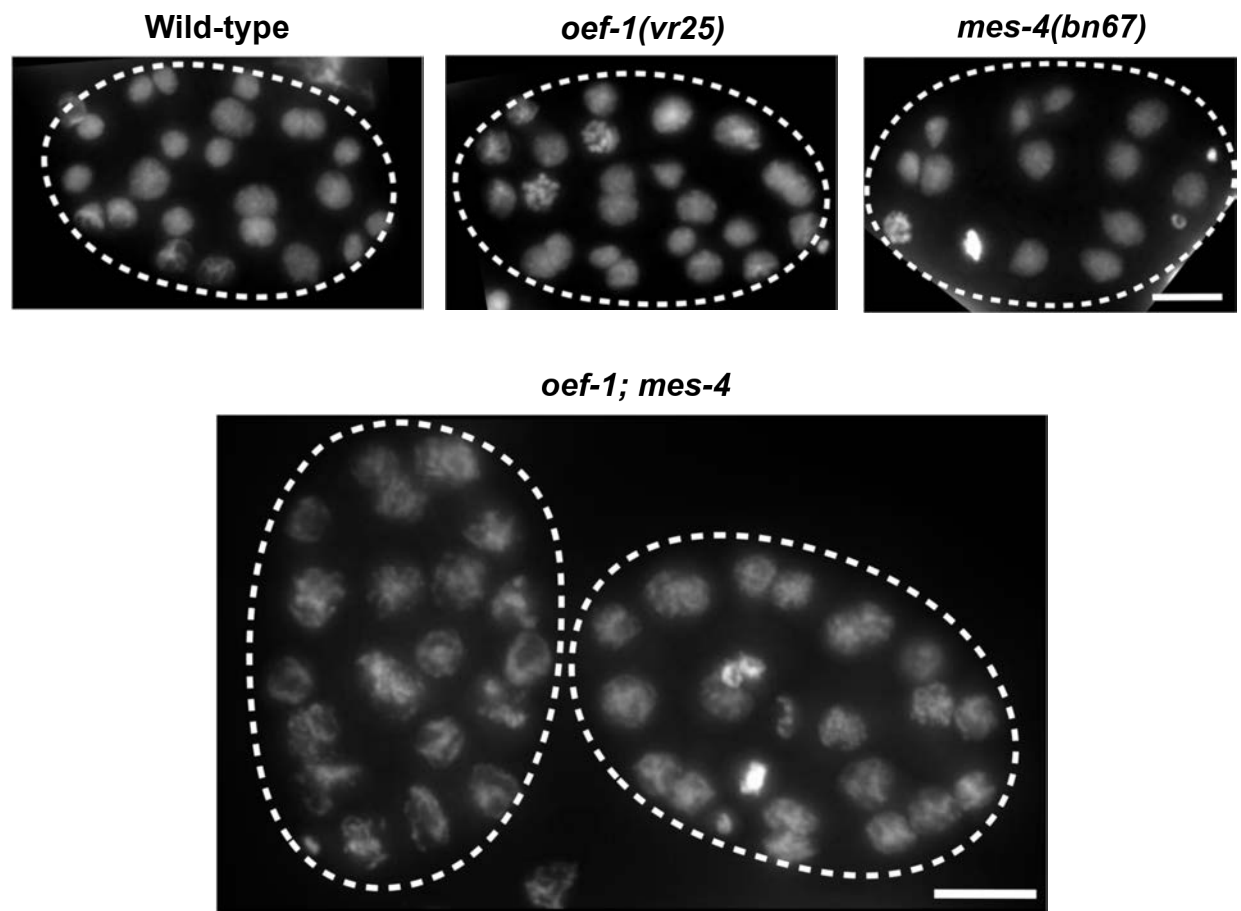

Figure S9

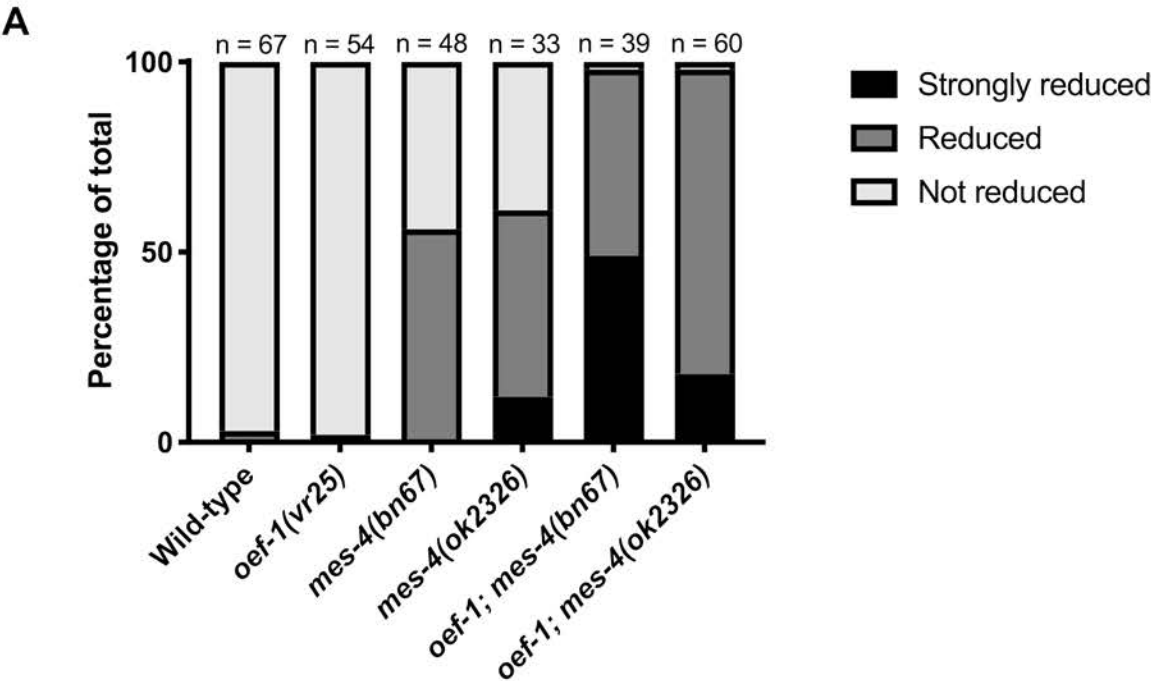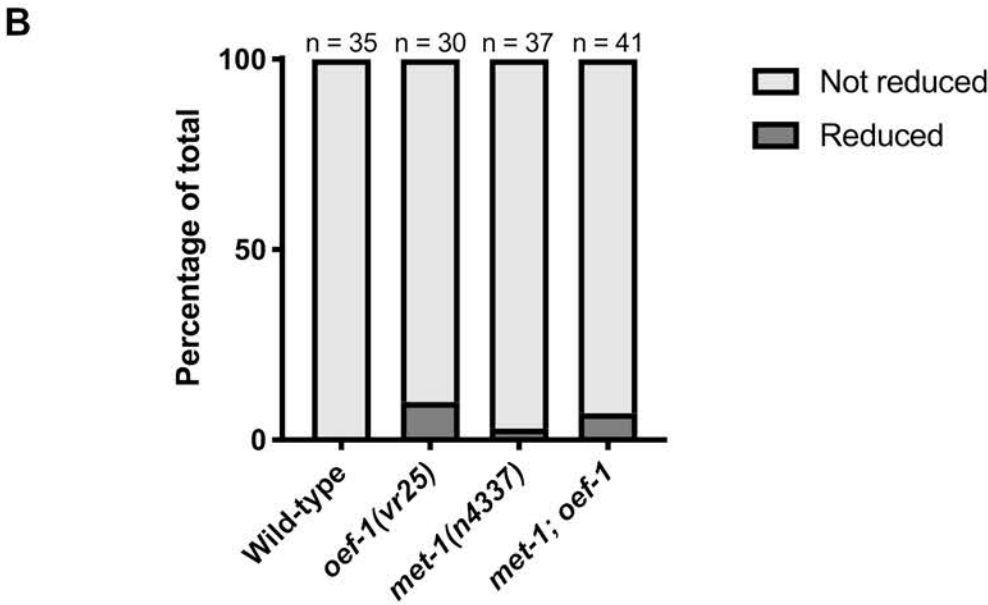

Figure S10

A

| Sample            | Ref.           | Tissue           | Cond.        | GEO ID     | Contrast                          |
|-------------------|----------------|------------------|--------------|------------|-----------------------------------|
| N2 rep1           | -              | dissected gonads | wt           | GSM4430054 | ctrl (wt/wt) and <i>oef-1</i> /wt |
| N2 rep2           | -              | dissected gonads | wt           | GSM4430055 | ctrl (wt/wt) and <i>oef-1</i> /wt |
| N2 rep3           | -              | dissected gonads | wt           | GSM4430056 | ctrl (wt/wt) and <i>oef-1</i> /wt |
| <i>oef-1</i> rep1 | -              | dissected gonads | <i>oef-1</i> | GSM4430057 | <i>oef-1</i> /wt                  |
| <i>oef-1</i> rep2 | -              | dissected gonads | <i>oef-1</i> | GSM4430058 | <i>oef-1</i> /wt                  |
| <i>oef-1</i> rep3 | -              | dissected gonads | <i>oef-1</i> | GSM4430059 | <i>oef-1</i> /wt                  |
| N2 rep1 (v2)      | Herbette et al | dissected gonads | wt           | GSM4411148 | ctrl (wt/wt)                      |
| N2 rep2 (v2)      | Herbette et al | dissected gonads | wt           | GSM4411149 | ctrl (wt/wt)                      |
| N2 rep3 (v2)      | Herbette et al | dissected gonads | wt           | GSM4411150 | ctrl (wt/wt)                      |

B

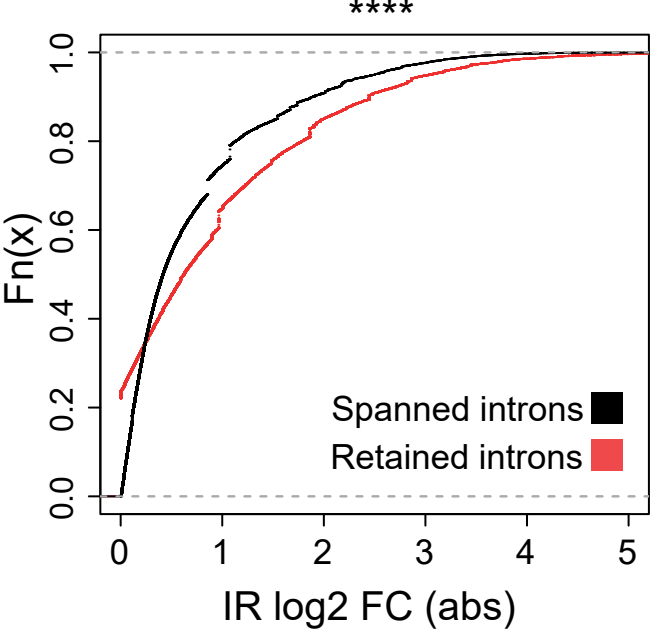

C

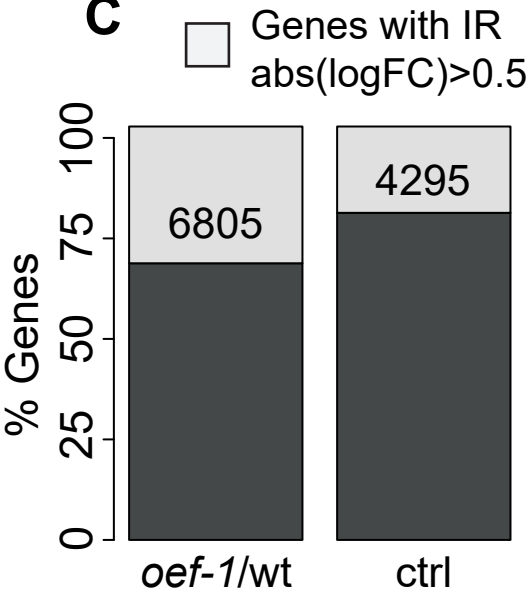

Figure S11

A

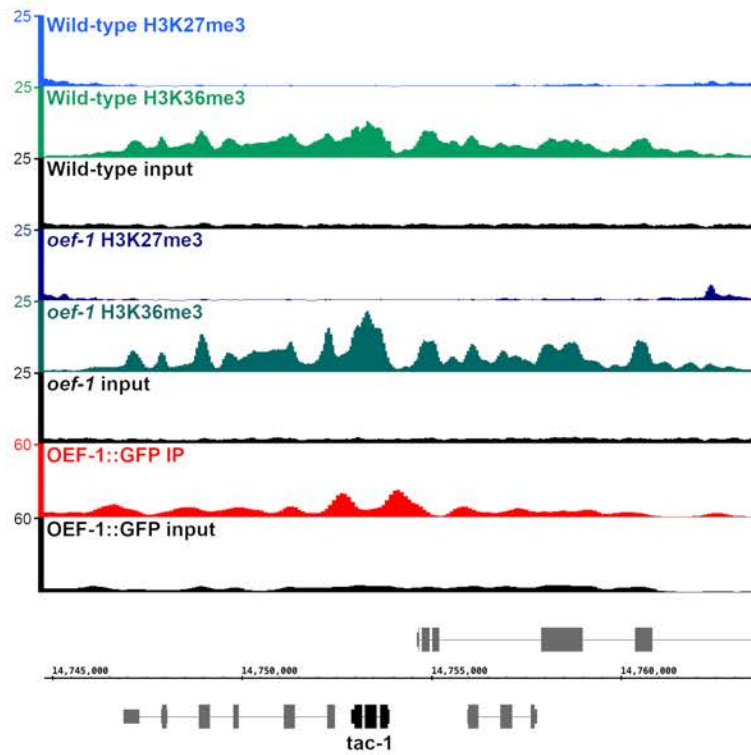

B

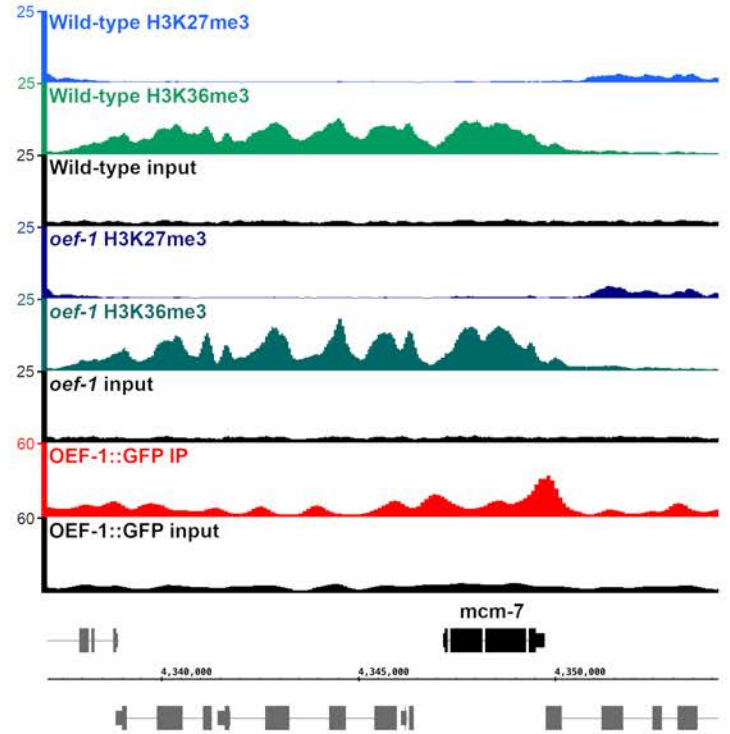

C

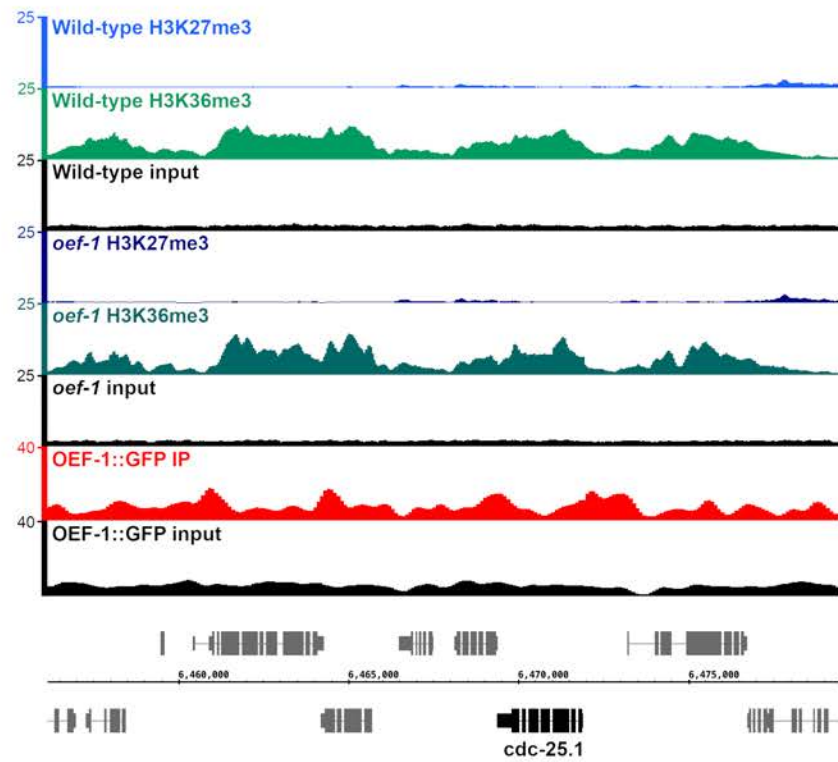

Figure S12

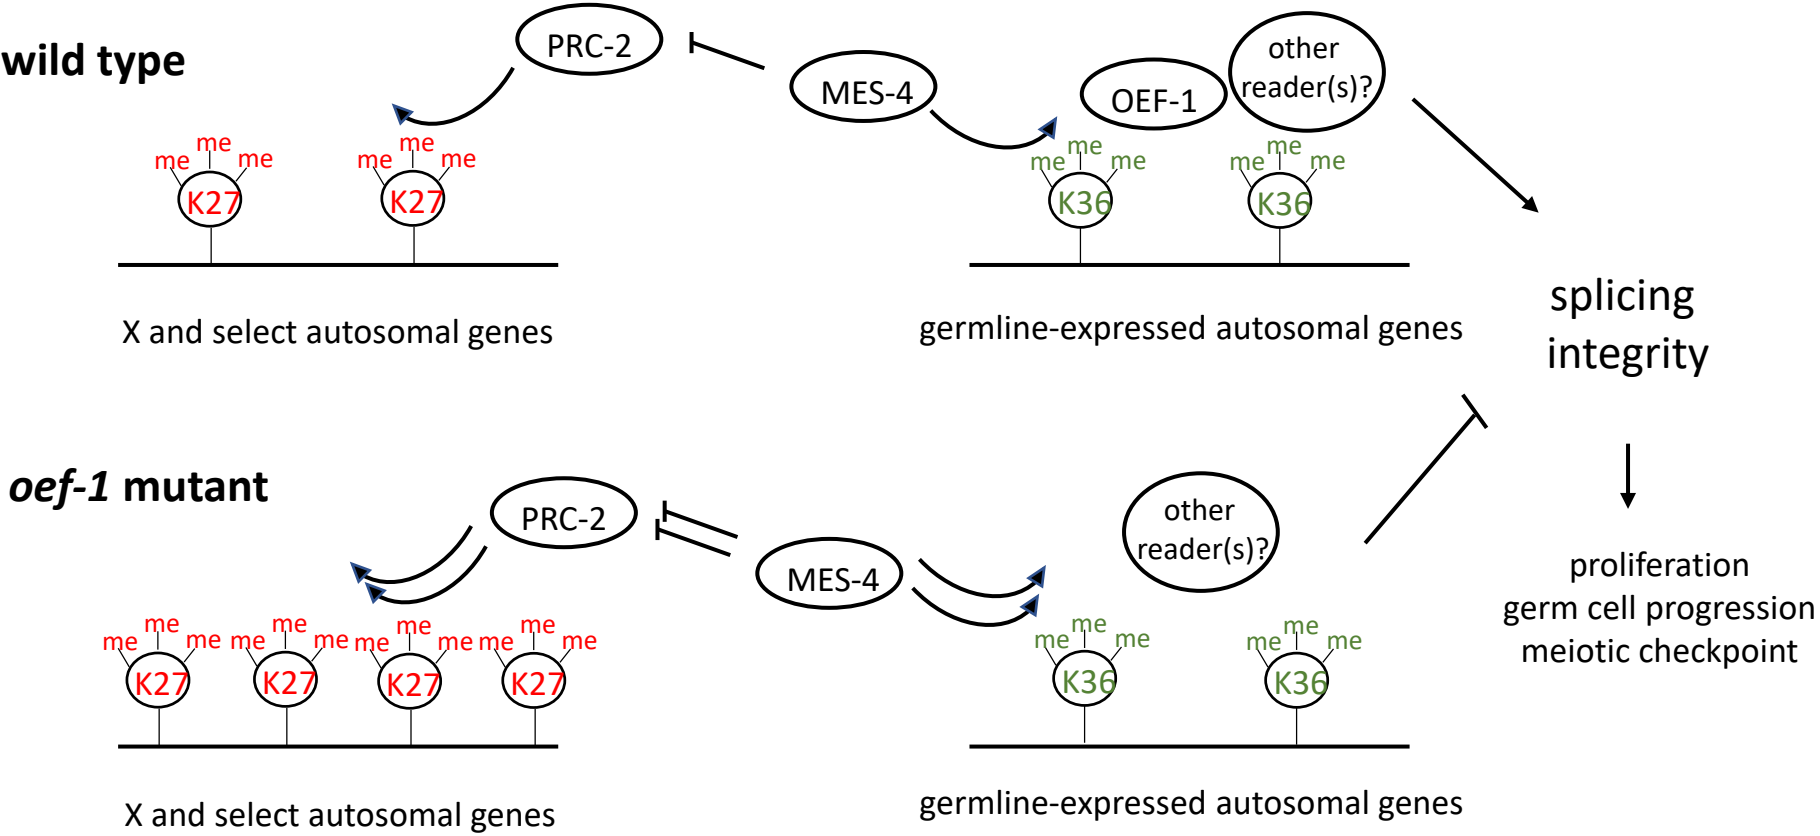

Supplement: Supplementary file 1 [file 1]
