# Supplementary material
Source: publisher figshare collection journal article supplement (https://gsajournals.figshare.com/articles/dataset/_/16586714)
Supplement: Supplementary file 1 [file 1]

## Sheet: data_DESeq2_CuffDiff_NEW
File S1. Differential analysis results (from RNAseq)
	DESeq2 analysis				CuffDiff analysis				Annotation							Overlapped results (from the two tests)
	logFC (wt/oef-1)	logFC (oef-1/wt)	pvalue	padj	logFC (wt/oef-1)	logFC (oef-1/wt)	p_value	q_value	external_gene_name	entrezgene_id	chromosome_name	wormbase_cds	gene_id	gene	locus	significant	OEF-1 target
WBGene00000734	-3.34163	3.34163	2.00446e-15	4.19566e-12	3.67513	-3.67513	5e-05	0.0133057	col-161	179812	V	C50B6.4	XLOC_031864	col-161	chrV:13317061-13317984	yes	yes
WBGene00000719	-1.86443	1.86443	7.92732e-15	1.24449e-11	3.06443	-3.06443	5e-05	0.0133057	col-146	188178	V	T06E4.6	XLOC_027544	col-146	chrV:9629932-9630936	yes	no
WBGene00004747	2.19846	-2.19846	8.54145e-18	2.6818e-14	-2.23912	2.23912	5e-05	0.0133057	sdc-3	180009	V	C25D7.3	XLOC_032155	sdc-3	chrV:15039339-15047774	yes	no
WBGene00020235	2.11325	-2.11325	2.44483e-25	3.07046e-21	-2.10521	2.10521	5e-05	0.0133057	T05A12.4	177453	IV	T05A12.4	XLOC_013826	T05A12.4	chrIV:6888969-6897517	yes	no
WBGene00012198	2.08389	-2.08389	1.6718e-21	1.04981e-17	-2.10394	2.10394	5e-05	0.0133057	W02B8.2	175043	II	W02B8.2	XLOC_005972	W02B8.2	chrII:13908850-13915045	yes	no
WBGene00000602	-2.01219	2.01219	1.28176e-13	1.78862e-10	2.32464	-2.32464	5e-05	0.0133057	col-13	179452	V	F15H10.2	XLOC_031183	col-13	chrV:10420866-10421869	yes	no
WBGene00017373	1.42368	-1.42368	1.93563e-13	2.20996e-10	-1.41364	1.41364	5e-05	0.0133057	F10G7.10	173813	II	F10G7.10a	XLOC_006819	F10G7.10	chrII:4713794-4726136	yes	yes
WBGene00020183	-2.20256	2.20256	4.97998e-13	5.21197e-10	2.31641	-2.31641	5e-05	0.0133057	T03D3.5	178743	V	T03D3.5	XLOC_029810	T03D3.5	chrV:2824103-2826818	yes	no
WBGene00000601	-1.96132	1.96132	5.82202e-12	5.62452e-09	1.86963	-1.86963	5e-05	0.0133057	col-12	179453	V	F15H10.1	XLOC_031184	col-12	chrV:10423984-10424987	yes	no
WBGene00000914	1.60785	-1.60785	1.94716e-10	1.74674e-07	-1.4102	1.4102	5e-05	0.0133057	daf-19	174577	II	F33H1.1a	XLOC_007813	daf-19	chrII:10157893-10169262	yes	yes
WBGene00016678	1.6062	-1.6062	2.46685e-10	2.06541e-07	-1.34763	1.34763	5e-05	0.0133057	C45G9.7	175685	III	C45G9.7	XLOC_010827	C45G9.7	chrIII:5046251-5047106	yes	yes
WBGene00000596	-1.82535	1.82535	1.01385e-09	7.07386e-07	1.75631	-1.75631	5e-05	0.0133057	col-7	172494	I	C15A11.5	XLOC_000878	col-7	chrI:7401693-7402705	yes	no
WBGene00000720	-1.32486	1.32486	1.05254e-08	6.60946e-06	1.25761	-1.25761	5e-05	0.0133057	col-147	179351	V	T06E4.4	XLOC_031026	col-147	chrV:9632297-9633302	yes	no
WBGene00006394	1.21721	-1.21721	1.71353e-08	1.02477e-05	-1.24498	1.24498	5e-05	0.0133057	taf-11.2	172451	I	K10D3.3	XLOC_000843	taf-11.2	chrI:7132496-7134173	yes	no
WBGene00000638	-1.787	1.787	2.376e-08	1.2974e-05	1.63082	-1.63082	5e-05	0.0133057	col-62	172495	I	C15A11.6	XLOC_002764	col-62	chrI:7403337-7404349	yes	no
WBGene00015577	-1.34112	1.34112	5.10869e-08	2.35404e-05	1.31639	-1.31639	5e-05	0.0133057	ugt-64	178774	V	C07G3.9a	XLOC_029947	ugt-64	chrV:3503202-3505680	yes	yes
WBGene00000707	-1.62756	1.62756	5.24829e-08	2.35404e-05	1.61245	-1.61245	5e-05	0.0133057	col-133	186083	IV	F52B11.4	XLOC_022630	col-133	chrIV:14098342-14099327	yes	no
WBGene00020025	1.24778	-1.24778	6.38326e-08	2.67225e-05	-1.31563	1.31563	5e-05	0.0133057	R12C12.5	174010	II	R12C12.5	XLOC_007072	R12C12.5	chrII:6044264-6045111	yes	yes
WBGene00011964	1.78252	-1.78252	6.18989e-08	2.67225e-05	-1.64912	1.64912	5e-05	0.0133057	saeg-2	176303	III	T23G5.6	XLOC_009675	saeg-2	chrIII:9240342-9242117	yes	no
WBGene00001906	1.36583	-1.36583	7.84589e-08	3.07927e-05	-1.28631	1.28631	5e-05	0.0133057	his-32	177628	IV	F17E9.10	XLOC_014117	his-32	chrIV:8334291-8334702	yes	no
WBGene00000753	-1.57355	1.57355	1.06382e-07	4.04864e-05	1.56615	-1.56615	5e-05	0.0133057	col-180	181356	X	C44C10.1	XLOC_037591	col-180	chrX:11711310-11712213	yes	no
WBGene00021627	-2.81388	2.81388	1.51706e-07	5.60374e-05	2.92167	-2.92167	0.0001	0.023418	Y47D7A.15	260235	V	Y47D7A.15	XLOC_030101	Y47D7A.15	chrV:4431806-4433161	yes	no
WBGene00003040	1.19961	-1.19961	7.94169e-07	0.000262473	-1.14684	1.14684	5e-05	0.0133057	lin-59	266825	I	T12F5.4	XLOC_002197	lin-59	chrI:3713766-3721063	yes	no
WBGene00018393	-0.918613	0.918613	2.51866e-06	0.000718905	0.906046	-0.906046	5e-05	0.0133057	msra-1	185709	II	F43E2.5	XLOC_007324	msra-1	chrII:7363233-7363990	yes	no
WBGene00012379	-1.24333	1.24333	3.23789e-06	0.00090366	1.2009	-1.2009	5e-05	0.0133057	Y1A5A.1	175515	III	Y1A5A.1	XLOC_010654	Y1A5A.1	chrIII:3985653-3986789	yes	no
WBGene00000699	-1.5002	1.5002	4.65296e-06	0.00127036	1.52453	-1.52453	5e-05	0.0133057	col-125	178029	IV	C29F4.1	XLOC_014622	col-125	chrIV:11225493-11226463	yes	yes
WBGene00015236	1.09069	-1.09069	3.51721e-05	0.00833446	-1.17798	1.17798	5e-05	0.0133057	B0511.11	259397	I	B0511.11	XLOC_003257	B0511.11	chrI:10648627-10654168	yes	yes
WBGene00008779	1.70333	-1.70333	3.38185e-05	0.00831625	-1.74372	1.74372	0.0001	0.023418	F14B4.1	172750	I	F14B4.1	XLOC_003020	F14B4.1	chrI:9266081-9270907	yes	yes
WBGene00017968	-0.871717	0.871717	2.57387e-05	0.00659699	0.85966	-0.85966	0.0002	0.0433667	skpo-3	174191	II	F32A5.2a	XLOC_004975	skpo-3	chrII:7245876-7249937	yes	no
WBGene00011498	1.10005	-1.10005	0.000121585	0.0246287	-1.46157	1.46157	5e-05	0.0133057	T05G5.1	3565362	III	T05G5.1a	XLOC_011553	T05G5.1	chrIII:9739271-9743251	yes	yes
WBGene00000722	-1.06688	1.06688	0.000126634	0.0250062	1.03371	-1.03371	5e-05	0.0133057	col-149	179431	V	B0024.1	XLOC_031153	col-149	chrV:10291768-10292787	yes	no
WBGene00014080	1.10688	-1.10688	0.00012743	0.0250062	-1.11243	1.11243	5e-05	0.0133057	atg-4.2	3565022	IV	ZK792.8	XLOC_014702	atg-4.2	chrIV:11668026-11671378	yes	no
WBGene00000741	-1.20227	1.20227	0.000146428	0.0274475	1.15574	-1.15574	5e-05	0.0133057	col-168	180908	X	T10E10.1	XLOC_033990	col-168	chrX:6326351-6327257	yes	no
WBGene00000740	-1.11496	1.11496	0.000179221	0.0308333	1.24189	-1.24189	5e-05	0.0133057	col-167	180907	X	T10E10.2	XLOC_033989	col-167	chrX:6323451-6324357	yes	no
WBGene00001076	1.45641	-1.45641	0.000245134	0.0399823	-1.52049	1.52049	5e-05	0.0133057	dpy-17	175696	III	F54D8.1	XLOC_009071	dpy-17	chrIII:5107293-5108404	yes	no
WBGene00020349	0.949533	-0.949533	0.00031084	0.0494157	-1.07014	1.07014	5e-05	0.0133057	T08B2.11	172314	I	T08B2.11	XLOC_002574	T08B2.11	chrI:6221286-6222875	yes	yes
WBGene00013554	1.30906	-1.30906	0.000160253	0.0291684	-1.23993	1.23993	0.0001	0.023418	Y75B8A.19	190706	III	Y75B8A.19	XLOC_010065	Y75B8A.19	chrIII:12226566-12232017	yes	yes
WBGene00003467	0.706762	-0.706762	0.000769207	0.0966047	-0.784082	0.784082	0.0001	0.023418	msp-81	177827	IV	K07F5.1	XLOC_021483	msp-81	chrIV:9836013-9836397	no	yes
WBGene00016138	1.15462	-1.15462	0.00114279	0.1293	-1.24777	1.24777	0.0001	0.023418	flh-2	175670	III	C26E6.2	XLOC_009045	flh-2	chrIII:4952094-4954593	no	yes
WBGene00000723	-1.38163	1.38163	0.00231667	0.203462	1.36673	-1.36673	0.0001	0.023418	col-150	181814	V	B0024.2	XLOC_031154	col-150	chrV:10293608-10294581	no	no
WBGene00000989	1.01581	-1.01581	0.00463635	0.311333	-1.10535	1.10535	0.0002	0.0433667	dhs-26	180624	X	ZK816.5	XLOC_036234	dhs-26	chrX:3360757-3362332	no	no
WBGene00001169	-0.383385	0.383385	0.059946	0.999353	0.868792	-0.868792	5e-05	0.0133057	eef-1A.2	181044	X	R03G5.1a	XLOC_034270	eef-1A.2	chrX:7823625-7825216	no	no
WBGene00009561	-0.204258	0.204258	0.805425	0.999353	5.80768	-5.80768	5e-05	0.0133057	F39D8.3	181632	X	F39D8.3a	XLOC_035485	F39D8.3	chrX:15421001-15424738	no	no
WBGene00004892	-0.115751	0.115751	0.462884	0.999353	0.79146	-0.79146	0.0002	0.0433667	sms-1	178072	IV	H21P03.3a	XLOC_021796	sms-1	chrIV:11483138-11498145	no	yes
WBGene00011434	1.65526	-1.65526	5.89343e-19	2.46718e-15	0	0	1	1	T04D3.5	173201	I	T04D3.5	XLOC_003585	T04D3.5	chrI:13143189-14566044	no	yes
WBGene00022175	3.14789	-3.14789	3.69964e-15	6.63769e-12	-3.06995	3.06995	0.0685	0.855466	Y71H2AM.10	175386	III	Y71H2AM.10	XLOC_010519	Y71H2AM.10	chrIII:2418503-2779010	no	yes
WBGene00044213	-1.72054	1.72054	8.6747e-10	6.40856e-07	1.12327	-1.12327	0.00075	0.120298	Y102A5C.36	3565987	V	Y102A5C.36	XLOC_032502	Y102A5C.36	chrV:16926962-16927247	no	no
WBGene00000666	-3.5384	3.5384	7.7704e-10	6.09927e-07	3.94514	-3.94514	0.0467	0.782275	col-91	184269	III	F09G8.6	XLOC_011285	col-91	chrIII:8258273-8265617	no	yes
WBGene00021625	-3.27946	3.27946	2.5101e-06	0.000718905	3.20863	-3.20863	0.0006	0.104857	Y47D7A.13	178841	V	Y47D7A.13	XLOC_030102	Y47D7A.13	chrV:4434977-4435913	no	no
WBGene00004945	1.00852	-1.00852	3.71147e-08	1.86449e-05	-1.00112	1.00112	0.3688	0.999956	sop-2	174874	II	C50E10.4a	XLOC_005792	sop-2	chrII:11948521-12404254	no	yes
WBGene00014031	1.38611	-1.38611	2.9331e-07	0.000102325	-1.53303	1.53303	0.0493	0.801741	ZK637.14	176251	III	ZK637.14	XLOC_011408	ZK637.14	chrIII:8887677-8889872	no	yes
WBGene00001555	3.13173	-3.13173	2.77088e-08	1.44998e-05	0	0	1	1	gcy-35	173202	I	T04D3.4a	XLOC_001726	gcy-35	chrI:13143189-14566044	no	yes
WBGene00019153	-0.792789	0.792789	1.87908e-05	0.00491654	0.761491	-0.761491	0.00145	0.16325	H04M03.3	177359	IV	H04M03.3	XLOC_013281	H04M03.3	chrIV:5891582-5893201	no	no
WBGene00017934	0.923933	-0.923933	7.09991e-08	2.87638e-05	-0.947509	0.947509	0.5182	0.999956	F30B5.4	177185	IV	F30B5.4a	XLOC_012490	F30B5.4	chrIV:1956724-4526957	no	yes
WBGene00006805	0.87751	-0.87751	0.000167622	0.0296502	-1.03076	1.03076	0.00025	0.0513553	unc-73	171988	I	F55C7.7a	XLOC_002239	unc-73	chrI:3999350-4031629	no	no
WBGene00000727	-2.31894	2.31894	1.16649e-05	0.00311701	3.01362	-3.01362	0.00465	0.331993	col-154	186300	V	F55C10.2	XLOC_027897	col-154	chrV:11385358-11386325	no	no
WBGene00000224	0.764395	-0.764395	0.000134559	0.0257046	-0.788292	0.788292	0.0006	0.104857	atgp-1	178504	IV	F26D10.9a	XLOC_019046	atgp-1	chrIV:17269305-17272022	no	yes
WBGene00000443	1.53545	-1.53545	5.857e-07	0.000198805	-1.94799	1.94799	0.14095	0.958968	ceh-20	3565545	III	F31E3.1	XLOC_009345	ceh-20	chrIII:6968121-7030621	no	yes
WBGene00000742	-1.41827	1.41827	6.56485e-05	0.0149905	1.32893	-1.32893	0.0013	0.161933	col-169	180909	X	T10E10.5	XLOC_033991	col-169	chrX:6329123-6330026	no	no
WBGene00007752	0.800325	-0.800325	0.000300752	0.0484249	-0.793449	0.793449	0.00035	0.0694602	wdfy-3	178220	IV	C26H9A.2a	XLOC_014887	wdfy-3	chrIV:12653465-12674367	no	no
WBGene00002055	-0.810978	0.810978	0.000170686	0.0297729	0.815293	-0.815293	0.00065	0.110302	ifc-1	178747	V	F37B4.2	XLOC_026455	ifc-1	chrV:2881392-2883576	no	no
WBGene00021387	1.36609	-1.36609	0.000118934	0.0244868	-1.26063	1.26063	0.00105	0.148126	Y37F4.6	259399	I	Y37F4.6a	XLOC_003296	Y37F4.6	chrI:10870234-10875006	no	no
WBGene00000718	-2.69031	2.69031	0.000166425	0.0296502	2.53307	-2.53307	0.00095	0.14261	col-145	179297	V	B0222.7	XLOC_030949	col-145	chrV:9162027-9162966	no	no
WBGene00011436	-0.674121	0.674121	7.8238e-05	0.0172384	0.673032	-0.673032	0.00215	0.209786	T04F3.1	179608	V	T04F3.1a	XLOC_027996	T04F3.1	chrV:11740211-11754007	no	no
WBGene00003915	1.02717	-1.02717	4.6574e-05	0.0108319	-0.925523	0.925523	0.0045	0.32727	pan-1	175596	III	M88.6a	XLOC_008960	pan-1	chrIII:4562720-4565847	no	yes
WBGene00001908	1.09637	-1.09637	2.82917e-07	0.000101519	0	0	1	1	his-34	191679	IV	F17E9.9	XLOC_014118	his-34	chrIV:8335958-8336327	no	no
WBGene00013895	-0.815647	0.815647	0.000316586	0.0497001	0.817503	-0.817503	0.00105	0.148126	ZC434.9	172908	I	ZC434.9a	XLOC_001291	ZC434.9	chrI:10356301-10360592	no	no
WBGene00000616	-1.51942	1.51942	9.3503e-07	0.000301104	1.48064	-1.48064	0.3635	0.999956	col-39	174651	II	C09G5.4	XLOC_005538	col-39	chrII:10702589-10714236	no	yes
WBGene00000735	-1.83977	1.83977	0.000201411	0.0332832	1.90792	-1.90792	0.0018	0.18818	col-162	179825	V	Y2H9A.3	XLOC_028321	col-162	chrV:13441952-13443357	no	yes
WBGene00003589	0.676998	-0.676998	9.16509e-05	0.0195092	-0.636594	0.636594	0.0044	0.324023	nex-2	176446	III	T07C4.9a	XLOC_011649	nex-2	chrIII:10326021-10330318	no	yes
WBGene00000700	-2.60773	2.60773	2.24119e-06	0.000670169	0	0	1	1	col-126	178034	IV	F54D1.2	XLOC_014627	col-126	chrIV:11263378-11264309	no	yes
WBGene00015061	-0.651947	0.651947	0.000191816	0.0321203	0.435434	-0.435434	0.14245	0.959842	cpna-2	174250	II	B0228.4a	XLOC_005059	cpna-2	chrII:7724849-7752375	no	no
WBGene00016523	-0.947547	0.947547	8.43793e-05	0.018271	0.883901	-0.883901	0.57665	0.999956	C39B5.5	183324	III	C39B5.5	XLOC_008679	C39B5.5	chrIII:1545026-2217085	no	yes
WBGene00017499	-1.27828	1.27828	7.56587e-05	0.0169678	0	0	1	1	pud-1.1	178714	V	F15E11.13	XLOC_026388	pud-1.1	chrV:1743375-2713617	no	no
WBGene00018099	-0.873763	0.873763	0.000189253	0.0321193	0.836948	-0.836948	0.57745	0.999956	ztf-28	185364	V	F36F12.8	XLOC_026340	ztf-28	chrV:1743375-2713617	no	no
WBGene00001887	0.880806	-0.880806	0.000155336	0.0286893	0	0	1	1	his-13	191672	II	ZK131.7	XLOC_005956	his-13	chrII:13507760-13903274	no	no
WBGene00001175	1.0559	-1.0559	0.000621011	0.0820976	-1.05621	1.05621	0.0005	0.0929286	egl-6	183513	X	C46F4.1a	XLOC_033902	egl-6	chrX:5931125-5934332	no	no
WBGene00017574	-0.94211	0.94211	0.00040069	0.0606296	0.953079	-0.953079	0.0008	0.124896	F18F11.1	184650	IV	F18F11.1	XLOC_019129	F18F11.1	chrIV:334889-337161	no	no
WBGene00013847	-0.748172	0.748172	0.000618446	0.0820976	0.801507	-0.801507	0.00065	0.110302	cls-3	176298	III	ZC84.3	XLOC_011459	cls-3	chrIII:9185998-9192673	no	no
WBGene00023490	0.940314	-0.940314	0.00146945	0.145314	-1.02657	1.02657	0.0004	0.0767803	F36A2.14	3565250	I	F36A2.14	XLOC_002949	F36A2.14	chrI:8824424-8825468	no	yes
WBGene00003435	0.610596	-0.610596	0.00188473	0.175335	-0.751761	0.751761	0.0004	0.0767803	msp-40	173830	II	C33F10.9	XLOC_004488	msp-40	chrII:4825408-4825792	no	yes
WBGene00001910	1.03589	-1.03589	0.00110211	0.127574	-1.05508	1.05508	0.00075	0.120298	C50F4.6	3565041	V	C50F4.6	XLOC_027529	C50F4.6	chrV:9546391-9546722	no	yes
WBGene00014220	0.972417	-0.972417	0.00406997	0.288784	-1.07353	1.07353	0.00025	0.0513553	ZK1098.3	176346	III	ZK1098.3	XLOC_011508	ZK1098.3	chrIII:9532350-9538614	no	yes
WBGene00000743	-1.20443	1.20443	0.000493043	0.0711738	1.84833	-1.84833	0.0021	0.206629	col-170	353462	X	T10E10.6	XLOC_033992	col-170	chrX:6331672-6332575	no	no
WBGene00001149	-0.669923	0.669923	0.00096696	0.117903	0.683659	-0.683659	0.00135	0.16296	bcat-1	181423	X	K02A4.1	XLOC_035087	bcat-1	chrX:12877423-12879675	no	no
WBGene00017658	-0.912857	0.912857	0.00106218	0.124672	0.874931	-0.874931	0.00125	0.15909	F21C10.9	184767	V	F21C10.9	XLOC_030936	F21C10.9	chrV:9097271-9098637	no	no
WBGene00002054	-0.807097	0.807097	0.00460122	0.311333	0.79447	-0.79447	0.0003	0.0605638	ifb-2	173973	II	F10C1.7a	XLOC_004670	ifb-2	chrII:5750179-5753958	no	no
WBGene00004728	0.664627	-0.664627	0.0012896	0.134967	-0.667171	0.667171	0.0014	0.16325	sax-2	175697	III	F21H11.2a	XLOC_009072	sax-2	chrIII:5109661-5130504	no	no
WBGene00003449	0.619052	-0.619052	0.00174909	0.166416	-0.801279	0.801279	0.00115	0.154774	msp-56	177830	IV	K07F5.3	XLOC_014362	msp-56	chrIV:9841519-9841903	no	yes
WBGene00020579	-0.8645	0.8645	0.00127749	0.134823	0.898434	-0.898434	0.00165	0.175635	T19D12.4	174096	II	T19D12.4a	XLOC_004859	T19D12.4	chrII:6631134-6636951	no	no
WBGene00003685	0.970276	-0.970276	0.00179657	0.168382	-0.964757	0.964757	0.0012	0.15612	nhr-95	180254	V	Y39B6A.17a	XLOC_032783	nhr-95	chrV:19076638-19082539	no	no
WBGene00015752	0.729911	-0.729911	0.00126577	0.134718	-0.721204	0.721204	0.0018	0.18818	C14B9.2	176147	III	C14B9.2	XLOC_009505	C14B9.2	chrIII:8133608-8136338	no	yes
WBGene00022645	-0.719272	0.719272	0.00120516	0.132379	0.697201	-0.697201	0.0021	0.206629	ZK6.11	191209	V	ZK6.11a	XLOC_029506	ZK6.11	chrV:415913-417667	no	no
WBGene00015795	1.42793	-1.42793	0.0024148	0.207137	-1.43556	1.43556	0.00115	0.154774	C15F1.2	174143	II	C15F1.2	XLOC_004928	C15F1.2	chrII:6979963-6988404	no	yes
WBGene00007751	-0.908735	0.908735	0.00251752	0.212198	0.966344	-0.966344	0.0011	0.151528	C26G2.2	182945	X	C26G2.2a	XLOC_035359	C26G2.2	chrX:14664263-14671231	no	no
WBGene00010065	-1.27389	1.27389	0.0119664	0.569239	1.33853	-1.33853	0.00025	0.0513553	F54F7.3	181361	X	F54F7.3	XLOC_037613	F54F7.3	chrX:11849391-11850056	no	no
WBGene00020018	1.05163	-1.05163	0.00254661	0.213219	-1.07848	1.07848	0.0012	0.15612	R12B2.2	187835	III	R12B2.2	XLOC_009176	R12B2.2	chrIII:5807084-5809046	no	yes
WBGene00007610	0.877667	-0.877667	0.00215664	0.194858	-0.912951	0.912951	0.0015	0.167271	C15H7.3	182639	III	C15H7.3	XLOC_011535	C15H7.3	chrIII:9650369-9651679	no	yes
WBGene00000653	-1.44392	1.44392	0.0026815	0.22128	1.27964	-1.27964	0.0013	0.161933	col-77	174336	II	M195.1	XLOC_007493	col-77	chrII:8358250-8359295	no	no
WBGene00018522	-0.577696	0.577696	0.000596374	0.0805362	0.591969	-0.591969	0.00595	0.374562	F46H5.7	180987	X	F46H5.7a	XLOC_036897	F46H5.7	chrX:7238965-7242747	no	no
WBGene00017962	-0.828773	0.828773	0.00242449	0.207137	0.788167	-0.788167	0.00165	0.175635	fbxa-72	185173	V	F31F4.15a	XLOC_029549	fbxa-72	chrV:675003-676754	no	no
WBGene00022834	0.82976	-0.82976	0.00298328	0.237133	-0.881867	0.881867	0.0014	0.16325	ZK973.8	191480	I	ZK973.8	XLOC_002285	ZK973.8	chrI:4364951-4366950	no	yes
WBGene00000138	-1.22527	1.22527	0.00285507	0.228388	1.18454	-1.18454	0.00145	0.16325	amx-2	173146	I	B0019.1	XLOC_003536	amx-2	chrI:12759745-12764938	no	yes
WBGene00004311	-0.832912	0.832912	0.00051155	0.0730064	0.679259	-0.679259	0.00845	0.437792	ras-2	175625	III	F17C8.4	XLOC_010763	ras-2	chrIII:4737683-4740030	no	no
WBGene00009461	0.873746	-0.873746	0.00217586	0.194963	-0.899965	0.899965	0.00245	0.224118	madf-2	173019	I	F36D1.1	XLOC_003337	madf-2	chrI:11276596-11280006	no	no
WBGene00013700	0.866864	-0.866864	0.0022534	0.199299	-0.810333	0.810333	0.00255	0.229677	Y106G6D.3	190916	I	Y106G6D.3	XLOC_003188	Y106G6D.3	chrI:10112170-10114188	no	no
WBGene00001067	-2.16112	2.16112	0.00637288	0.376978	2.02958	-2.02958	0.00095	0.14261	dpy-5	172197	I	F27C1.8	XLOC_002431	dpy-5	chrI:5432199-5433054	no	yes
WBGene00022644	-0.71821	0.71821	0.00236325	0.20469	0.707401	-0.707401	0.00265	0.236861	dod-19	178564	V	ZK6.10a	XLOC_029505	dod-19	chrV:411914-414717	no	no
WBGene00001814	-0.671158	0.671158	0.00113983	0.1293	0.636843	-0.636843	0.00565	0.362724	haf-4	171639	I	W04C9.1a	XLOC_000043	haf-4	chrI:490053-496070	no	yes
WBGene00000615	0.892443	-0.892443	0.00362308	0.269244	-0.899354	0.899354	0.00185	0.191696	col-38	174370	II	F54C9.4	XLOC_007524	col-38	chrII:8568026-8569018	no	yes
WBGene00017990	0.883212	-0.883212	0.00157128	0.152974	-0.954488	0.954488	0.00495	0.338945	cec-4	177536	IV	F32E10.2	XLOC_013991	cec-4	chrIV:7574420-7578352	no	yes
WBGene00012139	0.785008	-0.785008	0.00218886	0.194963	-0.779386	0.779386	0.00365	0.290734	T28F4.4	172502	I	T28F4.4a	XLOC_002769	T28F4.4	chrI:7486796-7490163	no	yes
WBGene00004348	0.927886	-0.927886	0.00122663	0.132804	-0.79854	0.79854	0.0067	0.392251	rgs-5	175794	III	B0336.4a	XLOC_009155	rgs-5	chrIII:5698644-5702008	no	yes
WBGene00010595	-0.773229	0.773229	0.0024837	0.210762	0.754415	-0.754415	0.00345	0.276685	haao-1	179329	V	K06A4.5	XLOC_027521	haao-1	chrV:9505664-9506959	no	no
WBGene00021709	-0.80624	0.80624	0.00822151	0.44893	1.00588	-1.00588	0.0012	0.15612	ugt-29	178581	V	Y49C4A.8a	XLOC_029552	ugt-29	chrV:696610-699141	no	no
WBGene00018772	1.00489	-1.00489	0.0043583	0.304088	-0.983895	0.983895	0.00235	0.221904	F53G12.4	186189	I	F53G12.4	XLOC_000019	F53G12.4	chrI:134353-137282	no	yes
WBGene00012480	1.10948	-1.10948	0.00970173	0.499361	-1.08055	1.08055	0.0011	0.151528	clec-104	189475	I	Y18D10A.10	XLOC_001656	clec-104	chrI:12859488-12861187	no	yes
WBGene00000644	-1.49411	1.49411	0.00135863	0.138194	1.14594	-1.14594	0.0081	0.423406	col-68	173395	II	C50D2.4	XLOC_003780	col-68	chrII:104542-105722	no	yes
WBGene00003851	-0.512929	0.512929	0.00102854	0.123024	0.525425	-0.525425	0.01145	0.511453	odr-4	175950	III	Y102E9.1a	XLOC_009306	odr-4	chrIII:6731178-6733791	no	yes
WBGene00008994	-2.0992	2.0992	0.00397174	0.283415	2.20561	-2.20561	0.00305	0.255089	F21A3.4	184749	V	F21A3.4	XLOC_028712	F21A3.4	chrV:15536646-15537967	no	yes
WBGene00003470	0.529401	-0.529401	0.00443587	0.307791	-0.65837	0.65837	0.00275	0.238517	msp-152	191712	II	ZK546.6	XLOC_004507	msp-152	chrII:4933020-4933404	no	yes
WBGene00009982	-0.828437	0.828437	0.00534676	0.342602	1.09254	-1.09254	0.0028	0.239308	F53F1.4	179822	V	F53F1.4	XLOC_028317	F53F1.4	chrV:13411096-13411524	no	yes
WBGene00001859	1.04699	-1.04699	0.00195382	0.180427	-1.11372	1.11372	0.00765	0.410889	hil-8	188129	I	T05E8.2	XLOC_002437	hil-8	chrI:5465952-5469630	no	yes
WBGene00015128	-0.663789	0.663789	0.00200977	0.184238	0.649153	-0.649153	0.00765	0.410889	B0303.7	176220	III	B0303.7a	XLOC_009608	B0303.7	chrIII:8693573-8699115	no	yes
WBGene00012428	-0.627993	0.627993	0.010821	0.537694	0.680157	-0.680157	0.00145	0.16325	Y11D7A.3	177745	IV	Y11D7A.3a	XLOC_014261	Y11D7A.3	chrIV:9233084-9241200	no	no
WBGene00018350	-0.754067	0.754067	0.00677665	0.388768	0.791769	-0.791769	0.00285	0.241816	ifo-1	177505	IV	F42C5.10	XLOC_021045	ifo-1	chrIV:7320879-7326651	no	yes
WBGene00003402	-1.0834	1.0834	0.00605761	0.371309	1.14045	-1.14045	0.00315	0.261584	mpk-2	173880	II	C04G6.1a	XLOC_004540	mpk-2	chrII:5104454-5108800	no	yes
WBGene00003438	0.582176	-0.582176	0.00309696	0.243092	-0.598548	0.598548	0.00625	0.379177	msp-45	173884	II	F58A6.8	XLOC_006902	msp-45	chrII:5155425-5157615	no	no
WBGene00001911	0.672686	-0.672686	0.000999043	0.120644	-0.551881	0.551881	0.0198	0.610101	his-37	179341	V	C50F4.7	XLOC_027530	his-37	chrV:9547109-9547495	no	yes
WBGene00003813	-0.57388	0.57388	0.00276857	0.223955	0.574228	-0.574228	0.0078	0.415137	nrf-6	174287	II	C08B11.4	XLOC_007443	nrf-6	chrII:8029000-8032651	no	yes
WBGene00003457	0.587519	-0.587519	0.00233961	0.20405	-0.56787	0.56787	0.0094	0.462456	msp-64	173983	II	ZK1248.6	XLOC_007028	msp-64	chrII:5809926-5810310	no	yes
WBGene00018380	-1.07573	1.07573	0.00502109	0.331894	0.886578	-0.886578	0.0044	0.324023	decr-1.1	185697	II	F43C11.3	XLOC_004103	decr-1.1	chrII:2353342-2385600	no	no
WBGene00018238	0.752448	-0.752448	0.00465429	0.311333	-0.838636	0.838636	0.00495	0.338945	F40F4.7	180614	X	F40F4.7	XLOC_036207	F40F4.7	chrX:3244253-3245755	no	no
WBGene00014166	0.645309	-0.645309	0.00631527	0.376978	-0.766821	0.766821	0.0037	0.292725	ZK945.4	174573	II	ZK945.4	XLOC_007805	ZK945.4	chrII:10103053-10105637	no	yes
WBGene00007521	-0.977946	0.977946	0.011576	0.559164	1.02255	-1.02255	0.00205	0.205158	C11E4.7	182517	X	C11E4.7a	XLOC_034559	C11E4.7	chrX:9617189-9619036	no	yes
WBGene00003465	0.510004	-0.510004	0.00554317	0.351599	-0.650474	0.650474	0.00475	0.33304	msp-78	177814	IV	T13F2.11	XLOC_014352	msp-78	chrIV:9770025-9770409	no	no
WBGene00007297	0.522665	-0.522665	0.00269575	0.22128	-0.543354	0.543354	0.0105	0.488261	C04F12.1	172816	I	C04F12.1	XLOC_003114	C04F12.1	chrI:9673848-9678489	no	yes
WBGene00016303	-0.555574	0.555574	0.00176624	0.166783	0.530299	-0.530299	0.0163	0.58545	fbxc-32	173476	II	C32B5.10	XLOC_006262	fbxc-32	chrII:946566-948188	no	no
WBGene00001663	0.991999	-0.991999	0.00494182	0.328382	-1.02194	1.02194	0.00605	0.377018	gpa-1	179546	V	T19C4.6a	XLOC_031378	gpa-1	chrV:11174548-11177541	no	yes
WBGene00006606	0.561819	-0.561819	0.00170786	0.163733	-0.530385	0.530385	0.01805	0.596617	tra-3	178385	IV	LLC1.1a	XLOC_023014	tra-3	chrIV:14436651-14444122	no	no
WBGene00004922	0.689155	-0.689155	0.00388034	0.280076	-0.704501	0.704501	0.00875	0.447396	snt-2	185680	III	F42G9.7	XLOC_010316	snt-2	chrIII:786693-793497	no	yes
WBGene00000739	-1.00686	1.00686	0.00347669	0.264629	0.779848	-0.779848	0.00975	0.473704	col-166	180902	X	T07H6.3	XLOC_033982	col-166	chrX:6279638-6280885	no	no
WBGene00007642	-2.25424	2.25424	0.00278182	0.223955	2.16771	-2.16771	0.01255	0.519251	C17E4.2	172766	I	C17E4.2	XLOC_001134	C17E4.2	chrI:9412306-9413031	no	yes
WBGene00003424	0.483287	-0.483287	0.00883103	0.473711	-0.643817	0.643817	0.00395	0.306295	msp-3	173825	II	F26G1.7	XLOC_006828	msp-3	chrII:4785892-4786276	no	no
WBGene00017112	0.644827	-0.644827	0.0265736	0.831629	-0.834972	0.834972	0.00135	0.16296	E03H12.5	177262	IV	E03H12.5	XLOC_012694	E03H12.5	chrIV:4977087-4977987	no	no
WBGene00008669	-0.62242	0.62242	0.00893651	0.475178	0.595225	-0.595225	0.0044	0.324023	acs-14	179330	V	F11A3.1	XLOC_027522	acs-14	chrV:9508109-9510315	no	yes
WBGene00003762	-0.61266	0.61266	0.00322553	0.25044	0.629748	-0.629748	0.01215	0.515451	nlp-24	179594	V	F35B12.7	XLOC_027968	nlp-24	chrV:11616358-11616677	no	no
WBGene00007153	-0.554781	0.554781	0.00346019	0.264629	0.539397	-0.539397	0.01165	0.511453	clec-41	179797	V	B0365.6	XLOC_031834	clec-41	chrV:13135929-13138044	no	yes
WBGene00016201	-0.782628	0.782628	0.00606087	0.371309	0.658727	-0.658727	0.0067	0.392252	tdo-2	175836	III	C28H8.11a	XLOC_010936	tdo-2	chrIII:5917664-5919906	no	yes
WBGene00000298	-0.71207	0.71207	0.0139424	0.618736	0.718582	-0.718582	0.00295	0.2485	cat-4	179472	V	F32G8.6	XLOC_027708	cat-4	chrV:10564890-10566234	no	no
WBGene00008304	-1.83792	1.83792	0.00900304	0.475178	1.82197	-1.82197	0.0046	0.331993	C54D10.10	183787	V	C54D10.10	XLOC_031691	C54D10.10	chrV:12448683-12449978	no	no
WBGene00219725	1.35022	-1.35022	0.0233817	0.776852	-1.47203	1.47203	0.0019	0.19515	linc-63	NA	I		XLOC_002215	linc-63	chrI:3870644-3871270	no	yes
WBGene00009813	-0.587073	0.587073	0.00676338	0.388768	0.61223	-0.61223	0.00665	0.392251	haly-1	181279	X	F47B10.2	XLOC_037453	haly-1	chrX:10893623-10896260	no	no
WBGene00010435	0.581312	-0.581312	0.0169495	0.682273	-0.638965	0.638965	0.0028	0.239308	JC8.2	178277	IV	JC8.2	XLOC_022076	JC8.2	chrIV:13233111-13236556	no	yes
WBGene00022856	-0.500367	0.500367	0.00391737	0.281133	0.508088	-0.508088	0.01205	0.51494	cth-2	174155	II	ZK1127.10	XLOC_007281	cth-2	chrII:7056273-7057901	no	yes
WBGene00007242	1.05604	-1.05604	0.00936673	0.486102	-1.06524	1.06524	0.0051	0.341234	madf-5	175118	II	C01G12.1	XLOC_006050	madf-5	chrII:14573570-14576050	no	yes
WBGene00000973	0.573615	-0.573615	0.00772716	0.425638	-0.635578	0.635578	0.00635	0.381293	dhs-9	175737	III	Y32H12A.3	XLOC_010864	dhs-9	chrIII:5364540-5368001	no	yes
WBGene00015949	-1.25337	1.25337	0.0207416	0.749801	1.33287	-1.33287	0.00235	0.221904	C18A11.3	181063	X	C18A11.3	XLOC_034307	C18A11.3	chrX:8061080-8065544	no	no
WBGene00000711	-1.60482	1.60482	0.012172	0.572539	1.38094	-1.38094	0.0041	0.315835	col-138	183722	IV	C52D10.13	XLOC_025938	col-138	chrIV:17182847-17183693	no	yes
WBGene00003429	0.531585	-0.531585	0.00323045	0.25044	-0.639841	0.639841	0.0171	0.595904	msp-31	173849	II	R05F9.13	XLOC_006855	msp-31	chrII:4914602-4925238	no	yes
WBGene00007097	-2.23091	2.23091	0.00772464	0.425638	2.22834	-2.22834	0.00715	0.408126	B0024.4	179432	V	B0024.4	XLOC_027658	B0024.4	chrV:10297406-10298813	no	no
WBGene00009453	-0.587655	0.587655	0.00599821	0.371091	0.595367	-0.595367	0.0093	0.461414	F36A2.3	172690	I	F36A2.3	XLOC_001055	F36A2.3	chrI:8798809-8801580	no	yes
WBGene00003426	0.485961	-0.485961	0.0104112	0.525119	-0.632283	0.632283	0.00545	0.358506	msp-19	177305	IV	F36H12.7	XLOC_012855	msp-19	chrIV:5260580-5260964	no	yes
WBGene00017386	0.653423	-0.653423	0.00466045	0.311333	-0.722006	0.722006	0.01255	0.519251	nspd-5	173837	II	F11G11.8	XLOC_006842	nspd-5	chrII:4860140-4860356	no	yes
WBGene00007976	0.710643	-0.710643	0.00850081	0.462172	-0.707102	0.707102	0.0071	0.407519	C36B1.9	183252	I	C36B1.9	XLOC_002936	C36B1.9	chrI:8743842-8746919	no	yes
WBGene00012443	-0.708022	0.708022	0.0249315	0.809082	0.685612	-0.685612	0.0025	0.226919	Y15E3A.4	181623	X	Y15E3A.4	XLOC_035474	Y15E3A.4	chrX:15330925-15333624	no	no
WBGene00022236	-1.29942	1.29942	0.0135561	0.610218	1.48581	-1.48581	0.0047	0.33304	Y73B6BL.12	190648	IV	Y73B6BL.12	XLOC_020720	Y73B6BL.12	chrIV:6317035-6317446	no	yes
WBGene00007549	-0.662725	0.662725	0.00700265	0.397947	0.669928	-0.669928	0.00915	0.455904	spin-1	179662	V	C13C4.5	XLOC_028079	spin-1	chrV:12114981-12117278	no	no
WBGene00220066	0.545986	-0.545986	0.0258196	0.829332	-0.695416	0.695416	0.00245	0.224118	T09B9.10	NA	X		XLOC_037295	T09B9.10	chrX:9754543-9754685	no	no
WBGene00002271	-0.825486	0.825486	0.0127754	0.587714	0.753161	-0.753161	0.00495	0.338945	lec-8	181198	X	R07B1.10	XLOC_034586	lec-8	chrX:9850548-9851203	no	no
WBGene00001072	0.865591	-0.865591	0.023534	0.779851	-0.991494	0.991494	0.00275	0.238517	dpy-10	36805042	II	T14B4.7	XLOC_007215	dpy-10	chrII:6710329-6711832	no	no
WBGene00003431	0.515417	-0.515417	0.00911566	0.479011	-0.593339	0.593339	0.00725	0.408126	msp-33	173844	II	R05F9.8	XLOC_006848	msp-33	chrII:4891582-4893480	no	yes
WBGene00000281	-0.6869	0.6869	0.0103935	0.525119	0.682051	-0.682051	0.00635	0.381293	cah-3	181713	X	K05G3.3	XLOC_035637	cah-3	chrX:16487460-16489038	no	no
WBGene00020070	0.483066	-0.483066	0.0407652	0.966637	-1.11249	1.11249	0.00165	0.175635	rmd-6	177278	IV	R13H9.1	XLOC_012749	rmd-6	chrIV:5068915-5069747	no	yes
WBGene00002057	-1.05978	1.05978	0.0126271	0.587347	0.957323	-0.957323	0.0054	0.357224	ifd-1	187585	X	R04E5.10a	XLOC_037179	ifd-1	chrX:8820838-8824385	no	yes
WBGene00001819	-0.571583	0.571583	0.0110288	0.543182	0.616366	-0.616366	0.00615	0.377018	haf-9	172288	I	ZK484.2a	XLOC_000660	haf-9	chrI:6081817-6085834	no	yes
WBGene00010045	1.28247	-1.28247	0.0454805	0.999353	-2.14797	2.14797	0.00155	0.169616	F54C9.11	186226	II	F54C9.11	XLOC_007526	F54C9.11	chrII:8583053-8584999	no	yes
WBGene00003877	-0.514972	0.514972	0.0059849	0.371091	0.552188	-0.552188	0.01285	0.520625	pept-1	180919	X	K04E7.2	XLOC_034013	pept-1	chrX:6456995-6461604	no	no
WBGene00000710	-2.97244	2.97244	0.000569522	0.078778	3.23591	-3.23591	0.13715	0.956652	col-137	190149	IV	Y51H4A.9	XLOC_025490	col-137	chrIV:15896213-16675918	no	no
WBGene00000904	0.617946	-0.617946	0.00677921	0.388768	-0.629387	0.629387	0.0117	0.511453	daf-8	187612	I	R05D11.1	XLOC_002910	daf-8	chrI:8584549-8587483	no	yes
WBGene00002127	-0.626733	0.626733	0.00931817	0.485589	0.643673	-0.643673	0.00865	0.444223	inx-5	181086	X	R09F10.4	XLOC_037087	inx-5	chrX:8300310-8302323	no	no
WBGene00220233	0.679931	-0.679931	0.114882	0.999353	-1.71242	1.71242	0.0007	0.115441	ZC395.12	NA	III		XLOC_010854	ZC395.12	chrIII:5267153-5267275	no	no
WBGene00013696	0.589133	-0.589133	0.0045172	0.311333	-0.57849	0.57849	0.0182	0.596617	Y106G6A.4	172848	I	Y106G6A.4	XLOC_001232	Y106G6A.4	chrI:9931004-9931829	no	yes
WBGene00015507	0.648709	-0.648709	0.0210567	0.749801	-0.84887	0.84887	0.00395	0.306295	C06A6.2	177573	IV	C06A6.2a	XLOC_014031	C06A6.2	chrIV:7846629-7853909	no	no
WBGene00009682	0.485735	-0.485735	0.00524415	0.340047	-0.521885	0.521885	0.01625	0.58545	msd-2	260109	IV	F44D12.5	XLOC_014408	msd-2	chrIV:10029061-10029391	no	yes
WBGene00000649	-2.29822	2.29822	0.0111969	0.548023	2.37267	-2.37267	0.0076	0.410889	col-73	184366	II	F11G11.12	XLOC_006846	col-73	chrII:4872211-4873121	no	no
WBGene00045391	-0.973405	0.973405	0.123612	0.999353	0.854796	-0.854796	0.0007	0.115441	F52D4.1	NA	IV		XLOC_015136	F52D4.1	chrIV:13709245-13709404	no	yes
WBGene00016422	-0.962187	0.962187	0.0208907	0.749801	1.08277	-1.08277	0.00415	0.317276	noah-1	172261	I	C34G6.6a	XLOC_002510	noah-1	chrI:5874974-5878892	no	yes
WBGene00015676	-0.518891	0.518891	0.00644413	0.376978	0.50243	-0.50243	0.01355	0.539649	mct-6	181724	X	C10E2.6	XLOC_038329	mct-6	chrX:16767889-16770422	no	no
WBGene00020921	-0.634544	0.634544	0.00354522	0.268219	0.593864	-0.593864	0.0249	0.660609	W01C8.5	180836	X	W01C8.5a	XLOC_036600	W01C8.5	chrX:5694797-5697264	no	no
WBGene00000663	-2.86076	2.86076	0.00860748	0.465954	2.78517	-2.78517	0.0103	0.484348	col-88	175170	III	W05G11.3	XLOC_008468	col-88	chrIII:41061-41970	no	no
WBGene00003434	0.558979	-0.558979	0.00756945	0.42251	-0.631278	0.631278	0.01195	0.512537	msp-38	177887	IV	K08F4.8	XLOC_021559	msp-38	chrIV:10143334-10143718	no	yes
WBGene00011222	-0.622283	0.622283	0.00358661	0.269239	0.601109	-0.601109	0.0258	0.662483	R10H10.3	177930	IV	R10H10.3	XLOC_014474	R10H10.3	chrIV:10388498-10393215	no	no
WBGene00008125	1.98916	-1.98916	0.00945959	0.488901	-2.39245	2.39245	0.00995	0.479443	C47A4.5	183526	IV	C47A4.5	XLOC_015187	C47A4.5	chrIV:13745684-13745912	no	no
WBGene00002216	-0.669992	0.669992	0.00727457	0.411537	1.01683	-1.01683	0.01295	0.521071	klp-3	191697	II	T09A5.2a	XLOC_005088	klp-3	chrII:7842364-7845331	no	no
WBGene00003091	-0.692836	0.692836	0.0150838	0.647978	0.676116	-0.676116	0.00655	0.389309	lys-2	179429	V	Y22F5A.5	XLOC_031151	lys-2	chrV:10280342-10281419	no	no
WBGene00011016	0.539991	-0.539991	0.0313764	0.87959	-0.647733	0.647733	0.00325	0.266114	R04F11.3	179688	V	R04F11.3	XLOC_031647	R04F11.3	chrV:12315105-12317161	no	yes
WBGene00004860	0.72084	-0.72084	0.0212532	0.749801	-0.857233	0.857233	0.00475	0.33304	sma-6	174044	II	C32D5.2	XLOC_004789	sma-6	chrII:6324456-6327108	no	yes
WBGene00000630	1.58957	-1.58957	0.0267901	0.831629	-2.22533	2.22533	0.0038	0.298619	col-53	172222	I	M01A12.1	XLOC_000601	col-53	chrI:5644739-5646317	no	no
WBGene00019298	-0.600759	0.600759	0.0113634	0.551013	0.599475	-0.599475	0.0091	0.455904	K02D7.1	176851	IV	K02D7.1a	XLOC_019124	K02D7.1	chrIV:292645-298280	no	yes
WBGene00001778	-1.4123	1.4123	0.0185841	0.719324	1.42044	-1.42044	0.0056	0.362267	gst-30	191347	II	ZK546.11	XLOC_006857	gst-30	chrII:4933930-4935010	no	yes
WBGene00003515	-0.485362	0.485362	0.0062249	0.376978	0.481934	-0.481934	0.0169	0.594241	myo-3	179676	V	K12F2.1	XLOC_031633	myo-3	chrV:12226948-12234281	no	no
WBGene00008959	0.550202	-0.550202	0.00752679	0.422004	-0.565699	0.565699	0.01445	0.554738	F19H6.4	184699	X	F19H6.4	XLOC_035018	F19H6.4	chrX:12365619-12367047	no	yes
WBGene00009665	0.594291	-0.594291	0.022827	0.768589	-0.763041	0.763041	0.00495	0.338945	lmd-1	185715	I	F43G9.2a	XLOC_001025	lmd-1	chrI:8609924-8610770	no	yes
WBGene00003425	0.551493	-0.551493	0.00630697	0.376978	-0.615836	0.615836	0.0181	0.596617	msp-10	177828	IV	K07F5.2	XLOC_014361	msp-10	chrIV:9837628-9838012	no	yes
WBGene00018223	-1.5609	1.5609	0.000537269	0.0758153	1.77617	-1.77617	0.2162	0.999956	bath-13	185510	II	F40B1.1	XLOC_006513	bath-13	chrII:2443296-4279128	no	yes
WBGene00003637	0.645139	-0.645139	0.0068581	0.391504	-0.641917	0.641917	0.01725	0.596617	nhr-47	178933	V	C24G6.4	XLOC_026804	nhr-47	chrV:5505436-5509819	no	yes
WBGene00009959	0.525764	-0.525764	0.00525274	0.340047	-0.506407	0.506407	0.0227	0.646553	F53B6.4	172709	I	F53B6.4a	XLOC_002966	F53B6.4	chrI:8947401-8948704	no	yes
WBGene00022798	0.526861	-0.526861	0.0120565	0.569239	-0.549941	0.549941	0.0101	0.480735	fahd-1	176109	III	ZK688.3	XLOC_009464	fahd-1	chrIII:7893705-7894442	no	yes
WBGene00007236	-0.587568	0.587568	0.0199849	0.749184	0.717769	-0.717769	0.0068	0.394164	C01G10.9	180016	V	C01G10.9	XLOC_028620	C01G10.9	chrV:15082769-15084024	no	yes
WBGene00011172	0.855544	-0.855544	0.0208156	0.749801	-0.93735	0.93735	0.00655	0.389309	R09E10.2	177919	IV	R09E10.2	XLOC_021592	R09E10.2	chrIV:10317587-10318230	no	yes
WBGene00004300	-1.16925	1.16925	0.000381694	0.0584597	1.20665	-1.20665	0.35155	0.999956	ram-2	174687	II	F38A3.2	XLOC_007939	ram-2	chrII:10968325-11503888	no	yes
WBGene00009115	0.802294	-0.802294	0.0218252	0.749801	-0.86295	0.86295	0.00615	0.377018	F25F2.1	175589	III	F25F2.1a	XLOC_008950	F25F2.1	chrIII:4508944-4512095	no	yes
WBGene00002273	-0.614159	0.614159	0.0179044	0.704894	0.623728	-0.623728	0.00765	0.410889	lec-10	179034	V	W01A11.4	XLOC_030428	lec-10	chrV:6488300-6488994	no	no
WBGene00045355	0.592516	-0.592516	0.00660738	0.384176	-0.563149	0.563149	0.0205	0.614944	D1086.17	6418749	V	D1086.17	XLOC_028442	D1086.17	chrV:14068690-14071160	no	no
WBGene00009812	-0.454164	0.454164	0.00414571	0.290871	0.424336	-0.424336	0.03395	0.709195	suca-1	181280	X	F47B10.1	XLOC_037454	suca-1	chrX:10897961-10900041	no	no
WBGene00018925	-0.471706	0.471706	0.00591494	0.371091	0.479724	-0.479724	0.0239	0.650651	F56A11.5	176883	IV	F56A11.5a	XLOC_019156	F56A11.5	chrIV:568473-570834	no	no
WBGene00016807	1.1177	-1.1177	0.030995	0.876725	-1.49083	1.49083	0.00465	0.331993	C50D2.3	183651	II	C50D2.3	XLOC_003781	C50D2.3	chrII:106257-107438	no	yes
WBGene00012703	1.07853	-1.07853	0.0288718	0.857213	-1.14378	1.14378	0.00505	0.33983	nhr-145	180255	V	Y39B6A.47a	XLOC_029251	nhr-145	chrV:19087694-19092606	no	no
WBGene00008298	1.02267	-1.02267	0.106255	0.999353	-1.38471	1.38471	0.0014	0.16325	C54D10.3	179704	V	C54D10.3	XLOC_028147	C54D10.3	chrV:12418582-12419304	no	no
WBGene00015551	-0.56987	0.56987	0.0365667	0.929638	0.658165	-0.658165	0.0042	0.317276	C06G3.5	177469	IV	C06G3.5a	XLOC_013875	C06G3.5	chrIV:7024231-7027990	no	no
WBGene00015552	0.517469	-0.517469	0.013515	0.610218	-0.619997	0.619997	0.01175	0.511453	C06G3.6	177467	IV	C06G3.6	XLOC_013873	C06G3.6	chrIV:7017653-7019809	no	yes
WBGene00009323	0.628246	-0.628246	0.0108318	0.537694	-0.645996	0.645996	0.0147	0.560659	best-13	185198	IV	F32B6.9	XLOC_014378	best-13	chrIV:9903890-9905700	no	yes
WBGene00000994	0.498069	-0.498069	0.0132204	0.601577	-0.531749	0.531749	0.01285	0.520625	dic-1	24104403	IV	F08B4.1a	XLOC_014174	dic-1	chrIV:8692116-8696121	no	yes
WBGene00010212	-0.866326	0.866326	0.000750189	0.0951679	0.792339	-0.792339	0.23285	0.999956	fbxa-192	186462	V	F57G4.8	XLOC_032603	fbxa-192	chrV:17555827-17726691	no	yes
WBGene00019270	-1.27974	1.27974	0.0339809	0.910566	1.40741	-1.40741	0.00525	0.349274	H41C03.3	173993	II	H41C03.3	XLOC_004691	H41C03.3	chrII:5847725-5850195	no	yes
WBGene00016336	-1.01251	1.01251	0.0170981	0.682966	1.02394	-1.02394	0.0108	0.493973	C33C12.4	173573	II	C33C12.4	XLOC_006458	C33C12.4	chrII:2165494-2170217	no	no
WBGene00008655	3.16496	-3.16496	0.0021382	0.194592	-5.10944	5.10944	0.08775	0.886495	lips-3	184306	III	F10F2.3	XLOC_008972	lips-3	chrIII:4616773-4618740	no	yes
WBGene00015647	0.885981	-0.885981	0.0210195	0.749801	-0.903948	0.903948	0.0089	0.453087	C09F5.1	175222	III	C09F5.1a	XLOC_008523	C09F5.1	chrIII:658722-662510	no	no
WBGene00020267	1.44272	-1.44272	0.0278201	0.842894	-1.59927	1.59927	0.0072	0.408126	T05H4.4	188150	V	T05H4.4	XLOC_026975	T05H4.4	chrV:6438918-6440019	no	yes
WBGene00004111	0.763468	-0.763468	0.000359018	0.0556655	-0.752876	0.752876	0.56435	0.999956	pqn-21	172398	I	C37A2.5a	XLOC_002658	pqn-21	chrI:6554901-6936826	no	yes
WBGene00077593	-1.57928	1.57928	0.0352363	0.924679	1.61282	-1.61282	0.0059	0.373422	C49G7.12	6418710	V	C49G7.12a	XLOC_026620	C49G7.12	chrV:4038812-4039854	no	no
WBGene00000748	-2.50756	2.50756	0.0203029	0.749801	2.56207	-2.56207	0.01055	0.488261	col-175	24104282	X	C35B8.1	XLOC_037231	col-175	chrX:9233619-9234541	no	yes
WBGene00012710	0.705744	-0.705744	0.0949958	0.999353	-1.29098	1.29098	0.00225	0.215945	Y39C12A.9	178172	IV	Y39C12A.9	XLOC_021946	Y39C12A.9	chrIV:12257700-12259170	no	no
WBGene00011975	0.591435	-0.591435	0.0159978	0.660908	-0.557722	0.557722	0.01385	0.542373	T24B1.1	172527	I	T24B1.1	XLOC_000908	T24B1.1	chrI:7676677-7678789	no	yes
WBGene00219313	0.681487	-0.681487	0.0319015	0.890335	-0.724206	0.724206	0.0069	0.397991	C17E4.20	13181457	I	C17E4.20	XLOC_001135	C17E4.20	chrI:9414569-9416498	no	yes
WBGene00009048	-1.15067	1.15067	0.000425202	0.0628248	1.14019	-1.14019	0.52	0.999956	cth-1	180079	V	F22B8.6a	XLOC_028812	cth-1	chrV:15699960-16443388	no	no
WBGene00001725	-2.1078	2.1078	0.0295235	0.860293	1.94372	-1.94372	0.0075	0.410889	grl-16	171649	I	Y65B4BR.6a	XLOC_001931	grl-16	chrI:572439-575069	no	no
WBGene00007026	-0.531848	0.531848	0.00900489	0.475178	0.501421	-0.501421	0.0257	0.662483	mdt-31	185213	I	F32H2.2a	XLOC_001079	mdt-31	chrI:8966122-8966955	no	yes
WBGene00022847	-0.466949	0.466949	0.305863	0.999353	1.73434	-1.73434	0.0008	0.124896	ZK1055.6	179050	V	ZK1055.6a	XLOC_030455	ZK1055.6	chrV:6599237-6602587	no	yes
WBGene00011331	-0.681326	0.681326	0.0306575	0.876725	0.810396	-0.810396	0.00795	0.419309	T01E8.1	174584	II	T01E8.1	XLOC_005457	T01E8.1	chrII:10206715-10209331	no	no
WBGene00009301	-0.782364	0.782364	0.0408698	0.966637	0.884706	-0.884706	0.0062	0.378103	F31F6.2	185176	X	F31F6.2	XLOC_038062	F31F6.2	chrX:14869536-14870606	no	no
WBGene00007734	1.55541	-1.55541	0.000679255	0.087946	-0.907311	0.907311	0.38355	0.999956	C25G4.7	182916	IV		XLOC_014866	C25G4.7	chrIV:12456936-12458538	no	yes
WBGene00016944	0.530347	-0.530347	0.0361631	0.925821	-0.582451	0.582451	0.00725	0.408126	uri-1	183841	I	C55B7.5	XLOC_000743	uri-1	chrI:6494330-6495896	no	yes
WBGene00011326	1.0643	-1.0643	0.0308328	0.876725	-1.38487	1.38487	0.00855	0.441022	T01D3.1	179859	V	T01D3.1a	XLOC_028364	T01D3.1	chrV:13689961-13703231	no	no
WBGene00008205	-0.438144	0.438144	0.0112144	0.548023	0.451233	-0.451233	0.02355	0.650042	sams-1	181370	X	C49F5.1	XLOC_034933	sams-1	chrX:11965959-11967325	no	no
WBGene00012911	-0.638469	0.638469	0.0344743	0.915354	0.608169	-0.608169	0.0077	0.411686	acl-7	174916	II	Y46G5A.21	XLOC_008203	acl-7	chrII:12811850-12816389	no	yes
WBGene00020788	-0.771493	0.771493	0.00302682	0.239081	0.77029	-0.77029	0.09055	0.892323	nep-22	181144	X	T25B6.2	XLOC_034483	nep-22	chrX:8836014-9038321	no	no
WBGene00015386	0.780179	-0.780179	0.0485907	0.999353	-1.00557	1.00557	0.0057	0.362724	C03B8.3	182155	III	C03B8.3	XLOC_009444	C03B8.3	chrIII:7712302-7717235	no	yes
WBGene00016641	-0.540017	0.540017	0.0147566	0.64101	0.553897	-0.553897	0.01915	0.601146	C44C1.1	180451	X	C44C1.1	XLOC_033087	C44C1.1	chrX:980791-982932	no	yes
WBGene00014021	1.04352	-1.04352	0.0230657	0.769264	-0.928547	0.928547	0.01245	0.519251	svop-1	176250	III	ZK637.1	XLOC_011407	svop-1	chrIII:8882934-8885393	no	yes
WBGene00013854	0.575464	-0.575464	0.00780586	0.428095	-0.621046	0.621046	0.0372	0.737233	cyc-2.2	179728	V	ZC116.2	XLOC_031727	cyc-2.2	chrV:12611328-12628677	no	yes
WBGene00010456	-0.533354	0.533354	0.0145284	0.635759	0.523044	-0.523044	0.0206	0.614944	K01C8.1	174326	II	K01C8.1	XLOC_005163	K01C8.1	chrII:8265151-8267203	no	yes
WBGene00021068	-0.611861	0.611861	0.0243196	0.797467	0.600241	-0.600241	0.01255	0.519251	W06H8.6	3564781	V	W06H8.6	XLOC_030373	W06H8.6	chrV:6224027-6226964	no	yes
WBGene00020516	-0.785898	0.785898	0.040592	0.966637	0.790897	-0.790897	0.00785	0.415908	T15B7.1	188512	V	T15B7.1	XLOC_027048	T15B7.1	chrV:6840268-6846368	no	no
WBGene00010705	1.46378	-1.46378	0.0272155	0.831629	-1.39993	1.39993	0.01195	0.512537	cyp-14A1	187183	X	K09A11.2	XLOC_037813	cyp-14A1	chrX:13265011-13267269	no	yes
WBGene00017440	-0.476764	0.476764	0.0120327	0.569239	0.450998	-0.450998	0.02695	0.665615	upb-1	174040	II	F13H8.7	XLOC_007119	upb-1	chrII:6288479-6290060	no	no
WBGene00009899	0.932342	-0.932342	0.0182024	0.712162	-0.852044	0.852044	0.0187	0.596617	efl-3	174341	II	F49E12.6	XLOC_005182	efl-3	chrII:8412647-8416453	no	yes
WBGene00017773	-0.622102	0.622102	0.0341489	0.910566	0.634539	-0.634539	0.0101	0.480735	dct-6	175846	III	F25B5.1a	XLOC_009201	dct-6	chrIII:5966365-5971255	no	yes
WBGene00008042	-0.950356	0.950356	0.0219089	0.749801	0.812661	-0.812661	0.0161	0.58545	C40H1.7	176311	III	C40H1.7a	XLOC_009690	C40H1.7	chrIII:9324994-9327052	no	yes
WBGene00020182	-0.890699	0.890699	0.0584011	0.999353	1.05087	-1.05087	0.00615	0.377018	ugt-53	178744	V	T03D3.1	XLOC_026451	ugt-53	chrV:2849362-2852017	no	no
WBGene00015295	-0.584722	0.584722	0.0240055	0.79338	0.648034	-0.648034	0.01505	0.568453	acl-12	181001	X	C01C10.3	XLOC_036922	acl-12	chrX:7439680-7442530	no	no
WBGene00012684	-1.19327	1.19327	0.0136558	0.610334	1.10171	-1.10171	0.02755	0.666494	Y39B6A.25	180249	V	Y39B6A.25	XLOC_029245	Y39B6A.25	chrV:19026451-19035222	no	yes
WBGene00022765	0.686648	-0.686648	0.244676	0.999353	-0.70197	0.70197	0.00155	0.169616	ZK546.14	173854	II	ZK546.14a	XLOC_006861	ZK546.14	chrII:4944173-4945783	no	yes
WBGene00015449	-0.609279	0.609279	0.0327163	0.903041	0.579527	-0.579527	0.0118	0.511727	ugt-63	182223	V	C04F5.7	XLOC_030187	ugt-63	chrV:5108179-5110751	no	no
WBGene00012115	0.972139	-0.972139	0.00092422	0.113797	-1.03746	1.03746	0.41795	0.999956	T28B8.4	13181077	I	T28B8.4	XLOC_000975	T28B8.4	chrI:7741935-8394405	no	no
WBGene00003450	0.423379	-0.423379	0.0174273	0.690441	-0.511227	0.511227	0.0224	0.644282	msp-57	177274	IV	R13H9.2	XLOC_012748	msp-57	chrIV:5062569-5062953	no	yes
WBGene00019915	0.721765	-0.721765	0.0267678	0.831629	-0.719114	0.719114	0.01475	0.560739	tbc-10	3564790	III	R06B10.5	XLOC_008563	tbc-10	chrIII:983249-988275	no	no
WBGene00003764	-0.724099	0.724099	0.0159152	0.660908	0.641172	-0.641172	0.02505	0.660609	nlp-26	180281	V	Y43F8C.2	XLOC_029320	nlp-26	chrV:19613501-19614458	no	yes
WBGene00008975	-0.482016	0.482016	0.0154318	0.656977	0.523824	-0.523824	0.0268	0.665615	F20D1.3	181593	X	F20D1.3	XLOC_035418	F20D1.3	chrX:14976047-14978484	no	yes
WBGene00000266	-0.570477	0.570477	0.0371019	0.932056	0.6355	-0.6355	0.01105	0.503441	bre-1	177717	IV	C53B4.7a	XLOC_014215	bre-1	chrIV:8987259-8990259	no	yes
WBGene00014076	0.482319	-0.482319	0.0346037	0.916851	-0.640472	0.640472	0.01225	0.517817	ZK792.1	178100	IV	ZK792.1a	XLOC_014700	ZK792.1	chrIV:11662169-11665047	no	yes
WBGene00017459	-0.768808	0.768808	0.000722901	0.092642	0.783401	-0.783401	0.5871	0.999956	F14D2.11	184461	II	F14D2.11	XLOC_006657	F14D2.11	chrII:2443296-4279128	no	yes
WBGene00020467	0.572038	-0.572038	0.0128746	0.590116	-0.489617	0.489617	0.03245	0.708759	T12F5.2	188456	I	T12F5.2	XLOC_000362	T12F5.2	chrI:3731373-3732837	no	yes
WBGene00000395	0.602631	-0.602631	0.0201152	0.749184	-0.600314	0.600314	0.0203	0.61261	cdh-3	176085	III	ZK112.7	XLOC_011205	cdh-3	chrIII:7741329-7754383	no	yes
WBGene00045416	-1.65553	1.65553	0.0214678	0.749801	1.41973	-1.41973	0.0194	0.604135	Y37H2A.14	6418795	V	Y37H2A.14	XLOC_029141	Y37H2A.14	chrV:18143752-18144592	no	no
WBGene00000594	-1.15854	1.15854	0.000420003	0.0627954	1.31143	-1.31143	1	1	col-3	177695	IV	T28C6.6	XLOC_021303	col-3	chrIV:8822992-8824151	no	no
WBGene00001132	-0.566672	0.566672	0.0124072	0.580125	0.527535	-0.527535	0.0339	0.709195	alp-1	177701	IV	T11B7.4a	XLOC_014193	alp-1	chrIV:8852500-8862017	no	no
WBGene00044296	-0.742387	0.742387	0.0161531	0.665137	0.63967	-0.63967	0.02605	0.665615	F10C1.9	3565708	II	F10C1.9a	XLOC_007015	F10C1.9	chrII:5743105-5745129	no	no
WBGene00014152	-0.739366	0.739366	0.0143265	0.629113	0.641547	-0.641547	0.02965	0.683217	ZK930.2	191463	II	ZK930.2	XLOC_008091	ZK930.2	chrII:11890981-11893329	no	no
WBGene00000151	0.54729	-0.54729	0.0401811	0.966637	-0.584465	0.584465	0.0108	0.493973	apn-1	174291	II	T05H10.2	XLOC_005118	apn-1	chrII:8047511-8048965	no	yes
WBGene00009626	-0.549502	0.549502	0.0192304	0.731957	0.512824	-0.512824	0.02295	0.647522	F42A8.1	174481	II	F42A8.1	XLOC_007654	F42A8.1	chrII:9341498-9346506	no	no
WBGene00001148	-0.621975	0.621975	0.0344397	0.915354	0.70181	-0.70181	0.0129	0.520849	eat-20	181641	X	H30A04.1a	XLOC_035504	eat-20	chrX:15516688-15523227	no	no
WBGene00010871	-0.703457	0.703457	0.0597621	0.999353	0.93182	-0.93182	0.00745	0.410889	M05B5.3	266840	I	M05B5.3a	XLOC_000849	M05B5.3	chrI:7186624-7188157	no	no
WBGene00009189	0.497879	-0.497879	0.0600477	0.999353	-0.551865	0.551865	0.00745	0.410889	F27D4.4	172538	I	F27D4.4a	XLOC_000919	F27D4.4	chrI:7725024-7726872	no	yes
WBGene00000717	-1.04479	1.04479	0.00885873	0.473711	0.758925	-0.758925	0.05115	0.809043	col-144	179296	V	B0222.6	XLOC_030948	col-144	chrV:9159671-9160604	no	no
WBGene00012003	0.783296	-0.783296	0.0271782	0.831629	-0.779036	0.779036	0.01735	0.596617	T24H10.5	188871	II	T24H10.5	XLOC_005305	T24H10.5	chrII:9102647-9105389	no	yes
WBGene00020891	-0.721058	0.721058	0.0269786	0.831629	0.67938	-0.67938	0.01755	0.596617	T28C12.4	179017	V	T28C12.4a	XLOC_026948	T28C12.4	chrV:6323264-6326176	no	no
WBGene00012317	-0.658157	0.658157	0.0202224	0.749184	0.607291	-0.607291	0.02355	0.650042	ztf-6	173014	I	W06H12.1	XLOC_001420	ztf-6	chrI:11206977-11211293	no	yes
WBGene00195070	-1.20616	1.20616	0.001197	0.132379	1.24519	-1.24519	0.40175	0.999956	C16C8.20	13184345	II	C16C8.20	XLOC_004273	C16C8.20	chrII:2443296-4279128	no	yes
WBGene00016935	0.755841	-0.755841	0.0421706	0.984177	-0.832398	0.832398	0.0115	0.511453	ifta-1	183817	X	C54G7.4	XLOC_036578	ifta-1	chrX:5545651-5552661	no	no
WBGene00001395	-0.440428	0.440428	0.0117807	0.56471	0.423352	-0.423352	0.0411	0.763873	fat-3	177820	IV	W08D2.4a	XLOC_014357	fat-3	chrIV:9803042-9805979	no	no
WBGene00017041	-1.34412	1.34412	0.0358344	0.925821	1.34386	-1.34386	0.01375	0.540264	D2007.1	183937	III	D2007.1	XLOC_009511	D2007.1	chrIII:8155407-8155877	no	no
WBGene00010703	-1.05004	1.05004	0.0312189	0.877133	0.933596	-0.933596	0.0159	0.58545	K09A9.6	181645	X	K09A9.6a	XLOC_035513	K09A9.6	chrX:15577587-15586680	no	no
WBGene00000391	-0.685934	0.685934	0.0246429	0.801788	0.661944	-0.661944	0.0204	0.614045	cdd-1	183546	X	C47D2.2	XLOC_037068	cdd-1	chrX:8208768-8210744	no	no
WBGene00018336	0.77514	-0.77514	0.0424734	0.984177	-0.843651	0.843651	0.01185	0.511999	F42A9.7	185655	IV	F42A9.7	XLOC_021267	F42A9.7	chrIV:8616045-8617066	no	no
WBGene00003443	0.481923	-0.481923	0.0119597	0.569239	-0.433787	0.433787	0.04285	0.774887	msp-50	173890	II	C34F11.4	XLOC_004555	msp-50	chrII:5199785-5200169	no	no
WBGene00020382	-0.481626	0.481626	0.0219107	0.749801	0.49471	-0.49471	0.02355	0.650042	T09B4.8	172301	I	T09B4.8	XLOC_002561	T09B4.8	chrI:6164838-6166533	no	yes
WBGene00003442	0.438134	-0.438134	0.0210348	0.749801	-0.491934	0.491934	0.02515	0.660908	msp-49	173888	II	C34F11.6	XLOC_004553	msp-49	chrII:5194354-5194738	no	no
WBGene00006696	-1.12043	1.12043	0.062482	0.999353	1.1796	-1.1796	0.0091	0.455904	twk-46	180252	V	Y39B6A.19a	XLOC_029249	twk-46	chrV:19060160-19066878	no	no
WBGene00001885	0.745465	-0.745465	0.00057081	0.078778	0	0	1	1	his-11	175029	II	ZK131.5	XLOC_005954	his-11	chrII:13507760-13903274	no	no
WBGene00007344	-1.38951	1.38951	0.0511981	0.999353	1.72357	-1.72357	0.0114	0.511453	C05E7.2	182266	X	C05E7.2	XLOC_037763	C05E7.2	chrX:12938679-12940641	no	yes
WBGene00003409	-0.565952	0.565952	0.0352837	0.924679	0.621277	-0.621277	0.0165	0.58545	mrp-3	181677	X	E03G2.2	XLOC_038241	mrp-3	chrX:15929938-15939252	no	no
WBGene00012298	0.441385	-0.441385	0.0222321	0.754629	-0.479752	0.479752	0.02715	0.665615	prmt-7	172727	I	W06D4.4	XLOC_002990	prmt-7	chrI:9060554-9063140	no	yes
WBGene00015892	-1.11186	1.11186	0.0798452	0.999353	1.34444	-1.34444	0.0076	0.410889	C17C3.9	182718	II	C17C3.9	XLOC_006969	C17C3.9	chrII:5531380-5532237	no	no
WBGene00010701	-0.47347	0.47347	0.0151172	0.647978	0.455571	-0.455571	0.0404	0.761745	ent-2	181648	X	K09A9.3	XLOC_035515	ent-2	chrX:15601004-15603256	no	yes
WBGene00020223	0.629001	-0.629001	0.0324947	0.900885	-0.648778	0.648778	0.01895	0.598074	T05A7.6	173804	II	T05A7.6	XLOC_006814	T05A7.6	chrII:4668714-4671736	no	yes
WBGene00009717	0.676867	-0.676867	0.00637576	0.376978	-0.573383	0.573383	0.09985	0.914482	dep-1	174437	II	F44G4.8a	XLOC_007605	dep-1	chrII:9006108-9019705	no	no
WBGene00017993	0.446582	-0.446582	0.036245	0.925821	-0.475404	0.475404	0.01775	0.596617	cec-5	177537	IV	F32E10.6	XLOC_021106	cec-5	chrIV:7578737-7580093	no	yes
WBGene00018317	0.496978	-0.496978	0.0554602	0.999353	-0.562586	0.562586	0.0117	0.511453	F41H10.4	177317	IV	F41H10.4	XLOC_012930	F41H10.4	chrIV:5364551-5366572	no	yes
WBGene00011573	-0.703424	0.703424	0.0311816	0.877133	0.699351	-0.699351	0.02075	0.614944	anmt-3	179385	V	T07C12.9	XLOC_031078	anmt-3	chrV:9957107-9958276	no	no
WBGene00005019	0.394971	-0.394971	0.0697213	0.999353	-0.542862	0.542862	0.0094	0.462456	sqv-1	177631	IV	D2096.4a	XLOC_014128	sqv-1	chrIV:8361109-8362992	no	yes
WBGene00001918	0.743785	-0.743785	0.000657135	0.0859683	0	0	1	1	his-44	175033	II	F08G2.1	XLOC_008304	his-44	chrII:13507760-13903274	no	yes
WBGene00020299	0.870995	-0.870995	0.0428217	0.984978	-1.05446	1.05446	0.0155	0.574334	T07A9.12	176867	IV	T07A9.12	XLOC_012042	T07A9.12	chrIV:414249-415504	no	yes
WBGene00011487	-0.56293	0.56293	0.0137436	0.612077	0.50807	-0.50807	0.04875	0.797226	T05E12.6	180136	V	T05E12.6a	XLOC_032522	T05E12.6	chrV:17085013-17089401	no	no
WBGene00011680	-0.476418	0.476418	0.0171299	0.682966	0.466586	-0.466586	0.03935	0.753266	T10B10.3	181612	X	T10B10.3	XLOC_038119	T10B10.3	chrX:15178596-15181385	no	no
WBGene00004037	-0.668823	0.668823	0.102128	0.999353	0.91629	-0.91629	0.00675	0.393213	plc-2	180029	V	Y75B12B.6	XLOC_028651	plc-2	chrV:15192705-15197553	no	yes
WBGene00010666	0.521076	-0.521076	0.0334576	0.910566	-0.593492	0.593492	0.02065	0.614944	K08E4.2	178144	IV	K08E4.2a	XLOC_021903	K08E4.2	chrIV:12055831-12056619	no	yes
WBGene00010790	-0.72212	0.72212	0.0357315	0.925821	0.764066	-0.764066	0.0193	0.602623	sodh-1	179627	V	K12G11.3	XLOC_028030	sodh-1	chrV:11888276-11889418	no	no
WBGene00013070	1.20931	-1.20931	0.0588927	0.999353	-1.20647	1.20647	0.01165	0.511453	Y51A2B.6	190131	V	Y51A2B.6	XLOC_032698	Y51A2B.6	chrV:18391978-18394275	no	no
WBGene00007343	-1.5582	1.5582	0.0509879	0.999353	1.6232	-1.6232	0.01375	0.540264	C05E7.1	181427	X	C05E7.1	XLOC_037764	C05E7.1	chrX:12941481-12943477	no	yes
WBGene00003463	0.419177	-0.419177	0.0307546	0.876725	-0.516002	0.516002	0.02275	0.646553	msp-76	177802	IV	ZK1251.6	XLOC_014339	msp-76	chrIV:9688997-9689381	no	yes
WBGene00015828	-1.1671	1.1671	0.0481057	0.999353	1.11922	-1.11922	0.0145	0.554838	math-14	182658	II	C16C4.4a	XLOC_004041	math-14	chrII:1869427-1870695	no	no
WBGene00012538	-0.558767	0.558767	0.0103949	0.525119	0.580972	-0.580972	0.06865	0.855466	Y37A1B.5	178360	IV	Y37A1B.5a	XLOC_015503	Y37A1B.5	chrIV:14051196-14056600	no	yes
WBGene00007422	-0.653687	0.653687	0.0305445	0.876725	0.674714	-0.674714	0.02345	0.650042	ugt-17	179406	V	C08B6.1a	XLOC_031110	ugt-17	chrV:10102603-10104873	no	no
WBGene00016885	0.638381	-0.638381	0.0785077	0.999353	-0.819083	0.819083	0.00915	0.455904	fbxb-97	183726	II	C52E2.6	XLOC_006403	fbxb-97	chrII:1847103-1848159	no	no
WBGene00016455	0.711808	-0.711808	0.14366	0.999353	-1.10933	1.10933	0.00505	0.33983	C35E7.3	172991	I	C35E7.3	XLOC_001379	C35E7.3	chrI:10836974-10838866	no	no
WBGene00011152	0.494134	-0.494134	0.026612	0.831629	-0.574727	0.574727	0.0274	0.665615	R09A8.1	187722	X	R09A8.1a	XLOC_035047	R09A8.1	chrX:12612658-12617812	no	no
WBGene00012785	-0.988387	0.988387	0.0585598	0.999353	1.02944	-1.02944	0.0127	0.519945	Y43C5B.2	189849	IV	Y43C5B.2	XLOC_021596	Y43C5B.2	chrIV:10351423-10352261	no	yes
WBGene00017365	-1.29506	1.29506	0.0214266	0.749801	1.27989	-1.27989	0.0347	0.716231	F10G2.4	184315	V	F10G2.4	XLOC_027126	F10G2.4	chrV:7327209-7327737	no	no
WBGene00016204	-0.588847	0.588847	0.0374638	0.937267	0.611512	-0.611512	0.02005	0.611167	gsto-1	183000	III	C29E4.7	XLOC_011240	gsto-1	chrIII:7945529-7946953	no	yes
WBGene00008453	-0.800636	0.800636	0.040319	0.966637	0.871395	-0.871395	0.01925	0.602623	E02A10.3	179722	V	E02A10.3a	XLOC_028185	E02A10.3	chrV:12583816-12587926	no	yes
WBGene00011467	-0.682738	0.682738	0.0388951	0.957812	0.637266	-0.637266	0.02005	0.611167	decr-1.3	174316	II	T05C12.3	XLOC_007466	decr-1.3	chrII:8172223-8173487	no	yes
WBGene00018688	1.60891	-1.60891	0.0334395	0.910566	-1.77518	1.77518	0.02315	0.650032	F52D2.6	186105	X	F52D2.6	XLOC_033210	F52D2.6	chrX:1976156-1976559	no	no
WBGene00018577	0.57241	-0.57241	0.068881	0.999353	-1.00234	1.00234	0.0113	0.511453	asna-2	NA	X		XLOC_033276	asna-2	chrX:2383112-2384268	no	no
WBGene00003959	-0.885292	0.885292	0.0183179	0.712244	0.825692	-0.825692	0.0431	0.775898	pcp-4	180301	V	Y116F11B.3	XLOC_032868	pcp-4	chrV:19809963-19853972	no	no
WBGene00018439	-0.892439	0.892439	0.0262214	0.831629	0.75961	-0.75961	0.0301	0.688161	fbxa-184	185770	II	F45C12.8	XLOC_004005	fbxa-184	chrII:1710284-1711423	no	no
WBGene00011891	-0.6716	0.6716	0.0109179	0.539836	0.665902	-0.665902	0.07325	0.8566	del-6	179474	V	T21C9.3a	XLOC_027710	del-6	chrV:10566631-10576383	no	yes
WBGene00015088	-0.534934	0.534934	0.0262763	0.831629	0.527105	-0.527105	0.03035	0.689833	B0252.3	174130	II	B0252.3a	XLOC_007261	B0252.3	chrII:6902969-6907713	no	yes
WBGene00022853	0.315642	-0.315642	0.14544	0.999353	-0.824615	0.824615	0.00555	0.361028	ZK1127.6	174149	II	ZK1127.6	XLOC_004939	ZK1127.6	chrII:7042841-7044329	no	yes
WBGene00011739	-0.440205	0.440205	0.0164053	0.668654	0.424431	-0.424431	0.04945	0.802764	T12G3.4	178141	IV	T12G3.4	XLOC_014782	T12G3.4	chrIV:12048245-12049837	no	yes
WBGene00014164	-0.626707	0.626707	0.0464642	0.999353	0.62994	-0.62994	0.0176	0.596617	lact-2	174570	II	ZK945.1	XLOC_005436	lact-2	chrII:10094815-10098630	no	yes
WBGene00022865	0.486119	-0.486119	0.110625	0.999353	-0.59238	0.59238	0.0074	0.410889	ufbp-1	176194	III	ZK1236.7a	XLOC_011325	ufbp-1	chrIII:8439650-8443530	no	yes
WBGene00001214	0.418997	-0.418997	0.0227241	0.767182	-0.418097	0.418097	0.03625	0.728047	ego-1	172524	I	F26A3.3	XLOC_002788	ego-1	chrI:7650662-7656268	no	yes
WBGene00008464	-0.538335	0.538335	0.0127548	0.587714	0.462933	-0.462933	0.06555	0.848741	E02H4.6	183997	X	E02H4.6	XLOC_037960	E02H4.6	chrX:14250651-14252067	no	no
WBGene00015023	0.414312	-0.414312	0.030668	0.876725	-0.465067	0.465067	0.02755	0.666494	B0205.9	172975	I	B0205.9	XLOC_001361	B0205.9	chrI:10720814-10723264	no	no
WBGene00023424	0.769584	-0.769584	0.0363486	0.925968	-0.721682	0.721682	0.02365	0.650042	C53D6.10	3565065	IV	C53D6.10	XLOC_021334	C53D6.10	chrIV:9033619-9034191	no	no
WBGene00016295	1.51247	-1.51247	0.0462312	0.999353	-1.50431	1.50431	0.0189	0.598074	fbxc-40	173477	II	C32B5.1a	XLOC_003908	fbxc-40	chrII:986024-988617	no	no
WBGene00021852	-0.638989	0.638989	0.00136444	0.138194	0.652985	-0.652985	0.64415	0.999956	Y54F10AM.8	175369	III	Y54F10AM.8	XLOC_010507	Y54F10AM.8	chrIII:2418503-2779010	no	no
WBGene00011502	0.450394	-0.450394	0.0246027	0.801788	-0.444113	0.444113	0.0361	0.72628	vps-53	176377	III	T05G5.8a	XLOC_011557	vps-53	chrIII:9753742-9757429	no	yes
WBGene00003767	-1.71998	1.71998	0.0195996	0.743659	1.83944	-1.83944	0.0455	0.780316	nlp-29	178805	V	B0213.4	XLOC_026608	nlp-29	chrV:3984431-3984722	no	no
WBGene00017718	-1.59367	1.59367	0.0309055	0.876725	1.31621	-1.31621	0.02905	0.678935	F22F4.5	3565477	X	F22F4.5	XLOC_036662	F22F4.5	chrX:5992119-5992800	no	no
WBGene00001064	-0.946719	0.946719	0.0708237	0.999353	1.16786	-1.16786	0.01265	0.519945	dpy-2	174107	II	T14B4.6	XLOC_004875	dpy-2	chrII:6714257-6715756	no	no
WBGene00007924	0.657356	-0.657356	0.0013506	0.138194	-0.585827	0.585827	0.67845	0.999956	rsu-1	175451	III	C34C12.5	XLOC_008822	rsu-1	chrIII:3200941-3648757	no	yes
WBGene00010515	-1.65145	1.65145	0.0275294	0.837148	1.41218	-1.41218	0.0334	0.709092	K02E11.6	186897	V	K02E11.6	XLOC_028472	K02E11.6	chrV:14250894-14251456	no	no
WBGene00001099	-0.503591	0.503591	0.017247	0.685458	0.452964	-0.452964	0.05385	0.822527	dsc-4	176852	IV	K02D7.4	XLOC_019126	dsc-4	chrIV:315118-320470	no	yes
WBGene00014165	0.457643	-0.457643	0.0399843	0.966637	-0.466204	0.466204	0.0236	0.650042	puf-12	174572	II	ZK945.3	XLOC_005438	puf-12	chrII:10100269-10102812	no	yes
WBGene00007070	-0.550442	0.550442	0.021604	0.749801	0.497297	-0.497297	0.04385	0.775898	ugt-49	179446	V	AC3.2	XLOC_027672	ugt-49	chrV:10372316-10374184	no	no
WBGene00009116	0.510504	-0.510504	0.0213388	0.749801	-0.508102	0.508102	0.04535	0.780316	snx-27	172937	I	F25H2.2	XLOC_001324	snx-27	chrI:10543014-10546174	no	no
WBGene00022555	-1.76165	1.76165	0.0156795	0.660803	1.3091	-1.3091	0.0622	0.846661	btb-12	191109	II	ZC204.3	XLOC_003995	btb-12	chrII:1655222-1656154	no	no
WBGene00003452	0.367337	-0.367337	0.0389792	0.958004	-0.50459	0.50459	0.02535	0.660908	msp-59	177309	IV	ZK354.11	XLOC_019974	msp-59	chrIV:5312719-5313103	no	yes
WBGene00001730	-2.30784	2.30784	0.0302235	0.876725	3.08889	-3.08889	0.03275	0.708759	grl-21	177967	IV	ZC168.5	XLOC_014532	grl-21	chrIV:10737472-10738034	no	yes
WBGene00020134	2.48659	-2.48659	0.00520602	0.340047	-3.20022	3.20022	0.1921	0.999956	T01B6.1	187927	X	T01B6.1	XLOC_033268	T01B6.1	chrX:2335804-2348570	no	no
WBGene00021539	0.438029	-0.438029	0.0449828	0.999353	-0.488069	0.488069	0.02245	0.644282	Y42H9AR.4	3565368	IV	Y42H9AR.4	XLOC_021194	Y42H9AR.4	chrIV:8108285-8112191	no	yes
WBGene00007063	0.599252	-0.599252	0.0819688	0.999353	-0.753517	0.753517	0.01245	0.519251	2L52.1	181792	II	2L52.1a	XLOC_003760	2L52.1	chrII:1866-4663	no	yes
WBGene00009222	-0.484356	0.484356	0.0225374	0.762931	0.44798	-0.44798	0.0464	0.7806	fbxa-95	185071	V	F28F8.4	XLOC_028717	fbxa-95	chrV:15571469-15572650	no	yes
WBGene00016714	-0.587952	0.587952	0.0564346	0.999353	0.686836	-0.686836	0.0189	0.598074	C46F2.1	183512	X	C46F2.1	XLOC_034310	C46F2.1	chrX:8078025-8079837	no	no
WBGene00016585	-0.626845	0.626845	0.0517956	0.999353	-2.40638	2.40638	0.0207	0.614944	oac-59	178180	IV	C42C1.7a	XLOC_021953	oac-59	chrIV:12293335-12301235	no	yes
WBGene00007412	0.461124	-0.461124	0.0399651	0.966637	-0.740948	0.740948	0.0273	0.665615	stip-1	174600	II	C07E3.1a	XLOC_007839	stip-1	chrII:10347082-10349945	no	yes
WBGene00000544	0.640557	-0.640557	0.108199	0.999353	-0.876173	0.876173	0.0101	0.480735	clp-3	173089	I	Y47H10A.1	XLOC_003442	clp-3	chrI:12073165-12083602	no	yes
WBGene00019773	1.15654	-1.15654	0.0718013	0.999353	-1.36776	1.36776	0.0152	0.572273	M04G7.2	187449	IV	M04G7.2a	XLOC_019144	M04G7.2	chrIV:458062-460447	no	no
WBGene00020307	-1.01383	1.01383	0.106859	0.999353	1.36361	-1.36361	0.01025	0.484348	T07D3.4	173469	II	T07D3.4a	XLOC_003884	T07D3.4	chrII:888458-890691	no	no
WBGene00007538	-0.548261	0.548261	0.148482	0.999353	0.985697	-0.985697	0.00745	0.410889	C12D8.9	182543	V	C12D8.9a	XLOC_031143	C12D8.9	chrV:10242829-10243153	no	yes
WBGene00008239	-0.601487	0.601487	0.0462893	0.999353	0.663882	-0.663882	0.0239	0.650651	fshr-1	179381	V	C50H2.1a	XLOC_027592	fshr-1	chrV:9889935-9894603	no	no
WBGene00016954	0.771775	-0.771775	0.0571992	0.999353	-0.803008	0.803008	0.01955	0.607191	C55C3.4	177346	IV	C55C3.4	XLOC_020255	C55C3.4	chrIV:5676200-5678041	no	no
WBGene00003464	0.347172	-0.347172	0.0723759	0.999353	-0.52289	0.52289	0.01545	0.574334	msp-77	177844	IV	F32B6.6	XLOC_014374	msp-77	chrIV:9894609-9894993	no	no
WBGene00009293	-0.684377	0.684377	0.0486483	0.999353	0.756119	-0.756119	0.0231	0.650032	F31D4.8	185150	V	F31D4.8	XLOC_032987	F31D4.8	chrV:20866918-20868389	no	no
WBGene00016286	-0.638518	0.638518	0.0293399	0.860293	0.591395	-0.591395	0.0389	0.749145	C31H1.1	183094	IV	C31H1.1	XLOC_013205	C31H1.1	chrIV:5797509-5800146	no	no
WBGene00013474	0.395133	-0.395133	0.0209135	0.749801	-0.394023	0.394023	0.05475	0.823383	Y69E1A.2	177992	IV	Y69E1A.2	XLOC_014567	Y69E1A.2	chrIV:10949856-10951055	no	no
WBGene00000854	0.399173	-0.399173	0.0362691	0.925821	-0.458237	0.458237	0.0321	0.708759	cux-7	176066	III	C07H6.8	XLOC_011177	cux-7	chrIII:7518671-7520631	no	yes
WBGene00001786	-1.38542	1.38542	0.00364489	0.269272	1.33884	-1.33884	0.3205	0.999956	gst-38	185299	V	F35E8.8	XLOC_032318	gst-38	chrV:15699960-16443388	no	no
WBGene00018035	-1.36817	1.36817	0.0580088	0.999353	1.21341	-1.21341	0.02015	0.611167	sek-4	180811	X	F35C8.2	XLOC_033787	sek-4	chrX:5375037-5376804	no	no
WBGene00018068	0.688932	-0.688932	0.13237	0.999353	-0.985326	0.985326	0.00895	0.45366	F35H10.2	185328	IV	F35H10.2	XLOC_014114	F35H10.2	chrIV:8329211-8329818	no	no
WBGene00012352	0.934959	-0.934959	0.00118904	0.132379	0	0	1	1	dkf-1	173234	I	W09C5.5	XLOC_003614	dkf-1	chrI:13143189-14566044	no	yes
WBGene00006863	-0.596015	0.596015	0.0341106	0.910566	0.538532	-0.538532	0.03505	0.716231	gyg-1	180644	X	F56B6.4a	XLOC_033466	gyg-1	chrX:3537628-3540609	no	no
WBGene00019643	-1.46223	1.46223	0.0497777	0.999353	1.25835	-1.25835	0.0241	0.651702	K11C4.2	187288	V	K11C4.2	XLOC_027059	K11C4.2	chrV:6895069-6896743	no	no
WBGene00001888	0.71787	-0.71787	0.00121217	0.132379	0	0	1	1	his-14	175027	II	ZK131.8	XLOC_005961	his-14	chrII:13507760-13903274	no	no
WBGene00022573	-2.64446	2.64446	0.00573048	0.361654	2.06962	-2.06962	0.2125	0.999956	ZC239.15	191125	II	ZC239.15	XLOC_006632	ZC239.15	chrII:2443296-4279128	no	no
WBGene00000783	-0.859363	0.859363	0.0857217	0.999353	1.10593	-1.10593	0.0143	0.552603	cpr-3	180033	V	T10H4.12	XLOC_032204	cpr-3	chrV:15296988-15298599	no	no
WBGene00004113	1.5036	-1.5036	0.0749922	0.999353	-1.61428	1.61428	0.0164	0.58545	pqn-24	183891	I	D1007.14	XLOC_000459	pqn-24	chrI:4564140-4565925	no	no
WBGene00001743	0.514745	-0.514745	0.0479688	0.999353	-0.491102	0.491102	0.0258	0.662483	grp-1	176140	III	K06H7.4	XLOC_009496	grp-1	chrIII:8085684-8087993	no	yes
WBGene00000283	-0.546799	0.546799	0.0706814	0.999353	0.679123	-0.679123	0.01755	0.596617	cah-5	180972	X	R173.1	XLOC_034119	cah-5	chrX:7020046-7023806	no	no
WBGene00018427	-0.404497	0.404497	0.0426626	0.984925	0.516728	-0.516728	0.0292	0.679727	F44E7.5	178967	V	F44E7.5a	XLOC_030302	F44E7.5	chrV:5779007-5780759	no	yes
WBGene00044180	0.979455	-0.979455	0.108213	0.999353	-1.3424	1.3424	0.01155	0.511453	C47E8.11	3565399	V	C47E8.11	XLOC_028558	C47E8.11	chrV:14688621-14688905	no	yes
WBGene00018138	-0.491573	0.491573	0.0493606	0.999353	0.464868	-0.464868	0.0254	0.660908	folt-2	178745	V	F37B4.7	XLOC_029819	folt-2	chrV:2872712-2875476	no	no
WBGene00001890	0.683601	-0.683601	0.00126547	0.134718	0	0	1	1	his-16	175025	II	ZK131.10	XLOC_008298	his-16	chrII:13507760-13903274	no	no
WBGene00018297	-1.44478	1.44478	0.0748036	0.999353	1.54879	-1.54879	0.01705	0.595904	F41F3.3	178856	V	F41F3.3	XLOC_030114	F41F3.3	chrV:4647754-4648225	no	no
WBGene00012433	-1.38944	1.38944	0.101344	0.999353	1.92096	-1.92096	0.01285	0.520625	Y11D7A.9	189434	IV	Y11D7A.9	XLOC_021367	Y11D7A.9	chrIV:9254242-9256082	no	no
WBGene00001916	0.896056	-0.896056	0.00131731	0.136728	0	0	1	1	his-42	184200	II	F08G2.3	XLOC_008306	his-42	chrII:13507760-13903274	no	yes
WBGene00016606	0.435545	-0.435545	0.040727	0.966637	-0.46564	0.46564	0.0323	0.708759	exoc-7	172023	I	C43E11.8	XLOC_002265	exoc-7	chrI:4242938-4247581	no	yes
WBGene00019940	0.401613	-0.401613	0.0311639	0.877133	-0.406933	0.406933	0.0438	0.775898	npp-21	174232	II	R07G3.3a	XLOC_005038	npp-21	chrII:7599610-7607789	no	yes
WBGene00004059	-0.507417	0.507417	0.051514	0.999353	0.585504	-0.585504	0.02665	0.665615	pmp-2	174127	II	C44B7.9	XLOC_007255	pmp-2	chrII:6884072-6887662	no	yes
WBGene00000022	-0.634165	0.634165	0.051685	0.999353	0.609025	-0.609025	0.02665	0.665615	abt-4	178559	V	Y39D8C.1	XLOC_029499	abt-4	chrV:323910-330725	no	no
WBGene00013702	-0.595998	0.595998	0.325283	0.999353	1.52359	-1.52359	0.0043	0.322748	Y106G6D.6	190917	I	Y106G6D.6	XLOC_003189	Y106G6D.6	chrI:10118131-10119301	no	yes
WBGene00007309	0.456272	-0.456272	0.0853763	0.999353	-0.636346	0.636346	0.0165	0.58545	C04G2.10	182234	IV	C04G2.10a	XLOC_014425	C04G2.10	chrIV:10115477-10117999	no	yes
WBGene00009427	0.837605	-0.837605	0.0596211	0.999353	-0.899991	0.899991	0.02385	0.650651	fbxa-181	185305	V	F35E12.3	XLOC_028371	fbxa-181	chrV:13725891-13726895	no	no
WBGene00010629	0.462057	-0.462057	0.0694765	0.999353	-0.478513	0.478513	0.02065	0.614944	K07C5.6	179443	V	K07C5.6	XLOC_031170	K07C5.6	chrV:10353651-10355792	no	yes
WBGene00002027	0.367713	-0.367713	0.0286581	0.852883	-0.38321	0.38321	0.0505	0.804994	hsr-9	3565010	I	T05F1.6	XLOC_001174	hsr-9	chrI:9626266-9630350	no	yes
WBGene00007761	0.437031	-0.437031	0.0583619	0.999353	-0.462423	0.462423	0.0254	0.660908	rad-26	177706	IV	C27B7.4a	XLOC_014200	rad-26	chrIV:8894092-8901034	no	yes
WBGene00008664	-0.376647	0.376647	0.0164078	0.668654	0.336502	-0.336502	0.0906	0.892323	nubp-1	172868	I	F10G8.6	XLOC_001251	nubp-1	chrI:10046438-10047864	no	yes
WBGene00010935	-0.902296	0.902296	0.0975446	0.999353	1.51473	-1.51473	0.01525	0.572315	M163.1	181546	X	M163.1	XLOC_037990	M163.1	chrX:14503304-14503754	no	no
WBGene00013947	-0.611523	0.611523	0.0418718	0.979269	0.559594	-0.559594	0.03595	0.724507	ZK228.4	180201	V	ZK228.4a	XLOC_029187	ZK228.4	chrV:18462786-18465292	no	yes
WBGene00011388	0.523153	-0.523153	0.0532481	0.999353	-0.563072	0.563072	0.02825	0.676255	T02G6.5	173060	I	T02G6.5a	XLOC_001498	T02G6.5	chrI:11815905-11819224	no	no
WBGene00000190	-0.739071	0.739071	0.100389	0.999353	0.916388	-0.916388	0.0154	0.574334	arf-1.1	191609	IV	F45E4.1	XLOC_013996	arf-1.1	chrIV:7634901-7635638	no	yes
WBGene00016154	0.48981	-0.48981	0.0725944	0.999353	-0.495218	0.495218	0.0212	0.622132	C27A12.2	172281	I	C27A12.2	XLOC_000656	C27A12.2	chrI:6041675-6045863	no	yes
WBGene00011631	0.401474	-0.401474	0.0391169	0.958086	-0.421866	0.421866	0.0395	0.753266	T08G11.4	172704	I	T08G11.4a	XLOC_002958	T08G11.4	chrI:8902840-8905440	no	yes
WBGene00018561	0.817723	-0.817723	0.0665202	0.999353	-0.858259	0.858259	0.02335	0.650042	gadr-3	185933	III	F47D12.5	XLOC_010995	gadr-3	chrIII:6282392-6285893	no	yes
WBGene00003466	0.358587	-0.358587	0.0685533	0.999353	-0.612386	0.612386	0.02275	0.646553	msp-79	177812	IV	T13F2.10	XLOC_021469	msp-79	chrIV:9766750-9767134	no	no
WBGene00001884	0.706449	-0.706449	0.00155569	0.15264	0	0	1	1	his-10	191671	II	ZK131.4	XLOC_008301	his-10	chrII:13507760-13903274	no	no
WBGene00010630	-0.738183	0.738183	0.0846951	0.999353	0.833022	-0.833022	0.01865	0.596617	ttll-15	187090	V	K07C5.7	XLOC_027669	ttll-15	chrV:10358536-10361221	no	yes
WBGene00001029	0.470999	-0.470999	0.0743383	0.999353	-0.472626	0.472626	0.0213	0.623315	dnj-11	177419	IV	F38A5.13	XLOC_013739	dnj-11	chrIV:6585859-6587886	no	yes
WBGene00000585	0.37271	-0.37271	0.0360676	0.925821	-0.411776	0.411776	0.04345	0.775898	cogc-2	177473	IV	C06G3.10	XLOC_020982	cogc-2	chrIV:7037071-7039536	no	yes
WBGene00009962	0.710848	-0.710848	0.0124256	0.580125	-0.48344	0.48344	0.12735	0.944937	F53B6.7	172710	I	F53B6.7	XLOC_001074	F53B6.7	chrI:8948811-8954345	no	yes
WBGene00018848	0.393399	-0.393399	0.0294749	0.860293	-0.426056	0.426056	0.0539	0.822527	F55A3.2	172985	I	F55A3.2	XLOC_001371	F55A3.2	chrI:10793580-10797889	no	yes
WBGene00001886	0.721688	-0.721688	0.00158732	0.153348	0	0	1	1	his-12	175028	II	ZK131.6	XLOC_005962	his-12	chrII:13507760-13903274	no	no
WBGene00007577	0.461513	-0.461513	0.0504998	0.999353	-0.464741	0.464741	0.03185	0.708759	nrde-1	175477	III	C14B1.6a	XLOC_008847	nrde-1	chrIII:3713528-3718576	no	yes
WBGene00017811	0.404073	-0.404073	0.0264511	0.831629	-0.439222	0.439222	0.06075	0.845495	F26A1.13	184951	III	F26A1.13	XLOC_010786	F26A1.13	chrIII:4847035-4848931	no	yes
WBGene00022534	0.411939	-0.411939	0.0919732	0.999353	-0.55022	0.55022	0.0175	0.596617	syx-16	175712	III	ZC155.7	XLOC_010847	syx-16	chrIII:5207583-5208844	no	yes
WBGene00000839	0.359456	-0.359456	0.0269698	0.831629	-0.387998	0.387998	0.06005	0.844871	cul-4	174198	II	F45E12.3	XLOC_004983	cul-4	chrII:7302069-7305489	no	yes
WBGene00001483	0.95437	-0.95437	0.0735933	0.999353	-1.02754	1.02754	0.02195	0.634599	fog-3	172863	I	C03C11.2	XLOC_001246	fog-3	chrI:10016767-10017918	no	no
WBGene00020949	0.425412	-0.425412	0.0595495	0.999353	-0.520269	0.520269	0.0281	0.676255	W02F12.4	179062	V	W02F12.4a	XLOC_030476	W02F12.4	chrV:6704668-6706824	no	yes
WBGene00021786	0.97546	-0.97546	0.154658	0.999353	-1.62714	1.62714	0.0108	0.493973	Y51H7C.8	190177	II	Y51H7C.8	XLOC_003959	Y51H7C.8	chrII:1401834-1402112	no	yes
WBGene00015014	-0.57116	0.57116	0.032649	0.903041	0.534999	-0.534999	0.05055	0.804994	bath-24	181826	II	B0047.3	XLOC_006437	bath-24	chrII:2044706-2045590	no	yes
WBGene00004186	0.458553	-0.458553	0.043868	0.992682	-0.482447	0.482447	0.03815	0.746987	prpf-4	172443	I	F22D6.5a	XLOC_002702	prpf-4	chrI:7091459-7094510	no	yes
WBGene00015230	0.711582	-0.711582	0.082997	0.999353	-0.762597	0.762597	0.0202	0.611167	tag-344	182017	I	B0511.4	XLOC_001352	tag-344	chrI:10644272-10645561	no	yes
WBGene00020672	-1.31253	1.31253	0.0982859	0.999353	1.51682	-1.51682	0.0171	0.595904	T22B7.3	188723	X	T22B7.3	XLOC_033832	T22B7.3	chrX:5647345-5650075	no	no
WBGene00017258	-1.1112	1.1112	0.101305	0.999353	2.13887	-2.13887	0.0164	0.58545	F08F1.4	181095	X	F08F1.4a	XLOC_034362	F08F1.4	chrX:8411644-8413953	no	no
WBGene00013086	-1.04709	1.04709	0.119916	0.999353	1.39499	-1.39499	0.0137	0.540264	arrd-2	174491	II	Y51B9A.4	XLOC_005353	arrd-2	chrII:9407794-9408900	no	no
WBGene00014064	-1.59466	1.59466	0.0221062	0.752389	1.22463	-1.22463	0.0752	0.858849	sdz-37	191391	II	ZK673.10	XLOC_005501	sdz-37	chrII:10464809-10465238	no	no
WBGene00011366	1.27061	-1.27061	0.0662885	0.999353	-1.38402	1.38402	0.02525	0.660908	T02C1.2	176306	III	T02C1.2	XLOC_009678	T02C1.2	chrIII:9250964-9252771	no	no
WBGene00007405	0.719615	-0.719615	0.0645709	0.999353	-0.90502	0.90502	0.02555	0.662483	C07A9.9	182357	III	C07A9.9	XLOC_011537	C07A9.9	chrIII:9663598-9667445	no	no
WBGene00010485	-0.590771	0.590771	0.0708175	0.999353	0.566888	-0.566888	0.02425	0.652589	ant-1.3	186855	IV	K01H12.2	XLOC_021457	ant-1.3	chrIV:9708199-9709241	no	yes
WBGene00003007	-0.611096	0.611096	0.060348	0.999353	0.651926	-0.651926	0.02845	0.67652	lin-18	180679	X	C16B8.1	XLOC_033535	lin-18	chrX:3958539-3961764	no	no
WBGene00010900	0.458844	-0.458844	0.0157598	0.660908	-0.494765	0.494765	0.10955	0.931285	M28.9	174642	II	M28.9	XLOC_005530	M28.9	chrII:10639723-10643477	no	no
WBGene00011335	-0.722464	0.722464	0.0164515	0.668654	0.650299	-0.650299	0.1054	0.919557	T01E8.8	259461	II	T01E8.8	XLOC_005461	T01E8.8	chrII:10231248-10235448	no	yes
WBGene00043051	0.496421	-0.496421	0.105515	0.999353	-0.609946	0.609946	0.0165	0.58545	C29E4.13	259332	III	C29E4.13a	XLOC_011239	C29E4.13	chrIII:7926986-7928555	no	yes
WBGene00001480	0.608446	-0.608446	0.0358215	0.925821	-0.535755	0.535755	0.0498	0.803986	fmo-5	178596	V	H24K24.5a	XLOC_029578	fmo-5	chrV:899380-903548	no	yes
WBGene00021204	0.947305	-0.947305	0.0652109	0.999353	-0.924887	0.924887	0.0271	0.665615	fbxb-77	189469	IV	Y17G9B.7a	XLOC_019619	fbxb-77	chrIV:4754190-4756128	no	yes
WBGene00017541	-0.678295	0.678295	0.081442	0.999353	0.58629	-0.58629	0.02185	0.634599	F17E9.4	177630	IV	F17E9.4	XLOC_014123	F17E9.4	chrIV:8348373-8349080	no	yes
WBGene00014087	0.482126	-0.482126	0.0773589	0.999353	-0.48035	0.48035	0.02295	0.647522	ZK809.5	178098	IV	ZK809.5a	XLOC_014698	ZK809.5	chrIV:11656733-11659176	no	yes
WBGene00019138	-0.560177	0.560177	0.0732209	0.999353	0.677647	-0.677647	0.0241	0.651702	bath-21	186647	II	F59H6.8	XLOC_006429	bath-21	chrII:2025646-2026615	no	yes
WBGene00011509	0.364129	-0.364129	0.0263996	0.831629	-0.382853	0.382853	0.06745	0.855466	T05H10.4	174293	II	T05H10.4a	XLOC_005119	T05H10.4	chrII:8053102-8054664	no	yes
WBGene00009008	-0.846658	0.846658	0.00273135	0.222747	0.405842	-0.405842	0.66485	0.999956	F21D5.3	177680	IV	F21D5.3a	XLOC_014181	F21D5.3	chrIV:8730813-8735592	no	yes
WBGene00003730	-0.540952	0.540952	0.0821351	0.999353	0.56085	-0.56085	0.0222	0.640246	nhx-2	174242	II	B0495.4	XLOC_007381	nhx-2	chrII:7690768-7693896	no	yes
WBGene00009271	0.772623	-0.772623	0.00360157	0.269239	-0.858508	0.858508	0.5032	0.999956	glna-3	172547	I	F30F8.2	XLOC_002805	glna-3	chrI:7741935-8394405	no	yes
WBGene00045511	-2.56205	2.56205	0.00629795	0.376978	2.88805	-2.88805	0.2881	0.999956	F11A5.18	13217335	V	F11A5.18	XLOC_028834	F11A5.18	chrV:15699960-16443388	no	no
WBGene00012185	-0.616671	0.616671	0.0876671	0.999353	0.588908	-0.588908	0.0208	0.614944	W01F3.2	180351	V	W01F3.2	XLOC_029438	W01F3.2	chrV:20660366-20661907	no	no
WBGene00020433	-0.45365	0.45365	0.0292018	0.860293	0.432609	-0.432609	0.06195	0.846661	T11F8.1	188416	IV	T11F8.1	XLOC_012990	T11F8.1	chrIV:5479626-5480508	no	no
WBGene00011415	0.447612	-0.447612	0.0329196	0.904676	-0.41274	0.41274	0.0561	0.833397	him-18	175620	III	T04A8.15	XLOC_010760	him-18	chrIII:4712584-4715142	no	yes
WBGene00219374	-0.484027	0.484027	0.0641282	0.999353	0.750064	-0.750064	0.02875	0.677331	C25A11.10	NA	X		XLOC_034501	C25A11.10	chrX:9121827-9123008	no	no
WBGene00219678	0.366566	-0.366566	0.32559	0.999353	-1.32131	1.32131	0.0057	0.362724	linc-9	NA	I		XLOC_000358	linc-9	chrI:3703544-3704959	no	no
WBGene00018284	0.877414	-0.877414	0.195136	0.999353	-2.18877	2.18877	0.00955	0.46787	F41E6.1	185617	V	F41E6.1	XLOC_027353	F41E6.1	chrV:8622768-8623470	no	no
WBGene00020905	0.501449	-0.501449	0.0564684	0.999353	-0.59922	0.59922	0.03305	0.708759	T28H11.7	177268	IV	T28H11.7	XLOC_019778	T28H11.7	chrIV:5015311-5016200	no	no
WBGene00019411	-0.696165	0.696165	0.0556489	0.999353	0.779448	-0.779448	0.0341	0.709195	K05F1.10	187030	II	K05F1.10	XLOC_007027	K05F1.10	chrII:5804696-5805442	no	yes
WBGene00013694	0.367744	-0.367744	0.0600774	0.999353	-0.511766	0.511766	0.0322	0.708759	Y106G6A.1	172850	I	Y106G6A.1	XLOC_003160	Y106G6A.1	chrI:9936247-9938144	no	yes
WBGene00008229	-0.560598	0.560598	0.11833	0.999353	0.655246	-0.655246	0.01645	0.58545	C50F4.1	179333	V	C50F4.1	XLOC_027524	C50F4.1	chrV:9526820-9529111	no	yes
WBGene00008750	0.408499	-0.408499	0.0335873	0.910566	-0.405477	0.405477	0.05875	0.840117	F13E9.1	177981	IV	F13E9.1	XLOC_014551	F13E9.1	chrIV:10864309-10873092	no	yes
WBGene00017027	0.563271	-0.563271	0.043813	0.992682	-0.555427	0.555427	0.04545	0.780316	D1044.1	175763	III	D1044.1	XLOC_009127	D1044.1	chrIII:5544263-5546186	no	yes
WBGene00016486	-0.603103	0.603103	0.0508235	0.999353	0.575237	-0.575237	0.0392	0.752447	fbxa-170	183273	X	C36C9.3	XLOC_035949	fbxa-170	chrX:1676491-1678102	no	no
WBGene00013524	0.923807	-0.923807	0.113574	0.999353	-1.12745	1.12745	0.0179	0.596617	Y73F8A.15	190677	IV	Y73F8A.15	XLOC_017024	Y73F8A.15	chrIV:15321588-15322148	no	yes
WBGene00006678	-0.865647	0.865647	0.0533836	0.999353	0.872976	-0.872976	0.0379	0.743335	twk-25	192076	IV	M04B2.5a	XLOC_014672	twk-25	chrIV:11504753-11509550	no	no
WBGene00004023	-0.690648	0.690648	0.0721096	0.999353	0.677633	-0.677633	0.02815	0.676255	pho-4	173897	II	T16D1.2	XLOC_006916	pho-4	chrII:5236015-5238447	no	no
WBGene00008949	1.21943	-1.21943	0.0704557	0.999353	-1.2574	1.2574	0.02915	0.679727	F19B6.3	184667	IV	F19B6.3	XLOC_014831	F19B6.3	chrIV:12327337-12328489	no	yes
WBGene00012087	0.415393	-0.415393	0.053785	0.999353	-0.503481	0.503481	0.03825	0.747424	T27E7.1	178390	IV	T27E7.1	XLOC_016005	T27E7.1	chrIV:14519838-14520940	no	yes
WBGene00000232	0.774029	-0.774029	0.242855	0.999353	-1.39088	1.39088	0.00845	0.437792	avr-14	172270	I	B0207.12a	XLOC_002522	avr-14	chrI:5967416-5973322	no	no
WBGene00004323	0.427441	-0.427441	0.0714947	0.999353	-0.457296	0.457296	0.02885	0.678323	rde-1	179393	V	K08H10.7	XLOC_031088	rde-1	chrV:9988018-9991590	no	yes
WBGene00002052	-0.742131	0.742131	0.0710288	0.999353	0.745841	-0.745841	0.0293	0.680702	ifa-4	180765	X	K05B2.3	XLOC_036482	ifa-4	chrX:4912581-4915945	no	no
WBGene00017448	-0.571979	0.571979	0.113335	0.999353	0.831386	-0.831386	0.01835	0.596617	F14B8.6	180966	X	F14B8.6	XLOC_036840	F14B8.6	chrX:6929433-6932030	no	no
WBGene00010243	0.84843	-0.84843	0.147884	0.999353	-1.33074	1.33074	0.0142	0.552603	F58D5.3	173088	I	F58D5.3	XLOC_001526	F58D5.3	chrI:12069914-12072839	no	yes
WBGene00008019	-0.584089	0.584089	0.0469195	0.999353	0.551233	-0.551233	0.0448	0.780316	C38H2.2	176455	III	C38H2.2	XLOC_009855	C38H2.2	chrIII:10381691-10384666	no	no
WBGene00009203	0.418594	-0.418594	0.0305985	0.876725	-0.414453	0.414453	0.0689	0.856312	aptf-3	185047	II	F28C6.2	XLOC_005218	aptf-3	chrII:8594297-8596055	no	no
WBGene00009782	-1.15882	1.15882	0.0895512	0.999353	1.36643	-1.36643	0.02385	0.650651	F46C5.7	185846	II	F46C5.7	XLOC_005259	F46C5.7	chrII:8839335-8840111	no	no
WBGene00020402	0.432921	-0.432921	0.0583065	0.999353	-0.492178	0.492178	0.03695	0.735795	T10B11.6	172424	I	T10B11.6	XLOC_002679	T10B11.6	chrI:6943378-6945357	no	yes
WBGene00015017	0.405801	-0.405801	0.0626834	0.999353	-0.442399	0.442399	0.0346	0.71578	B0205.1	172974	I	B0205.1a	XLOC_003269	B0205.1	chrI:10713765-10717902	no	yes
WBGene00007650	-0.628516	0.628516	0.0469485	0.999353	0.571757	-0.571757	0.0462	0.7806	ugt-23	181205	X	C17G1.3a	XLOC_037319	ugt-23	chrX:9922884-9925030	no	no
WBGene00019884	0.495303	-0.495303	0.0381458	0.946786	-0.818994	0.818994	0.05675	0.836568	R05D3.12	259522	III	R05D3.12a	XLOC_009559	R05D3.12	chrIII:8380884-8387382	no	no
WBGene00021202	0.407073	-0.407073	0.0924856	0.999353	-0.502683	0.502683	0.02395	0.650651	Y17G9B.5	177244	IV	Y17G9B.5	XLOC_012577	Y17G9B.5	chrIV:4750237-4751432	no	yes
WBGene00012782	-0.491844	0.491844	0.0723651	0.999353	0.509307	-0.509307	0.0304	0.689833	Y43C5A.2	177911	IV	Y43C5A.2	XLOC_014456	Y43C5A.2	chrIV:10269877-10272609	no	yes
WBGene00018995	0.358121	-0.358121	0.0337885	0.910566	-0.379317	0.379317	0.06515	0.846661	ccpp-1	172241	I	F56H1.5	XLOC_002486	ccpp-1	chrI:5754601-5760781	no	yes
WBGene00014011	0.462941	-0.462941	0.0762479	0.999353	-0.472925	0.472925	0.02895	0.678935	ZK632.2	176386	III	ZK632.2	XLOC_009761	ZK632.2	chrIII:9799023-9802198	no	yes
WBGene00003720	-0.856013	0.856013	0.121642	0.999353	1.00505	-1.00505	0.01805	0.596617	nhr-130	187965	V	T01G6.8	XLOC_029513	nhr-130	chrV:480883-483330	no	no
WBGene00015067	0.890985	-0.890985	0.0733062	0.999353	-0.943264	0.943264	0.02985	0.68398	B0238.1	178912	V	B0238.1	XLOC_030209	B0238.1	chrV:5240840-5243045	no	no
WBGene00016913	-0.392594	0.392594	0.0242697	0.797467	0.379559	-0.379559	0.0904	0.892323	lam-2	180980	X	C54D1.5	XLOC_036873	lam-2	chrX:7144890-7151143	no	no
WBGene00015638	0.460427	-0.460427	0.0544408	0.999353	-0.478192	0.478192	0.0407	0.76249	C09E7.4	175928	III	C09E7.4	XLOC_011029	C09E7.4	chrIII:6534488-6536936	no	no
WBGene00014092	-0.451491	0.451491	0.0487868	0.999353	0.453946	-0.453946	0.0458	0.780316	ZK822.5	178127	IV	ZK822.5a	XLOC_014761	ZK822.5	chrIV:11937395-11940485	no	no
WBGene00007395	-0.607186	0.607186	0.0545621	0.999353	0.553791	-0.553791	0.04105	0.763873	dcar-1	259679	V	C06H5.7	XLOC_029107	dcar-1	chrV:17910297-17917056	no	yes
WBGene00011944	0.433811	-0.433811	0.0799159	0.999353	-0.453294	0.453294	0.0286	0.67652	T23D8.3	172857	I	T23D8.3	XLOC_003168	T23D8.3	chrI:9973567-9976276	no	yes
WBGene00007544	-1.68505	1.68505	0.0337626	0.910566	2.03674	-2.03674	0.0677	0.855466	fipr-6	3565311	V	C12D8.17	XLOC_027648	fipr-6	chrV:10231241-10231510	no	no
WBGene00014066	0.522541	-0.522541	0.0406709	0.966637	-0.52695	0.52695	0.05625	0.833397	rev-1	174275	II	ZK675.2	XLOC_005101	rev-1	chrII:7900595-7904510	no	no
WBGene00044684	0.692145	-0.692145	0.0706239	0.999353	-0.692071	0.692071	0.03255	0.708759	T08G11.2	191630	I	T08G11.2	XLOC_002961	T08G11.2	chrI:8919382-8920459	no	yes
WBGene00015557	0.391341	-0.391341	0.0347671	0.919242	-0.378593	0.378593	0.0664	0.854718	C06G4.1	176123	III	C06G4.1	XLOC_009484	C06G4.1	chrIII:7987063-7990385	no	yes
WBGene00185002	0.456533	-0.456533	0.0575169	0.999353	-0.503165	0.503165	0.04025	0.760141	K11H3.8	13190936	III	K11H3.8a	XLOC_009771	K11H3.8	chrIII:9835107-9838224	no	yes
WBGene00017967	0.501257	-0.501257	0.026965	0.831629	-0.545381	0.545381	0.08595	0.880211	ada-2	174194	II	F32A5.1a	XLOC_004976	ada-2	chrII:7252365-7255475	no	no
WBGene00008922	-0.589622	0.589622	0.128275	0.999353	0.779483	-0.779483	0.0182	0.596617	F17C11.11	179515	V	F17C11.11a	XLOC_031310	F17C11.11	chrV:10937676-10938790	no	yes
WBGene00004000	-0.435797	0.435797	0.0931144	0.999353	0.584169	-0.584169	0.02505	0.660609	pgp-6	181278	X	T21E8.1a	XLOC_037451	pgp-6	chrX:10871280-10876189	no	no
WBGene00022885	-0.392469	0.392469	0.0211524	0.749801	0.34983	-0.34983	0.1109	0.931285	ZK1248.19	3564772	II	ZK1248.19	XLOC_007035	ZK1248.19	chrII:5838692-5839305	no	yes
WBGene00009160	0.598272	-0.598272	0.132251	0.999353	-0.874102	0.874102	0.0177	0.596617	F26E4.5	172828	I	F26E4.5	XLOC_003135	F26E4.5	chrI:9768935-9770980	no	yes
WBGene00008107	0.375086	-0.375086	0.037895	0.944292	-0.36613	0.36613	0.06275	0.846661	aspm-1	172746	I	C45G3.1	XLOC_003013	aspm-1	chrI:9221999-9226376	no	yes
WBGene00016420	0.757549	-0.757549	0.0797213	0.999353	-0.84051	0.84051	0.03015	0.688161	C34G6.3	183218	I	C34G6.3	XLOC_000635	C34G6.3	chrI:5896890-5897342	no	no
WBGene00000672	-1.96584	1.96584	0.00886392	0.473711	2.04626	-2.04626	0.27135	0.999956	col-97	176721	III	ZK1010.7	XLOC_011909	col-97	chrIII:12784715-13607695	no	no
WBGene00021495	-0.798648	0.798648	0.139479	0.999353	1.18574	-1.18574	0.0173	0.596617	sqst-2	189791	IV	Y40C5A.1	XLOC_021047	sqst-2	chrIV:7327874-7328949	no	no
WBGene00019597	0.871361	-0.871361	0.13613	0.999353	-1.1447	1.1447	0.01785	0.596617	K09H9.5	187241	I	K09H9.5	XLOC_002139	K09H9.5	chrI:3141734-3143170	no	yes
WBGene00018376	-0.771906	0.771906	0.0329051	0.904676	0.693712	-0.693712	0.07435	0.858007	F43C9.2	180753	X	F43C9.2a	XLOC_033682	F43C9.2	chrX:4786207-4790120	no	yes
WBGene00010044	0.483924	-0.483924	0.102009	0.999353	-0.501108	0.501108	0.02425	0.652589	F54C9.9	174374	II	F54C9.9	XLOC_005215	F54C9.9	chrII:8578004-8581343	no	yes
WBGene00020756	-0.490571	0.490571	0.03772	0.9418	0.447116	-0.447116	0.0656	0.848741	T24A6.20	178776	V	T24A6.20	XLOC_026549	T24A6.20	chrV:3553213-3554525	no	no
WBGene00020813	-0.71311	0.71311	0.0454471	0.999353	0.613087	-0.613087	0.05425	0.822652	T25G12.6	181760	X	T25G12.6	XLOC_038386	T25G12.6	chrX:17225160-17229975	no	no
WBGene00017453	1.31912	-1.31912	0.00645357	0.376978	-1.51197	1.51197	0.38695	0.999956	F14D2.5	184456	II	F14D2.5	XLOC_004254	F14D2.5	chrII:2443296-4279128	no	yes
WBGene00017265	-0.814013	0.814013	0.0670351	0.999353	0.794884	-0.794884	0.0374	0.737233	snpc-1.3	178929	V	F08F3.9a	XLOC_030235	snpc-1.3	chrV:5437269-5439145	no	yes
WBGene00219609	0.410561	-0.410561	0.0800739	0.999353	-0.481423	0.481423	0.03165	0.708585	linc-7	NA	X		XLOC_035569	linc-7	chrX:16002527-16003657	no	yes
WBGene00001019	0.480431	-0.480431	0.0644128	0.999353	-0.490794	0.490794	0.0395	0.753266	dnj-1	178040	IV	B0035.14a	XLOC_014634	dnj-1	chrIV:11299020-11304311	no	yes
WBGene00010845	0.410646	-0.410646	0.0895851	0.999353	-0.44801	0.44801	0.0285	0.67652	M03C11.8	176462	III	M03C11.8	XLOC_011663	M03C11.8	chrIII:10428727-10435886	no	yes
WBGene00003024	1.15068	-1.15068	0.0212218	0.749801	-0.691435	0.691435	0.12025	0.939515	lin-39	176068	III	C07H6.7	XLOC_011178	lin-39	chrIII:7529050-7534635	no	no
WBGene00020967	0.923153	-0.923153	0.0560599	0.999353	-0.834812	0.834812	0.04585	0.780316	W03A5.2	260007	III	W03A5.2	XLOC_009109	W03A5.2	chrIII:5406096-5407929	no	yes
WBGene00000044	2.67598	-2.67598	0.00257636	0.214282	-3.23726	3.23726	1	1	acr-5	191596	III	K03F8.2	XLOC_011026	acr-5	chrIII:6509645-6514712	no	yes
WBGene00011696	0.411028	-0.411028	0.0491828	0.999353	-0.413941	0.413941	0.05285	0.818396	eea-1	179832	V	T10G3.5a	XLOC_031890	eea-1	chrV:13491350-13497353	no	yes
WBGene00013531	0.375521	-0.375521	0.0710215	0.999353	-0.534261	0.534261	0.03665	0.732312	Y73F8A.26	178435	IV	Y73F8A.26a	XLOC_017185	Y73F8A.26	chrIV:15473701-15477025	no	yes
WBGene00045387	-0.75091	0.75091	0.103226	0.999353	0.778613	-0.778613	0.02525	0.660908	K09H9.8	6418598	I	K09H9.8	XLOC_002138	K09H9.8	chrI:3138598-3140569	no	yes
WBGene00003446	0.338681	-0.338681	0.0914735	0.999353	-0.52163	0.52163	0.0287	0.677332	msp-53	177275	IV	R13H9.4	XLOC_019821	msp-53	chrIV:5064669-5065053	no	yes
WBGene00011900	0.888524	-0.888524	0.132714	0.999353	-1.00652	1.00652	0.0198	0.610101	T21C12.4	188690	III	T21C12.4a	XLOC_011679	T21C12.4	chrIII:10552951-10557886	no	yes
WBGene00015389	-0.535631	0.535631	0.0988112	0.999353	0.567704	-0.567704	0.02665	0.665615	scav-1	180812	X	C03F11.3	XLOC_036541	scav-1	chrX:5397729-5400538	no	no
WBGene00006944	0.413759	-0.413759	0.0600056	0.999353	-0.431573	0.431573	0.04385	0.775898	wrn-1	174081	II	F18C5.2	XLOC_004841	wrn-1	chrII:6554944-6559115	no	no
WBGene00004296	0.401265	-0.401265	0.0756026	0.999353	-0.423492	0.423492	0.03545	0.719383	rad-50	179678	V	T04H1.4a	XLOC_028105	rad-50	chrV:12245626-12251040	no	yes
WBGene00219208	-1.55213	1.55213	0.0694482	0.999353	1.48048	-1.48048	0.0384	0.748021	B0365.9	13216068	V	B0365.9	XLOC_031832	B0365.9	chrV:13132003-13133464	no	yes
WBGene00018356	0.919417	-0.919417	0.0594935	0.999353	-1.1175	1.1175	0.0451	0.780316	islo-1	185675	IV	F42G8.5	XLOC_014081	islo-1	chrIV:8136817-8138910	no	yes
WBGene00010502	0.358788	-0.358788	0.0391351	0.958086	-0.365152	0.365152	0.0683	0.855466	K02C4.3	174300	II	K02C4.3a	XLOC_007450	K02C4.3	chrII:8081169-8086795	no	yes
WBGene00007892	1.09815	-1.09815	0.00921696	0.482316	-2.03778	2.03778	0.29165	0.999956	C33B4.4	259464	II	C33B4.4	XLOC_008000	C33B4.4	chrII:10968325-11503888	no	yes
WBGene00016632	0.418799	-0.418799	0.0718804	0.999353	-0.429921	0.429921	0.03755	0.738946	C44B7.12	259441	II	C44B7.12	XLOC_007257	C44B7.12	chrII:6892103-6893591	no	yes
WBGene00021296	0.538603	-0.538603	0.00373408	0.274247	-0.528143	0.528143	0.72925	0.999956	Y25C1A.13	173657	II	Y25C1A.13	XLOC_006609	Y25C1A.13	chrII:2443296-4279128	no	yes
WBGene00001878	0.597815	-0.597815	0.0046302	0.311333	-0.520062	0.520062	0.59295	0.999956	his-4	180072	V	T10C6.11	XLOC_032347	his-4	chrV:15699960-16443388	no	no
WBGene00018311	-1.55154	1.55154	0.111098	0.999353	1.50138	-1.50138	0.02485	0.660609	F41G4.8	185637	X	F41G4.8	XLOC_038342	F41G4.8	chrX:16843355-16844867	no	no
WBGene00017340	-0.983937	0.983937	0.0350814	0.924679	0.734244	-0.734244	0.0777	0.866842	F10D7.3	181766	X	F10D7.3	XLOC_038400	F10D7.3	chrX:17372509-17374527	no	no
WBGene00011173	0.497688	-0.497688	0.0654324	0.999353	-0.531748	0.531748	0.04225	0.774887	acs-18	177918	IV	R09E10.3	XLOC_021590	acs-18	chrIV:10310775-10313584	no	no
WBGene00010827	-0.821222	0.821222	0.102137	0.999353	1.09126	-1.09126	0.02705	0.665615	M02B1.2	187394	IV	M02B1.2	XLOC_014912	M02B1.2	chrIV:12845924-12847991	no	no
WBGene00003142	0.542772	-0.542772	0.0780423	0.999353	-0.514941	0.514941	0.0352	0.716794	mau-8	190455	IV	Y62E10A.8a	XLOC_015006	mau-8	chrIV:13378000-13380301	no	no
WBGene00194703	0.398318	-0.398318	0.0510281	0.999353	-0.460987	0.460987	0.0537	0.822527	F26B1.8	13180558	I	F26B1.8	XLOC_000719	F26B1.8	chrI:6329603-6330128	no	no
WBGene00020049	-0.759788	0.759788	0.128998	0.999353	0.889723	-0.889723	0.0214	0.623315	ttr-8	187856	III	R13A5.6	XLOC_011181	ttr-8	chrIII:7564487-7565278	no	no
WBGene00017855	0.436035	-0.436035	0.086639	0.999353	-0.447034	0.447034	0.03205	0.708759	F27C1.6	172192	I	F27C1.6	XLOC_002428	F27C1.6	chrI:5421510-5428443	no	yes
WBGene00022848	-0.558802	0.558802	0.0992642	0.999353	0.590268	-0.590268	0.0283	0.676255	ZK1055.7	179051	V	ZK1055.7	XLOC_030456	ZK1055.7	chrV:6602758-6605356	no	yes
WBGene00011342	0.4714	-0.4714	0.107286	0.999353	-0.559808	0.559808	0.02625	0.665615	T01G5.7	187960	V	T01G5.7	XLOC_028629	T01G5.7	chrV:15111949-15113411	no	no
WBGene00016009	0.617211	-0.617211	0.128081	0.999353	-0.855697	0.855697	0.02195	0.634599	C23F12.4	181167	X	C23F12.4	XLOC_034530	C23F12.4	chrX:9387376-9388904	no	no
WBGene00006051	0.371959	-0.371959	0.0476976	0.999353	-0.393969	0.393969	0.0588	0.840117	ssq-2	177265	IV	T28H11.5	XLOC_012706	ssq-2	chrIV:4996168-4997488	no	no
WBGene00011411	0.458376	-0.458376	0.0906045	0.999353	-0.527109	0.527109	0.0313	0.702091	sel-13	175617	III	T04A8.10	XLOC_010758	sel-13	chrIII:4699437-4700189	no	yes
WBGene00012143	-0.817927	0.817927	0.0815524	0.999353	0.793753	-0.793753	0.0349	0.716231	T28H10.2	189062	V	T28H10.2	XLOC_031706	T28H10.2	chrV:12510692-12511980	no	no
WBGene00007515	-0.889275	0.889275	0.100277	0.999353	0.923062	-0.923062	0.0286	0.67652	C10C6.7	259598	IV	C10C6.7b	XLOC_021791	C10C6.7	chrIV:11465463-11467210	no	yes
WBGene00009260	0.662052	-0.662052	0.0396052	0.963958	-0.71408	0.71408	0.07305	0.8566	calm-1	172774	I	F30A10.1	XLOC_003054	calm-1	chrI:9472688-9474771	no	yes
WBGene00000543	0.423181	-0.423181	0.0562054	0.999353	-0.422686	0.422686	0.05135	0.809715	clp-2	175618	III	T04A8.16	XLOC_010759	clp-2	chrIII:4700413-4703981	no	yes
WBGene00016469	-0.426534	0.426534	0.0572804	0.999353	0.454325	-0.454325	0.05045	0.804994	C36B7.6	180976	X	C36B7.6	XLOC_036870	C36B7.6	chrX:7097715-7100294	no	no
WBGene00011694	-0.702006	0.702006	0.0501137	0.999353	0.590515	-0.590515	0.05795	0.840117	T10G3.3	179831	V	T10G3.3	XLOC_031889	T10G3.3	chrV:13487115-13489612	no	no
WBGene00010634	0.849636	-0.849636	0.120119	0.999353	-0.993091	0.993091	0.02445	0.655115	K07F5.6	177832	IV	K07F5.6	XLOC_021485	K07F5.6	chrIV:9845008-9846621	no	no
WBGene00018257	-1.455	1.455	0.0674573	0.999353	1.30518	-1.30518	0.04375	0.775898	F41B4.1	180952	X	F41B4.1	XLOC_036813	F41B4.1	chrX:6824109-6825777	no	yes
WBGene00011026	-0.6875	0.6875	0.100212	0.999353	0.81563	-0.81563	0.0295	0.683217	R05D7.1	187603	I	R05D7.1	XLOC_003459	R05D7.1	chrI:12162444-12163512	no	no
WBGene00015956	-0.460538	0.460538	0.068924	0.999353	0.441238	-0.441238	0.04325	0.775898	C18B2.5	180653	X	C18B2.5a	XLOC_036265	C18B2.5	chrX:3606865-3611077	no	yes
WBGene00007178	-0.7556	0.7556	0.0858344	0.999353	0.719846	-0.719846	0.0348	0.716231	B0457.2	174420	II	B0457.2	XLOC_007586	B0457.2	chrII:8924661-8926613	no	yes
WBGene00010369	0.397908	-0.397908	0.0754494	0.999353	-0.434549	0.434549	0.03975	0.756801	chd-1	172432	I	H06O01.2	XLOC_002687	chd-1	chrI:7009504-7015207	no	yes
WBGene00004212	1.04394	-1.04394	0.16377	0.999353	-1.32711	1.32711	0.01825	0.596617	ptl-1	175230	III	F42G9.9a	XLOC_008531	ptl-1	chrIII:765195-771163	no	yes
WBGene00012184	-0.557401	0.557401	0.0859771	0.999353	0.542592	-0.542592	0.03505	0.716231	mnr-1	180350	V	W01F3.1a	XLOC_029437	mnr-1	chrV:20654663-20659493	no	no
WBGene00022200	-0.486177	0.486177	0.0909354	0.999353	0.485291	-0.485291	0.0332	0.709092	fard-1	180582	X	Y71H10A.2	XLOC_033368	fard-1	chrX:2933363-2937025	no	no
WBGene00000959	-0.514123	0.514123	0.0215817	0.749801	0.417944	-0.417944	0.13955	0.95711	dgk-2	180720	X	F46H6.2a	XLOC_036428	dgk-2	chrX:4495199-4504072	no	no
WBGene00016134	-0.420228	0.420228	0.0505648	0.999353	0.453434	-0.453434	0.0596	0.842822	C26B9.5	180803	X	C26B9.5	XLOC_033777	C26B9.5	chrX:5329506-5332237	no	no
WBGene00000992	-0.701974	0.701974	0.109217	0.999353	0.875826	-0.875826	0.02735	0.665615	dhs-29	181027	X	F27D9.6	XLOC_036982	dhs-29	chrX:7661944-7664863	no	no
WBGene00007885	-0.808928	0.808928	0.0924053	0.999353	0.751115	-0.751115	0.0328	0.708759	ugt-21	183141	IV	C33A12.6a	XLOC_014304	ugt-21	chrIV:9500308-9502488	no	no
WBGene00020412	0.403905	-0.403905	0.072051	0.999353	-0.41576	0.41576	0.0426	0.774887	T10E9.2	172365	I	T10E9.2	XLOC_000752	T10E9.2	chrI:6542168-6544878	no	yes
WBGene00000136	-0.524774	0.524774	0.0713022	0.999353	0.525861	-0.525861	0.04295	0.774887	amt-4	180728	X	C05E11.5	XLOC_033649	amt-4	chrX:4565282-4569225	no	no
WBGene00006594	0.527057	-0.527057	0.0216917	0.749801	-0.959474	0.959474	0.14165	0.959842	tom-1	172209	I	M01A10.2a	XLOC_000592	tom-1	chrI:5546229-5561305	no	no
WBGene00007269	0.668542	-0.668542	0.167133	0.999353	-0.943824	0.943824	0.0185	0.596617	C03C10.2	182156	III	C03C10.2	XLOC_008884	C03C10.2	chrIII:4091100-4093254	no	yes
WBGene00007087	0.353584	-0.353584	0.0606628	0.999353	-0.394187	0.394187	0.0512	0.809043	B0001.2	178164	IV	B0001.2	XLOC_021925	B0001.2	chrIV:12146587-12150942	no	yes
WBGene00003444	0.336656	-0.336656	0.0537073	0.999353	-0.461277	0.461277	0.0582	0.840117	msp-51	191292	IV	ZK354.5	XLOC_019968	msp-51	chrIV:5294948-5295332	no	no
WBGene00003482	-0.408247	0.408247	0.0539428	0.999353	0.394642	-0.394642	0.05805	0.840117	mua-3	176430	III	K08E5.3a	XLOC_009830	mua-3	chrIII:10160605-10183169	no	no
WBGene00011185	-0.813229	0.813229	0.0875976	0.999353	0.731388	-0.731388	0.03595	0.724507	R10D12.1	179888	V	R10D12.1	XLOC_031952	R10D12.1	chrV:13932759-13934621	no	no
WBGene00006307	0.357449	-0.357449	0.0524556	0.999353	-0.388767	0.388767	0.0606	0.845495	suf-1	174380	II	F28C6.6	XLOC_005222	suf-1	chrII:8603809-8606494	no	yes
WBGene00007647	0.386832	-0.386832	0.0825885	0.999353	-0.443481	0.443481	0.0388	0.74845	C17E4.10	172770	I	C17E4.10a	XLOC_001139	C17E4.10	chrI:9435457-9440758	no	yes
WBGene00010587	0.898374	-0.898374	0.0701696	0.999353	-0.834951	0.834951	0.0458	0.780316	sol-2	173336	I	K05C4.11	XLOC_003730	sol-2	chrI:14721909-14724720	no	yes
WBGene00016143	0.383763	-0.383763	0.0459297	0.999353	-0.391468	0.391468	0.07045	0.856312	eri-9	175665	III	C26E6.7a	XLOC_009038	eri-9	chrIII:4932442-4934882	no	yes
WBGene00011532	0.441683	-0.441683	0.105408	0.999353	-0.457706	0.457706	0.0309	0.695785	chaf-1	172730	I	T06D10.2	XLOC_002994	chaf-1	chrI:9077879-9080004	no	yes
WBGene00014249	0.413474	-0.413474	0.0884966	0.999353	-0.434301	0.434301	0.0371	0.737233	ZK1307.8	174515	II	ZK1307.8	XLOC_005384	ZK1307.8	chrII:9624579-9626355	no	yes
WBGene00019432	0.35417	-0.35417	0.0570474	0.999353	-0.384248	0.384248	0.0574	0.839072	knl-2	172350	I	K06A5.4	XLOC_000738	knl-2	chrI:6460992-6464098	no	yes
WBGene00009200	0.431206	-0.431206	0.0979876	0.999353	-0.468892	0.468892	0.0335	0.709092	F28C1.1	179705	V	F28C1.1	XLOC_028154	F28C1.1	chrV:12450790-12453195	no	no
WBGene00022762	0.441816	-0.441816	0.0945867	0.999353	-0.45309	0.45309	0.03505	0.716231	ZK546.5	173850	II	ZK546.5	XLOC_004508	ZK546.5	chrII:4935556-4937923	no	yes
WBGene00004965	0.488235	-0.488235	0.0664434	0.999353	-0.526563	0.526563	0.0502	0.804994	spe-11	172179	I	F48C1.7	XLOC_002408	spe-11	chrI:5330645-5332160	no	yes
WBGene00000226	0.368597	-0.368597	0.056426	0.999353	-0.373816	0.373816	0.06	0.844871	atl-1	179352	V	T06E4.3a	XLOC_031027	atl-1	chrV:9634955-9645430	no	yes
WBGene00004117	0.378408	-0.378408	0.0695257	0.999353	-0.393847	0.393847	0.0492	0.801228	sin-3	172628	I	F02E9.4a	XLOC_001002	sin-3	chrI:8416825-8424859	no	yes
WBGene00022590	-0.20013	0.20013	0.342886	0.999353	0.671647	-0.671647	0.00995	0.479443	ZC317.7	191143	V	ZC317.7	XLOC_030243	ZC317.7	chrV:5468820-5470927	no	no
WBGene00022538	-0.546305	0.546305	0.0763304	0.999353	0.59908	-0.59908	0.0448	0.780316	ZC190.4	179248	V	ZC190.4	XLOC_027360	ZC190.4	chrV:8666056-8670590	no	no
WBGene00006876	-0.383817	0.383817	0.0569805	0.999353	0.429499	-0.429499	0.0602	0.844871	vab-10	173058	I	ZK1151.1a	XLOC_003408	vab-10	chrI:11747752-11792057	no	yes
WBGene00016698	0.618862	-0.618862	0.0527108	0.999353	-0.533277	0.533277	0.06555	0.848741	C46A5.1	183497	IV	C46A5.1	XLOC_014020	C46A5.1	chrIV:7763967-7767013	no	yes
WBGene00018864	0.34531	-0.34531	0.0293443	0.860293	-0.328598	0.328598	0.1176	0.93935	F55A12.5	172181	I	F55A12.5	XLOC_000569	F55A12.5	chrI:5345930-5349464	no	no
WBGene00001880	0.715122	-0.715122	0.00464972	0.311333	-0.799015	0.799015	0.74505	0.999956	his-6	191668	V	F45F2.13	XLOC_030828	his-6	chrV:7731614-8569933	no	yes
WBGene00006407	-0.459457	0.459457	0.0339632	0.910566	0.499998	-0.499998	0.10225	0.91622	lim-9	3565712	I	F25H5.1a	XLOC_003011	lim-9	chrI:9182614-9210330	no	yes
WBGene00016862	-0.445771	0.445771	0.0753089	0.999353	0.511147	-0.511147	0.04625	0.7806	C52A10.1	178909	V	C52A10.1	XLOC_030206	C52A10.1	chrV:5230502-5233838	no	no
WBGene00000212	-0.551897	0.551897	0.069593	0.999353	0.535214	-0.535214	0.05015	0.804994	asm-2	181323	X	ZK455.4	XLOC_037532	asm-2	chrX:11321090-11324187	no	no
WBGene00017861	-0.815934	0.815934	0.128748	0.999353	0.869291	-0.869291	0.02725	0.665615	F27D9.2	181028	X	F27D9.2	XLOC_034250	F27D9.2	chrX:7672943-7676078	no	yes
WBGene00011645	-0.505023	0.505023	0.0407444	0.966637	0.427171	-0.427171	0.08605	0.880211	T09B9.4	181190	X	T09B9.4	XLOC_037299	T09B9.4	chrX:9772099-9774279	no	no
WBGene00006635	-0.623504	0.623504	0.0357973	0.925821	0.485265	-0.485265	0.09835	0.914482	tsp-9	180472	X	C25G6.2	XLOC_033109	tsp-9	chrX:1246020-1247494	no	no
WBGene00013118	-1.24847	1.24847	0.0470554	0.999353	1.01618	-1.01618	0.07555	0.858849	Y51H4A.24	178466	IV	Y51H4A.24	XLOC_025615	Y51H4A.24	chrIV:16736297-16743048	no	no
WBGene00017501	-1.65565	1.65565	0.0116718	0.561633	1.56737	-1.56737	0.3092	0.999956	pud-3	178711	V	F15E11.15	XLOC_029738	pud-3	chrV:1743375-2713617	no	no
WBGene00001945	-0.591225	0.591225	0.0495433	0.999353	0.552188	-0.552188	0.07345	0.8566	his-71	181057	X	F45E1.6	XLOC_037035	his-71	chrX:7981497-7982006	no	no
WBGene00003432	0.375289	-0.375289	0.0797689	0.999353	-0.423016	0.423016	0.04555	0.780316	msp-36	177874	IV	C04G2.4	XLOC_014422	msp-36	chrIV:10095411-10095795	no	no
WBGene00017989	0.357906	-0.357906	0.0678472	0.999353	-0.384653	0.384653	0.0544	0.822652	nol-10	177538	IV	F32E10.1	XLOC_013992	nol-10	chrIV:7580592-7583500	no	yes
WBGene00018383	1.08391	-1.08391	0.0957086	0.999353	-1.07933	1.07933	0.03865	0.748021	F43C11.6	185700	II	F43C11.6	XLOC_004101	F43C11.6	chrII:2342441-2343870	no	no
WBGene00015912	0.454869	-0.454869	0.00531928	0.342589	-0.47982	0.47982	0.69605	0.999956	fbxc-50	173669	II	C17F4.5	XLOC_006640	fbxc-50	chrII:2443296-4279128	no	no
WBGene00020486	0.414754	-0.414754	0.140372	0.999353	-0.647845	0.647845	0.02665	0.665615	T13C5.6	180891	X	T13C5.6	XLOC_036702	T13C5.6	chrX:6206573-6207584	no	yes
WBGene00011166	-1.08194	1.08194	0.11491	0.999353	1.20851	-1.20851	0.0325	0.708759	chil-22	187738	II	R09D1.10	XLOC_007683	chil-22	chrII:9464525-9466125	no	no
WBGene00012243	0.356977	-0.356977	0.0555583	0.999353	-0.371992	0.371992	0.06785	0.855466	W04D2.4	179712	V	W04D2.4	XLOC_031704	W04D2.4	chrV:12494813-12497735	no	yes
WBGene00011823	-0.591946	0.591946	0.0609019	0.999353	0.564428	-0.564428	0.0617	0.846661	T18D3.6	188576	X	T18D3.6	XLOC_035029	T18D3.6	chrX:12449848-12450859	no	no
WBGene00010397	-0.428659	0.428659	0.0423988	0.984177	0.474568	-0.474568	0.08895	0.889924	suox-1	181638	X	H13N06.4a	XLOC_035498	suox-1	chrX:15497487-15500015	no	no
WBGene00003602	-0.604107	0.604107	0.11163	0.999353	0.741773	-0.741773	0.03405	0.709195	nhr-3	181551	X	H01A20.1	XLOC_035340	nhr-3	chrX:14558435-14561012	no	no
WBGene00012138	0.614801	-0.614801	0.236026	0.999353	-1.02811	1.02811	0.0162	0.58545	T28F4.3	189059	I	T28F4.3	XLOC_002768	T28F4.3	chrI:7484171-7486036	no	no
WBGene00009479	0.395365	-0.395365	0.0946232	0.999353	-0.429636	0.429636	0.0406	0.761836	fcp-1	172719	I	F36F2.6	XLOC_002979	fcp-1	chrI:9004994-9008701	no	yes
WBGene00020140	-0.44105	0.44105	0.099849	0.999353	0.509014	-0.509014	0.03855	0.748021	ant-1.4	177648	IV	T01B11.4	XLOC_021253	ant-1.4	chrIV:8459213-8460264	no	no
WBGene00019777	0.741177	-0.741177	0.00632767	0.376978	-0.669919	0.669919	0.61155	0.999956	M57.1	177114	IV	M57.1	XLOC_012390	M57.1	chrIV:1956724-4526957	no	no
WBGene00004370	-0.506329	0.506329	0.23169	0.999353	0.935532	-0.935532	0.01675	0.592525	rig-3	180958	X	C53B7.1	XLOC_034082	rig-3	chrX:6853603-6860512	no	no
WBGene00017851	0.353268	-0.353268	0.0462928	0.999353	-0.356776	0.356776	0.0846	0.878693	F27C1.1	172198	I	F27C1.1	XLOC_000582	F27C1.1	chrI:5434093-5443029	no	yes
WBGene00016450	-0.532294	0.532294	0.0548196	0.999353	0.482819	-0.482819	0.07125	0.8566	clec-5	175652	III	C35D10.14	XLOC_010793	clec-5	chrIII:4881915-4883530	no	yes
WBGene00003993	0.350509	-0.350509	0.0566854	0.999353	-0.380459	0.380459	0.06915	0.856312	pgl-2	182022	III	B0523.3	XLOC_011370	pgl-2	chrIII:8670574-8674966	no	yes
WBGene00021448	-0.938372	0.938372	0.218765	0.999353	1.72089	-1.72089	0.01785	0.596617	Y39D8A.1	178565	V	Y39D8A.1a	XLOC_026114	Y39D8A.1	chrV:419709-421755	no	no
WBGene00044676	-0.750222	0.750222	0.120411	0.999353	0.80236	-0.80236	0.03235	0.708759	fbxa-42	4363055	III	Y54F10BL.1	XLOC_010488	fbxa-42	chrIII:2259992-2261419	no	no
WBGene00011105	-0.430007	0.430007	0.0812236	0.999353	0.532495	-0.532495	0.04845	0.796703	R07E3.4	187678	X	R07E3.4	XLOC_037374	R07E3.4	chrX:10330657-10331813	no	yes
WBGene00006988	0.350579	-0.350579	0.0614781	0.999353	-0.38073	0.38073	0.0639	0.846661	zyg-1	173956	II	F59E12.2	XLOC_004644	zyg-1	chrII:5649755-5654209	no	yes
WBGene00009393	-0.640449	0.640449	0.0487779	0.999353	0.504814	-0.504814	0.0814	0.870451	clec-62	174926	II	F35C5.5a	XLOC_008211	clec-62	chrII:12893082-12895029	no	no
WBGene00194651	0.529482	-0.529482	0.216388	0.999353	-0.799994	0.799994	0.0185	0.596617	C33D9.13	13197147	IV	C33D9.13	XLOC_021295	C33D9.13	chrIV:8783363-8784841	no	no
WBGene00014836	0.526423	-0.526423	0.047801	0.999353	-0.598219	0.598219	0.08445	0.878693	T09F5.12	NA	V		XLOC_032175	T09F5.12	chrV:15165597-15166296	no	yes
WBGene00235256	0.720675	-0.720675	0.119402	0.999353	-0.787996	0.787996	0.0339	0.709195	Y54G11A.19	24105152	II	Y54G11A.19	XLOC_008369	Y54G11A.19	chrII:14256534-14256804	no	yes
WBGene00009456	0.397526	-0.397526	0.0744562	0.999353	-0.401538	0.401538	0.05435	0.822652	F36A2.9	172695	I	F36A2.9a	XLOC_001058	F36A2.9	chrI:8816974-8820972	no	yes
WBGene00185077	0.522915	-0.522915	0.219353	0.999353	-0.959459	0.959459	0.01835	0.596617	F58D2.4	13198827	IV	F58D2.4	XLOC_022068	F58D2.4	chrIV:13188268-13189022	no	no
WBGene00017271	0.67294	-0.67294	0.306325	0.999353	-1.24893	1.24893	0.01325	0.531316	F08F8.6	184198	III	F08F8.6	XLOC_009402	F08F8.6	chrIII:7343706-7345760	no	yes
WBGene00016716	-0.483685	0.483685	0.101119	0.999353	0.589124	-0.589124	0.04025	0.760141	acs-17	180859	X	C46F4.2	XLOC_036657	acs-17	chrX:5937924-5942004	no	no
WBGene00017841	-0.876457	0.876457	0.0964477	0.999353	0.888812	-0.888812	0.04235	0.774887	F26G1.5	173823	II	F26G1.5	XLOC_006825	F26G1.5	chrII:4770673-4771377	no	no
WBGene00007600	1.37764	-1.37764	0.100621	0.999353	-1.28411	1.28411	0.04095	0.763873	C15C6.1	173098	I	C15C6.1	XLOC_001539	C15C6.1	chrI:12202229-12203466	no	yes
WBGene00002123	-0.789082	0.789082	0.106813	0.999353	0.896723	-0.896723	0.0386	0.748021	inx-1	180968	X	C16E9.4a	XLOC_036842	inx-1	chrX:6944750-6956301	no	no
WBGene00004039	0.407197	-0.407197	0.0833272	0.999353	-0.427244	0.427244	0.0503	0.804994	plc-4	177525	IV	R05G6.8	XLOC_021093	plc-4	chrIV:7509666-7512650	no	yes
WBGene00002214	0.345282	-0.345282	0.0663253	0.999353	-0.364618	0.364618	0.0634	0.846661	klc-1	178007	IV	M7.2a	XLOC_014597	klc-1	chrIV:11083713-11085838	no	yes
WBGene00004510	0.354109	-0.354109	0.0612134	0.999353	-0.367596	0.367596	0.0685	0.855466	rrf-3	174315	II	F10B5.7	XLOC_005141	rrf-3	chrII:8162505-8168460	no	yes
WBGene00000880	0.385555	-0.385555	0.0991114	0.999353	-0.415988	0.415988	0.0424	0.774887	cyn-4	174674	II	F59E10.2	XLOC_007909	cyn-4	chrII:10870768-10872546	no	yes
WBGene00016623	-0.348924	0.348924	0.0422988	0.984177	0.328323	-0.328323	0.0996	0.914482	psmd-9	24104302	II	C44B7.1	XLOC_004917	psmd-9	chrII:6902050-6902798	no	yes
WBGene00043952	0.755845	-0.755845	0.0675313	0.999353	-0.809426	0.809426	0.0633	0.846661	ZC404.2	13213394	V	ZC404.2	XLOC_027037	ZC404.2	chrV:6787957-6788393	no	yes
WBGene00022951	-0.49163	0.49163	0.0922968	0.999353	0.882785	-0.882785	0.04625	0.7806	C30E1.9	NA	X		XLOC_035697	C30E1.9	chrX:16929840-16931546	no	yes
WBGene00022681	0.501642	-0.501642	0.0354145	0.924679	-0.423041	0.423041	0.1223	0.943182	ZK185.1	191242	IV	ZK185.1a	XLOC_012544	ZK185.1	chrIV:4548547-4552241	no	yes
WBGene00011600	0.314615	-0.314615	0.155467	0.999353	-0.505986	0.505986	0.02785	0.672362	zim-2	177948	IV	T07G12.10	XLOC_014496	zim-2	chrIV:10555628-10558004	no	yes
WBGene00001776	-0.604398	0.604398	0.0453969	0.999353	0.479503	-0.479503	0.0948	0.901422	gst-28	190224	II	Y53F4B.31	XLOC_008455	gst-28	chrII:15166194-15167316	no	yes
WBGene00009478	0.399334	-0.399334	0.0741783	0.999353	-0.428964	0.428964	0.05715	0.838558	syx-7	172718	I	F36F2.4	XLOC_002977	syx-7	chrI:9002102-9003932	no	yes
WBGene00019816	-1.05421	1.05421	0.0890003	0.999353	0.962804	-0.962804	0.04855	0.796703	nhr-204	187519	V	R02C2.4a	XLOC_029493	nhr-204	chrV:254977-257981	no	no
WBGene00011460	-0.658128	0.658128	0.142866	0.999353	0.689303	-0.689303	0.03025	0.6891	ttr-14	181272	X	T05A10.3	XLOC_034744	ttr-14	chrX:10787482-10789486	no	no
WBGene00007934	-0.654856	0.654856	0.106759	0.999353	0.68767	-0.68767	0.0406	0.761836	C34E7.4	181426	X	C34E7.4	XLOC_037761	C34E7.4	chrX:12932439-12934825	no	no
WBGene00003485	-0.426641	0.426641	0.0527048	0.999353	0.383834	-0.383834	0.0814	0.870451	mua-6	181698	X	W10G6.3	XLOC_038266	mua-6	chrX:16262407-16265608	no	no
WBGene00043147	0.475447	-0.475447	0.0614999	0.999353	-0.750255	0.750255	0.07015	0.856312	nspd-6	4926899	IV	C24D10.8	XLOC_019903	nspd-6	chrIV:5165502-5165718	no	no
WBGene00020408	0.677207	-0.677207	0.00642147	0.376978	-0.669282	0.669282	0.6737	0.999956	T10D4.6	173659	II	T10D4.6a	XLOC_004216	T10D4.6	chrII:2443296-4279128	no	no
WBGene00004020	-0.563317	0.563317	0.0995455	0.999353	0.520227	-0.520227	0.04275	0.774887	pho-1	173896	II	EGAP2.3	XLOC_006915	pho-1	chrII:5233289-5235819	no	no
WBGene00020457	-0.592953	0.592953	0.0605174	0.999353	0.539834	-0.539834	0.07015	0.856312	fbxa-67	175258	III	T12B5.11	XLOC_010341	fbxa-67	chrIII:949351-950487	no	no
WBGene00003956	-0.421154	0.421154	0.0470595	0.999353	0.386669	-0.386669	0.0912	0.892323	pcp-1	176086	III	ZK112.1	XLOC_009449	pcp-1	chrIII:7758850-7761135	no	no
WBGene00014028	0.457777	-0.457777	0.0437923	0.992682	-0.416149	0.416149	0.09955	0.914482	trxr-2	176259	III	ZK637.10	XLOC_009636	trxr-2	chrIII:8913701-8916275	no	yes
WBGene00011753	-0.720478	0.720478	0.00598955	0.371091	0.677739	-0.677739	0.73175	0.999956	T13F3.6	180092	V	T13F3.6	XLOC_032398	T13F3.6	chrV:15699960-16443388	no	yes
WBGene00003499	0.413462	-0.413462	0.0845607	0.999353	-0.434297	0.434297	0.0523	0.817598	mut-2	187005	I	K04F10.6a	XLOC_002592	mut-2	chrI:6356713-6358397	no	yes
WBGene00008384	0.776291	-0.776291	0.0854252	0.999353	-0.851412	0.851412	0.05215	0.816343	D1081.6	183930	I	D1081.6a	XLOC_002894	D1081.6	chrI:8482788-8485688	no	yes
WBGene00016706	-0.901717	0.901717	0.133697	0.999353	1.09598	-1.09598	0.0335	0.709092	C46C11.3	180735	X	C46C11.3	XLOC_033658	C46C11.3	chrX:4629028-4631565	no	no
WBGene00008436	-0.496646	0.496646	0.0605389	0.999353	0.489451	-0.489451	0.07445	0.858007	DH11.2	174283	II	DH11.2	XLOC_005113	DH11.2	chrII:8012783-8014930	no	yes
WBGene00015972	0.460968	-0.460968	0.0993288	0.999353	-0.501558	0.501558	0.04545	0.780316	C18E3.3	172016	I	C18E3.3	XLOC_000423	C18E3.3	chrI:4203461-4208337	no	yes
WBGene00017268	0.406146	-0.406146	0.0619779	0.999353	-0.387644	0.387644	0.0733	0.8566	hmgr-1	176047	III	F08F8.2	XLOC_009403	hmgr-1	chrIII:7359449-7361789	no	yes
WBGene00044019	-0.520218	0.520218	0.101845	0.999353	0.572486	-0.572486	0.0449	0.780316	C55A6.12	3565529	V	C55A6.12a	XLOC_031475	C55A6.12	chrV:11501425-11503107	no	yes
WBGene00010050	-0.419013	0.419013	0.0623551	0.999353	0.397376	-0.397376	0.07345	0.8566	F54D5.4	174772	II	F54D5.4	XLOC_005682	F54D5.4	chrII:11569752-11570878	no	yes
WBGene00010623	0.578978	-0.578978	0.0763885	0.999353	-0.555415	0.555415	0.0598	0.843612	K07A12.5	187086	I	K07A12.5a	XLOC_002928	K07A12.5	chrI:8693486-8694978	no	yes
WBGene00011128	-0.287909	0.287909	0.0574667	0.999353	0.345774	-0.345774	0.0815	0.870451	R07H5.8	178028	IV	R07H5.8	XLOC_021743	R07H5.8	chrIV:11209507-11210782	no	no
WBGene00009302	-0.552505	0.552505	0.0776604	0.999353	0.531006	-0.531006	0.0609	0.845881	F31F6.3	185177	X	F31F6.3	XLOC_038063	F31F6.3	chrX:14871766-14872792	no	no
WBGene00008074	0.474041	-0.474041	0.103014	0.999353	-0.555813	0.555813	0.04635	0.7806	nkb-2	177950	IV	C43F9.6	XLOC_014505	nkb-2	chrIV:10590936-10592958	no	yes
WBGene00020502	0.589739	-0.589739	0.145358	0.999353	-0.871141	0.871141	0.0328	0.708759	T14B4.8	188493	II	T14B4.8a	XLOC_007218	T14B4.8	chrII:6720390-6721583	no	yes
WBGene00015001	0.400331	-0.400331	0.255039	0.999353	-0.565595	0.565595	0.01865	0.596617	B0025.4	172279	I	B0025.4	XLOC_000652	B0025.4	chrI:6027201-6028240	no	yes
WBGene00016614	-0.523882	0.523882	0.114565	0.999353	0.598593	-0.598593	0.04155	0.771013	trpp-12	180546	X	C43H6.1	XLOC_033282	trpp-12	chrX:2409703-2412727	no	no
WBGene00004179	0.32496	-0.32496	0.068282	0.999353	-0.357294	0.357294	0.0707	0.8566	prg-2	NA	IV		XLOC_020826	prg-2	chrIV:6526952-6529791	no	yes
WBGene00008197	0.441008	-0.441008	0.0714552	0.999353	-0.40852	0.40852	0.0676	0.855466	C49C3.7	178516	IV	C49C3.7	XLOC_019058	C49C3.7	chrIV:17332541-17333422	no	yes
WBGene00007986	0.714336	-0.714336	0.0688315	0.999353	-0.682264	0.682264	0.06985	0.856312	C36F7.5	183280	I	C36F7.5	XLOC_003086	C36F7.5	chrI:9574794-9576016	no	yes
WBGene00020860	0.458589	-0.458589	0.0341409	0.910566	-0.486315	0.486315	0.1408	0.958845	nspd-10	353386	I	T27C10.7	XLOC_003297	nspd-10	chrI:10876201-10879565	no	yes
WBGene00021899	0.363805	-0.363805	0.0831505	0.999353	-0.38317	0.38317	0.05805	0.840117	Y54H5A.1	175701	III	Y54H5A.1	XLOC_009074	Y54H5A.1	chrIII:5153506-5155277	no	yes
WBGene00017772	-0.434538	0.434538	0.100152	0.999353	0.447167	-0.447167	0.04795	0.794125	clec-1	178958	V	F25B4.9	XLOC_026842	clec-1	chrV:5700197-5700876	no	no
WBGene00011120	0.47676	-0.47676	0.112933	0.999353	-0.536939	0.536939	0.04285	0.774887	R07E5.15	175570	III	R07E5.15	XLOC_008928	R07E5.15	chrIII:4401495-4402412	no	yes
WBGene00195377	-0.505739	0.505739	0.040864	0.966637	0.403243	-0.403243	0.11905	0.939515	F45B8.6	NA	X		XLOC_035402	F45B8.6	chrX:14951129-14954451	no	no
WBGene00008646	0.393912	-0.393912	0.0740937	0.999353	-0.407836	0.407836	0.06625	0.854319	F10C2.5	179653	V	F10C2.5	XLOC_028064	F10C2.5	chrV:12045412-12048411	no	yes
WBGene00007583	-0.474136	0.474136	0.120187	0.999353	0.521071	-0.521071	0.0408	0.763142	C14B4.2	182595	V	C14B4.2	XLOC_032817	C14B4.2	chrV:19332725-19349458	no	yes
WBGene00002696	0.398296	-0.398296	0.098423	0.999353	-0.423692	0.423692	0.04985	0.803986	let-504	171995	I	E01A2.4	XLOC_002243	let-504	chrI:4129631-4132194	no	yes
WBGene00015865	-0.790922	0.790922	0.103836	0.999353	0.738559	-0.738559	0.0473	0.788362	C16E9.1	182693	X	C16E9.1	XLOC_034096	C16E9.1	chrX:6940437-6943534	no	no
WBGene00020084	0.446674	-0.446674	0.0780461	0.999353	-0.509347	0.509347	0.06315	0.846661	R105.1	187895	IV	R105.1	XLOC_012557	R105.1	chrIV:4610892-4638087	no	yes
WBGene00012293	-0.718679	0.718679	0.0336365	0.910566	0.49428	-0.49428	0.14685	0.965779	W06A7.4	189232	V	W06A7.4a	XLOC_028577	W06A7.4	chrV:14824648-14829180	no	yes
WBGene00011747	0.364789	-0.364789	0.102016	0.999353	-0.394928	0.394928	0.0486	0.796703	sna-2	177816	IV	T13F2.7	XLOC_021470	sna-2	chrIV:9774779-9777606	no	yes
WBGene00015310	0.363165	-0.363165	0.0571546	0.999353	-0.369651	0.369651	0.08715	0.883497	fan-1	177415	IV	C01G5.8a	XLOC_013726	fan-1	chrIV:6548902-6552424	no	yes
WBGene00008199	-0.916757	0.916757	0.0165994	0.672488	1.00797	-1.00797	0.3	0.999956	C49C3.9	178519	IV	C49C3.9	XLOC_026039	C49C3.9	chrIV:17339669-17342196	no	no
WBGene00009190	0.518605	-0.518605	0.103589	0.999353	-0.597764	0.597764	0.0482	0.795717	F27D4.6	172540	I	F27D4.6a	XLOC_000922	F27D4.6	chrI:7731185-7737919	no	no
WBGene00001603	0.424834	-0.424834	0.0395651	0.963958	-0.340925	0.340925	0.12675	0.944937	gln-2	176407	III	K03H1.1	XLOC_011588	gln-2	chrIII:9943227-9944589	no	yes
WBGene00016419	-0.393155	0.393155	0.0482133	0.999353	0.354157	-0.354157	0.1043	0.919557	tyr-4	172263	I	C34G6.2	XLOC_000636	tyr-4	chrI:5898323-5902037	no	no
WBGene00019519	-0.863082	0.863082	0.276426	0.999353	1.42537	-1.42537	0.01825	0.596617	K08B5.2	187133	X	K08B5.2	XLOC_038305	K08B5.2	chrX:16551157-16553803	no	no
WBGene00015674	0.829414	-0.829414	0.236122	0.999353	-1.46824	1.46824	0.0214	0.623315	C10E2.4	182498	X	C10E2.4	XLOC_038326	C10E2.4	chrX:16749681-16751037	no	no
WBGene00018268	0.723155	-0.723155	0.149122	0.999353	-0.85815	0.85815	0.03395	0.709195	F41C3.2	173821	II	F41C3.2	XLOC_004472	F41C3.2	chrII:4749973-4751583	no	yes
WBGene00009671	0.392512	-0.392512	0.0880878	0.999353	-0.440469	0.440469	0.0576	0.839898	mfap-1	172661	I	F43G9.10	XLOC_002920	mfap-1	chrI:8638591-8640229	no	yes
WBGene00009349	-1.30927	1.30927	0.0159577	0.660908	0.577203	-0.577203	0.3204	0.999956	F32H5.3	179816	V	F32H5.3a	XLOC_028310	F32H5.3	chrV:13359408-13359751	no	no
WBGene00002056	-0.530856	0.530856	0.0188812	0.725166	0.539505	-0.539505	0.27195	0.999956	ifc-2	180414	X	M6.1a	XLOC_035841	ifc-2	chrX:542110-810722	no	no
WBGene00000523	-0.759436	0.759436	0.159778	0.999353	0.982356	-0.982356	0.0324	0.708759	clc-2	180999	X	C01C10.1	XLOC_034190	clc-2	chrX:7431428-7433295	no	no
WBGene00011988	0.374849	-0.374849	0.0981712	0.999353	-0.413861	0.413861	0.05335	0.820861	har-2	172853	I	T24D1.5	XLOC_003164	har-2	chrI:9956235-9958335	no	yes
WBGene00010512	-0.921482	0.921482	0.195187	0.999353	1.12695	-1.12695	0.02685	0.665615	K02E11.3	186894	V	K02E11.3	XLOC_032001	K02E11.3	chrV:14246343-14246845	no	no
WBGene00016018	-0.449887	0.449887	0.123488	0.999353	0.542151	-0.542151	0.04235	0.774887	C23H3.2	173390	II	C23H3.2a	XLOC_003775	C23H3.2	chrII:61314-64142	no	no
WBGene00006047	0.57169	-0.57169	0.0341092	0.910566	-0.440085	0.440085	0.15315	0.974587	ssp-19	171813	I	C55C2.2	XLOC_000229	ssp-19	chrI:2562669-2562999	no	no
WBGene00004400	0.401846	-0.401846	0.0779636	0.999353	-0.471054	0.471054	0.06785	0.855466	rom-1	184989	III	F26F4.3	XLOC_009035	rom-1	chrIII:4907189-4908786	no	yes
WBGene00000279	0.684816	-0.684816	0.083818	0.999353	-0.675111	0.675111	0.0631	0.846661	cah-1	186231	III	F54D8.4a	XLOC_010835	cah-1	chrIII:5083167-5085251	no	yes
WBGene00022633	-1.3716	1.3716	0.0170321	0.682966	1.47154	-1.47154	0.31375	0.999956	ZC581.3	172383	I	ZC581.3	XLOC_000774	ZC581.3	chrI:6554901-6936826	no	yes
WBGene00007692	0.905064	-0.905064	0.109146	0.999353	-0.872526	0.872526	0.0491	0.800713	C23H4.3	181383	X	C23H4.3	XLOC_034982	C23H4.3	chrX:12226164-12229772	no	no
WBGene00004876	-0.58866	0.58866	0.116008	0.999353	0.601154	-0.601154	0.04665	0.782275	smf-1	180939	X	K11G12.4a	XLOC_036799	smf-1	chrX:6719760-6723004	no	yes
WBGene00017982	0.288031	-0.288031	0.287337	0.999353	-0.525211	0.525211	0.0189	0.598074	hpo-18	178830	V	F32D1.2	XLOC_030075	hpo-18	chrV:4346194-4346406	no	yes
WBGene00018375	-1.18848	1.18848	0.103255	0.999353	1.01104	-1.01104	0.05275	0.818396	F43C9.1	180754	X	F43C9.1	XLOC_033683	F43C9.1	chrX:4793481-4795901	no	yes
WBGene00001443	0.360868	-0.360868	0.0576793	0.999353	-0.343142	0.343142	0.0943	0.901422	fli-1	176215	III	B0523.5	XLOC_011371	fli-1	chrIII:8676013-8683612	no	yes
WBGene00000095	0.412787	-0.412787	0.0434601	0.992682	-0.354056	0.354056	0.12595	0.944937	aha-1	172889	I	C25A1.11a	XLOC_003198	aha-1	chrI:10194148-10196980	no	yes
WBGene00008284	-0.682352	0.682352	0.0981595	0.999353	0.617137	-0.617137	0.0557	0.831877	C53D6.7	183761	IV	C53D6.7	XLOC_021335	C53D6.7	chrIV:9034910-9037147	no	no
WBGene00000118	-0.45642	0.45642	0.125365	0.999353	0.449088	-0.449088	0.04385	0.775898	alh-12	176056	III	Y69F12A.2a	XLOC_009411	alh-12	chrIII:7454023-7455838	no	no
WBGene00011258	-0.45935	0.45935	0.115454	0.999353	0.547055	-0.547055	0.0478	0.793592	best-15	177975	IV	R13.3	XLOC_021669	best-15	chrIV:10829759-10832224	no	no
WBGene00009054	0.354312	-0.354312	0.0645741	0.999353	-0.407443	0.407443	0.0857	0.880211	F22D6.9	184829	I	F22D6.9	XLOC_000837	F22D6.9	chrI:7100016-7101723	no	yes
WBGene00011034	0.384802	-0.384802	0.126372	0.999353	-0.428163	0.428163	0.04395	0.775898	paxt-1	187613	I	R05D11.6	XLOC_001020	paxt-1	chrI:8596331-8598419	no	yes
WBGene00007093	0.376918	-0.376918	0.107922	0.999353	-0.42361	0.42361	0.0516	0.810986	B0001.8	178161	IV	B0001.8a	XLOC_021922	B0001.8	chrIV:12138999-12141025	no	yes
WBGene00017970	-0.774298	0.774298	0.0664366	0.999353	0.61241	-0.61241	0.0841	0.878693	F32A5.4	174188	II	F32A5.4a	XLOC_004972	F32A5.4	chrII:7229111-7230411	no	no
WBGene00002992	0.405836	-0.405836	0.0497795	0.999353	-0.378827	0.378827	0.1125	0.931285	lin-3	178001	IV	F36H1.4a	XLOC_014595	lin-3	chrIV:11057792-11063150	no	yes
WBGene00001182	-0.81646	0.81646	0.153867	0.999353	1.07894	-1.07894	0.03655	0.732312	egl-13	180833	X	T22B7.1a	XLOC_033837	egl-13	chrX:5668285-5673351	no	no
WBGene00011006	-0.423839	0.423839	0.0759124	0.999353	0.438393	-0.438393	0.0744	0.858007	ugt-47	187570	V	R04B5.9	XLOC_031108	ugt-47	chrV:10096306-10098552	no	no
WBGene00185098	0.428285	-0.428285	0.195174	0.999353	-0.633714	0.633714	0.02905	0.678935	Y71G12B.35	13179386	I	Y71G12B.35	XLOC_002005	Y71G12B.35	chrI:1672872-1676432	no	no
WBGene00013946	-0.470421	0.470421	0.0697415	0.999353	0.46302	-0.46302	0.0817	0.870451	ZK228.3	180200	V	ZK228.3	XLOC_032709	ZK228.3	chrV:18458285-18461203	no	yes
WBGene00206482	0.723554	-0.723554	0.133794	0.999353	-1.2721	1.2721	0.04275	0.774887	B0416.10	13222158	X	B0416.10	XLOC_037238	B0416.10	chrX:9273702-9274205	no	no
WBGene00018156	0.31509	-0.31509	0.0558476	0.999353	-0.3338	0.3338	0.10275	0.916298	ncbp-1	172345	I	F37E3.1	XLOC_000733	ncbp-1	chrI:6422107-6425555	no	yes
WBGene00013695	0.370777	-0.370777	0.0466748	0.999353	-0.341432	0.341432	0.12305	0.944163	epg-8	172847	I	Y106G6A.2a	XLOC_003158	epg-8	chrI:9931985-9934240	no	yes
WBGene00019158	0.370334	-0.370334	0.0840369	0.999353	-0.434078	0.434078	0.0687	0.855466	H05C05.2	175407	III	H05C05.2a	XLOC_010540	H05C05.2	chrIII:2962607-2965620	no	yes
WBGene00021818	0.368971	-0.368971	0.0704513	0.999353	-0.402067	0.402067	0.0823	0.873663	Y53G8B.2	175417	III	Y53G8B.2	XLOC_010549	Y53G8B.2	chrIII:3101393-3103930	no	yes
WBGene00022499	-0.742892	0.742892	0.110593	0.999353	0.705745	-0.705745	0.05245	0.818396	set-30	180772	X	ZC8.3	XLOC_033712	set-30	chrX:4999245-5003361	no	no
WBGene00017971	-0.507219	0.507219	0.0501865	0.999353	0.415429	-0.415429	0.11565	0.93777	F32A5.8	353400	II	F32A5.8	XLOC_004977	F32A5.8	chrII:7256980-7258071	no	no
WBGene00009641	0.464907	-0.464907	0.10386	0.999353	-0.524175	0.524175	0.05565	0.831877	F42G4.2	174949	II	F42G4.2	XLOC_005887	F42G4.2	chrII:13047916-13050688	no	no
WBGene00000150	-0.458598	0.458598	0.121794	0.999353	0.536157	-0.536157	0.04735	0.788362	apm-1	172180	I	F55A12.7	XLOC_002412	apm-1	chrI:5342483-5344707	no	no
WBGene00000991	-0.426183	0.426183	0.114268	0.999353	0.423738	-0.423738	0.05105	0.808856	dhs-28	180950	X	M03A8.1	XLOC_034077	dhs-28	chrX:6818405-6819950	no	yes
WBGene00008211	-0.483807	0.483807	0.0470535	0.999353	0.366105	-0.366105	0.1239	0.944937	C49F5.7	183615	X	C49F5.7	XLOC_034936	C49F5.7	chrX:11994780-11995714	no	yes
WBGene00015488	0.550962	-0.550962	0.144908	0.999353	-0.614627	0.614627	0.0402	0.760141	C05D11.13	182261	III	C05D11.13a	XLOC_011019	C05D11.13	chrIII:6443062-6443919	no	yes
WBGene00009058	-0.58498	0.58498	0.0962633	0.999353	0.602856	-0.602856	0.0608	0.845495	F22E12.1	179460	V	F22E12.1	XLOC_031191	F22E12.1	chrV:10454169-10457299	no	no
WBGene00007329	0.3197	-0.3197	0.0740231	0.999353	-0.346465	0.346465	0.0807	0.870451	C05C10.2	174546	II	C05C10.2a	XLOC_005410	C05C10.2	chrII:9922188-9930448	no	yes
WBGene00013165	0.536099	-0.536099	0.111728	0.999353	-0.583153	0.583153	0.05395	0.822527	Y53F4B.19	190218	II	Y53F4B.19	XLOC_006102	Y53F4B.19	chrII:15077196-15079365	no	yes
WBGene00020191	0.556517	-0.556517	0.325887	0.999353	-0.947417	0.947417	0.01845	0.596617	clec-53	171967	I	T03F1.10	XLOC_002216	clec-53	chrI:3871505-3873399	no	yes
WBGene00019396	0.436351	-0.436351	0.102743	0.999353	-0.430009	0.430009	0.0584	0.840117	K04F10.3	172334	I	K04F10.3a	XLOC_000722	K04F10.3	chrI:6358676-6360160	no	yes
WBGene00015051	0.438196	-0.438196	0.0492399	0.999353	-0.379479	0.379479	0.12245	0.943182	B0218.7	177614	IV	B0218.7	XLOC_021205	B0218.7	chrIV:8164647-8165881	no	no
WBGene00010137	0.545259	-0.545259	0.14842	0.999353	-0.67323	0.67323	0.0405	0.761836	ztf-26	172699	I	F55H12.6a	XLOC_002954	ztf-26	chrI:8853825-8861265	no	no
WBGene00235160	1.37037	-1.37037	0.420061	0.999353	-1.25835	1.25835	0.0144	0.554637	CD4.18	NA	V		XLOC_026816	CD4.18	chrV:5587268-5587402	no	yes
WBGene00010368	-0.865234	0.865234	0.059432	0.999353	0.640943	-0.640943	0.1021	0.91622	H06A10.1	186696	X	H06A10.1	XLOC_035176	H06A10.1	chrX:13507641-13509909	no	yes
WBGene00006379	0.540773	-0.540773	0.0935083	0.999353	-0.481224	0.481224	0.06495	0.846661	sys-1	172859	I	T23D8.9a	XLOC_003170	sys-1	chrI:9980483-9984776	no	yes
WBGene00022717	0.369301	-0.369301	0.0686553	0.999353	-0.350295	0.350295	0.08855	0.889202	hipr-1	176224	III	ZK370.3a	XLOC_009612	hipr-1	chrIII:8720122-8724930	no	yes
WBGene00001579	-0.406425	0.406425	0.0940419	0.999353	0.417932	-0.417932	0.0649	0.846661	gex-2	176885	IV	F56A11.1	XLOC_012058	gex-2	chrIV:572775-583351	no	yes
WBGene00006734	0.328243	-0.328243	0.0609713	0.999353	-0.325216	0.325216	0.09995	0.914482	ufd-2	174295	II	T05H10.5a	XLOC_005121	ufd-2	chrII:8062699-8065891	no	yes
WBGene00006736	0.307592	-0.307592	0.10581	0.999353	-0.379131	0.379131	0.0581	0.840117	ulp-1	175704	III	T10F2.3	XLOC_010843	ulp-1	chrIII:5166239-5169700	no	yes
WBGene00016058	0.447405	-0.447405	0.0795752	0.999353	-0.488549	0.488549	0.0772	0.864182	nspd-3	259569	IV	C24D10.7	XLOC_019901	nspd-3	chrIV:5162817-5163033	no	no
WBGene00001671	1.27005	-1.27005	0.0169312	0.682273	-1.51364	1.51364	0.36475	0.999956	gpa-9	191659	V		XLOC_031732	gpa-9	chrV:12646821-12649296	no	no
WBGene00007167	0.329946	-0.329946	0.0689023	0.999353	-0.34121	0.34121	0.09105	0.892323	rbg-3	175629	III	B0393.2	XLOC_009001	rbg-3	chrIII:4754583-4756745	no	yes
WBGene00004986	-0.510737	0.510737	0.112337	0.999353	0.517902	-0.517902	0.0559	0.832425	spp-1	176452	III	T07C4.4	XLOC_011653	spp-1	chrIII:10355047-10355423	no	yes
WBGene00007753	-0.51822	0.51822	0.0982551	0.999353	0.510505	-0.510505	0.06405	0.846661	C27A7.1	179663	V	C27A7.1a	XLOC_028082	C27A7.1	chrV:12131473-12137250	no	no
WBGene00009334	-0.367693	0.367693	0.107706	0.999353	0.437368	-0.437368	0.05865	0.840117	F32D8.12	179506	V	F32D8.12a	XLOC_031292	F32D8.12	chrV:10888743-10890974	no	yes
WBGene00022703	0.318565	-0.318565	0.0603679	0.999353	-0.342385	0.342385	0.10475	0.919557	ubxn-4	176187	III	ZK353.8	XLOC_011321	ubxn-4	chrIII:8403751-8405349	no	yes
WBGene00008133	-0.383392	0.383392	0.101063	0.999353	0.471027	-0.471027	0.0627	0.846661	efsc-1	173172	I	C47B2.7a	XLOC_001673	efsc-1	chrI:12978827-12982410	no	no
WBGene00020394	-1.29111	1.29111	0.0180001	0.706448	1.29129	-1.29129	0.35315	0.999956	T10B5.8	188353	V	T10B5.8	XLOC_026310	T10B5.8	chrV:1743375-2713617	no	yes
WBGene00006512	0.307307	-0.307307	0.0933582	0.999353	-0.365347	0.365347	0.06825	0.855466	abcf-1	179748	V	F18E2.2	XLOC_031756	abcf-1	chrV:12761170-12763343	no	yes
WBGene00001284	0.352292	-0.352292	0.0871592	0.999353	-0.388164	0.388164	0.07395	0.857307	emb-30	176322	III	F54C8.3	XLOC_011494	emb-30	chrIII:9435579-9441374	no	yes
WBGene00008200	-0.898347	0.898347	0.102106	0.999353	0.765827	-0.765827	0.06315	0.846661	C49C3.10	178518	IV	C49C3.10a	XLOC_026038	C49C3.10	chrIV:17336889-17338925	no	no
WBGene00022389	-0.366767	0.366767	0.11785	0.999353	0.448446	-0.448446	0.0548	0.823383	pde-6	190808	I	Y95B8A.10a	XLOC_001957	pde-6	chrI:873483-882716	no	no
WBGene00015987	0.471646	-0.471646	0.189145	0.999353	-0.696237	0.696237	0.0342	0.709793	C18G1.9	182799	V	C18G1.9	XLOC_030128	C18G1.9	chrV:4767906-4769681	no	no
WBGene00014261	-0.546849	0.546849	0.322382	0.999353	1.20823	-1.20823	0.0201	0.611167	shk-1	174536	II	ZK1321.2a	XLOC_005400	shk-1	chrII:9758194-9767928	no	no
WBGene00015512	-0.290659	0.290659	0.0546308	0.999353	0.309219	-0.309219	0.11945	0.939515	mthf-1	174254	II	C06A8.1a	XLOC_007401	mthf-1	chrII:7774088-7777697	no	yes
WBGene00010136	0.451908	-0.451908	0.0860682	0.999353	-0.467345	0.467345	0.07585	0.858924	F55H12.5	172700	I	F55H12.5	XLOC_001067	F55H12.5	chrI:8870099-8871469	no	yes
WBGene00001028	0.378956	-0.378956	0.0640769	0.999353	-0.366897	0.366897	0.1025	0.916298	dnj-10	176211	III	F22B7.5a	XLOC_009596	dnj-10	chrIII:8631094-8633254	no	yes
WBGene00011812	0.637687	-0.637687	0.158756	0.999353	-0.745685	0.745685	0.0411	0.763873	T16H12.2	188559	III	T16H12.2	XLOC_009820	T16H12.2	chrIII:10086210-10086968	no	yes
WBGene00012280	-0.653645	0.653645	0.0931556	0.999353	0.577131	-0.577131	0.0707	0.8566	W05E10.1	179602	V	W05E10.1	XLOC_031519	W05E10.1	chrV:11689507-11691602	no	no
WBGene00022668	-0.451215	0.451215	0.278474	0.999353	0.94176	-0.94176	0.0235	0.650042	ZK154.6	181040	X	ZK154.6a	XLOC_037002	ZK154.6	chrX:7790404-7793406	no	no
WBGene00001975	0.392168	-0.392168	0.108763	0.999353	-0.41391	0.41391	0.06055	0.845495	hmg-5	177543	IV	F45E4.9	XLOC_021113	hmg-5	chrIV:7645075-7646207	no	no
WBGene00010150	-0.88727	0.88727	0.0957759	0.999353	1.93141	-1.93141	0.06835	0.855466	F56D5.6	177773	IV	F56D5.6a	XLOC_014287	F56D5.6	chrIV:9402045-9412411	no	no
WBGene00219315	1.06121	-1.06121	0.070658	0.999353	-0.908839	0.908839	0.09285	0.897754	F07E5.12	13183846	II	F07E5.12	XLOC_004067	F07E5.12	chrII:2068361-2068976	no	no
WBGene00019167	0.506824	-0.506824	0.0779545	0.999353	-0.553543	0.553543	0.0848	0.878693	H06I04.1	175416	III	H06I04.1a	XLOC_008775	H06I04.1	chrIII:3091863-3100305	no	yes
WBGene00008431	0.318355	-0.318355	0.0845577	0.999353	-0.3954	0.3954	0.07815	0.866842	piga-1	174386	II	D2085.6	XLOC_007536	piga-1	chrII:8659824-8661538	no	no
WBGene00020047	-0.847976	0.847976	0.0802954	0.999353	0.701186	-0.701186	0.0826	0.87447	ttr-32	187854	III	R13A5.3	XLOC_009430	ttr-32	chrIII:7566504-7567361	no	yes
WBGene00011707	-0.697172	0.697172	0.208047	0.999353	1.32677	-1.32677	0.03185	0.708759	T11B7.2	188408	IV	T11B7.2a	XLOC_021306	T11B7.2	chrIV:8843607-8844478	no	no
WBGene00001853	0.357367	-0.357367	0.113807	0.999353	-0.442625	0.442625	0.05865	0.840117	hil-2	177390	IV	Y73B6BL.9a	XLOC_013590	hil-2	chrIV:6294264-6295062	no	yes
WBGene00017241	-0.39701	0.39701	0.0771554	0.999353	0.413877	-0.413877	0.08635	0.880211	pcyt-1	181021	X	F08C6.2a	XLOC_034225	pcyt-1	chrX:7570592-7580686	no	no
WBGene00016605	0.345747	-0.345747	0.225564	0.999353	-0.70781	0.70781	0.02955	0.683217	C43E11.5	172022	I	C43E11.5	XLOC_000427	C43E11.5	chrI:4237034-4238560	no	no
WBGene00011490	0.351558	-0.351558	0.175479	0.999353	-0.490061	0.490061	0.0383	0.747425	T05F1.4	172807	I	T05F1.4	XLOC_001175	T05F1.4	chrI:9631387-9632187	no	yes
WBGene00012228	-0.57601	0.57601	0.0663195	0.999353	0.499794	-0.499794	0.10185	0.91622	W03H9.2	175068	II		XLOC_008358	W03H9.2	chrII:14142873-14143747	no	yes
WBGene00017025	0.386335	-0.386335	0.0841354	0.999353	-0.427493	0.427493	0.08025	0.870451	D1037.1	171936	I	D1037.1	XLOC_000356	D1037.1	chrI:3684804-3690050	no	yes
WBGene00017364	-0.754586	0.754586	0.104844	0.999353	0.667633	-0.667633	0.0643	0.846661	clec-7	184314	V	F10G2.3	XLOC_027127	clec-7	chrV:7328396-7329799	no	no
WBGene00003668	1.17711	-1.17711	0.0158346	0.660908	-1.03967	1.03967	0.4284	0.999956	nhr-78	191727	IV	F36A4.14	XLOC_019540	nhr-78	chrIV:1956724-4526957	no	yes
WBGene00011129	0.537672	-0.537672	0.43906	0.999353	-1.32686	1.32686	0.0155	0.574334	R07H5.9	187690	IV	R07H5.9	XLOC_014620	R07H5.9	chrIV:11207508-11209120	no	no
WBGene00007073	-0.742697	0.742697	0.114643	0.999353	0.672732	-0.672732	0.0596	0.842822	ugt-2	179450	V	AC3.8	XLOC_027679	ugt-2	chrV:10398786-10401199	no	no
WBGene00009350	-0.933812	0.933812	0.128818	0.999353	0.906217	-0.906217	0.05305	0.818396	F32H5.4	185216	V	F32H5.4	XLOC_028311	F32H5.4	chrV:13361190-13363276	no	no
WBGene00022754	0.40962	-0.40962	0.111033	0.999353	-0.511126	0.511126	0.06185	0.846661	nspd-1	172292	I	ZK484.8	XLOC_002544	nspd-1	chrI:6097580-6097793	no	yes
WBGene00018467	-0.534338	0.534338	0.0901927	0.999353	0.530006	-0.530006	0.07625	0.860956	sdpn-1	181058	X	F45E1.7a	XLOC_037036	sdpn-1	chrX:7989147-7998048	no	no
WBGene00017010	0.419447	-0.419447	0.0814778	0.999353	-0.443251	0.443251	0.0852	0.880211	D1007.15	172058	I	D1007.15a	XLOC_000458	D1007.15	chrI:4557691-4563644	no	no
WBGene00022279	-0.394634	0.394634	0.116783	0.999353	0.453527	-0.453527	0.0596	0.842822	sesn-1	171593	I	Y74C9A.5	XLOC_001893	sesn-1	chrI:28279-32482	no	no
WBGene00017079	0.368496	-0.368496	0.0731214	0.999353	-0.370486	0.370486	0.09535	0.901565	D2096.12	3565193	IV	D2096.12	XLOC_014129	D2096.12	chrIV:8363451-8366087	no	yes
WBGene00003472	0.350108	-0.350108	0.0834929	0.999353	-0.347114	0.347114	0.08385	0.878693	mtk-1	172246	I	B0414.7a	XLOC_002494	mtk-1	chrI:5795566-5801289	no	yes
WBGene00020964	0.330853	-0.330853	0.0662555	0.999353	-0.334507	0.334507	0.10555	0.919557	polq-1	175810	III	W03A3.2	XLOC_010918	polq-1	chrIII:5791233-5802997	no	yes
WBGene00008993	-0.618851	0.618851	0.0833017	0.999353	0.551028	-0.551028	0.08445	0.878693	F21A3.3	184748	V	F21A3.3	XLOC_028710	F21A3.3	chrV:15512836-15521987	no	yes
WBGene00007478	0.596553	-0.596553	0.230064	0.999353	-0.899471	0.899471	0.0306	0.690357	C09F9.1	182455	II	C09F9.1	XLOC_006066	C09F9.1	chrII:14698750-14699236	no	no
WBGene00002189	-0.454991	0.454991	0.0546435	0.999353	0.377659	-0.377659	0.1293	0.946623	kin-1	3565407	I	ZK909.2a	XLOC_001875	kin-1	chrI:14919523-14951556	no	no
WBGene00017789	-0.508287	0.508287	0.267872	0.999353	0.764463	-0.764463	0.0269	0.665615	F25E5.8	184927	V	F25E5.8a	XLOC_027147	F25E5.8	chrV:7435922-7436885	no	yes
WBGene00001621	-0.595264	0.595264	0.141318	0.999353	0.639838	-0.639838	0.05095	0.808856	glt-3	177882	IV	K08F4.4	XLOC_014427	glt-3	chrIV:10130373-10133124	no	yes
WBGene00010875	0.40206	-0.40206	0.126604	0.999353	-0.402495	0.402495	0.05675	0.836568	M05D6.2	174353	II	M05D6.2	XLOC_005193	M05D6.2	chrII:8468071-8469929	no	yes
WBGene00007474	-0.572765	0.572765	0.141513	0.999353	0.600352	-0.600352	0.05035	0.804994	C08H9.15	3564883	II	C08H9.15	XLOC_005407	C08H9.15	chrII:9881162-9882292	no	yes
WBGene00003601	0.514343	-0.514343	0.0711187	0.999353	-0.453025	0.453025	0.10065	0.914482	nhr-2	172251	I	C32F10.6	XLOC_002498	nhr-2	chrI:5818874-5821111	no	yes
WBGene00015029	0.312272	-0.312272	0.121406	0.999353	-0.416157	0.416157	0.05955	0.842822	B0207.6	172267	I	B0207.6	XLOC_002515	B0207.6	chrI:5935538-5936946	no	yes
WBGene00016441	-0.719764	0.719764	0.111981	0.999353	0.679438	-0.679438	0.0636	0.846661	C35D10.3	183237	III	C35D10.3	XLOC_009029	C35D10.3	chrIII:4868893-4870060	no	yes
WBGene00003252	0.620137	-0.620137	0.144675	0.999353	-0.718536	0.718536	0.04985	0.803986	mig-21	184064	III	F01F1.13a	XLOC_010930	mig-21	chrIII:5876974-5878437	no	yes
WBGene00015126	0.34742	-0.34742	0.0608203	0.999353	-0.345079	0.345079	0.1187	0.939515	B0303.4	176218	III	B0303.4	XLOC_009607	B0303.4	chrIII:8689879-8692863	no	yes
WBGene00015378	0.504665	-0.504665	0.117596	0.999353	-0.553768	0.553768	0.06155	0.846661	C03B1.7	182149	X	C03B1.7a	XLOC_033995	C03B1.7	chrX:6341798-6345609	no	no
WBGene00015168	-0.315144	0.315144	0.0595929	0.999353	0.306414	-0.306414	0.1204	0.939515	pdi-6	180974	X	B0403.4	XLOC_036866	pdi-6	chrX:7066494-7068396	no	no
WBGene00001653	0.339316	-0.339316	0.0898995	0.999353	-0.350651	0.350651	0.07985	0.870451	gon-4	177899	IV	K04D7.5a	XLOC_014446	gon-4	chrIV:10197797-10202901	no	no
WBGene00017869	-1.33306	1.33306	0.0674511	0.999353	0.869396	-0.869396	0.1071	0.924804	F28A10.1	185027	II	F28A10.1	XLOC_003875	F28A10.1	chrII:825868-827507	no	no
WBGene00001978	0.303255	-0.303255	0.064792	0.999353	-0.317985	0.317985	0.11275	0.931285	hmp-1	179624	V	R13H4.4a	XLOC_028022	hmp-1	chrV:11845858-11851751	no	yes
WBGene00006044	0.47346	-0.47346	0.0735435	0.999353	-0.481252	0.481252	0.09925	0.914482	ssp-16	172294	I	T27A3.3	XLOC_000664	ssp-16	chrI:6102068-6102398	no	yes
WBGene00017775	-0.311707	0.311707	0.125663	0.999353	0.39919	-0.39919	0.05785	0.840117	F25B5.3	175843	III	F25B5.3a	XLOC_009198	F25B5.3	chrIII:5948853-5953173	no	yes
WBGene00012560	0.619128	-0.619128	0.0102011	0.521124	-0.454366	0.454366	0.7141	0.999956	Y37D8A.25	3565405	III	Y37D8A.25	XLOC_011889	Y37D8A.25	chrIII:12784715-13607695	no	yes
WBGene00015425	0.316047	-0.316047	0.066106	0.999353	-0.32227	0.32227	0.1102	0.931285	C04E6.11	178978	V	C04E6.11	XLOC_030324	C04E6.11	chrV:5914209-5917793	no	no
WBGene00219979	-0.883567	0.883567	0.435256	0.999353	0.887238	-0.887238	0.01685	0.594241	F56A12.11	NA	V		XLOC_032029	F56A12.11	chrV:14359093-14359238	no	yes
WBGene00011112	-0.642628	0.642628	0.162686	0.999353	0.604611	-0.604611	0.04555	0.780316	R07E5.4	175568	III	R07E5.4	XLOC_008925	R07E5.4	chrIII:4394767-4396298	no	no
WBGene00020715	0.570263	-0.570263	0.0155514	0.659193	-0.232611	0.232611	0.4779	0.999956	nspd-4	173835	II	T23B7.1	XLOC_004491	nspd-4	chrII:4842603-4842819	no	no
WBGene00006438	-0.401173	0.401173	0.106399	0.999353	0.45569	-0.45569	0.0705	0.856312	nrfl-1	177736	IV	C01F6.6a	XLOC_014239	nrfl-1	chrIV:9119085-9129918	no	yes
WBGene00009450	-0.356242	0.356242	0.0649924	0.999353	0.351407	-0.351407	0.1159	0.93777	ugt-58	174507	II	F35H8.6	XLOC_007703	ugt-58	chrII:9584433-9586717	no	yes
WBGene00009441	0.301013	-0.301013	0.0942836	0.999353	-0.359682	0.359682	0.07985	0.870451	wdr-48	175600	III	F35G12.4a	XLOC_008963	wdr-48	chrIII:4578849-4581533	no	yes
WBGene00017432	2.22625	-2.22625	0.00751813	0.422004	-2.81603	2.81603	1	1	F13H6.4	NA	V		XLOC_030404	F13H6.4	chrV:6366415-6367995	no	no
WBGene00002044	-0.389184	0.389184	0.0846966	0.999353	0.423953	-0.423953	0.0889	0.889924	hyl-2	180743	X	K02G10.6	XLOC_036454	hyl-2	chrX:4697217-4699431	no	no
WBGene00016846	0.850259	-0.850259	0.0371018	0.932056	-0.455068	0.455068	0.20265	0.999956	C50F7.6	177553	IV	C50F7.6a	XLOC_021129	C50F7.6	chrIV:7720621-7723186	no	no
WBGene00004993	-0.455685	0.455685	0.0684709	0.999353	0.369943	-0.369943	0.10975	0.931285	spp-8	177652	IV	C28C12.5	XLOC_014141	spp-8	chrIV:8481652-8483521	no	no
WBGene00009397	-0.672076	0.672076	0.172209	0.999353	0.749779	-0.749779	0.04345	0.775898	clec-66	174929	II	F35C5.9	XLOC_005871	clec-66	chrII:12904349-12906476	no	no
WBGene00002222	0.71993	-0.71993	0.46605	0.999353	2.63594	-2.63594	0.01625	0.58545	klp-11	177685	IV	F20C5.2a	XLOC_021291	klp-11	chrIV:8755266-8761983	no	yes
WBGene00003368	-0.599665	0.599665	0.141638	0.999353	0.682066	-0.682066	0.05415	0.822652	mkk-4	185682	X	F42G10.2	XLOC_034621	mkk-4	chrX:10027802-10029599	no	no
WBGene00002072	0.291336	-0.291336	0.0683044	0.999353	-0.31386	0.31386	0.11285	0.931285	ima-1	179555	V	T19B10.7	XLOC_027864	ima-1	chrV:11239687-11241451	no	yes
WBGene00011706	-0.43991	0.43991	0.0857625	0.999353	0.432278	-0.432278	0.0905	0.892323	T11B7.1	177698	IV	T11B7.1	XLOC_014191	T11B7.1	chrIV:8840711-8842559	no	no
WBGene00001774	-0.38273	0.38273	0.0774376	0.999353	0.398853	-0.398853	0.10045	0.914482	gst-26	190223	II	Y53F4B.29	XLOC_008452	gst-26	chrII:15163788-15164467	no	yes
WBGene00022830	0.320561	-0.320561	0.0809391	0.999353	-0.332883	0.332883	0.09725	0.910908	ZK973.1	172040	I	ZK973.1	XLOC_000444	ZK973.1	chrI:4382565-4385098	no	yes
WBGene00001644	-0.820798	0.820798	0.0870904	0.999353	0.65143	-0.65143	0.0906	0.892323	gly-19	172447	I	F22D6.12	XLOC_000841	gly-19	chrI:7113015-7114849	no	no
WBGene00017372	0.35182	-0.35182	0.11404	0.999353	-0.401461	0.401461	0.06985	0.856312	F10G7.9	173810	II	F10G7.9a	XLOC_006818	F10G7.9	chrII:4703480-4706359	no	yes
WBGene00015797	0.774916	-0.774916	0.0155888	0.659193	-0.244931	0.244931	0.51265	0.999956	C15F1.8	174142	II	C15F1.8	XLOC_007274	C15F1.8	chrII:6976767-6977325	no	yes
WBGene00007620	0.319053	-0.319053	0.104076	0.999353	-0.361786	0.361786	0.0769	0.8633	ocrl-1	172822	I	C16C2.3a	XLOC_003124	ocrl-1	chrI:9715623-9728099	no	yes
WBGene00009299	0.598824	-0.598824	0.142779	0.999353	-0.665019	0.665019	0.0562	0.833397	F31E9.6	180145	V	F31E9.6	XLOC_032567	F31E9.6	chrV:17313692-17315087	no	no
WBGene00014163	0.251309	-0.251309	0.160599	0.999353	-0.430504	0.430504	0.04995	0.80419	rnh-1.2	191471	II	ZK938.7	XLOC_007755	rnh-1.2	chrII:9839709-9841962	no	no
WBGene00004917	0.344235	-0.344235	0.0402751	0.966637	-0.299017	0.299017	0.1999	0.999956	snr-4	179639	V	C52E4.3	XLOC_031582	snr-4	chrV:11978667-11979677	no	yes
WBGene00001259	0.317067	-0.317067	0.0653292	0.999353	-0.309519	0.309519	0.12405	0.944937	emb-5	175621	III	T04A8.14	XLOC_010761	emb-5	chrIII:4715551-4720630	no	yes
WBGene00001563	0.308723	-0.308723	0.10119	0.999353	-0.368119	0.368119	0.0816	0.870451	gei-6	179114	V	C05C8.4	XLOC_030596	gei-6	chrV:7226518-7230827	no	yes
WBGene00020941	1.21391	-1.21391	0.0216444	0.749801	-1.1456	1.1456	0.3863	0.999956	W02D7.5	189117	V	W02D7.5	XLOC_030795	W02D7.5	chrV:7731614-8569933	no	yes
WBGene00008266	0.318643	-0.318643	0.108666	0.999353	-0.379089	0.379089	0.0771	0.863889	C53A5.6	183737	V	C53A5.6a	XLOC_032074	C53A5.6	chrV:14543703-14545806	no	yes
WBGene00019665	1.04065	-1.04065	0.0102075	0.521124	0.128262	-0.128262	0.81725	0.999956	K11H12.9	176889	IV	K11H12.9a	XLOC_012068	K11H12.9	chrIV:649665-651792	no	yes
WBGene00219949	0.962733	-0.962733	0.117307	0.999353	-0.818967	0.818967	0.0703	0.856312	F44E5.16	NA	II		XLOC_005716	F44E5.16	chrII:11756721-11756854	no	yes
WBGene00009163	0.340098	-0.340098	0.0971414	0.999353	-0.355333	0.355333	0.08535	0.880211	drsh-1	172830	I	F26E4.10a	XLOC_003139	drsh-1	chrI:9781461-9785713	no	yes
WBGene00007159	0.405371	-0.405371	0.102281	0.999353	-0.459688	0.459688	0.0816	0.870451	B0379.7	172871	I	B0379.7	XLOC_003184	B0379.7	chrI:10072613-10074018	no	yes
WBGene00007627	0.383258	-0.383258	0.224755	0.999353	-0.456889	0.456889	0.03735	0.737233	ccdc-55	175533	III	C16C10.6	XLOC_010680	ccdc-55	chrIII:4167024-4168739	no	yes
WBGene00003391	0.372021	-0.372021	0.122716	0.999353	-0.386089	0.386089	0.0684	0.855466	mog-3	175730	III	F52C9.7	XLOC_009102	mog-3	chrIII:5308562-5311038	no	yes
WBGene00020779	0.33152	-0.33152	0.221039	0.999353	-0.443434	0.443434	0.03785	0.743335	T24G10.2	175747	III	T24G10.2	XLOC_010875	T24G10.2	chrIII:5441109-5442690	no	yes
WBGene00021531	1.09494	-1.09494	0.0367895	0.93195	-0.523707	0.523707	0.22395	0.999956	Y42G9A.1	175867	III	Y42G9A.1	XLOC_009225	Y42G9A.1	chrIII:6149963-6154681	no	yes
WBGene00015582	0.733304	-0.733304	0.118947	0.999353	-0.915202	0.915202	0.0695	0.856312	C07H6.9	176062	III	C07H6.9a	XLOC_011175	C07H6.9	chrIII:7498766-7499381	no	yes
WBGene00011299	0.361429	-0.361429	0.082489	0.999353	-0.356352	0.356352	0.1006	0.914482	ikke-1	176278	III	R107.4a	XLOC_011437	ikke-1	chrIII:9046276-9050614	no	yes
WBGene00044586	1.06492	-1.06492	0.148554	0.999353	-1.44263	1.44263	0.0565	0.835301	Y61A9LA.12	3896864	V	Y61A9LA.12	XLOC_026669	Y61A9LA.12	chrV:4553857-4554484	no	no
WBGene00003697	-0.733084	0.733084	0.217908	0.999353	0.972093	-0.972093	0.0386	0.748021	nhr-107	179083	V	C33G8.11	XLOC_030543	nhr-107	chrV:6995241-6997051	no	no
WBGene00017786	-0.535144	0.535144	0.196174	0.999353	0.694603	-0.694603	0.0429	0.774887	F25E5.5	3565479	V	F25E5.5	XLOC_027151	F25E5.5	chrV:7447256-7448865	no	no
WBGene00017717	-0.624173	0.624173	0.0707943	0.999353	0.519756	-0.519756	0.1164	0.938324	F22F4.4	180867	X	F22F4.4	XLOC_036663	F22F4.4	chrX:5998390-6000400	no	no
WBGene00003727	-0.887269	0.887269	0.127961	0.999353	0.886262	-0.886262	0.06475	0.846661	nhr-137	183865	X	C56E10.4a	XLOC_036785	nhr-137	chrX:6661871-6668806	no	no
WBGene00009628	-0.398023	0.398023	0.0770765	0.999353	0.382322	-0.382322	0.10685	0.924804	tatn-1	181574	X	F42D1.2	XLOC_035379	tatn-1	chrX:14790989-14792574	no	no
WBGene00021928	-0.995554	0.995554	0.0149718	0.646155	0.781553	-0.781553	0.5601	0.999956	Y55F3AM.11	190309	IV	Y55F3AM.11	XLOC_019206	Y55F3AM.11	chrIV:858931-1921342	no	no
WBGene00023407	-0.350825	0.350825	0.268138	0.999353	0.613167	-0.613167	0.0306	0.690357	cex-1	186376	II	F56D1.6	XLOC_004601	cex-1	chrII:5447665-5448423	no	no
WBGene00006445	0.816695	-0.816695	0.090233	0.999353	-0.756695	0.756695	0.0912	0.892323	tag-68	172930	I	F37D6.6	XLOC_001313	tag-68	chrI:10501729-10505435	no	no
WBGene00016421	0.335822	-0.335822	0.0774228	0.999353	-0.340416	0.340416	0.1104	0.931285	cdc-7	172260	I	C34G6.5	XLOC_000631	cdc-7	chrI:5872187-5874135	no	yes
WBGene00017163	-0.287801	0.287801	0.0566764	0.999353	0.281044	-0.281044	0.1511	0.972535	dnpp-1	175822	III	F01F1.9a	XLOC_010925	dnpp-1	chrIII:5861946-5863502	no	yes
WBGene00016292	-0.47685	0.47685	0.157365	0.999353	0.564801	-0.564801	0.0547	0.823383	tbc-7	180784	X	C31H2.1a	XLOC_033743	tbc-7	chrX:5138985-5146255	no	no
WBGene00011637	0.364794	-0.364794	0.123607	0.999353	-0.387039	0.387039	0.0699	0.856312	sds-22	174266	II	T09A5.9	XLOC_005093	sds-22	chrII:7858367-7859626	no	yes
WBGene00021482	0.35355	-0.35355	0.069441	0.999353	-0.341017	0.341017	0.12525	0.944937	Y39H10A.6	178791	V	Y39H10A.6a	XLOC_029985	Y39H10A.6	chrV:3750206-3755782	no	yes
WBGene00006839	-0.370437	0.370437	0.0615441	0.999353	0.332686	-0.332686	0.14145	0.959842	unc-115	181227	X	F09B9.2a	XLOC_034645	unc-115	chrX:10147432-10152057	no	yes
WBGene00014243	0.319708	-0.319708	0.0738907	0.999353	-0.311761	0.311761	0.1172	0.938642	dcaf-1	177804	IV	ZK1251.9a	XLOC_021456	dcaf-1	chrIV:9697238-9706701	no	yes
WBGene00185102	1.58293	-1.58293	0.0792597	0.999353	-2.08728	2.08728	0.1096	0.931285	Y105C5A.1268	13206052	IV	Y105C5A.1268	XLOC_024377	Y105C5A.1268	chrIV:15646120-15646401	no	yes
WBGene00016566	0.372895	-0.372895	0.152684	0.999353	-0.433939	0.433939	0.0568	0.836568	eri-7	172047	I	C41D11.7	XLOC_002295	eri-7	chrI:4451505-4456806	no	yes
WBGene00003958	-0.332902	0.332902	0.0728908	0.999353	0.333525	-0.333525	0.11955	0.939515	pcp-3	177740	IV	F23B2.11	XLOC_021358	pcp-3	chrIV:9155248-9159000	no	no
WBGene00013881	0.361589	-0.361589	0.112928	0.999353	-0.392627	0.392627	0.07745	0.865326	mans-4	177726	IV	ZC410.3a	XLOC_021340	mans-4	chrIV:9076578-9078468	no	yes
WBGene00016758	-0.586366	0.586366	0.221271	0.999353	0.797406	-0.797406	0.0395	0.753266	C49A9.4	3565549	IV	C49A9.4	XLOC_013551	C49A9.4	chrIV:6219714-6221837	no	no
WBGene00010047	-0.448586	0.448586	0.189404	0.999353	0.57851	-0.57851	0.0469	0.784503	F54D1.6	178037	IV	F54D1.6	XLOC_014632	F54D1.6	chrIV:11287794-11294297	no	yes
WBGene00012854	-0.895153	0.895153	0.103354	0.999353	0.708699	-0.708699	0.0859	0.880211	Y44A6D.3	189900	V	Y44A6D.3a	XLOC_032977	Y44A6D.3	chrV:20791002-20792372	no	no
WBGene00006772	0.771415	-0.771415	0.0201548	0.749184	-0.678149	0.678149	0.44	0.999956	unc-36	176155	III	C50C3.9a	XLOC_011275	unc-36	chrIII:8193970-8201035	no	no
WBGene00000878	0.383909	-0.383909	0.0816822	0.999353	-0.372139	0.372139	0.10935	0.931285	cyn-2	176807	III	ZK520.5	XLOC_010208	cyn-2	chrIII:13692630-13693590	no	yes
WBGene00003912	0.27951	-0.27951	0.0766439	0.999353	-0.321827	0.321827	0.11685	0.938324	pal-1	175638	III	C38D4.6a	XLOC_010776	pal-1	chrIII:4805175-4808673	no	yes
WBGene00022792	0.332166	-0.332166	0.117841	0.999353	-0.362919	0.362919	0.07605	0.860357	ZK686.2	176088	III	ZK686.2	XLOC_011207	ZK686.2	chrIII:7763767-7765984	no	no
WBGene00003986	-0.342119	0.342119	0.0690771	0.999353	0.346367	-0.346367	0.1302	0.946816	mct-4	180766	X	K05B2.5a	XLOC_036485	mct-4	chrX:4921906-4929720	no	no
WBGene00008802	0.695386	-0.695386	0.215068	0.999353	-0.835474	0.835474	0.04205	0.774887	acp-2	174343	II	F14E5.4	XLOC_007501	acp-2	chrII:8429999-8431862	no	yes
WBGene00016849	0.777761	-0.777761	0.139872	0.999353	-0.753896	0.753896	0.06465	0.846661	acs-21	178751	V	C50H11.1	XLOC_026478	acs-21	chrV:3089071-3091258	no	no
WBGene00021667	-0.3318	0.3318	0.111866	0.999353	0.396155	-0.396155	0.08115	0.870451	snpc-3.2	171615	I	Y48G1BM.1	XLOC_000026	snpc-3.2	chrI:252118-254129	no	yes
WBGene00022434	0.360319	-0.360319	0.190263	0.999353	-0.477494	0.477494	0.04865	0.796703	Y108G3AL.2	178546	V	Y108G3AL.2	XLOC_026087	Y108G3AL.2	chrV:163887-172204	no	yes
WBGene00000270	0.311765	-0.311765	0.126122	0.999353	-0.418843	0.418843	0.0726	0.8566	bre-5	178142	IV	T12G3.8a	XLOC_021902	bre-5	chrIV:12049909-12051174	no	yes
WBGene00016888	0.316113	-0.316113	0.082315	0.999353	-0.339741	0.339741	0.11245	0.931285	C52E12.1	174148	II	C52E12.1	XLOC_004934	C52E12.1	chrII:7025771-7029842	no	yes
WBGene00011758	0.36995	-0.36995	0.14165	0.999353	-0.394005	0.394005	0.06515	0.846661	T13H5.4	174364	II	T13H5.4	XLOC_007514	T13H5.4	chrII:8523569-8525343	no	yes
WBGene00044544	-1.07776	1.07776	0.0591127	0.999353	0.795309	-0.795309	0.15555	0.976268	F26F12.8	3896849	V	F26F12.8	XLOC_030316	F26F12.8	chrV:5854834-5855305	no	no
WBGene00015400	0.509334	-0.509334	0.181037	0.999353	-0.542029	0.542029	0.0506	0.804994	cyp-35A2	182177	V	C03G6.15	XLOC_030617	cyp-35A2	chrV:7362393-7364154	no	no
WBGene00012615	0.316158	-0.316158	0.15453	0.999353	-0.374118	0.374118	0.05905	0.840117	dct-16	180345	V	Y38H6C.1a	XLOC_032931	dct-16	chrV:20497951-20498977	no	no
WBGene00003448	0.344696	-0.344696	0.0896617	0.999353	-0.379061	0.379061	0.1017	0.91622	msp-55	177272	IV	C09B9.6	XLOC_019818	msp-55	chrIV:5055622-5056006	no	no
WBGene00010444	0.301187	-0.301187	0.0928737	0.999353	-0.363375	0.363375	0.09875	0.914482	magi-1	178107	IV	K01A6.2a	XLOC_014712	magi-1	chrIV:11715066-11728974	no	no
WBGene00020533	-0.667474	0.667474	0.258273	0.999353	0.884764	-0.884764	0.0357	0.721954	T16A1.2	188542	II	T16A1.2	XLOC_004070	T16A1.2	chrII:2095308-2098675	no	no
WBGene00018041	0.610583	-0.610583	0.103688	0.999353	-0.618057	0.618057	0.08925	0.890642	F35D2.3	174229	II	F35D2.3	XLOC_005029	F35D2.3	chrII:7570558-7571990	no	no
WBGene00000968	-1.0125	1.0125	0.173937	0.999353	1.04437	-1.04437	0.05305	0.818396	dhs-4	172810	I	T05F1.10	XLOC_003109	dhs-4	chrI:9647677-9649177	no	no
WBGene00022786	0.5979	-0.5979	0.251225	0.999353	-1.17702	1.17702	0.03665	0.732312	ZK652.8	191377	III	ZK652.8	XLOC_011221	ZK652.8	chrIII:7842727-7843570	no	no
WBGene00018836	0.372482	-0.372482	0.115522	0.999353	-0.417418	0.417418	0.08035	0.870451	F54F2.9	176241	III	F54F2.9	XLOC_011395	F54F2.9	chrIII:8825273-8827146	no	yes
WBGene00015471	-0.776339	0.776339	0.16246	0.999353	0.827424	-0.827424	0.05735	0.839072	lmp-2	180467	X	C05D9.2	XLOC_033102	lmp-2	chrX:1125759-1128217	no	no
WBGene00019168	0.336976	-0.336976	0.0713028	0.999353	-0.320337	0.320337	0.13105	0.948958	H06I04.3	175414	III	H06I04.3a	XLOC_008773	H06I04.3	chrIII:3070543-3085040	no	yes
WBGene00001090	0.315485	-0.315485	0.0795657	0.999353	-0.326065	0.326065	0.11785	0.93935	drh-1	177425	IV	F15B10.2a	XLOC_020857	drh-1	chrIV:6607545-6613337	no	yes
WBGene00017108	-0.499356	0.499356	0.120759	0.999353	0.533941	-0.533941	0.0781	0.866842	cyp-43A1	180838	X	E03E2.1	XLOC_033843	cyp-43A1	chrX:5714548-5717472	no	yes
WBGene00002231	0.319306	-0.319306	0.0816906	0.999353	-0.318572	0.318572	0.11565	0.93777	knl-1	176164	III	C02F5.1	XLOC_009536	knl-1	chrIII:8250564-8253872	no	yes
WBGene00001035	0.518539	-0.518539	0.0132156	0.601577	-0.50622	0.50622	0.71575	0.999956	dnj-17	176761	III	T03F6.2	XLOC_011934	dnj-17	chrIII:12784715-13607695	no	yes
WBGene00015660	-0.822848	0.822848	0.0186677	0.719324	0.863069	-0.863069	0.5055	0.999956	catp-3	179189	V	C09H5.2a	XLOC_027256	catp-3	chrV:7731614-8569933	no	no
WBGene00002147	0.286829	-0.286829	0.0840065	0.999353	-0.32646	0.32646	0.1132	0.931454	ire-1	174305	II	C41C4.4a	XLOC_007458	ire-1	chrII:8112617-8124788	no	yes
WBGene00012113	-0.737976	0.737976	0.0146723	0.639824	0.62279	-0.62279	0.6474	0.999956	T28B8.1	172599	I	T28B8.1	XLOC_000970	T28B8.1	chrI:7741935-8394405	no	yes
WBGene00014053	-0.637029	0.637029	0.15595	0.999353	0.659434	-0.659434	0.0614	0.846661	ZK669.3	191388	II	ZK669.3	XLOC_005105	ZK669.3	chrII:7941119-7942514	no	yes
WBGene00007226	0.339144	-0.339144	0.150893	0.999353	-0.497058	0.497058	0.0633	0.846661	C01G6.4	182077	II	C01G6.4	XLOC_007645	C01G6.4	chrII:9271665-9272964	no	yes
WBGene00007639	1.07674	-1.07674	0.18083	0.999353	-1.30484	1.30484	0.05295	0.818396	C17D12.5	173043	I	C17D12.5	XLOC_001466	C17D12.5	chrI:11586241-11587285	no	yes
WBGene00044443	1.20861	-1.20861	0.0817961	0.999353	-0.922364	0.922364	0.11665	0.938324	ZC21.10	3896746	III	ZC21.10	XLOC_009579	ZC21.10	chrIII:8530001-8531044	no	no
WBGene00009504	-0.635281	0.635281	0.216977	0.999353	0.921522	-0.921522	0.0442	0.775919	F37B12.1	185416	II	F37B12.1	XLOC_007608	F37B12.1	chrII:9027291-9029196	no	no
WBGene00006520	-0.434795	0.434795	0.0451941	0.999353	0.305511	-0.305511	0.21295	0.999956	tag-175	183942	II	D2013.10	XLOC_005333	tag-175	chrII:9323900-9324641	no	yes
WBGene00022168	0.319777	-0.319777	0.0669587	0.999353	-0.316963	0.316963	0.14445	0.963997	Y71H2AM.3	190606	III	Y71H2AM.3	XLOC_008746	Y71H2AM.3	chrIII:2805422-2810994	no	yes
WBGene00001584	0.330716	-0.330716	0.109924	0.999353	-0.346564	0.346564	0.0883	0.888998	nrde-4	177544	IV	F45E4.10a	XLOC_021114	nrde-4	chrIV:7646407-7654202	no	yes
WBGene00021704	-0.652662	0.652662	0.0141989	0.625699	0.541725	-0.541725	0.68525	0.999956	Y48G9A.11	190056	III	Y48G9A.11	XLOC_010473	Y48G9A.11	chrIII:1545026-2217085	no	yes
WBGene00012623	0.451615	-0.451615	0.202488	0.999353	-0.642234	0.642234	0.04825	0.795717	fbxa-149	NA	V		XLOC_032935	fbxa-149	chrV:20516268-20518005	no	no
WBGene00014997	0.937381	-0.937381	0.138603	0.999353	-0.810322	0.810322	0.07045	0.856312	AC7.3	181802	IV	AC7.3	XLOC_012775	AC7.3	chrIV:5111830-5112867	no	no
WBGene00008684	0.385085	-0.385085	0.119947	0.999353	-0.417296	0.417296	0.0819	0.871788	mig-32	178150	IV	F11A10.3a	XLOC_021911	mig-32	chrIV:12089452-12092191	no	yes
WBGene00022618	0.297803	-0.297803	0.214283	0.999353	-0.446397	0.446397	0.0462	0.7806	ZC477.3	177484	IV	ZC477.3a	XLOC_013892	ZC477.3	chrIV:7103550-7104864	no	yes
WBGene00009714	0.520698	-0.520698	0.109021	0.999353	-0.532289	0.532289	0.0913	0.892323	F44G4.5	185761	II	F44G4.5	XLOC_007602	F44G4.5	chrII:8999718-9000311	no	yes
WBGene00019005	0.399889	-0.399889	0.11726	0.999353	-0.421827	0.421827	0.08425	0.878693	F57B10.8	172368	I	F57B10.8	XLOC_002621	F57B10.8	chrI:6548801-6550351	no	yes
WBGene00010620	0.325429	-0.325429	0.134391	0.999353	-0.361217	0.361217	0.07355	0.856643	K07A12.1	172669	I	K07A12.1	XLOC_001038	K07A12.1	chrI:8666588-8669688	no	yes
WBGene00008119	0.367237	-0.367237	0.0974284	0.999353	-0.35963	0.35963	0.10205	0.91622	C46F11.4	175469	III	C46F11.4	XLOC_010613	C46F11.4	chrIII:3657793-3664280	no	yes
WBGene00003577	-0.35228	0.35228	0.0874825	0.999353	0.354932	-0.354932	0.11415	0.933533	ndg-4	175582	III	F56F3.2a	XLOC_010726	ndg-4	chrIII:4462938-4467344	no	yes
WBGene00013755	0.656446	-0.656446	0.15888	0.999353	-0.715601	0.715601	0.06265	0.846661	fbxa-115	190970	V	Y113G7B.3	XLOC_032902	fbxa-115	chrV:20190552-20192087	no	no
WBGene00019612	-0.916338	0.916338	0.0489448	0.999353	0.744188	-0.744188	0.2029	0.999956	gpcp-1	180600	X	K10B3.6a	XLOC_036180	gpcp-1	chrX:3106623-3110605	no	no
WBGene00019957	-0.327359	0.327359	0.103085	0.999353	0.385821	-0.385821	0.09555	0.902254	R08E3.1	180758	X	R08E3.1a	XLOC_033692	R08E3.1	chrX:4824972-4834755	no	no
WBGene00022500	-0.401094	0.401094	0.127295	0.999353	0.401474	-0.401474	0.07825	0.866842	lfi-1	180771	X	ZC8.4a	XLOC_033711	lfi-1	chrX:4972884-4997548	no	no
WBGene00009023	-0.741294	0.741294	0.140359	0.999353	0.675501	-0.675501	0.0712	0.8566	F21G4.1	181203	X	F21G4.1	XLOC_037315	F21G4.1	chrX:9889662-9892264	no	no
WBGene00022781	-0.349788	0.349788	0.086174	0.999353	0.314037	-0.314037	0.1158	0.93777	pmt-1	173901	II	ZK622.3a	XLOC_006923	pmt-1	chrII:5278411-5282492	no	no
WBGene00007413	0.343922	-0.343922	0.114528	0.999353	-0.345406	0.345406	0.0863	0.880211	pro-2	174598	II	C07E3.2	XLOC_007838	pro-2	chrII:10339785-10345051	no	no
WBGene00001649	-0.336339	0.336339	0.0599283	0.999353	0.312518	-0.312518	0.16805	0.995087	gob-1	181637	X	H13N06.3a	XLOC_035497	gob-1	chrX:15493467-15496875	no	no
WBGene00018631	0.881912	-0.881912	0.189909	0.999353	-1.04489	1.04489	0.05315	0.81886	F49D11.7	186036	I	F49D11.7	XLOC_003301	F49D11.7	chrI:10923573-10923892	no	yes
WBGene00002035	0.304418	-0.304418	0.0841722	0.999353	-0.314012	0.314012	0.12025	0.939515	hum-1	172698	I	F29D10.4	XLOC_002953	hum-1	chrI:8846014-8851088	no	no
WBGene00010904	-0.41521	0.41521	0.161497	0.999353	0.418175	-0.418175	0.06285	0.846661	ugt-62	175591	III	M88.1	XLOC_010734	ugt-62	chrIII:4537341-4540589	no	no
WBGene00013220	-0.240201	0.240201	0.275701	0.999353	0.618129	-0.618129	0.03695	0.735795	ctl-3	175086	II	Y54G11A.13a	XLOC_008375	ctl-3	chrII:14307777-14310667	no	yes
WBGene00012431	0.0664018	-0.0664018	0.761912	0.999353	-0.70461	0.70461	0.0134	0.535497	Y11D7A.7	189432	IV	Y11D7A.7	XLOC_014262	Y11D7A.7	chrIV:9249512-9250176	no	no
WBGene00010681	-0.316608	0.316608	0.135057	0.999353	0.394652	-0.394652	0.0757	0.858887	mak-1	174398	II	K08F8.1a	XLOC_005244	mak-1	chrII:8744076-8747018	no	yes
WBGene00003517	-0.458511	0.458511	0.09717	0.999353	0.40676	-0.40676	0.1054	0.919557	nac-1	181585	X	F31F6.6	XLOC_035395	nac-1	chrX:14895086-14898208	no	no
WBGene00009796	-0.519378	0.519378	0.0874263	0.999353	0.429828	-0.429828	0.1183	0.939515	F46G10.1	185875	X	F46G10.1a	XLOC_037827	F46G10.1	chrX:13310230-13311657	no	yes
WBGene00009232	-0.421881	0.421881	0.267873	0.999353	0.708013	-0.708013	0.03875	0.74845	nkat-1	185086	X	F28H6.3	XLOC_037945	nkat-1	chrX:14138030-14140001	no	yes
WBGene00006636	-1.07639	1.07639	0.116421	0.999353	0.80401	-0.80401	0.0891	0.890164	tsp-10	192063	II	T14B4.4a	XLOC_004877	tsp-10	chrII:6718548-6720141	no	yes
WBGene00000023	0.543064	-0.543064	0.123407	0.999353	-0.537487	0.537487	0.0836	0.878693	abt-5	173081	I	Y53C10A.9	XLOC_001518	abt-5	chrI:12011266-12018630	no	yes
WBGene00015811	0.330161	-0.330161	0.13766	0.999353	-0.363851	0.363851	0.07535	0.858849	C16A3.6	175903	III	C16A3.6	XLOC_009255	C16A3.6	chrIII:6379408-6380481	no	yes
WBGene00015641	0.355555	-0.355555	0.0761157	0.999353	-0.334427	0.334427	0.1366	0.956652	C09E7.7	175930	III	C09E7.7a	XLOC_011031	C09E7.7	chrIII:6546856-6551176	no	yes
WBGene00017355	0.391553	-0.391553	0.0787437	0.999353	-0.339456	0.339456	0.1321	0.950369	F10E9.3	176170	III	F10E9.3	XLOC_009548	F10E9.3	chrIII:8310935-8312313	no	yes
WBGene00016664	-0.456983	0.456983	0.175387	0.999353	0.609298	-0.609298	0.0589	0.840117	C45E5.1	183469	IV	C45E5.1	XLOC_013168	C45E5.1	chrIV:5744398-5746809	no	no
WBGene00017127	-0.706259	0.706259	0.177426	0.999353	0.759658	-0.759658	0.0583	0.840117	E04F6.8	174184	II	E04F6.8	XLOC_007306	E04F6.8	chrII:7210756-7211338	no	no
WBGene00017997	0.356964	-0.356964	0.140276	0.999353	-0.384614	0.384614	0.0746	0.858392	mrpl-1	177549	IV	F33D4.5	XLOC_021125	mrpl-1	chrIV:7707672-7709072	no	yes
WBGene00019460	0.374778	-0.374778	0.197919	0.999353	-0.438949	0.438949	0.0528	0.818396	idi-1	176142	III	K06H7.9	XLOC_009498	idi-1	chrIII:8091645-8092855	no	yes
WBGene00019872	-0.460216	0.460216	0.314548	0.999353	0.900904	-0.900904	0.0333	0.709092	R04E5.9	181128	X	R04E5.9	XLOC_037178	R04E5.9	chrX:8806865-8810879	no	no
WBGene00008258	-0.369915	0.369915	0.12241	0.999353	0.431897	-0.431897	0.0864	0.880211	mans-2	179642	V	C52E4.5	XLOC_031585	mans-2	chrV:11983123-11986096	no	yes
WBGene00011239	0.320613	-0.320613	0.138518	0.999353	-0.362306	0.362306	0.07655	0.861319	pges-2	177925	IV	R11A8.5	XLOC_021599	pges-2	chrIV:10366490-10367769	no	yes
WBGene00008819	0.659791	-0.659791	0.0895111	0.999353	-0.481172	0.481172	0.11845	0.939515	shw-1	174331	II	F14F11.1a	XLOC_007486	shw-1	chrII:8305832-8321421	no	yes
WBGene00019883	0.306125	-0.306125	0.11195	0.999353	-0.331558	0.331558	0.09465	0.901422	met-2	176183	III	R05D3.11	XLOC_009558	met-2	chrIII:8375227-8380560	no	yes
WBGene00000599	-0.977303	0.977303	0.0105464	0.529809	0.360872	-0.360872	1	1	col-10	179298	V	B0222.8	XLOC_030950	col-10	chrV:9164332-9165267	no	no
WBGene00011821	-0.756316	0.756316	0.19564	0.999353	0.969093	-0.969093	0.05415	0.822652	cdf-2	188574	X	T18D3.3a	XLOC_037704	cdf-2	chrX:12464700-12466709	no	no
WBGene00018275	-0.825954	0.825954	0.0953274	0.999353	0.654872	-0.654872	0.11175	0.931285	F41C3.11	173816	II	F41C3.11	XLOC_006821	F41C3.11	chrII:4731306-4733921	no	no
WBGene00020029	-0.525249	0.525249	0.0986786	0.999353	0.482621	-0.482621	0.1079	0.928719	R12C12.9	174009	II	R12C12.9a	XLOC_007067	R12C12.9	chrII:6023523-6024948	no	no
WBGene00010077	0.327244	-0.327244	0.102548	0.999353	-0.360498	0.360498	0.1045	0.919557	F55A11.4	186276	V	F55A11.4a	XLOC_028004	F55A11.4	chrV:11770513-11773477	no	yes
WBGene00001754	-0.535554	0.535554	0.231651	0.999353	0.642789	-0.642789	0.0464	0.7806	gst-6	173841	II	F11G11.3	XLOC_004498	gst-6	chrII:4879910-4880980	no	yes
WBGene00015501	0.285766	-0.285766	0.103358	0.999353	-0.328786	0.328786	0.1041	0.919557	C06A5.3	172274	I	C06A5.3a	XLOC_000646	C06A5.3	chrI:5986501-5990344	no	yes
WBGene00004322	0.322649	-0.322649	0.10544	0.999353	-0.354432	0.354432	0.10235	0.91622	rcq-5	175522	III	E03A3.2	XLOC_010661	rcq-5	chrIII:4052909-4057951	no	yes
WBGene00001085	0.301102	-0.301102	0.084563	0.999353	-0.301277	0.301277	0.12845	0.944937	dpy-26	178196	IV	C25G4.5	XLOC_021984	dpy-26	chrIV:12446178-12451267	no	yes
WBGene00011790	0.876897	-0.876897	0.167154	0.999353	-0.846808	0.846808	0.06505	0.846661	T15H9.5	188541	II	T15H9.5	XLOC_007708	T15H9.5	chrII:9610661-9611282	no	yes
WBGene00018892	0.340958	-0.340958	0.116182	0.999353	-0.364709	0.364709	0.09375	0.901422	cir-1	172225	I	F55F8.4	XLOC_002473	cir-1	chrI:5653918-5655823	no	yes
WBGene00008590	0.528386	-0.528386	0.0657286	0.999353	-0.412723	0.412723	0.1667	0.995087	F08H9.2	179950	V	F08H9.2	XLOC_028518	F08H9.2	chrV:14460649-14461042	no	yes
WBGene00017445	0.361769	-0.361769	0.294771	0.999353	-1.30497	1.30497	0.0373	0.737233	sid-5	184450	X	F14B8.2	XLOC_034093	sid-5	chrX:6904734-6904983	no	yes
WBGene00021089	1.19999	-1.19999	0.0251959	0.813458	-1.22358	1.22358	0.43665	0.999956	W08E12.8	189295	IV	W08E12.8a	XLOC_012349	W08E12.8	chrIV:1956724-4526957	no	yes
WBGene00012173	0.715522	-0.715522	0.117099	0.999353	-0.606186	0.606186	0.09385	0.901422	W01B6.6	189083	IV	W01B6.6	XLOC_014417	W01B6.6	chrIV:10081204-10082589	no	yes
WBGene00016902	0.3643	-0.3643	0.0661176	0.999353	-0.348219	0.348219	0.16635	0.994787	C53D5.1	171618	I	C53D5.1a	XLOC_000029	C53D5.1	chrI:291248-305081	no	yes
WBGene00019742	-0.694197	0.694197	0.335136	0.999353	1.28495	-1.28495	0.0329	0.708759	nhr-202	187409	V	M02H5.4a	XLOC_026125	nhr-202	chrV:462600-464857	no	no
WBGene00018743	-0.567538	0.567538	0.182907	0.999353	0.686756	-0.686756	0.06025	0.844871	F53B3.5	180578	X	F53B3.5	XLOC_036137	F53B3.5	chrX:2873368-2879611	no	no
WBGene00001113	0.50164	-0.50164	0.332585	0.999353	-0.890189	0.890189	0.03305	0.708759	dur-1	177846	IV	F25H8.5a	XLOC_021508	dur-1	chrIV:9922029-9928201	no	no
WBGene00016210	-0.33892	0.33892	0.145999	0.999353	0.453899	-0.453899	0.0755	0.858849	C29F5.1	174041	II	C29F5.1	XLOC_004786	C29F5.1	chrII:6303523-6306178	no	no
WBGene00008127	-0.772492	0.772492	0.138029	0.999353	0.738573	-0.738573	0.0802	0.870451	ddo-1	183530	V	C47A10.5a	XLOC_032626	ddo-1	chrV:17774268-17777188	no	no
WBGene00019026	0.506084	-0.506084	0.0659446	0.999353	-0.483633	0.483633	0.1678	0.995087	F58A6.9	173885	II	F58A6.9	XLOC_006903	F58A6.9	chrII:5158630-5158864	no	no
WBGene00018081	-0.808557	0.808557	0.0303501	0.876725	1.19399	-1.19399	0.36565	0.999956	F36A4.2	185339	IV	F36A4.2	XLOC_012499	F36A4.2	chrIV:1956724-4526957	no	yes
WBGene00011067	0.321929	-0.321929	0.0856305	0.999353	-0.312659	0.312659	0.13025	0.946816	vps-11	174661	II	R06F6.2	XLOC_007896	vps-11	chrII:10788345-10793433	no	yes
WBGene00007599	-0.612545	0.612545	0.0782648	0.999353	0.420263	-0.420263	0.14255	0.959842	C15A11.7	172496	I	C15A11.7a	XLOC_000879	C15A11.7	chrI:7405036-7408124	no	no
WBGene00004122	-0.86828	0.86828	0.155817	0.999353	0.82392	-0.82392	0.07195	0.8566	pqn-35	173800	II	F35D11.2a	XLOC_004452	pqn-35	chrII:4623819-4625889	no	no
WBGene00004095	0.296586	-0.296586	0.100105	0.999353	-0.38522	0.38522	0.11235	0.931285	pqe-1	175731	III	F52C9.8a	XLOC_009103	pqe-1	chrIII:5311220-5321332	no	yes
WBGene00020425	0.317165	-0.317165	0.108558	0.999353	-0.336705	0.336705	0.1044	0.919557	syx-18	179055	V	T10H9.3	XLOC_030462	syx-18	chrV:6653734-6655431	no	yes
WBGene00008610	1.9673	-1.9673	0.0113616	0.551013	0	0	1	1	F09C3.2	184226	I	F09C3.2	XLOC_003687	F09C3.2	chrI:13143189-14566044	no	no
WBGene00020527	0.756979	-0.756979	0.160224	0.999353	-0.890029	0.890029	0.07115	0.8566	T15B7.15	179074	V	T15B7.15	XLOC_030509	T15B7.15	chrV:6836707-6838527	no	no
WBGene00000554	-0.419179	0.419179	0.149302	0.999353	0.506428	-0.506428	0.0766	0.861319	cnb-1	179572	V	F55C10.1a	XLOC_027894	cnb-1	chrV:11375889-11377871	no	no
WBGene00050956	0.377218	-0.377218	0.35307	0.999353	-0.727229	0.727229	0.0324	0.708759	C14A6.13	6418693	V	C14A6.13	XLOC_032661	C14A6.13	chrV:18159656-18161280	no	no
WBGene00008504	0.307952	-0.307952	0.136939	0.999353	-0.429865	0.429865	0.0838	0.878693	F01G4.5	178019	IV	F01G4.5	XLOC_021732	F01G4.5	chrIV:11146171-11147221	no	yes
WBGene00002850	0.337858	-0.337858	0.142333	0.999353	-0.352515	0.352515	0.0807	0.870451	let-716	175906	III	C16A3.3	XLOC_009258	let-716	chrIII:6383498-6389133	no	yes
WBGene00021454	-1.02042	1.02042	0.156445	0.999353	0.985283	-0.985283	0.0736	0.856643	Y39F10A.3	189759	II	Y39F10A.3	XLOC_006241	Y39F10A.3	chrII:781890-783008	no	yes
WBGene00001832	0.292646	-0.292646	0.0968015	0.999353	-0.30689	0.30689	0.1193	0.939515	hcp-4	171964	I	T03F1.9	XLOC_002214	hcp-4	chrI:3862937-3865940	no	yes
WBGene00022735	-0.593671	0.593671	0.387605	0.999353	1.0555	-1.0555	0.0298	0.68398	ZK418.6	191317	III	ZK418.6	XLOC_011098	ZK418.6	chrIII:7076552-7078774	no	yes
WBGene00011736	-0.429022	0.429022	0.0230357	0.769264	0.497453	-0.497453	0.5008	0.999956	T12D8.9	176795	III	T12D8.9a	XLOC_010199	T12D8.9	chrIII:13614759-13622122	no	yes
WBGene00015464	-0.424274	0.424274	0.0803923	0.999353	0.360718	-0.360718	0.14395	0.963483	C05C8.7	179120	V	C05C8.7	XLOC_030599	C05C8.7	chrV:7243407-7246999	no	no
WBGene00014036	0.321889	-0.321889	0.138654	0.999353	-0.363528	0.363528	0.0836	0.878693	ZK643.5	176263	III	ZK643.5	XLOC_011415	ZK643.5	chrIII:8952881-8956107	no	yes
WBGene00021036	-0.566942	0.566942	0.0215798	0.749801	0.477939	-0.477939	0.53905	0.999956	W05F2.4	3896724	I	W05F2.4a	XLOC_002163	W05F2.4	chrI:3233392-3600680	no	yes
WBGene00200308	-0.27056	0.27056	0.58024	0.999353	2.08868	-2.08868	0.0201	0.611167	C56C10.15	NA	II		XLOC_007193	C56C10.15	chrII:6588746-6589097	no	yes
WBGene00016788	-0.997365	0.997365	0.178183	0.999353	0.939696	-0.939696	0.0654	0.848741	C49G7.10	183624	V	C49G7.10a	XLOC_030028	C49G7.10	chrV:4040437-4041976	no	no
WBGene00000780	-0.543102	0.543102	0.080786	0.999353	0.368584	-0.368584	0.1449	0.963997	cpn-4	172996	I	F49D11.8	XLOC_003302	cpn-4	chrI:10924332-10925739	no	yes
WBGene00012150	0.384578	-0.384578	0.157623	0.999353	-0.434326	0.434326	0.0742	0.858007	syx-17	172663	I	VF39H2L.1	XLOC_001033	syx-17	chrI:8644492-8646112	no	no
WBGene00003733	-0.398764	0.398764	0.129782	0.999353	0.466603	-0.466603	0.0904	0.892323	nhx-5	181258	X	F57C7.2a	XLOC_034715	nhx-5	chrX:10577066-10580674	no	no
WBGene00017449	-0.753776	0.753776	0.264566	0.999353	0.986439	-0.986439	0.0445	0.777687	otpl-3	259710	X	F14B8.7	XLOC_036838	otpl-3	chrX:6921679-6924411	no	no
WBGene00009344	0.401848	-0.401848	0.113119	0.999353	-0.416174	0.416174	0.1044	0.919557	F32H2.7	172716	I	F32H2.7	XLOC_002974	F32H2.7	chrI:8994043-8998526	no	yes
WBGene00044644	-1.44135	1.44135	0.0771057	0.999353	0.889976	-0.889976	0.15305	0.974587	B0205.13	4362999	I	B0205.13	XLOC_003271	B0205.13	chrI:10727810-10728711	no	yes
WBGene00020886	0.495045	-0.495045	0.239169	0.999353	-0.66239	0.66239	0.0495	0.802764	ttr-6	189028	X	T28B4.3	XLOC_036777	ttr-6	chrX:6596532-6597080	no	yes
WBGene00003680	-0.713678	0.713678	0.165402	0.999353	0.721412	-0.721412	0.07165	0.8566	nhr-90	178577	V	ZK488.2	XLOC_026157	nhr-90	chrV:610551-612484	no	no
WBGene00001393	-0.302967	0.302967	0.0716319	0.999353	0.274999	-0.274999	0.1657	0.993436	fat-1	178291	IV	Y67H2A.8	XLOC_014994	fat-1	chrIV:13315621-13318582	no	yes
WBGene00009370	0.353083	-0.353083	0.177839	0.999353	-0.507735	0.507735	0.0669	0.855466	set-10	185237	I	F33H2.7	XLOC_003754	set-10	chrI:15027760-15030539	no	yes
WBGene00004751	-0.249657	0.249657	0.421298	0.999353	1.91543	-1.91543	0.0283	0.676254	sea-2	173738	II	K10G6.3a	XLOC_004369	sea-2	chrII:2443296-4279128	no	yes
WBGene00004308	0.349645	-0.349645	0.0929641	0.999353	-0.395105	0.395105	0.1287	0.944937	rap-2	180011	V	C25D7.7	XLOC_032158	rap-2	chrV:15061880-15064055	no	yes
WBGene00011422	-0.829246	0.829246	0.138841	0.999353	0.814924	-0.814924	0.0862	0.880211	T04B2.3	177868	IV	T04B2.3a	XLOC_014413	T04B2.3	chrIV:10047386-10050488	no	yes
WBGene00021996	0.399595	-0.399595	0.239993	0.999353	-0.474912	0.474912	0.0498	0.803986	Y59E9AL.6	177298	IV	Y59E9AL.6	XLOC_019944	Y59E9AL.6	chrIV:5224950-5225700	no	no
WBGene00045306	0.832012	-0.832012	0.118495	0.999353	-0.673565	0.673565	0.10145	0.91622	ZC250.5	6418817	V	ZC250.5	XLOC_026864	ZC250.5	chrV:5805792-5807490	no	yes
WBGene00019467	0.358303	-0.358303	0.213021	0.999353	-0.474797	0.474797	0.05695	0.837407	K07B1.7	179318	V	K07B1.7a	XLOC_030984	K07B1.7	chrV:9345106-9346913	no	yes
WBGene00018981	-0.949911	0.949911	0.140319	0.999353	0.948317	-0.948317	0.0863	0.880211	F56F4.4	186399	I	F56F4.4	XLOC_000669	F56F4.4	chrI:6137995-6138957	no	yes
WBGene00004390	0.299819	-0.299819	0.154455	0.999353	-0.384617	0.384617	0.0782	0.866842	rnp-7	176002	III	K04G7.10	XLOC_011115	rnp-7	chrIII:7159090-7161088	no	yes
WBGene00017274	0.322742	-0.322742	0.129137	0.999353	-0.35474	0.35474	0.09395	0.901422	F08F8.9	176045	III	F08F8.9a	XLOC_011153	F08F8.9	chrIII:7349343-7353888	no	yes
WBGene00018112	-0.800717	0.800717	0.0139999	0.619103	0.250869	-0.250869	0.8611	0.999956	F36H9.4	353436	V	F36H9.4a	XLOC_029661	F36H9.4	chrV:1743375-2713617	no	no
WBGene00011451	0.387549	-0.387549	0.112814	0.999353	-0.362968	0.362968	0.1072	0.924985	T04H1.5	179679	V	T04H1.5	XLOC_028106	T04H1.5	chrV:12251327-12252330	no	no
WBGene00010274	-0.620089	0.620089	0.123994	0.999353	0.507559	-0.507559	0.09735	0.910908	F58G6.3	259943	IV	F58G6.3	XLOC_014331	F58G6.3	chrIV:9653528-9654154	no	no
WBGene00018386	0.383775	-0.383775	0.141101	0.999353	-0.452297	0.452297	0.0859	0.880211	F43C11.9	173592	II	F43C11.9	XLOC_006486	F43C11.9	chrII:2337966-2340742	no	no
WBGene00015937	0.42118	-0.42118	0.179109	0.999353	-0.482332	0.482332	0.06785	0.855466	C17H12.12	177444	IV	C17H12.12	XLOC_013790	C17H12.12	chrIV:6795915-6798681	no	yes
WBGene00017919	-0.301706	0.301706	0.114012	0.999353	0.372621	-0.372621	0.10695	0.924804	F29B9.1	177233	IV	F29B9.1	XLOC_012565	F29B9.1	chrIV:4665415-4667231	no	yes
WBGene00018895	0.587915	-0.587915	0.120246	0.999353	-0.510831	0.510831	0.1015	0.91622	F55F8.7	172228	I	F55F8.7	XLOC_002476	F55F8.7	chrI:5659499-5661215	no	yes
WBGene00011311	0.335893	-0.335893	0.139841	0.999353	-0.35325	0.35325	0.0875	0.885512	T01B7.5	174395	II	T01B7.5a	XLOC_005240	T01B7.5	chrII:8716794-8720026	no	yes
WBGene00020806	-0.486822	0.486822	0.19152	0.999353	0.574022	-0.574022	0.06385	0.846661	T25F10.3	179067	V	T25F10.3	XLOC_027032	T25F10.3	chrV:6745117-6748222	no	no
WBGene00018985	-0.779179	0.779179	0.145789	0.999353	0.681248	-0.681248	0.0842	0.878693	F56F10.2	186404	X	F56F10.2	XLOC_033071	F56F10.2	chrX:859946-862430	no	no
WBGene00220078	-1.09474	1.09474	0.169006	0.999353	1.0632	-1.0632	0.07265	0.8566	T21F2.3	NA	X		XLOC_038325	T21F2.3	chrX:16721870-16722040	no	no
WBGene00017536	-0.420103	0.420103	0.0309297	0.876725	0.445026	-0.445026	0.40085	0.999956	F17A9.4	178999	V	F17A9.4	XLOC_030363	F17A9.4	chrV:6107810-6114632	no	no
WBGene00004371	0.295897	-0.295897	0.128703	0.999353	-0.335771	0.335771	0.09645	0.908554	rig-4	177597	IV	Y42H9B.2	XLOC_021177	rig-4	chrIV:7991842-8004032	no	yes
WBGene00018674	0.340187	-0.340187	0.0995814	0.999353	-0.349819	0.349819	0.12485	0.944937	F52C9.3	175732	III	F52C9.3	XLOC_009104	F52C9.3	chrIII:5321852-5326193	no	no
WBGene00001505	-0.49657	0.49657	0.207857	0.999353	0.613426	-0.613426	0.06025	0.844871	fut-1	174400	II	K08F8.3	XLOC_007554	fut-1	chrII:8756522-8758562	no	no
WBGene00010658	-1.31799	1.31799	0.0401819	0.966637	1.33969	-1.33969	0.31265	0.999956	K08D8.4	187144	IV	K08D8.4a	XLOC_022035	K08D8.4	chrIV:12849497-13146871	no	no
WBGene00018811	-0.296308	0.296308	0.0815844	0.999353	0.282568	-0.282568	0.1553	0.976268	pmt-2	178854	V	F54D11.1	XLOC_026675	pmt-2	chrV:4628753-4635177	no	yes
WBGene00019824	0.336839	-0.336839	0.160502	0.999353	-0.365216	0.365216	0.0791	0.870451	R02D3.7	176844	IV	R02D3.7	XLOC_019116	R02D3.7	chrIV:253694-255426	no	yes
WBGene00011297	-0.787344	0.787344	0.143781	0.999353	0.667243	-0.667243	0.08785	0.886495	R102.10	3564803	IV	R102.10	XLOC_014527	R102.10	chrIV:10705509-10707234	no	yes
WBGene00012475	-0.877085	0.877085	0.012717	0.587714	1.03928	-1.03928	1	1	Y18D10A.2	189471	I	Y18D10A.2	XLOC_003539	Y18D10A.2	chrI:12807577-12809286	no	yes
WBGene00015056	-0.584272	0.584272	0.0782579	0.999353	0.433102	-0.433102	0.16125	0.985217	B0222.5	181860	V	B0222.5	XLOC_030945	B0222.5	chrV:9152707-9154847	no	no
WBGene00019554	0.425266	-0.425266	0.11918	0.999353	-0.437454	0.437454	0.1066	0.923893	K09C4.10	180620	X	K09C4.10	XLOC_036212	K09C4.10	chrX:3276194-3280187	no	no
WBGene00022621	0.396764	-0.396764	0.0909675	0.999353	-0.393948	0.393948	0.1398	0.95711	ZC477.7	191182	IV	ZC477.7a	XLOC_020998	ZC477.7	chrIV:7110482-7111322	no	no
WBGene00006061	0.276092	-0.276092	0.121396	0.999353	-0.334585	0.334585	0.10455	0.919557	stl-1	172777	I	F30A10.5a	XLOC_003057	stl-1	chrI:9486807-9488018	no	no
WBGene00001394	-0.309233	0.309233	0.111517	0.999353	0.313582	-0.313582	0.1145	0.934924	fat-2	178293	IV	W02A2.1a	XLOC_014995	fat-2	chrIV:13323855-13326254	no	yes
WBGene00001941	0.368676	-0.368676	0.107277	0.999353	-0.319386	0.319386	0.1191	0.939515	his-67	188792	I	T23D8.5	XLOC_003171	his-67	chrI:9988441-9988753	no	yes
WBGene00015813	0.289118	-0.289118	0.107287	0.999353	-0.303513	0.303513	0.1191	0.939515	thoc-2	175900	III	C16A3.8	XLOC_009252	thoc-2	chrIII:6367992-6373719	no	yes
WBGene00001082	-0.349327	0.349327	0.134087	0.999353	0.377814	-0.377814	0.09525	0.901565	dpy-23	180713	X	R160.1a	XLOC_033606	dpy-23	chrX:4389350-4393141	no	no
WBGene00012013	-0.732822	0.732822	0.197807	0.999353	0.79163	-0.79163	0.06475	0.846661	ugt-54	188885	IV	T25B9.7	XLOC_014535	ugt-54	chrIV:10761702-10764327	no	yes
WBGene00019381	0.296427	-0.296427	0.158286	0.999353	-0.577297	0.577297	0.08085	0.870451	K04C2.3	175958	III	K04C2.3a	XLOC_009324	K04C2.3	chrIII:6873062-6873392	no	yes
WBGene00018168	0.811481	-0.811481	0.206993	0.999353	-0.882233	0.882233	0.06195	0.846661	irld-7	185447	IV	F38A5.11	XLOC_013741	irld-7	chrIV:6592677-6594465	no	yes
WBGene00016417	-0.967534	0.967534	0.192749	0.999353	1.7829	-1.7829	0.0667	0.855466	C34F11.8	173892	II	C34F11.8	XLOC_006912	C34F11.8	chrII:5209849-5210770	no	no
WBGene00013858	0.311008	-0.311008	0.138536	0.999353	-0.402066	0.402066	0.0931	0.899429	ssp-34	177966	IV	ZC168.6	XLOC_021657	ssp-34	chrIV:10738258-10738582	no	yes
WBGene00003619	0.394669	-0.394669	0.0879958	0.999353	-0.3594	0.3594	0.1468	0.965779	nhr-20	175546	III	F43C1.4	XLOC_010690	nhr-20	chrIII:4230595-4233175	no	yes
WBGene00201900	0.502938	-0.502938	0.292736	0.999353	-1.0015	1.0015	0.0441	0.775919	T21C9.17	NA	V		XLOC_031227	T21C9.17	chrV:10602195-10602409	no	no
WBGene00013659	-0.686729	0.686729	0.0159369	0.660908	0.503797	-0.503797	0.8117	0.999956	Y105C5B.20	190897	IV	Y105C5B.20	XLOC_024800	Y105C5B.20	chrIV:15896213-16675918	no	no
WBGene00021487	-0.610267	0.610267	0.0201867	0.749184	0.656641	-0.656641	0.64175	0.999956	comt-3	189785	V	Y40B10A.2a	XLOC_026336	comt-3	chrV:1743375-2713617	no	yes
WBGene00017264	0.750634	-0.750634	0.1193	0.999353	-0.600213	0.600213	0.1089	0.931285	F08F3.8	184197	V	F08F3.8	XLOC_030234	F08F3.8	chrV:5431299-5432541	no	yes
WBGene00012825	-0.694352	0.694352	0.188122	0.999353	0.743917	-0.743917	0.06925	0.856312	Y43F8C.3	180282	V	Y43F8C.3	XLOC_032844	Y43F8C.3	chrV:19615038-19622316	no	yes
WBGene00016753	0.475332	-0.475332	0.142789	0.999353	-0.48549	0.48549	0.0911	0.892323	oac-9	172323	I	C48E7.8	XLOC_002580	oac-9	chrI:6265743-6269035	no	yes
WBGene00010510	0.346569	-0.346569	0.137641	0.999353	-0.426219	0.426219	0.0946	0.901422	ent-3	179926	V	K02E11.1	XLOC_031999	ent-3	chrV:14232305-14235987	no	no
WBGene00010933	0.458862	-0.458862	0.138615	0.999353	-0.488895	0.488895	0.09445	0.901422	M162.7	187490	V	M162.7	XLOC_032865	M162.7	chrV:19792653-19794952	no	yes
WBGene00219306	-0.343505	0.343505	0.221948	0.999353	0.550539	-0.550539	0.05895	0.840117	linc-4	NA	II		XLOC_004780	linc-4	chrII:6268940-6270157	no	yes
WBGene00010619	-0.595561	0.595561	0.0780686	0.999353	0.513055	-0.513055	0.1677	0.995087	K07A1.15	3565158	I	K07A1.15	XLOC_003099	K07A1.15	chrI:9609032-9609493	no	yes
WBGene00001879	0.646753	-0.646753	0.0183102	0.712244	-0.613017	0.613017	0.71675	0.999956	his-5	179233	V	F45F2.3	XLOC_027333	his-5	chrV:7731614-8569933	no	yes
WBGene00002038	-0.422953	0.422953	0.226149	0.999353	0.468874	-0.468874	0.05845	0.840117	hum-5	175521	III	T02C12.1	XLOC_010660	hum-5	chrIII:4029342-4036809	no	no
WBGene00012689	0.460461	-0.460461	0.168912	0.999353	-0.517082	0.517082	0.0784	0.866842	Y39B6A.30	180248	V	Y39B6A.30	XLOC_029244	Y39B6A.30	chrV:19014607-19019972	no	yes
WBGene00000409	0.345048	-0.345048	0.127481	0.999353	-0.35443	0.35443	0.1045	0.919557	cdk-8	172677	I	F39H11.3	XLOC_001041	cdk-8	chrI:8702609-8705672	no	yes
WBGene00015022	0.441115	-0.441115	0.251227	0.999353	-0.577008	0.577008	0.05305	0.818396	B0205.8	172976	I	B0205.8	XLOC_003272	B0205.8	chrI:10729013-10730207	no	yes
WBGene00002020	-0.568169	0.568169	0.0134378	0.609263	0	0	1	1	hsp-16.49	179288	V	T27E4.9	XLOC_027449	hsp-16.49	chrV:9088108-9088595	no	yes
WBGene00009121	0.360897	-0.360897	0.105738	0.999353	-0.376398	0.376398	0.1268	0.944937	F25H2.7	184937	I	F25H2.7	XLOC_001328	F25H2.7	chrI:10558355-10559778	no	yes
WBGene00013687	0.292247	-0.292247	0.181872	0.999353	-0.428433	0.428433	0.07385	0.857307	exoc-8	173320	I	Y105E8B.2a	XLOC_003722	exoc-8	chrI:14634614-14642550	no	yes
WBGene00019455	0.452379	-0.452379	0.401552	0.999353	-1.94886	1.94886	0.03335	0.709092	K06H7.1	187076	III	K06H7.1	XLOC_009500	K06H7.1	chrIII:8099260-8100572	no	yes
WBGene00007537	-1.49837	1.49837	0.105998	0.999353	3.1548	-3.1548	0.1272	0.944937	fipr-8	182541	V	C12D8.6	XLOC_031140	fipr-8	chrV:10239620-10239889	no	yes
WBGene00013516	0.8893	-0.8893	0.278002	0.999353	-1.14438	1.14438	0.04865	0.796703	Y73F4A.3	177721	IV	Y73F4A.3	XLOC_021336	Y73F4A.3	chrIV:9039629-9040445	no	no
WBGene00011189	0.449773	-0.449773	0.136143	0.999353	-0.456812	0.456812	0.0997	0.914482	R10D12.8	259659	V	R10D12.8	XLOC_031956	R10D12.8	chrV:13950757-13953179	no	yes
WBGene00003511	-0.509747	0.509747	0.0803649	0.999353	0.401795	-0.401795	0.16905	0.995294	mxl-3	181457	X	F46G10.6	XLOC_037828	mxl-3	chrX:13349855-13350721	no	yes
WBGene00017642	0.320652	-0.320652	0.138013	0.999353	-0.345425	0.345425	0.0986	0.914482	F20D12.2	177589	IV	F20D12.2	XLOC_014047	F20D12.2	chrIV:7948664-7953413	no	yes
WBGene00002017	-0.559452	0.559452	0.0136465	0.610334	0	0	1	1	hsp-16.11	179289	V	T27E4.2	XLOC_027450	hsp-16.11	chrV:9090092-9090582	no	yes
WBGene00010786	-0.94308	0.94308	0.0671258	0.999353	0.566251	-0.566251	0.2034	0.999956	K12D12.4	187334	II	K12D12.4	XLOC_008083	K12D12.4	chrII:11863461-11865394	no	yes
WBGene00010638	0.340697	-0.340697	0.169069	0.999353	-0.36149	0.36149	0.0813	0.870451	K07F5.14	177837	IV	K07F5.14	XLOC_014368	K07F5.14	chrIV:9862203-9863972	no	yes
WBGene00194894	0.745557	-0.745557	0.225112	0.999353	-0.940379	0.940379	0.06105	0.845958	T05B4.14	13212503	V	T05B4.14	XLOC_030036	T05B4.14	chrV:4108710-4109906	no	no
WBGene00044080	-0.693195	0.693195	0.265469	0.999353	0.980579	-0.980579	0.0517	0.811468	D1086.10	179905	V	D1086.10a	XLOC_028445	D1086.10	chrV:14082793-14083471	no	no
WBGene00004981	-0.279785	0.279785	0.0820351	0.999353	0.280068	-0.280068	0.16855	0.995294	spl-1	176857	IV	Y66H1B.4	XLOC_019133	spl-1	chrIV:380017-383179	no	yes
WBGene00012018	-0.392423	0.392423	0.17313	0.999353	0.375654	-0.375654	0.07965	0.870451	T25C12.3	259727	X	T25C12.3	XLOC_037556	T25C12.3	chrX:11491099-11499783	no	no
WBGene00018435	-0.611825	0.611825	0.161026	0.999353	0.609528	-0.609528	0.08585	0.880211	btb-9	185768	II	F45C12.4	XLOC_004010	btb-9	chrII:1728578-1729983	no	no
WBGene00000667	-0.592099	0.592099	0.0218866	0.749801	0.772901	-0.772901	0.63245	0.999956	col-92	176528	III	W05B2.6	XLOC_011727	col-92	chrIII:10732173-12052193	no	no
WBGene00000670	-0.563096	0.563096	0.0208255	0.749801	0.559595	-0.559595	0.6644	0.999956	col-95	176602	III	Y41C4A.16	XLOC_010020	col-95	chrIII:10732173-12052193	no	no
WBGene00018165	0.958095	-0.958095	0.18881	0.999353	-1.07061	1.07061	0.07395	0.857307	F38A5.8	185444	IV	F38A5.8	XLOC_013745	F38A5.8	chrIV:6599870-6600480	no	yes
WBGene00021765	0.297341	-0.297341	0.0932187	0.999353	-0.331558	0.331558	0.1498	0.969601	Y51F10.4	245996	I	Y51F10.4a	XLOC_000174	Y51F10.4	chrI:1932354-1945034	no	yes
WBGene00011489	0.273984	-0.273984	0.0966619	0.999353	-0.289808	0.289808	0.14465	0.963997	T05F1.2	172804	I	T05F1.2	XLOC_001173	T05F1.2	chrI:9622613-9624598	no	yes
WBGene00015382	-1.10219	1.10219	0.227248	0.999353	1.14184	-1.14184	0.06155	0.846661	C03B1.14	182152	X	C03B1.14	XLOC_036731	C03B1.14	chrX:6359427-6360710	no	no
WBGene00001784	-0.432516	0.432516	0.103363	0.999353	0.35492	-0.35492	0.13465	0.956652	gst-36	187645	X	R07B1.4	XLOC_037311	gst-36	chrX:9861706-9862897	no	no
WBGene00010231	0.352821	-0.352821	0.215586	0.999353	-0.40026	0.40026	0.0645	0.846661	F58B3.4	178088	IV	F58B3.4	XLOC_021822	F58B3.4	chrIV:11628798-11631815	no	no
WBGene00017402	-0.53322	0.53322	0.0176277	0.696183	0.370234	-0.370234	0.7925	0.999956	F12E12.1	173718	II	F12E12.1	XLOC_004334	F12E12.1	chrII:2443296-4279128	no	no
WBGene00006583	-0.507069	0.507069	0.159385	0.999353	0.550182	-0.550182	0.0878	0.886495	tnc-2	174612	II	ZK673.7	XLOC_005502	tnc-2	chrII:10466955-10468047	no	no
WBGene00018840	0.612848	-0.612848	0.16344	0.999353	-0.580127	0.580127	0.0859	0.880211	F54H5.3	186264	II	F54H5.3	XLOC_004857	F54H5.3	chrII:6622155-6623401	no	no
WBGene00003469	0.274297	-0.274297	0.142991	0.999353	-0.352226	0.352226	0.09835	0.914482	msp-142	173981	II	K05F1.2	XLOC_004680	msp-142	chrII:5797906-5798290	no	no
WBGene00021649	0.326443	-0.326443	0.122736	0.999353	-0.343166	0.343166	0.11505	0.93777	Y47G6A.25	171928	I	Y47G6A.25	XLOC_002184	Y47G6A.25	chrI:3606468-3608282	no	yes
WBGene00020491	-0.718587	0.718587	0.158339	0.999353	0.652027	-0.652027	0.0893	0.890642	T13G4.4	188484	X	T13G4.4	XLOC_035903	T13G4.4	chrX:1188533-1190740	no	no
WBGene00010887	-0.886001	0.886001	0.274566	0.999353	1.15836	-1.15836	0.0514	0.809715	M7.12	187458	IV	M7.12	XLOC_021719	M7.12	chrIV:11096756-11097819	no	no
WBGene00016717	-0.658225	0.658225	0.217898	0.999353	0.702899	-0.702899	0.06485	0.846661	math-22	173557	II	C46F9.1a	XLOC_004049	math-22	chrII:1905433-1907780	no	no
WBGene00007750	0.815245	-0.815245	0.0497824	0.999353	-0.885489	0.885489	0.2855	0.999956	syg-2	181561	X	C26G2.1a	XLOC_035357	syg-2	chrX:14654920-14662506	no	no
WBGene00015704	0.913192	-0.913192	0.0443922	0.998594	-0.468914	0.468914	0.3208	0.999956	tiam-1	259373	I	C11D9.1	XLOC_000448	tiam-1	chrI:4411802-4426056	no	yes
WBGene00015451	0.351336	-0.351336	0.137103	0.999353	-0.389774	0.389774	0.1041	0.919557	C04F5.9	178899	V	C04F5.9	XLOC_030189	C04F5.9	chrV:5114771-5119141	no	no
WBGene00007733	0.313202	-0.313202	0.121895	0.999353	-0.350284	0.350284	0.1177	0.93935	smz-1	178197	IV	C25G4.6	XLOC_014865	smz-1	chrIV:12455168-12456094	no	yes
WBGene00003587	0.451186	-0.451186	0.105458	0.999353	-0.393236	0.393236	0.13645	0.956652	ned-8	172910	I	F45H11.2	XLOC_003220	ned-8	chrI:10373548-10373850	no	yes
WBGene00019069	-1.20196	1.20196	0.0415343	0.973189	1.30621	-1.30621	0.34735	0.999956	lgc-30	186551	IV	F58H7.3	XLOC_012107	lgc-30	chrIV:858931-1921342	no	no
WBGene00007906	0.37803	-0.37803	0.445826	0.999353	-0.805849	0.805849	0.0324	0.708759	C33G3.6	181518	X	C33G3.6	XLOC_037939	C33G3.6	chrX:14080598-14084246	no	no
WBGene00001055	-0.485093	0.485093	0.156645	0.999353	0.503764	-0.503764	0.09265	0.897045	dpf-2	181579	X	C27C12.7	XLOC_035386	dpf-2	chrX:14831784-14838078	no	no
WBGene00014150	-0.472103	0.472103	0.158734	0.999353	0.467623	-0.467623	0.0918	0.894708	ZK909.6	3565097	I	ZK909.6	XLOC_001878	ZK909.6	chrI:14967301-14968459	no	no
WBGene00019510	0.323836	-0.323836	0.17417	0.999353	-0.348733	0.348733	0.08395	0.878693	K07H8.10	177621	IV	K07H8.10	XLOC_021225	K07H8.10	chrIV:8286857-8289505	no	yes
WBGene00010750	-0.995472	0.995472	0.0291505	0.860293	0.958471	-0.958471	0.5014	0.999956	K10D11.6	178249	IV	K10D11.6	XLOC_022046	K10D11.6	chrIV:12849497-13146871	no	no
WBGene00044789	0.281193	-0.281193	0.146889	0.999353	-0.371304	0.371304	0.09985	0.914482	T07A9.14	4363068	IV	T07A9.14	XLOC_012035	T07A9.14	chrIV:386698-387606	no	yes
WBGene00004315	0.315935	-0.315935	0.166148	0.999353	-0.341436	0.341436	0.0885	0.889202	rbd-1	178229	IV	T23F6.4a	XLOC_014895	rbd-1	chrIV:12724966-12729950	no	yes
WBGene00022491	-0.279239	0.279239	0.0949856	0.999353	0.302998	-0.302998	0.1548	0.976268	Y119D3B.14	191043	III	Y119D3B.14	XLOC_010360	Y119D3B.14	chrIII:1185332-1193782	no	yes
WBGene00011976	0.293107	-0.293107	0.155582	0.999353	-0.348335	0.348335	0.09475	0.901422	T24B8.2	174442	II	T24B8.2	XLOC_005292	T24B8.2	chrII:9054917-9056383	no	yes
WBGene00013158	-0.388032	0.388032	0.196725	0.999353	0.451926	-0.451926	0.07505	0.858849	Y53F4B.11	190213	II	Y53F4B.11a	XLOC_006096	Y53F4B.11	chrII:15010715-15013283	no	yes
WBGene00017592	-0.615407	0.615407	0.174224	0.999353	0.600886	-0.600886	0.0847	0.878693	F19C7.2	184678	IV	F19C7.2	XLOC_012553	F19C7.2	chrIV:4599946-4602715	no	no
WBGene00016277	0.288476	-0.288476	0.124928	0.999353	-0.312378	0.312378	0.1186	0.939515	C30G12.6	174196	II	C30G12.6a	XLOC_007316	C30G12.6	chrII:7292233-7295974	no	yes
WBGene00002276	0.307248	-0.307248	0.0889618	0.999353	-0.292971	0.292971	0.1667	0.995087	lem-3	172792	I	F42H11.2	XLOC_003088	lem-3	chrI:9578708-9581259	no	yes
WBGene00006695	2.08514	-2.08514	0.0148016	0.64101	-1.10741	1.10741	1	1	twk-45	190614	III	Y71H2AM.22a	XLOC_010531	twk-45	chrIII:2793403-2800860	no	yes
WBGene00011962	0.313269	-0.313269	0.0640869	0.999353	-0.293126	0.293126	0.23135	0.999956	T23G5.2	176302	III	T23G5.2a	XLOC_011467	T23G5.2	chrIII:9231658-9236236	no	yes
WBGene00012101	1.15277	-1.15277	0.151148	0.999353	-1.03994	1.03994	0.09875	0.914482	zip-10	179599	V	T27F2.4	XLOC_031502	zip-10	chrV:11650184-11650733	no	yes
WBGene00002138	-0.395125	0.395125	0.135239	0.999353	0.41129	-0.41129	0.1103	0.931285	inx-16	172005	I	R12E2.5	XLOC_000411	inx-16	chrI:4162058-4164420	no	yes
WBGene00019429	0.365209	-0.365209	0.129409	0.999353	-0.337684	0.337684	0.1152	0.93777	K06A5.1	172354	I	K06A5.1a	XLOC_000741	K06A5.1	chrI:6474210-6476673	no	yes
WBGene00017895	0.287255	-0.287255	0.110324	0.999353	-0.309484	0.309484	0.13545	0.956652	vrk-1	174004	II	F28B12.3	XLOC_004713	vrk-1	chrII:5921948-5924435	no	yes
WBGene00000671	-1.13962	1.13962	0.0413272	0.971776	1.2569	-1.2569	0.3627	0.999956	col-96	353461	III	Y41C4A.19	XLOC_011795	col-96	chrIII:10732173-12052193	no	no
WBGene00009225	0.508154	-0.508154	0.466335	0.999353	-1.24231	1.24231	0.0323	0.708759	fbxa-94	3564999	V	F28F8.8a	XLOC_028718	fbxa-94	chrV:15572995-15574087	no	yes
WBGene00011966	0.355547	-0.355547	0.20904	0.999353	-0.388966	0.388966	0.0721	0.8566	T23G7.3	174456	II	T23G7.3	XLOC_007633	T23G7.3	chrII:9166007-9167739	no	yes
WBGene00022488	-0.316176	0.316176	0.0865175	0.999353	0.29261	-0.29261	0.1742	0.999956	orc-3	175286	III	Y119D3B.11	XLOC_008581	orc-3	chrIII:1208131-1213591	no	yes
WBGene00008822	0.656578	-0.656578	0.0263521	0.831629	-0.786437	0.786437	0.5725	0.999956	F14H3.3	180075	V	F14H3.3	XLOC_032351	F14H3.3	chrV:15699960-16443388	no	no
WBGene00007846	0.341907	-0.341907	0.148336	0.999353	-0.418852	0.418852	0.10145	0.91622	C31E10.5	181508	X	C31E10.5	XLOC_037919	C31E10.5	chrX:13991964-13995736	no	no
WBGene00008512	0.701878	-0.701878	0.186248	0.999353	-0.720161	0.720161	0.08135	0.870451	F01G10.10	177907	IV	F01G10.10	XLOC_014453	F01G10.10	chrIV:10246139-10249653	no	yes
WBGene00001352	0.305752	-0.305752	0.134166	0.999353	-0.319701	0.319701	0.1131	0.931285	evl-14	175555	III	H38K22.1	XLOC_010703	evl-14	chrIII:4303279-4313097	no	yes
WBGene00014108	-0.537678	0.537678	0.112601	0.999353	0.459267	-0.459267	0.13535	0.956652	ZK856.7	179416	V	ZK856.7	XLOC_027641	ZK856.7	chrV:10202072-10202484	no	yes
WBGene00002266	-0.45295	0.45295	0.0635819	0.999353	0.41827	-0.41827	0.23975	0.999956	lec-3	174557	II	ZK892.1a	XLOC_005420	lec-3	chrII:9991100-9999925	no	yes
WBGene00044414	-0.512851	0.512851	0.214267	0.999353	0.814092	-0.814092	0.07125	0.8566	C06A5.12	3565263	I	C06A5.12	XLOC_002525	C06A5.12	chrI:6004709-6007561	no	yes
WBGene00021325	-0.373849	0.373849	0.112508	0.999353	0.340526	-0.340526	0.1368	0.956652	Y34B4A.9	180796	X	Y34B4A.9	XLOC_033762	Y34B4A.9	chrX:5255161-5256715	no	yes
WBGene00015555	0.27594	-0.27594	0.103232	0.999353	-0.294342	0.294342	0.1491	0.969469	ufl-1	177471	IV	C06G3.9	XLOC_020981	ufl-1	chrIV:7032830-7036848	no	yes
WBGene00013699	-0.970774	0.970774	0.190563	0.999353	0.950225	-0.950225	0.0809	0.870451	Y106G6D.2	172875	I	Y106G6D.2	XLOC_001261	Y106G6D.2	chrI:10110993-10111840	no	yes
WBGene00012343	0.433694	-0.433694	0.0154212	0.656977	0	0	1	1	W08E3.2	173203	I	W08E3.2	XLOC_003587	W08E3.2	chrI:13143189-14566044	no	yes
WBGene00016559	0.472674	-0.472674	0.21361	0.999353	-0.55185	0.55185	0.07215	0.8566	C41A3.2	180814	X	C41A3.2a	XLOC_036543	C41A3.2	chrX:5406685-5411691	no	no
WBGene00044202	-0.762059	0.762059	0.323306	0.999353	1.25413	-1.25413	0.04785	0.793592	K10G4.10	3565149	V	K10G4.10	XLOC_029030	K10G4.10	chrV:17273498-17274992	no	no
WBGene00009492	0.702214	-0.702214	0.1654	0.999353	-0.634002	0.634002	0.09445	0.901422	F36H1.3	185379	IV	F36H1.3	XLOC_014594	F36H1.3	chrIV:11050194-11052409	no	yes
WBGene00045089	1.1866	-1.1866	0.138786	0.999353	-1.97335	1.97335	0.11285	0.931285	C05H8.3	NA	III		XLOC_010899	C05H8.3	chrIII:5635446-5654235	no	yes
WBGene00022708	0.701137	-0.701137	0.146573	0.999353	-0.634134	0.634134	0.10695	0.924804	ZK354.7	191294	IV	ZK354.7	XLOC_019970	ZK354.7	chrIV:5302132-5303070	no	no
WBGene00003699	-0.58803	0.58803	0.232616	0.999353	0.735323	-0.735323	0.06755	0.855466	nhr-109	173780	II	T12C9.5a	XLOC_004428	nhr-109	chrII:4433402-4435147	no	no
WBGene00019979	-0.813415	0.813415	0.0274975	0.837148	0.768922	-0.768922	0.5724	0.999956	R09B5.11	178634	V	R09B5.11	XLOC_026248	R09B5.11	chrV:998446-1689685	no	no
WBGene00001026	0.288579	-0.288579	0.095818	0.999353	-0.284746	0.284746	0.1646	0.989768	dnj-8	174093	II	C56C10.13a	XLOC_007196	dnj-8	chrII:6594665-6598038	no	yes
WBGene00009488	-1.06021	1.06021	0.0381305	0.946786	1.1574	-1.1574	0.41645	0.999956	oac-20	185375	V	F36G9.12	XLOC_028786	oac-20	chrV:15699960-16443388	no	yes
WBGene00010293	-0.486979	0.486979	0.0456326	0.999353	0.486829	-0.486829	0.3493	0.999956	fbxa-108	186560	V	F59A1.7	XLOC_032604	fbxa-108	chrV:17555827-17726691	no	yes
WBGene00001827	0.280254	-0.280254	0.111141	0.999353	-0.284977	0.284977	0.1437	0.962576	hcf-1	177560	IV	C46A5.9	XLOC_021136	hcf-1	chrIV:7771193-7774258	no	yes
WBGene00017219	-0.328671	0.328671	0.0676432	0.999353	0.267134	-0.267134	0.23625	0.999956	F07F6.7	260090	II	F07F6.7	XLOC_006945	F07F6.7	chrII:5422825-5423814	no	yes
WBGene00004508	0.346515	-0.346515	0.054899	0.999353	-0.348144	0.348144	0.29115	0.999956	rrf-1	172523	I	F26A3.8a	XLOC_002787	rrf-1	chrI:7643426-7649763	no	yes
WBGene00016823	0.412523	-0.412523	0.218956	0.999353	-0.470188	0.470188	0.0725	0.8566	C50E3.12	183663	V	C50E3.12	XLOC_030670	C50E3.12	chrV:7620636-7622010	no	no
WBGene00044696	-0.472442	0.472442	0.021265	0.749801	0.478422	-0.478422	0.74835	0.999956	F52E1.14	4363098	V	F52E1.14	XLOC_027309	F52E1.14	chrV:7731614-8569933	no	no
WBGene00000789	-0.386814	0.386814	0.14368	0.999353	0.37066	-0.37066	0.11115	0.931285	cpz-2	179818	V	M04G12.2	XLOC_028314	cpz-2	chrV:13381250-13382979	no	no
WBGene00019425	-0.53138	0.53138	0.2607	0.999353	0.825138	-0.825138	0.06115	0.846034	K06A1.2	187044	II	K06A1.2a	XLOC_004820	K06A1.2	chrII:6444610-6446102	no	no
WBGene00010650	0.433287	-0.433287	0.157189	0.999353	-0.482445	0.482445	0.10135	0.91622	K08C9.1	173034	I	K08C9.1	XLOC_003367	K08C9.1	chrI:11484828-11486400	no	no
WBGene00001332	0.296554	-0.296554	0.145875	0.999353	-0.351344	0.351344	0.11015	0.931285	eri-1	176868	IV	T07A9.5a	XLOC_019139	eri-1	chrIV:415776-419951	no	yes
WBGene00003753	-0.925591	0.925591	0.157285	0.999353	1.51451	-1.51451	0.1023	0.91622	nlp-15	173174	I	CC4.2	XLOC_001675	nlp-15	chrI:12988263-12995124	no	no
WBGene00009493	-0.405538	0.405538	0.155413	0.999353	0.438632	-0.438632	0.1041	0.919557	hrg-4	185380	IV	F36H1.5b	XLOC_021709	hrg-4	chrIV:11030197-11030971	no	yes
WBGene00015089	0.456997	-0.456997	0.0908929	0.999353	-0.356186	0.356186	0.17845	0.999956	B0252.5	181888	II	B0252.5	XLOC_007263	B0252.5	chrII:6917006-6918878	no	yes
WBGene00003045	0.280218	-0.280218	0.155046	0.999353	-0.373876	0.373876	0.10475	0.919557	lir-2	174239	II	F18A1.4a	XLOC_005048	lir-2	chrII:7667955-7671744	no	yes
WBGene00019458	0.271971	-0.271971	0.162933	0.999353	-0.363781	0.363781	0.09965	0.914482	K06H7.7	187078	III	K06H7.7	XLOC_011260	K06H7.7	chrIII:8083719-8085399	no	yes
WBGene00017464	-0.660205	0.660205	0.147443	0.999353	0.581595	-0.581595	0.1098	0.931285	sulp-2	180828	X	F14D12.5	XLOC_036584	sulp-2	chrX:5595900-5599228	no	no
WBGene00011924	0.577079	-0.577079	0.265403	0.999353	-0.751719	0.751719	0.0612	0.846034	T22C8.3	188731	II	T22C8.3	XLOC_007531	T22C8.3	chrII:8620494-8621923	no	no
WBGene00000796	0.320241	-0.320241	0.145415	0.999353	-0.324667	0.324667	0.11175	0.931285	crn-3	3565889	II	C14A4.4a	XLOC_005522	crn-3	chrII:10587983-10592499	no	no
WBGene00219838	-0.544866	0.544866	0.0514555	0.999353	0.55398	-0.55398	0.3173	0.999956	C28H8.14	NA	III		XLOC_009193	C28H8.14	chrIII:5916222-5916893	no	yes
WBGene00022638	0.647617	-0.647617	0.267275	0.999353	-1.10712	1.10712	0.06105	0.845958	scl-27	191204	V	ZK6.3	XLOC_026111	scl-27	chrV:400257-401603	no	no
WBGene00016374	0.294206	-0.294206	0.139406	0.999353	-0.323986	0.323986	0.1181	0.939515	swd-2.2	177561	IV	C33H5.7	XLOC_014022	swd-2.2	chrIV:7774528-7775775	no	yes
WBGene00002223	0.317951	-0.317951	0.103458	0.999353	-0.355349	0.355349	0.15895	0.981807	klp-12	178057	IV	T01G1.1a	XLOC_021771	klp-12	chrIV:11340389-11359774	no	yes
WBGene00019561	0.373569	-0.373569	0.115888	0.999353	-0.377771	0.377771	0.14205	0.959842	K09C6.7	178589	V	K09C6.7a	XLOC_029567	K09C6.7	chrV:835803-839074	no	no
WBGene00021614	-0.70069	0.70069	0.120862	0.999353	0.582367	-0.582367	0.1361	0.956652	Y47A7.2	178906	V	Y47A7.2	XLOC_030203	Y47A7.2	chrV:5196041-5198311	no	no
WBGene00016103	-0.307035	0.307035	0.111343	0.999353	0.294277	-0.294277	0.14735	0.967436	dpyd-1	180818	X	C25F6.3	XLOC_033800	dpyd-1	chrX:5467839-5472488	no	no
WBGene00003468	0.295881	-0.295881	0.148058	0.999353	-0.447199	0.447199	0.11145	0.931285	msp-113	259801	IV	ZK354.4	XLOC_012881	msp-113	chrIV:5297953-5298337	no	no
WBGene00013713	0.452091	-0.452091	0.143402	0.999353	-0.456147	0.456147	0.1155	0.93777	Y106G6G.4	260220	I	Y106G6G.4	XLOC_003214	Y106G6G.4	chrI:10321775-10323243	no	no
WBGene00019711	0.293632	-0.293632	0.132595	0.999353	-0.309084	0.309084	0.1258	0.944937	M01E11.2	172214	I	M01E11.2	XLOC_000595	M01E11.2	chrI:5579668-5581797	no	yes
WBGene00009124	0.300907	-0.300907	0.135311	0.999353	-0.323919	0.323919	0.12335	0.944434	rtel-1	172946	I	F25H2.13	XLOC_001336	rtel-1	chrI:10572018-10577003	no	yes
WBGene00016415	-0.320651	0.320651	0.181027	0.999353	0.362762	-0.362762	0.0922	0.895651	ampd-1	173891	II	C34F11.3a	XLOC_004556	ampd-1	chrII:5203315-5209655	no	no
WBGene00008018	0.637268	-0.637268	0.194652	0.999353	-0.678473	0.678473	0.0856	0.880211	tbc-8	176454	III	C38H2.1a	XLOC_009854	tbc-8	chrIII:10364971-10372960	no	no
WBGene00014171	-0.558691	0.558691	0.229936	0.999353	0.647786	-0.647786	0.0729	0.8566	nep-26	174593	II	ZK970.1a	XLOC_007828	nep-26	chrII:10284003-10288853	no	yes
WBGene00022788	-0.329637	0.329637	0.130643	0.999353	0.370199	-0.370199	0.12865	0.944937	slc-17.7	179308	V	ZK682.2	XLOC_030970	slc-17.7	chrV:9264081-9266385	no	no
WBGene00010947	-0.990844	0.990844	0.220104	0.999353	1.23699	-1.23699	0.07665	0.861319	M176.11	353402	II	M176.11	XLOC_005359	M176.11	chrII:9422210-9423032	no	no
WBGene00001196	0.305957	-0.305957	0.0999644	0.999353	-0.293562	0.293562	0.16965	0.995294	egl-30	171751	I	M01D7.7a	XLOC_000166	egl-30	chrI:1835937-1840890	no	yes
WBGene00018830	0.324979	-0.324979	0.199439	0.999353	-0.355625	0.355625	0.0848	0.878693	ska-3	175785	III	F54E7.8	XLOC_010904	ska-3	chrIII:5678016-5678943	no	yes
WBGene00020335	-0.851406	0.851406	0.209108	0.999353	0.909095	-0.909095	0.08105	0.870451	ttr-30	259716	X	T08A9.2	XLOC_034172	ttr-30	chrX:7331144-7331683	no	no
WBGene00020559	-0.492958	0.492958	0.137357	0.999353	0.443331	-0.443331	0.1235	0.944434	best-17	188585	III	T19C3.1	XLOC_010289	best-17	chrIII:607041-609970	no	no
WBGene00000419	0.276782	-0.276782	0.138544	0.999353	-0.311688	0.311688	0.1226	0.943182	ced-5	177942	IV	C02F4.1	XLOC_014487	ced-5	chrIV:10484104-10492610	no	yes
WBGene00019164	-0.413817	0.413817	0.141303	0.999353	0.362275	-0.362275	0.12085	0.939515	H06H21.8	186700	IV	H06H21.8a	XLOC_019638	H06H21.8	chrIV:4817513-4821066	no	yes
WBGene00008110	-0.292968	0.292968	0.0988486	0.999353	0.303565	-0.303565	0.1728	0.999951	C46C2.2	177744	IV	C46C2.2	XLOC_014259	C46C2.2	chrIV:9217737-9220157	no	yes
WBGene00004076	-0.395783	0.395783	0.154393	0.999353	0.390828	-0.390828	0.1103	0.931285	pod-2	173500	II	W09B6.1a	XLOC_003928	pod-2	chrII:1136807-1152382	no	yes
WBGene00185067	-0.32762	0.32762	0.0774099	0.999353	0.252911	-0.252911	0.22045	0.999956	Y54G11A.17	13187936	II	Y54G11A.17	XLOC_008379	Y54G11A.17	chrII:14348909-14349330	no	yes
WBGene00019024	-0.497559	0.497559	0.0973807	0.999353	0.377289	-0.377289	0.17475	0.999956	F58A6.5	173883	II	F58A6.5	XLOC_006898	F58A6.5	chrII:5146987-5148406	no	no
WBGene00015160	0.302211	-0.302211	0.218442	0.999353	-0.368746	0.368746	0.07835	0.866842	B0361.6	176028	III	B0361.6	XLOC_011139	B0361.6	chrIII:7275636-7277207	no	no
WBGene00219675	-0.0240025	0.0240025	0.929812	0.999353	-1.61808	1.61808	0.01845	0.596617	linc-44	NA	II		XLOC_007023	linc-44	chrII:5781900-5782093	no	yes
WBGene00018000	-1.35079	1.35079	0.0949798	0.999353	0.68875	-0.68875	0.1811	0.999956	F33D11.1	185224	I	F33D11.1	XLOC_000627	F33D11.1	chrI:5852047-5852877	no	yes
WBGene00044609	-0.315319	0.315319	0.153752	0.999353	0.366155	-0.366155	0.1119	0.931285	tbcc-1	3896741	III	Y71H2AM.24	XLOC_008744	tbcc-1	chrIII:2788436-2792926	no	yes
WBGene00014218	0.356769	-0.356769	0.149152	0.999353	-0.399495	0.399495	0.11535	0.93777	ZK1098.1	176343	III	ZK1098.1a	XLOC_009720	ZK1098.1	chrIII:9521991-9525260	no	yes
WBGene00006430	-0.306743	0.306743	0.0836149	0.999353	0.272797	-0.272797	0.20635	0.999956	tag-51	175245	III	K02F3.1	XLOC_008548	tag-51	chrIII:854228-856422	no	yes
WBGene00010191	-0.636252	0.636252	0.301723	0.999353	0.872714	-0.872714	0.05725	0.838974	dmsr-1	186437	V	F57B7.1a	XLOC_027918	dmsr-1	chrV:11438799-11441399	no	no
WBGene00016939	-0.30883	0.30883	0.0914058	0.999353	0.297827	-0.297827	0.18885	0.999956	C55B6.1	180984	X	C55B6.1a	XLOC_034144	C55B6.1	chrX:7200343-7203780	no	no
WBGene00002100	0.334909	-0.334909	0.505088	0.999353	-1.24425	1.24425	0.03425	0.709793	ins-17	175585	III	F56F3.6	XLOC_010729	ins-17	chrIII:4477065-4477490	no	yes
WBGene00018164	0.306631	-0.306631	0.191492	0.999353	-0.454472	0.454472	0.0914	0.892323	sup-36	177422	IV	F38A5.7	XLOC_013746	sup-36	chrIV:6601694-6602264	no	yes
WBGene00016968	0.404752	-0.404752	0.194201	0.999353	-0.396604	0.396604	0.0901	0.892323	epg-5	3565794	II	C56C10.12	XLOC_007198	epg-5	chrII:6603408-6609324	no	yes
WBGene00007331	-0.465176	0.465176	0.184434	0.999353	0.487227	-0.487227	0.09445	0.901422	pho-11	174547	II	C05C10.4	XLOC_005411	pho-11	chrII:9931803-9934305	no	yes
WBGene00016680	0.531301	-0.531301	0.0958603	0.999353	-0.482363	0.482363	0.18115	0.999956	C45G9.9	175687	III	C45G9.9	XLOC_010830	C45G9.9	chrIII:5054605-5055718	no	yes
WBGene00019197	0.375274	-0.375274	0.197305	0.999353	-0.547969	0.547969	0.0887	0.889202	H14A12.5	186742	III	H14A12.5	XLOC_011167	H14A12.5	chrIII:7467529-7468024	no	yes
WBGene00011094	-0.413228	0.413228	0.167681	0.999353	0.478441	-0.478441	0.10415	0.919557	R07B7.10	187658	V	R07B7.10	XLOC_028068	R07B7.10	chrV:12084406-12086281	no	no
WBGene00043985	-0.642884	0.642884	0.257143	0.999353	0.77074	-0.77074	0.06775	0.855466	C44C10.11	181355	X	C44C10.11	XLOC_037590	C44C10.11	chrX:11708201-11710117	no	no
WBGene00017339	-0.520504	0.520504	0.0934504	0.999353	0.376906	-0.376906	0.18545	0.999956	F10D7.2	181765	X	F10D7.2	XLOC_038399	F10D7.2	chrX:17364825-17368565	no	no
WBGene00013514	0.502323	-0.502323	0.243138	0.999353	-0.587844	0.587844	0.07185	0.8566	Y73F4A.1	177723	IV	Y73F4A.1	XLOC_021338	Y73F4A.1	chrIV:9044067-9045279	no	no
WBGene00008841	0.758682	-0.758682	0.222337	0.999353	-0.620273	0.620273	0.07825	0.866842	F15A4.6	174887	II	F15A4.6	XLOC_005811	F15A4.6	chrII:12471759-12472952	no	no
WBGene00010366	0.563369	-0.563369	0.0282063	0.847678	-0.632933	0.632933	0.61545	0.999956	H05L14.1	172575	I	H05L14.1	XLOC_002827	H05L14.1	chrI:7741935-8394405	no	no
WBGene00010725	-0.350648	0.350648	0.0729936	0.999353	0.278753	-0.278753	0.24025	0.999956	erv-46	181652	X	K09E9.2	XLOC_038201	erv-46	chrX:15614350-15616446	no	no
WBGene00010063	-0.644147	0.644147	0.178297	0.999353	0.561957	-0.561957	0.0987	0.914482	dhrs-4	179772	V	F54F3.4	XLOC_028237	dhrs-4	chrV:12922604-12924099	no	no
WBGene00022021	0.297318	-0.297318	0.117976	0.999353	-0.291732	0.291732	0.1502	0.97058	Y61A9LA.10	178851	V	Y61A9LA.10	XLOC_030112	Y61A9LA.10	chrV:4607197-4615794	no	yes
WBGene00015650	-0.438366	0.438366	0.141023	0.999353	0.379288	-0.379288	0.12545	0.944937	pkg-2	177659	IV	C09G4.2a	XLOC_014150	pkg-2	chrIV:8520882-8537726	no	yes
WBGene00019341	-0.417123	0.417123	0.0213065	0.749801	0.389813	-0.389813	0.82845	0.999956	K02F6.7	173604	II	K02F6.7	XLOC_006514	K02F6.7	chrII:2443296-4279128	no	yes
WBGene00019111	-0.714733	0.714733	0.17672	0.999353	0.569416	-0.569416	0.10035	0.914482	F59E11.5	179278	V	F59E11.5	XLOC_027428	F59E11.5	chrV:8995078-8996170	no	no
WBGene00019188	-0.58368	0.58368	0.0804446	0.999353	0.770003	-0.770003	0.22	0.999956	H11E01.3	180495	X	H11E01.3	XLOC_033152	H11E01.3	chrX:1489666-1663611	no	no
WBGene00018609	0.275218	-0.275218	0.245716	0.999353	-0.38409	0.38409	0.07205	0.8566	F48E8.2	175752	III	F48E8.2	XLOC_009115	F48E8.2	chrIII:5464358-5467506	no	no
WBGene00011307	0.897254	-0.897254	0.114174	0.999353	-0.608235	0.608235	0.15565	0.976268	mpst-7	187919	V	R186.6	XLOC_031800	mpst-7	chrV:12955270-12961113	no	yes
WBGene00020426	-0.79698	0.79698	0.0740913	0.999353	0.791587	-0.791587	0.24015	0.999956	T10H10.2	180538	X	T10H10.2	XLOC_033261	T10H10.2	chrX:2291546-2321452	no	no
WBGene00008143	0.37523	-0.37523	0.156454	0.999353	-0.414945	0.414945	0.11395	0.933445	C47E8.4	179970	V	C47E8.4a	XLOC_032091	C47E8.4	chrV:14683808-14685462	no	yes
WBGene00007621	0.333988	-0.333988	0.227494	0.999353	-0.374424	0.374424	0.0784	0.866842	C16C2.4	172821	I	C16C2.4a	XLOC_003123	C16C2.4	chrI:9712972-9715212	no	yes
WBGene00004507	-0.522068	0.522068	0.174615	0.999353	0.544267	-0.544267	0.10235	0.91622	rpy-1	174105	II	C18H9.7	XLOC_007213	rpy-1	chrII:6702461-6705402	no	no
WBGene00020783	-0.293562	0.293562	0.217644	0.999353	0.391637	-0.391637	0.08225	0.873663	blos-4	188869	II	T24H7.4	XLOC_004772	blos-4	chrII:6245722-6246137	no	yes
WBGene00020373	-0.746778	0.746778	0.271818	0.999353	0.942324	-0.942324	0.0659	0.850742	gpx-6	188313	IV		XLOC_014094	gpx-6	chrIV:8222217-8223376	no	no
WBGene00045308	-0.625045	0.625045	0.0308807	0.876725	0.812186	-0.812186	0.5808	0.999956	C37H5.14	6418705	V	C37H5.14a	XLOC_030137	C37H5.14	chrV:4827350-4835920	no	yes
WBGene00077682	0.833132	-0.833132	0.263453	0.999353	-0.945404	0.945404	0.0683	0.855466	F58B4.7	6418748	V	F58B4.7	XLOC_031306	F58B4.7	chrV:10922966-10923308	no	no
WBGene00010498	0.297271	-0.297271	0.137361	0.999353	-0.326397	0.326397	0.1313	0.949057	K02B12.5	172642	I	K02B12.5	XLOC_002900	K02B12.5	chrI:8517527-8526615	no	yes
WBGene00000271	0.303772	-0.303772	0.124474	0.999353	-0.297847	0.297847	0.14505	0.964447	brf-1	174199	II	F45E12.2a	XLOC_004984	brf-1	chrII:7305829-7308387	no	yes
WBGene00017144	0.279491	-0.279491	0.147738	0.999353	-0.325652	0.325652	0.12275	0.943716	brap-2	173917	II	EEED8.16	XLOC_006938	brap-2	chrII:5390419-5393169	no	yes
WBGene00000822	-0.300096	0.300096	0.0975448	0.999353	0.2743	-0.2743	0.18585	0.999956	csq-1	181563	X	F40E10.3	XLOC_035363	csq-1	chrX:14684808-14688099	no	no
WBGene00020370	0.662474	-0.662474	0.171531	0.999353	-1.02923	1.02923	0.10605	0.921856	T08H10.3	178843	V	T08H10.3a	XLOC_026665	T08H10.3	chrV:4471425-4473588	no	no
WBGene00010844	0.278753	-0.278753	0.165776	0.999353	-0.331954	0.331954	0.11005	0.931285	prp-3	176461	III	M03C11.7	XLOC_011662	prp-3	chrIII:10424124-10427886	no	yes
WBGene00003658	-0.383338	0.383338	0.147571	0.999353	0.404454	-0.404454	0.12425	0.944937	nhr-68	179589	V	H12C20.3a	XLOC_027957	nhr-68	chrV:11573441-11575536	no	no
WBGene00000466	0.307171	-0.307171	0.133462	0.999353	-0.305886	0.305886	0.13775	0.956652	cel-1	172814	I	C03D6.3a	XLOC_001182	cel-1	chrI:9665301-9668427	no	yes
WBGene00006351	-0.385536	0.385536	0.193536	0.999353	0.36554	-0.36554	0.0951	0.901565	sur-5	180992	X	K03A1.5	XLOC_036905	sur-5	chrX:7301714-7305524	no	no
WBGene00019762	0.279035	-0.279035	0.131292	0.999353	-0.29387	0.29387	0.14035	0.95711	M03F8.3	178979	V	M03F8.3a	XLOC_026890	M03F8.3	chrV:5940015-5943159	no	no
WBGene00003655	0.45186	-0.45186	0.115027	0.999353	-0.385235	0.385235	0.16045	0.984009	nhr-65	180230	V	Y17D7A.3a	XLOC_029229	nhr-65	chrV:18839288-18845259	no	no
WBGene00007187	0.321876	-0.321876	0.126034	0.999353	-0.319254	0.319254	0.1474	0.967436	tag-342	176331	III	B0464.8	XLOC_009714	tag-342	chrIII:9468072-9469739	no	yes
WBGene00010296	-0.600229	0.600229	0.0411429	0.969443	0.559585	-0.559585	0.4529	0.999956	dgat-2	180160	V	F59A1.10	XLOC_029078	dgat-2	chrV:17555827-17726691	no	yes
WBGene00014004	0.300974	-0.300974	0.146195	0.999353	-0.330681	0.330681	0.1275	0.944937	fic-1	177990	IV	ZK593.8	XLOC_014565	fic-1	chrIV:10937450-10939779	no	yes
WBGene00004003	-0.440294	0.440294	0.133397	0.999353	0.394765	-0.394765	0.1402	0.95711	pgp-9	180165	V	C47A10.1	XLOC_029088	pgp-9	chrV:17755870-17764624	no	no
WBGene00008400	0.41604	-0.41604	0.0229788	0.769264	-0.436517	0.436517	0.8154	0.999956	drh-3	172546	I	D2005.5	XLOC_000931	drh-3	chrI:7741935-8394405	no	yes
WBGene00004064	0.288772	-0.288772	0.161624	0.999353	-0.325942	0.325942	0.11605	0.93777	pms-2	179587	V	H12C20.2a	XLOC_031489	pms-2	chrV:11566870-11572949	no	no
WBGene00012692	0.290804	-0.290804	0.293221	0.999353	-0.405093	0.405093	0.06415	0.846661	Y39B6A.33	180246	V	Y39B6A.33	XLOC_029243	Y39B6A.33	chrV:19001926-19006165	no	yes
WBGene00000728	-1.63224	1.63224	0.00378102	0.275294	1.74407	-1.74407	5	0.33983	col-155	186301	V	F55C10.3	XLOC_031442	col-155	chrV:11388871-11389838	no	no
WBGene00013983	0.300086	-0.300086	0.111888	0.999353	-0.284325	0.284325	0.16925	0.995294	ZK512.2	176292	III	ZK512.2a	XLOC_011453	ZK512.2	chrIII:9141833-9144709	no	no
WBGene00044392	-0.684551	0.684551	0.276353	0.999353	0.92699	-0.92699	0.06875	0.855466	C25H3.16	3565401	II	C25H3.16	XLOC_004648	C25H3.16	chrII:5666291-5666744	no	yes
WBGene00011683	0.904769	-0.904769	0.298566	0.999353	-1.06107	1.06107	0.06355	0.846661	phat-6	181614	X	T10B10.6	XLOC_038122	phat-6	chrX:15193135-15194244	no	no
WBGene00219425	0.644525	-0.644525	0.0285131	0.850583	-0.544337	0.544337	0.6667	0.999956	Y54G2A.73	13192519	IV	Y54G2A.73a	XLOC_019382	Y54G2A.73	chrIV:1956724-4526957	no	no
WBGene00000143	0.28794	-0.28794	0.154064	0.999353	-0.315198	0.315198	0.1236	0.944434	apc-2	176139	III	K06H7.6	XLOC_009495	apc-2	chrIII:8080585-8083542	no	yes
WBGene00008583	1.14731	-1.14731	0.0966109	0.999353	-1.29289	1.29289	0.1976	0.999956	ugt-65	184205	IV	F08G5.5a	XLOC_014857	ugt-65	chrIV:12425205-12432488	no	no
WBGene00006820	-0.307263	0.307263	0.0803726	0.999353	0.326879	-0.326879	0.2373	0.999956	unc-89	171990	I	C09D1.1a	XLOC_000398	unc-89	chrI:4035894-4090429	no	no
WBGene00012342	0.254667	-0.254667	0.149987	0.999353	-0.305742	0.305742	0.1276	0.944937	mtr-4	177824	IV	W08D2.7	XLOC_014359	mtr-4	chrIV:9825678-9830462	no	yes
WBGene00044236	-0.343558	0.343558	0.111046	0.999353	0.307294	-0.307294	0.17225	0.999407	C17E4.11	3565408	I	C17E4.11	XLOC_003043	C17E4.11	chrI:9420053-9420798	no	yes
WBGene00019280	-0.573877	0.573877	0.0268589	0.831629	0.521429	-0.521429	0.71465	0.999956	K01A2.5	173418	II	K01A2.5a	XLOC_003803	K01A2.5	chrII:203458-732072	no	no
WBGene00006780	-0.304699	0.304699	0.0796589	0.999353	0.339945	-0.339945	0.2446	0.999956	unc-44	177366	IV	B0350.2a	XLOC_013364	unc-44	chrIV:5975563-6004021	no	yes
WBGene00001134	0.285335	-0.285335	0.129818	0.999353	-0.293228	0.293228	0.1494	0.96949	eat-3	174476	II	D2013.5	XLOC_005334	eat-3	chrII:9324828-9329227	no	yes
WBGene00009182	0.321758	-0.321758	0.303741	0.999353	-0.560287	0.560287	0.0636	0.846661	F26H11.4	175099	II	F26H11.4	XLOC_006025	F26H11.4	chrII:14408674-14410733	no	yes
WBGene00021635	-0.700352	0.700352	0.036806	0.93195	0.750582	-0.750582	0.5266	0.999956	Y47G6A.5	189992	I	Y47G6A.5a	XLOC_000344	Y47G6A.5	chrI:3233392-3600680	no	yes
WBGene00010133	0.834327	-0.834327	0.0932221	0.999353	-1.58251	1.58251	0.2099	0.999956	F55H12.2	259388	I	F55H12.2	XLOC_001066	F55H12.2	chrI:8867969-8868143	no	yes
WBGene00009346	0.380357	-0.380357	0.197729	0.999353	-0.450852	0.450852	0.09765	0.912517	F32H2.10	260106	I	F32H2.10	XLOC_001080	F32H2.10	chrI:8970307-8970956	no	yes
WBGene00003209	0.322287	-0.322287	0.095458	0.999353	-0.258093	0.258093	0.20395	0.999956	mel-26	172737	I	ZK858.4a	XLOC_001105	mel-26	chrI:9132535-9135235	no	yes
WBGene00009176	0.295505	-0.295505	0.191041	0.999353	-0.366822	0.366822	0.1017	0.91622	nmat-2	172754	I	F26H9.4	XLOC_003024	nmat-2	chrI:9305842-9306811	no	yes
WBGene00002986	0.304718	-0.304718	0.126513	0.999353	-0.318984	0.318984	0.15365	0.974587	lig-4	176067	III	C07H6.1	XLOC_009422	lig-4	chrIII:7521403-7524646	no	yes
WBGene00013556	0.238839	-0.238839	0.468445	0.999353	-0.624838	0.624838	0.0417	0.772572	Y75B8A.23	190709	III	Y75B8A.23	XLOC_010068	Y75B8A.23	chrIII:12250576-12250889	no	yes
WBGene00019491	0.402302	-0.402302	0.140682	0.999353	-0.393198	0.393198	0.1373	0.956652	K07E3.2	187111	X	K07E3.2	XLOC_034311	K07E3.2	chrX:8104258-8107357	no	no
WBGene00006675	0.490592	-0.490592	0.207237	0.999353	-0.581048	0.581048	0.0938	0.901422	twk-22	181703	X	T01B4.2a	XLOC_035614	twk-22	chrX:16306513-16314556	no	no
WBGene00012120	0.790163	-0.790163	0.199982	0.999353	-0.77745	0.77745	0.09775	0.912723	T28C6.5	189036	IV	T28C6.5	XLOC_014188	T28C6.5	chrIV:8821517-8822787	no	no
WBGene00003568	0.434879	-0.434879	0.097025	0.999353	-0.342745	0.342745	0.1994	0.999956	ncx-3	177963	IV	ZC168.1	XLOC_014529	ncx-3	chrIV:10716635-10721499	no	no
WBGene00003393	0.274435	-0.274435	0.131171	0.999353	-0.285509	0.285509	0.1488	0.969021	mog-5	173920	II	EEED8.5	XLOC_004592	mog-5	chrII:5399521-5405609	no	no
WBGene00014158	0.323254	-0.323254	0.108671	0.999353	-0.320679	0.320679	0.17835	0.999956	ZK938.1	191467	II	ZK938.1	XLOC_005403	ZK938.1	chrII:9829432-9830637	no	no
WBGene00014061	-1.27566	1.27566	0.139148	0.999353	1.19369	-1.19369	0.14055	0.957916	ZK673.5	174610	II	ZK673.5	XLOC_005500	ZK673.5	chrII:10457725-10462608	no	no
WBGene00016509	-0.276154	0.276154	0.0888063	0.999353	0.24293	-0.24293	0.2232	0.999956	adss-1	178872	V	C37H5.6a	XLOC_030134	adss-1	chrV:4819138-4823226	no	yes
WBGene00006738	-0.43774	0.43774	0.0269206	0.831629	0.433087	-0.433087	0.73645	0.999956	ulp-3	3565434	IV	Y48A5A.2	XLOC_012209	ulp-3	chrIV:1956724-4526957	no	yes
WBGene00008542	-0.511528	0.511528	0.141609	0.999353	0.455614	-0.455614	0.1396	0.95711	scav-6	184107	I	F07A5.3	XLOC_000875	scav-6	chrI:7354491-7357125	no	yes
WBGene00002201	0.30288	-0.30288	0.091616	0.999353	-0.282773	0.282773	0.21595	0.999956	kin-18	175862	III	T17E9.1a	XLOC_009222	kin-18	chrIII:6118842-6123736	no	yes
WBGene00015141	-0.337007	0.337007	0.132598	0.999353	0.326283	-0.326283	0.14965	0.96949	ugt-46	180404	X	B0310.5a	XLOC_035823	ugt-46	chrX:526073-530139	no	no
WBGene00006530	-0.309715	0.309715	0.133493	0.999353	0.291317	-0.291317	0.14835	0.968244	tba-4	174680	II	F44F4.11	XLOC_005560	tba-4	chrII:10918657-10920102	no	no
WBGene00009987	0.304806	-0.304806	0.222958	0.999353	-0.365963	0.365963	0.08945	0.891379	tbcb-1	186176	V	F53F4.3	XLOC_028349	tbcb-1	chrV:13592120-13592966	no	yes
WBGene00012699	1.61651	-1.61651	0.0199469	0.749184	-1.39527	1.39527	1	1	Y39B6A.41	189732	V	Y39B6A.41	XLOC_032767	Y39B6A.41	chrV:18970533-18977947	no	yes
WBGene00019346	-0.676581	0.676581	0.130789	0.999353	0.493267	-0.493267	0.15245	0.974587	K02G10.5	180742	X	K02G10.5a	XLOC_036452	K02G10.5	chrX:4687979-4691288	no	no
WBGene00000562	1.46474	-1.46474	0.0200305	0.749184	-2.33357	2.33357	1	1	cng-1	180004	V		XLOC_032153	cng-1	chrV:15025767-15031456	no	yes
WBGene00002324	0.321842	-0.321842	0.124387	0.999353	-0.329081	0.329081	0.1612	0.985217	let-49	173353	I	Y54E5B.3a	XLOC_001863	let-49	chrI:14820412-14821530	no	yes
WBGene00018343	-0.394435	0.394435	0.237627	0.999353	0.425906	-0.425906	0.0842	0.878693	F42A10.7	175875	III	F42A10.7	XLOC_010970	F42A10.7	chrIII:6177962-6178625	no	yes
WBGene00012530	-0.282151	0.282151	0.0878507	0.999353	0.254014	-0.254014	0.22815	0.999956	Y32F6A.5	179459	V	Y32F6A.5a	XLOC_031190	Y32F6A.5	chrV:10451345-10453582	no	no
WBGene00009256	0.297202	-0.297202	0.155346	0.999353	-0.321414	0.321414	0.13055	0.947094	tut-2	179483	V	F29F11.3	XLOC_027725	tut-2	chrV:10658228-10659575	no	yes
WBGene00003678	-0.51253	0.51253	0.0302487	0.876725	0.407246	-0.407246	0.6687	0.999956	nhr-88	173641	II	K08A2.5a	XLOC_004185	nhr-88	chrII:2443296-4279128	no	yes
WBGene00006605	0.29267	-0.29267	0.113832	0.999353	-0.340606	0.340606	0.17775	0.999956	tra-2	174137	II	C15F1.3a	XLOC_007268	tra-2	chrII:6955576-6965631	no	yes
WBGene00011977	0.340839	-0.340839	0.223756	0.999353	-0.572465	0.572465	0.09055	0.892323	T24B8.3	174444	II	T24B8.3a	XLOC_007615	T24B8.3	chrII:9059857-9061041	no	yes
WBGene00006660	-0.568304	0.568304	0.0279197	0.842894	0.440413	-0.440413	0.7266	0.999956	twk-5	174756	II	B0334.2a	XLOC_008020	twk-5	chrII:10968325-11503888	no	yes
WBGene00013892	0.334969	-0.334969	0.254151	0.999353	-0.385796	0.385796	0.0802	0.870451	ZC434.4	172902	I	ZC434.4	XLOC_003216	ZC434.4	chrI:10332034-10333050	no	yes
WBGene00015156	0.354474	-0.354474	0.0888355	0.999353	-0.269343	0.269343	0.22685	0.999956	B0361.2	176034	III	B0361.2a	XLOC_009397	B0361.2	chrIII:7293571-7308202	no	yes
WBGene00017322	-0.465801	0.465801	0.14917	0.999353	0.400754	-0.400754	0.1366	0.956652	clec-160	176167	III	F09G8.8	XLOC_011288	clec-160	chrIII:8272936-8275900	no	yes
WBGene00019867	-0.950542	0.950542	0.174202	0.999353	0.826103	-0.826103	0.11585	0.93777	R04B3.2	180550	X	R04B3.2	XLOC_036078	R04B3.2	chrX:2471584-2473576	no	no
WBGene00020339	-0.681294	0.681294	0.0680175	0.999353	0.471273	-0.471273	0.30015	0.999956	ttr-59	188262	X	T08A9.11a	XLOC_034171	ttr-59	chrX:7329935-7330521	no	no
WBGene00019847	0.592511	-0.592511	0.378327	0.999353	-2.08568	2.08568	0.05395	0.822527	R03G5.6	187543	X	R03G5.6a	XLOC_037005	R03G5.6	chrX:7806053-7809034	no	no
WBGene00009026	0.550472	-0.550472	0.273013	0.999353	-0.743366	0.743366	0.0748	0.858392	F21G4.5	184794	X	F21G4.5	XLOC_034600	F21G4.5	chrX:9906097-9907747	no	no
WBGene00019515	-0.875278	0.875278	0.0453111	0.999353	0.847249	-0.847249	0.4493	0.999956	ugt-19	187129	IV	K08B4.3	XLOC_020589	ugt-19	chrIV:6076758-6079933	no	no
WBGene00019311	-0.471163	0.471163	0.218095	0.999353	0.570172	-0.570172	0.0927	0.897045	K02E7.6	NA	II		XLOC_003918	K02E7.6	chrII:1057218-1058659	no	no
WBGene00000081	-0.435008	0.435008	0.0454546	0.999353	0.441427	-0.441427	0.44675	0.999956	ads-1	175192	III	Y50D7A.7	XLOC_010261	ads-1	chrIII:56859-463717	no	no
WBGene00022410	-0.848855	0.848855	0.0967013	0.999353	2.4786	-2.4786	0.21175	0.999956	Y97E10C.1	259630	V	Y97E10C.1	XLOC_027197	Y97E10C.1	chrV:7728927-7729403	no	yes
WBGene00006442	0.289965	-0.289965	0.159761	0.999353	-0.320791	0.320791	0.12865	0.944937	tag-65	179857	V	F58G11.5	XLOC_031918	tag-65	chrV:13676102-13678570	no	yes
WBGene00001461	-1.16002	1.16002	0.262805	0.999353	1.24092	-1.24092	0.07815	0.866842	flp-18	180587	X	Y48D7A.2	XLOC_036158	flp-18	chrX:3012406-3014268	no	no
WBGene00016742	0.775446	-0.775446	0.0371813	0.932056	-0.776507	0.776507	0.5523	0.999956	C48B6.4	183570	I	C48B6.4	XLOC_000815	C48B6.4	chrI:6554901-6936826	no	no
WBGene00010061	0.258919	-0.258919	0.119221	0.999353	-0.268845	0.268845	0.17295	0.999956	F54E12.2	178054	IV	F54E12.2	XLOC_021768	F54E12.2	chrIV:11333219-11336841	no	yes
WBGene00001597	0.259068	-0.259068	0.0964453	0.999353	-0.256228	0.256228	0.2142	0.999956	gld-3	174174	II	T07F8.3a	XLOC_004959	gld-3	chrII:7132600-7136826	no	yes
WBGene00009280	-0.41016	0.41016	0.124269	0.999353	0.423262	-0.423262	0.1666	0.995087	F31B9.3	185143	X	F31B9.3	XLOC_035562	F31B9.3	chrX:15923694-15924679	no	no
WBGene00010740	-0.998424	0.998424	0.0941376	0.999353	0.698567	-0.698567	0.22035	0.999956	K10D3.6	172448	I	K10D3.6	XLOC_002706	K10D3.6	chrI:7116327-7116654	no	no
WBGene00008084	-0.610912	0.610912	0.148986	0.999353	0.518239	-0.518239	0.1394	0.95711	C44C10.3	183452	X	C44C10.3	XLOC_034894	C44C10.3	chrX:11702468-11704224	no	no
WBGene00020259	0.271368	-0.271368	0.149031	0.999353	-0.301085	0.301085	0.1398	0.95711	T05E7.3	172306	I	T05E7.3	XLOC_000688	T05E7.3	chrI:6188173-6192454	no	yes
WBGene00009013	-0.314838	0.314838	0.104462	0.999353	0.26436	-0.26436	0.1999	0.999956	mrps-33	184770	IV	F21D5.8	XLOC_021285	mrps-33	chrIV:8739581-8740013	no	yes
WBGene00010049	-0.372479	0.372479	0.0813797	0.999353	0.278181	-0.278181	0.25645	0.999956	F54D5.3	174773	II	F54D5.3	XLOC_005683	F54D5.3	chrII:11571739-11572904	no	yes
WBGene00003576	0.27241	-0.27241	0.153271	0.999353	-0.298469	0.298469	0.1375	0.956652	ndc-80	177873	IV	W01B6.9	XLOC_014420	ndc-80	chrIV:10086125-10088289	no	yes
WBGene00003062	0.296905	-0.296905	0.144439	0.999353	-0.303047	0.303047	0.1458	0.965049	lpd-6	171886	I	K09H9.6	XLOC_002140	lpd-6	chrI:3144522-3147786	no	yes
WBGene00077701	-0.427399	0.427399	0.233437	0.999353	0.497759	-0.497759	0.09	0.892323	poml-3	6418581	I	E01A2.10	XLOC_002249	poml-3	chrI:4145352-4147097	no	yes
WBGene00008648	0.294677	-0.294677	0.189385	0.999353	-0.363308	0.363308	0.11145	0.931285	F10D11.2	172633	I	F10D11.2	XLOC_002881	F10D11.2	chrI:8436063-8438580	no	yes
WBGene00018878	0.338628	-0.338628	0.159698	0.999353	-0.370162	0.370162	0.1321	0.950369	glit-1	180747	X	F55D10.3	XLOC_033669	glit-1	chrX:4712266-4714827	no	no
WBGene00002187	-0.366571	0.366571	0.147436	0.999353	0.384098	-0.384098	0.14255	0.959842	kgb-1	176866	IV	T07A9.3	XLOC_019137	kgb-1	chrIV:405947-408886	no	no
WBGene00010711	0.925573	-0.925573	0.168758	0.999353	-0.867845	0.867845	0.12485	0.944937	K09B11.4	187192	IV	K09B11.4	XLOC_015012	K09B11.4	chrIV:13429515-13429944	no	no
WBGene00013202	0.352514	-0.352514	0.0623717	0.999353	0.442202	-0.442202	0.3393	0.999956	Y54E5A.7	173332	I	Y54E5A.7a	XLOC_001846	Y54E5A.7	chrI:14711173-14714741	no	yes
WBGene00008476	-0.337336	0.337336	0.479277	0.999353	0.777986	-0.777986	0.0444	0.777687	E03H4.8	184023	I	E03H4.8	XLOC_003500	E03H4.8	chrI:12424851-12426481	no	no
WBGene00015191	-0.417606	0.417606	0.0251807	0.813458	0.402954	-0.402954	0.8471	0.999956	B0432.10	173413	II	B0432.10	XLOC_006169	B0432.10	chrII:203458-732072	no	yes
WBGene00003825	-0.287464	0.287464	0.169645	0.999353	0.321616	-0.321616	0.12595	0.944937	ntl-2	173773	II	B0286.4a	XLOC_006785	ntl-2	chrII:4372949-4375719	no	yes
WBGene00004721	0.315854	-0.315854	0.173099	0.999353	-0.323181	0.323181	0.12345	0.944434	san-1	172342	I	ZC328.4	XLOC_000730	san-1	chrI:6407535-6409053	no	yes
WBGene00006535	0.589977	-0.589977	0.269192	0.999353	-0.685355	0.685355	0.0797	0.870451	tba-9	185538	X	F40F4.5	XLOC_033410	tba-9	chrX:3252950-3256164	no	no
WBGene00008971	0.35944	-0.35944	0.316807	0.999353	-0.619503	0.619503	0.0677	0.855466	F20C5.6	177687	IV	F20C5.6	XLOC_021293	F20C5.6	chrIV:8771940-8773172	no	no
WBGene00010149	0.3541	-0.3541	0.23626	0.999353	-0.526283	0.526283	0.09075	0.892323	F56D5.5	177772	IV	F56D5.5	XLOC_021393	F56D5.5	chrIV:9402045-9412411	no	no
WBGene00009120	0.307772	-0.307772	0.125637	0.999353	-0.293642	0.293642	0.1711	0.998092	F25H2.6	172940	I	F25H2.6	XLOC_001327	F25H2.6	chrI:10554625-10557620	no	yes
WBGene00020386	-0.781735	0.781735	0.213207	0.999353	0.725876	-0.725876	0.10075	0.914482	cyp-34A4	188350	V	T09H2.1	XLOC_026595	cyp-34A4	chrV:3950050-3951948	no	no
WBGene00001208	-0.456025	0.456025	0.337645	0.999353	0.6388	-0.6388	0.06395	0.846661	egl-44	174005	II	F28B12.2a	XLOC_004715	egl-44	chrII:5933512-5940204	no	no
WBGene00017126	-0.613156	0.613156	0.158652	0.999353	0.539235	-0.539235	0.1364	0.956652	E04F6.6	174182	II	E04F6.6	XLOC_007301	E04F6.6	chrII:7197479-7199324	no	yes
WBGene00006050	0.267949	-0.267949	0.120622	0.999353	-0.28483	0.28483	0.1802	0.999956	ssq-1	177835	IV	K07F5.11	XLOC_014365	ssq-1	chrIV:9852568-9853538	no	yes
WBGene00019456	0.369561	-0.369561	0.196258	0.999353	-0.453516	0.453516	0.11085	0.931285	K06H7.2	187077	III	K06H7.2	XLOC_009499	K06H7.2	chrIII:8093518-8096102	no	yes
WBGene00007725	0.719687	-0.719687	0.155071	0.999353	-0.597638	0.597638	0.1401	0.95711	C25F9.5	180272	V	C25F9.5	XLOC_032827	C25F9.5	chrV:19407709-19410570	no	no
WBGene00016431	-0.71792	0.71792	0.0294472	0.860293	0.804704	-0.804704	0.74245	0.999956	C35A11.4	178921	V	C35A11.4	XLOC_030229	C35A11.4	chrV:5260315-5403348	no	no
WBGene00002241	0.324806	-0.324806	0.209773	0.999353	-0.337407	0.337407	0.10405	0.919557	kup-1	179651	V	F10C2.2	XLOC_031596	kup-1	chrV:12032307-12040847	no	no
WBGene00018602	0.493771	-0.493771	0.20676	0.999353	-0.664106	0.664106	0.10535	0.919557	F48D6.4	180697	X	F48D6.4a	XLOC_036380	F48D6.4	chrX:4246712-4247110	no	no
WBGene00017178	0.327984	-0.327984	0.223312	0.999353	-0.421853	0.421853	0.09785	0.912929	atg-16.1	180717	X	F02E8.5	XLOC_036423	atg-16.1	chrX:4459843-4462584	no	no
WBGene00019959	0.303135	-0.303135	0.227276	0.999353	-0.407918	0.407918	0.09595	0.904572	R08E3.3	180757	X	R08E3.3a	XLOC_033690	R08E3.3	chrX:4818587-4821381	no	no
WBGene00000509	-0.282545	0.282545	0.158361	0.999353	0.333818	-0.333818	0.1383	0.95711	cka-1	177807	IV	C28D4.2a	XLOC_021459	cka-1	chrIV:9731998-9737602	no	yes
WBGene00001740	0.290563	-0.290563	0.206502	0.999353	-0.382051	0.382051	0.1064	0.92371	gro-1	175725	III	ZC395.6	XLOC_009094	gro-1	chrIII:5265096-5267091	no	no
WBGene00001768	0.520433	-0.520433	0.0220652	0.752389	0	0	1	1	gst-20	175008	II	Y48E1B.10	XLOC_008279	gst-20	chrII:13507760-13903274	no	no
WBGene00012983	-0.293592	0.293592	0.176503	0.999353	0.330067	-0.330067	0.12505	0.944937	men-1	175079	II	Y48B6A.12	XLOC_008365	men-1	chrII:14226515-14233728	no	no
WBGene00021881	-1.12565	1.12565	0.0824467	0.999353	1.50665	-1.50665	0.2684	0.999956	Y54G2A.16	177069	IV	Y54G2A.16a	XLOC_019368	Y54G2A.16	chrIV:1956724-4526957	no	no
WBGene00016004	-0.684268	0.684268	0.144281	0.999353	0.608367	-0.608367	0.1534	0.974587	C18H9.6	182809	II	C18H9.6	XLOC_007212	C18H9.6	chrII:6700666-6701379	no	no
WBGene00021662	-0.348532	0.348532	0.0745795	0.999353	0.276877	-0.276877	0.29835	0.999956	snpc-3.3	190031	I	Y48G1BL.1	XLOC_000025	snpc-3.3	chrI:216180-218955	no	yes
WBGene00003096	-0.359213	0.359213	0.142632	0.999353	0.360181	-0.360181	0.1559	0.976268	lys-7	178772	V	C02A12.4	XLOC_029942	lys-7	chrV:3481477-3482596	no	no
WBGene00017765	-0.288216	0.288216	0.128078	0.999353	0.277206	-0.277206	0.1742	0.999956	gcst-1	178960	V	F25B4.1	XLOC_026845	gcst-1	chrV:5712926-5714600	no	yes
WBGene00022705	0.340564	-0.340564	0.130597	0.999353	-0.341478	0.341478	0.17085	0.998092	ZK354.2	177310	IV	ZK354.2a	XLOC_012885	ZK354.2	chrIV:5313473-5315508	no	yes
WBGene00003614	0.303741	-0.303741	0.512909	0.999353	-0.856817	0.856817	0.0436	0.775898	nhr-15	178558	V	F33E11.1a	XLOC_026098	nhr-15	chrV:320357-323629	no	no
WBGene00010046	-0.370664	0.370664	0.169843	0.999353	0.403354	-0.403354	0.13215	0.950369	F54D1.1	186227	IV	F54D1.1	XLOC_014626	F54D1.1	chrIV:11261874-11262987	no	yes
WBGene00003160	0.265537	-0.265537	0.14317	0.999353	-0.281282	0.281282	0.15725	0.976785	mdf-1	179338	V	C50F4.11	XLOC_031011	mdf-1	chrV:9541920-9544200	no	yes
WBGene00010524	-0.463492	0.463492	0.186928	0.999353	0.476761	-0.476761	0.1204	0.939515	K03B8.6	186927	V	K03B8.6	XLOC_027905	K03B8.6	chrV:11407566-11409107	no	yes
WBGene00022797	-0.39379	0.39379	0.320737	0.999353	0.547045	-0.547045	0.0703	0.856312	best-24	176110	III	ZK688.2	XLOC_009466	best-24	chrIII:7900969-7904170	no	yes
WBGene00012247	-0.638026	0.638026	0.106874	0.999353	0.45031	-0.45031	0.21085	0.999956	W04E12.2	189189	V	W04E12.2	XLOC_032859	W04E12.2	chrV:19739774-19741006	no	no
WBGene00011564	0.0570819	-0.0570819	0.904396	0.999353	1.00185	-1.00185	0.02495	0.660609	ugt-50	181413	X	T07C5.1b	XLOC_035057	ugt-50	chrX:12691664-12695487	no	no
WBGene00021026	0.309022	-0.309022	0.282157	0.999353	-0.436239	0.436239	0.0801	0.870451	W04C9.4	171636	I	W04C9.4	XLOC_000039	W04C9.4	chrI:462002-462563	no	yes
WBGene00006934	0.334648	-0.334648	0.0746086	0.999353	-0.303636	0.303636	0.3035	0.999956	vps-54	179473	V	T21C9.2a	XLOC_031219	vps-54	chrV:10566631-10576383	no	yes
WBGene00019459	0.577802	-0.577802	0.136309	0.999353	-0.471246	0.471246	0.1663	0.994787	K06H7.8	187079	III	K06H7.8	XLOC_011261	K06H7.8	chrIII:8096669-8098086	no	yes
WBGene00006814	-0.401225	0.401225	0.135276	0.999353	0.362979	-0.362979	0.1677	0.995087	unc-82	177514	IV	B0496.3a	XLOC_013961	unc-82	chrIV:7424488-7444349	no	no
WBGene00018850	-0.410254	0.410254	0.364804	0.999353	0.834487	-0.834487	0.06245	0.846661	gpx-8	172983	I	F55A3.5	XLOC_003285	gpx-8	chrI:10782103-10782879	no	yes
WBGene00021559	0.273561	-0.273561	0.144068	0.999353	-0.302461	0.302461	0.1594	0.981807	Y45G5AM.7	178817	V	Y45G5AM.7a	XLOC_030048	Y45G5AM.7	chrV:4166838-4169736	no	yes
WBGene00018305	-0.271791	0.271791	0.112795	0.999353	0.265655	-0.265655	0.2037	0.999956	exos-8	174111	II	F41G3.14	XLOC_004883	exos-8	chrII:6741695-6742722	no	yes
WBGene00016323	0.318036	-0.318036	0.178859	0.999353	-0.317558	0.317558	0.1287	0.944937	C32E8.5	171946	I	C32E8.5	XLOC_000368	C32E8.5	chrI:3782139-3783183	no	yes
WBGene00003396	0.327156	-0.327156	0.172174	0.999353	-0.358518	0.358518	0.1336	0.956545	mom-4	172842	I	F52F12.3	XLOC_003153	mom-4	chrI:9895972-9900590	no	yes
WBGene00004083	-0.647773	0.647773	0.126142	0.999353	0.48509	-0.48509	0.1819	0.999956	pph-1	182242	V	C05A2.1	XLOC_027736	pph-1	chrV:10702544-10704462	no	no
WBGene00015545	-0.597895	0.597895	0.30956	0.999353	0.775677	-0.775677	0.07425	0.858007	C06G1.1	181720	X	C06G1.1a	XLOC_035663	C06G1.1	chrX:16633294-16637139	no	no
WBGene00016015	0.282706	-0.282706	0.140461	0.999353	-0.281225	0.281225	0.16445	0.989768	C23G10.8	175878	III	C23G10.8	XLOC_010976	C23G10.8	chrIII:6202707-6206151	no	yes
WBGene00012301	0.244769	-0.244769	0.28803	0.999353	-0.463659	0.463659	0.08015	0.870451	W06D11.3	189243	X	W06D11.3	XLOC_034998	W06D11.3	chrX:12298622-12299232	no	no
WBGene00010473	-0.83659	0.83659	0.33413	0.999353	1.25289	-1.25289	0.06935	0.856312	hrg-2	24104699	V	K01D12.14	XLOC_031677	hrg-2	chrV:12409395-12410462	no	no
WBGene00015207	0.337314	-0.337314	0.149866	0.999353	-0.331626	0.331626	0.15475	0.976268	B0495.8	174246	II	B0495.8a	XLOC_007385	B0495.8	chrII:7705650-7707416	no	no
WBGene00007256	0.274945	-0.274945	0.199059	0.999353	-0.315327	0.315327	0.1172	0.938642	swsn-9	172461	I	C01H6.7a	XLOC_000856	swsn-9	chrI:7224831-7227540	no	yes
WBGene00011575	0.869331	-0.869331	0.207345	0.999353	-0.781482	0.781482	0.11205	0.931285	madf-4	179386	V	T07C12.11	XLOC_031081	madf-4	chrV:9960847-9962450	no	no
WBGene00007394	-0.4243	0.4243	0.143738	0.999353	0.367431	-0.367431	0.1621	0.985989	C06H5.6	180170	V	C06H5.6a	XLOC_032635	C06H5.6	chrV:17879904-17888937	no	no
WBGene00220201	-0.40671	0.40671	0.307195	0.999353	0.681669	-0.681669	0.07585	0.858924	Y73B3A.30	NA	X		XLOC_035778	Y73B3A.30	chrX:47178-47506	no	no
WBGene00000990	-0.482416	0.482416	0.104923	0.999353	0.342281	-0.342281	0.22215	0.999956	dhs-27	180632	X	C04F6.5	XLOC_036243	dhs-27	chrX:3412962-3414693	no	no
WBGene00013701	0.789573	-0.789573	0.198265	0.999353	-0.718722	0.718722	0.1174	0.93935	Y106G6D.4	172876	I	Y106G6D.4	XLOC_001262	Y106G6D.4	chrI:10114781-10116547	no	no
WBGene00023408	-0.82931	0.82931	0.213174	0.999353	0.800054	-0.800054	0.1096	0.931285	cex-2	188309	II	T09A5.1a	XLOC_007411	cex-2	chrII:7833014-7835088	no	no
WBGene00019097	-0.334158	0.334158	0.209796	0.999353	0.389756	-0.389756	0.11265	0.931285	F59B1.2	178783	V	F59B1.2	XLOC_026559	F59B1.2	chrV:3633331-3634523	no	yes
WBGene00009884	0.29761	-0.29761	0.127386	0.999353	-0.281908	0.281908	0.18365	0.999956	F49C12.15	177759	IV	F49C12.15	XLOC_014273	F49C12.15	chrIV:9324453-9327433	no	yes
WBGene00001973	0.259587	-0.259587	0.140103	0.999353	-0.267976	0.267976	0.16785	0.995087	hmg-3	172250	I	C32F10.5	XLOC_002497	hmg-3	chrI:5815761-5818128	no	yes
WBGene00013134	0.474687	-0.474687	0.323396	0.999353	-1.03876	1.03876	0.0728	0.8566	hsf-2	NA	I		XLOC_003429	hsf-2	chrI:11968942-11969838	no	yes
WBGene00022497	-0.393457	0.393457	0.119099	0.999353	0.3014	-0.3014	0.1988	0.999956	Y119D3B.21	246006	III	Y119D3B.21	XLOC_008582	Y119D3B.21	chrIII:1214991-1215192	no	yes
WBGene00019642	0.422939	-0.422939	0.192791	0.999353	-0.450691	0.450691	0.12155	0.940432	K11C4.1	179078	V	K11C4.1	XLOC_027060	K11C4.1	chrV:6897006-6898438	no	no
WBGene00017335	0.546256	-0.546256	0.219885	0.999353	-0.557167	0.557167	0.1065	0.92371	F10D2.10	179101	V	F10D2.10	XLOC_030584	F10D2.10	chrV:7154544-7156157	no	no
WBGene00010744	-0.873303	0.873303	0.33364	0.999353	1.32641	-1.32641	0.0705	0.856312	K10D6.4	179549	V	K10D6.4a	XLOC_027854	K10D6.4	chrV:11201906-11216347	no	no
WBGene00001875	0.541164	-0.541164	0.0636668	0.999353	-0.45791	0.45791	0.37115	0.999956	his-1	191667	V	T10C6.14	XLOC_028802	his-1	chrV:15699960-16443388	no	no
WBGene00015561	-0.389116	0.389116	0.163301	0.999353	0.392398	-0.392398	0.1448	0.963997	C07A12.7	180723	X	C07A12.7a	XLOC_036429	C07A12.7	chrX:4517870-4521020	no	no
WBGene00002007	-0.26228	0.26228	0.136522	0.999353	0.274053	-0.274053	0.17285	0.999951	hsp-3	180880	X	C15H9.6a	XLOC_036681	hsp-3	chrX:6089355-6091728	no	no
WBGene00006646	-0.834794	0.834794	0.143257	0.999353	0.802998	-0.802998	0.16495	0.989954	tsp-20	181376	X	B0198.1	XLOC_037640	tsp-20	chrX:12032084-12033955	no	no
WBGene00011824	-0.483357	0.483357	0.31942	0.999353	0.684134	-0.684134	0.07415	0.858007	T18D3.7	188577	X	T18D3.7a	XLOC_035027	T18D3.7	chrX:12434086-12443172	no	no
WBGene00019216	0.535257	-0.535257	0.230085	0.999353	-0.564538	0.564538	0.1026	0.916298	H20J04.1	173770	II	H20J04.1	XLOC_004419	H20J04.1	chrII:4355674-4358819	no	no
WBGene00015157	0.284573	-0.284573	0.168559	0.999353	-0.310086	0.310086	0.1392	0.95711	B0361.3	176029	III	B0361.3	XLOC_009396	B0361.3	chrIII:7281399-7283771	no	no
WBGene00012567	0.592007	-0.592007	0.174983	0.999353	-0.575387	0.575387	0.13615	0.956652	Y37H2A.7	189630	V	Y37H2A.7	XLOC_032660	Y37H2A.7	chrV:18133271-18134450	no	yes
WBGene00016760	-0.537835	0.537835	0.16302	0.999353	0.468192	-0.468192	0.1468	0.965779	C49A9.6	177381	IV	C49A9.6	XLOC_013548	C49A9.6	chrIV:6210988-6212885	no	yes
WBGene00015115	1.40647	-1.40647	0.113857	0.999353	-3.28147	3.28147	0.21005	0.999956	B0286.1	173774	II	B0286.1	XLOC_004422	B0286.1	chrII:4378838-4386208	no	yes
WBGene00010877	-0.650039	0.650039	0.196338	0.999353	0.605534	-0.605534	0.1216	0.940432	lact-4	174356	II	M05D6.4	XLOC_007510	lact-4	chrII:8477976-8480422	no	yes
WBGene00020763	0.279268	-0.279268	0.170377	0.999353	-0.305767	0.305767	0.1401	0.95711	ztf-18	175250	III	T24C4.7	XLOC_010328	ztf-18	chrIII:889943-895593	no	yes
WBGene00044452	1.04138	-1.04138	0.0718582	0.999353	-0.500378	0.500378	0.33375	0.999956	Y102E9.5	3896742	III	Y102E9.5	XLOC_011045	Y102E9.5	chrIII:6728099-6730115	no	yes
WBGene00004450	0.241169	-0.241169	0.23923	0.999353	-0.349666	0.349666	0.1003	0.914482	rpl-36	176007	III	F37C12.4	XLOC_009375	rpl-36	chrIII:7180189-7180554	no	yes
WBGene00044175	-1.09418	1.09418	0.13341	0.999353	0.76326	-0.76326	0.17995	0.999956	fipr-9	3565930	V	C12D8.19	XLOC_027644	fipr-9	chrV:10221672-10221937	no	no
WBGene00002146	-0.370345	0.370345	0.212492	0.999353	0.464762	-0.464762	0.1127	0.931285	ipp-5	180871	X	C09B8.1a	XLOC_033918	ipp-5	chrX:6031436-6034002	no	no
WBGene00015097	0.451331	-0.451331	0.167958	0.999353	-0.482691	0.482691	0.1422	0.959842	B0273.1	177333	IV	B0273.1a	XLOC_012996	B0273.1	chrIV:5494224-5495195	no	no
WBGene00194935	0.247124	-0.247124	0.686555	0.999353	-0.910897	0.910897	0.03485	0.716231	M02G9.4	13186765	II	M02G9.4a	XLOC_005471	M02G9.4	chrII:10317251-10317527	no	no
WBGene00017066	0.353104	-0.353104	0.0283977	0.850583	-0.343843	0.343843	0.8518	0.999956	maco-1	183963	I	D2092.5	XLOC_002632	maco-1	chrI:6554901-6936826	no	no
WBGene00020566	-0.726076	0.726076	0.274159	0.999353	0.836629	-0.836629	0.08825	0.888998	ttr-7	175213	III	T19C3.9	XLOC_008519	ttr-7	chrIII:606070-606925	no	no
WBGene00004898	-0.61402	0.61402	0.273444	0.999353	0.790375	-0.790375	0.0887	0.889202	snb-2	179692	V	F23H12.1	XLOC_031661	snb-2	chrV:12344442-12345888	no	yes
WBGene00000233	-0.498248	0.498248	0.189593	0.999353	0.483539	-0.483539	0.12845	0.944937	avr-15	179834	V	R11G10.1a	XLOC_031891	avr-15	chrV:13498925-13511612	no	yes
WBGene00017319	-0.307002	0.307002	0.107709	0.999353	0.252215	-0.252215	0.22585	0.999956	mrps-9	184267	III	F09G8.3	XLOC_009539	mrps-9	chrIII:8265990-8267660	no	yes
WBGene00007008	0.290862	-0.290862	0.174657	0.999353	-0.296858	0.296858	0.13955	0.95711	rfp-1	176180	III	R05D3.4a	XLOC_009555	rfp-1	chrIII:8358554-8362016	no	yes
WBGene00014228	0.278639	-0.278639	0.122212	0.999353	-0.28623	0.28623	0.1989	0.999956	mett-10	191526	III	ZK1128.2a	XLOC_009822	mett-10	chrIII:10114950-10116612	no	yes
WBGene00022667	0.300537	-0.300537	0.214233	0.999353	-0.382005	0.382005	0.1136	0.933189	ZK154.5	181039	X	ZK154.5	XLOC_037001	ZK154.5	chrX:7783385-7787874	no	no
WBGene00008692	-0.551502	0.551502	0.208556	0.999353	0.495375	-0.495375	0.1168	0.938324	scav-4	181429	X	F11C1.3	XLOC_035096	scav-4	chrX:12981790-12985684	no	no
WBGene00006741	-0.727519	0.727519	0.242195	0.999353	0.746555	-0.746555	0.10075	0.914482	unc-1	180458	X	K03E6.5a	XLOC_035891	unc-1	chrX:1057827-1062440	no	no
WBGene00011507	0.272952	-0.272952	0.136772	0.999353	-0.265204	0.265204	0.17875	0.999956	T05H10.1	174290	II	T05H10.1	XLOC_005117	T05H10.1	chrII:8042536-8046975	no	yes
WBGene00012158	-0.282388	0.282388	0.11416	0.999353	0.258693	-0.258693	0.21415	0.999956	ucr-2.1	181374	X	VW06B3R.1a	XLOC_034940	ucr-2.1	chrX:12018370-12020991	no	no
WBGene00017647	0.452836	-0.452836	0.209865	0.999353	-0.466388	0.466388	0.11675	0.938324	F20H11.4	175937	III	F20H11.4	XLOC_009290	F20H11.4	chrIII:6608659-6610278	no	yes
WBGene00000625	-1.16366	1.16366	0.0354012	0.924679	0.984109	-0.984109	0.6936	0.999956	col-48	171873	I	Y54E10BL.2	XLOC_000296	col-48	chrI:3006030-3013447	no	yes
WBGene00003687	-0.314926	0.314926	0.118738	0.999353	0.26261	-0.26261	0.2067	0.999956	nhr-97	177810	IV	H27C11.1a	XLOC_014351	nhr-97	chrIV:9757783-9763539	no	no
WBGene00044529	-0.172969	0.172969	0.734593	0.999353	0.986807	-0.986807	0.03355	0.709092	irld-1	3896819	V	D2063.4a	XLOC_026657	irld-1	chrV:4336674-4338862	no	yes
WBGene00004358	-0.300692	0.300692	0.167545	0.999353	0.294372	-0.294372	0.14805	0.968244	rhr-1	178927	V	F08F3.3	XLOC_026794	rhr-1	chrV:5428200-5430230	no	yes
WBGene00235325	-1.27088	1.27088	0.0319919	0.890878	0.512287	-0.512287	0.77455	0.999956	C08D8.7	24104187	V	C08D8.7	XLOC_027300	C08D8.7	chrV:7731614-8569933	no	yes
WBGene00014250	0.349854	-0.349854	0.181171	0.999353	-0.333009	0.333009	0.13705	0.956652	ZK1307.9	174518	II	ZK1307.9	XLOC_005387	ZK1307.9	chrII:9649431-9650828	no	yes
WBGene00012207	0.401088	-0.401088	0.0339822	0.910566	-0.40185	0.40185	0.73065	0.999956	W02B12.12	174755	II	W02B12.12a	XLOC_008018	W02B12.12	chrII:10968325-11503888	no	yes
WBGene00003020	0.275509	-0.275509	0.142109	0.999353	-0.274129	0.274129	0.17435	0.999956	lin-35	172249	I	C32F10.2	XLOC_000620	lin-35	chrI:5807732-5815332	no	yes
WBGene00010323	-0.534689	0.534689	0.263397	0.999353	0.585311	-0.585311	0.0942	0.901422	dhhc-12	186602	I	F59C6.2	XLOC_001320	dhhc-12	chrI:10522140-10523894	no	yes
WBGene00007536	-0.384413	0.384413	0.267331	0.999353	0.546032	-0.546032	0.09225	0.895651	daf-36	179422	V	C12D8.5	XLOC_031133	daf-36	chrV:10223529-10225633	no	no
WBGene00017306	-0.464931	0.464931	0.451428	0.999353	0.995206	-0.995206	0.05485	0.823383	F09F9.1	184262	X	F09F9.1	XLOC_033561	F09F9.1	chrX:4115313-4116809	no	no
WBGene00019205	-0.27851	0.27851	0.20984	0.999353	0.366995	-0.366995	0.11785	0.93935	kcc-2	177370	IV	H16O14.1a	XLOC_013405	kcc-2	chrIV:6040963-6073953	no	no
WBGene00008508	0.374897	-0.374897	0.323474	0.999353	-0.546198	0.546198	0.07625	0.860956	F01G10.5	177904	IV	F01G10.5	XLOC_021576	F01G10.5	chrIV:10228077-10230903	no	no
WBGene00011289	-0.612495	0.612495	0.138102	0.999353	0.482685	-0.482685	0.17965	0.999956	R102.2	177959	IV	R102.2	XLOC_014523	R102.2	chrIV:10687680-10688054	no	no
WBGene00001843	-0.306306	0.306306	0.130224	0.999353	0.283703	-0.283703	0.19115	0.999956	hgo-1	172726	I	W06D4.1	XLOC_002987	hgo-1	chrI:9049531-9055328	no	yes
WBGene00018744	-0.450868	0.450868	0.166906	0.999353	0.433982	-0.433982	0.14905	0.969469	F53B3.6	180576	X	F53B3.6	XLOC_033349	F53B3.6	chrX:2864441-2865463	no	no
WBGene00013979	0.319208	-0.319208	0.33923	0.999353	-0.589149	0.589149	0.07345	0.8566	ZK507.3	191337	III	ZK507.3	XLOC_009658	ZK507.3	chrIII:9101289-9103018	no	yes
WBGene00008651	-0.80495	0.80495	0.119161	0.999353	0.524271	-0.524271	0.20965	0.999956	F10D11.5	172634	I	F10D11.5	XLOC_002884	F10D11.5	chrI:8442719-8444925	no	no
WBGene00015112	0.444019	-0.444019	0.335487	0.999353	-0.66936	0.66936	0.0748	0.858392	B0281.5	181899	II	B0281.5a	XLOC_006480	B0281.5	chrII:2299946-2300823	no	yes
WBGene00010056	0.263998	-0.263998	0.131583	0.999353	-0.259418	0.259418	0.19055	0.999956	smc-6	174776	II	F54D5.14	XLOC_005685	smc-6	chrII:11578653-11582415	no	yes
WBGene00004125	0.350665	-0.350665	0.207624	0.999353	-0.376289	0.376289	0.1208	0.939515	mdt-30	176130	III	F44B9.7	XLOC_011252	mdt-30	chrIII:8025197-8027972	no	yes
WBGene00016314	-0.567289	0.567289	0.131983	0.999353	0.412885	-0.412885	0.18985	0.999956	C32D5.6	174046	II	C32D5.6	XLOC_007131	C32D5.6	chrII:6331944-6333934	no	no
WBGene00010606	-0.383999	0.383999	0.239124	0.999353	0.490209	-0.490209	0.10515	0.919557	cyp-13B2	187068	X	K06G5.2	XLOC_035289	cyp-13B2	chrX:14225528-14228491	no	yes
WBGene00020693	-0.546392	0.546392	0.128209	0.999353	0.416109	-0.416109	0.19725	0.999956	lron-8	181983	I	T22E7.1a	XLOC_000616	lron-8	chrI:5769022-5773457	no	yes
WBGene00004726	0.301323	-0.301323	0.172672	0.999353	-0.326038	0.326038	0.1464	0.965779	sas-4	176172	III	F10E9.8	XLOC_011298	sas-4	chrIII:8314503-8318509	no	yes
WBGene00006679	-0.670054	0.670054	0.315871	0.999353	0.8658	-0.8658	0.0799	0.870451	twk-26	180592	X	C33D12.3	XLOC_036164	twk-26	chrX:3050483-3054403	no	no
WBGene00014174	0.293018	-0.293018	0.491609	0.999353	-0.682073	0.682073	0.05145	0.809715	ZK970.8	3565809	II	ZK970.8	XLOC_005469	ZK970.8	chrII:10309576-10310008	no	no
WBGene00001496	0.258627	-0.258627	0.159277	0.999353	-0.294218	0.294218	0.16	0.984009	frm-10	179828	V	F25H9.5a	XLOC_028328	frm-10	chrV:13463263-13466931	no	yes
WBGene00011757	1.69697	-1.69697	0.0255108	0.821513	-1.63967	1.63967	1	1	cht-2	174363	II	T13H5.3	XLOC_005200	cht-2	chrII:8520878-8523386	no	yes
WBGene00012194	-0.331492	0.331492	0.113897	0.999353	0.290761	-0.290761	0.22385	0.999956	toe-4	173144	I	W02A11.3	XLOC_001643	toe-4	chrI:12738092-12740959	no	yes
WBGene00003572	-0.551739	0.551739	0.0734917	0.999353	0.266607	-0.266607	0.34645	0.999956	ncx-7	176370	III	C07A9.11	XLOC_011547	ncx-7	chrIII:9715971-9720198	no	yes
WBGene00006637	-0.515202	0.515202	0.555736	0.999353	1.49347	-1.49347	0.0458	0.780316	tsp-11	192064	X	B0563.2	XLOC_034508	tsp-11	chrX:9163106-9165645	no	no
WBGene00219803	-0.237315	0.237315	0.389161	0.999353	0.611178	-0.611178	0.0658	0.850389	C06A1.12	NA	II		XLOC_007876	C06A1.12	chrII:10574591-10574781	no	yes
WBGene00044949	0.410427	-0.410427	0.32608	0.999353	-0.648543	0.648543	0.07865	0.868786	Y49A10A.2	4927063	X	Y49A10A.2	XLOC_037379	Y49A10A.2	chrX:10371163-10372292	no	no
WBGene00022652	0.256122	-0.256122	0.462837	0.999353	-0.63467	0.63467	0.05555	0.831758	ZK84.5	191219	II	ZK84.5	XLOC_007063	ZK84.5	chrII:6016229-6016484	no	no
WBGene00007338	-0.645456	0.645456	0.311823	0.999353	0.88103	-0.88103	0.0826	0.87447	C05C12.6	182253	IV	C05C12.6	XLOC_021748	C05C12.6	chrIV:11231877-11233101	no	yes
WBGene00001112	0.292154	-0.292154	0.213001	0.999353	-0.320358	0.320358	0.12095	0.939515	duo-3	172925	I	Y106G6H.12a	XLOC_003234	duo-3	chrI:10464587-10471047	no	yes
WBGene00019829	-0.665879	0.665879	0.258992	0.999353	1.34637	-1.34637	0.09965	0.914482	R02E12.5	187526	X	R02E12.5	XLOC_033544	R02E12.5	chrX:3997359-3998487	no	no
WBGene00015936	-0.647037	0.647037	0.195099	0.999353	0.530569	-0.530569	0.1323	0.950369	C17H12.11	182757	IV	C17H12.11	XLOC_013794	C17H12.11	chrIV:6804767-6805247	no	no
WBGene00013730	0.261866	-0.261866	0.225596	0.999353	-0.367928	0.367928	0.11465	0.935496	sql-1	190949	III	Y111B2A.4a	XLOC_010093	sql-1	chrIII:12499461-12527718	no	yes
WBGene00006609	-0.488961	0.488961	0.0525078	0.999353	0.206772	-0.206772	0.4926	0.999956	tre-3	179604	V	W05E10.4b	XLOC_031525	tre-3	chrV:11709819-11715813	no	no
WBGene00008157	0.415931	-0.415931	0.216119	0.999353	-0.473813	0.473813	0.1199	0.939515	C47F8.1	173107	I	C47F8.1	XLOC_001569	C47F8.1	chrI:12335132-12336530	no	no
WBGene00003034	0.303469	-0.303469	0.127266	0.999353	-0.266569	0.266569	0.2044	0.999956	lin-49	177666	IV	F42A9.2	XLOC_014165	lin-49	chrIV:8620748-8625642	no	yes
WBGene00011717	0.332798	-0.332798	0.138854	0.999353	-0.311495	0.311495	0.1872	0.999956	T11G6.2	177977	IV	T11G6.2a	XLOC_021675	T11G6.2	chrIV:10855747-10858475	no	yes
WBGene00020377	0.738302	-0.738302	0.163608	0.999353	-0.625997	0.625997	0.15905	0.981807	T09B4.3	188315	I	T09B4.3a	XLOC_000683	T09B4.3	chrI:6176381-6178011	no	yes
WBGene00044273	1.43366	-1.43366	0.0259804	0.831629	0	0	1	1	nspa-6	3565770	V	H12D21.14	XLOC_032128	nspa-6	chrV:14889391-14889496	no	no
WBGene00020054	-0.778005	0.778005	0.26232	0.999353	0.727872	-0.727872	0.0994	0.914482	R13D7.2	179128	V	R13D7.2	XLOC_027140	R13D7.2	chrV:7409889-7411176	no	no
WBGene00011333	0.252051	-0.252051	0.151446	0.999353	-0.272653	0.272653	0.1725	0.999407	nrde-2	174589	II	T01E8.5	XLOC_007824	nrde-2	chrII:10242748-10247550	no	yes
WBGene00009252	0.53831	-0.53831	0.479931	0.999353	-1.31565	1.31565	0.05445	0.822652	F29D10.3	185119	I	F29D10.3	XLOC_002952	F29D10.3	chrI:8842544-8845588	no	yes
WBGene00019813	0.293059	-0.293059	0.189769	0.999353	-0.376294	0.376294	0.1381	0.95711	ger-1	187512	III	R01H2.5	XLOC_011093	ger-1	chrIII:7065502-7067380	no	yes
WBGene00002046	0.327242	-0.327242	0.165678	0.999353	-0.300369	0.300369	0.1587	0.981807	icln-1	177730	IV	C01F6.8a	XLOC_021343	icln-1	chrIV:9094689-9095630	no	yes
WBGene00015084	0.34267	-0.34267	0.251357	0.999353	-0.455611	0.455611	0.10485	0.919557	B0244.9	175805	III	B0244.9	XLOC_010913	B0244.9	chrIII:5730122-5730946	no	yes
WBGene00001752	-0.3664	0.3664	0.123512	0.999353	0.306876	-0.306876	0.21535	0.999956	gst-4	177886	IV	K08F4.7	XLOC_014430	gst-4	chrIV:10142217-10142985	no	yes
WBGene00020797	0.783592	-0.783592	0.225137	0.999353	-0.850735	0.850735	0.11775	0.93935	T25D3.3	188894	II	T25D3.3	XLOC_003787	T25D3.3	chrII:152701-154884	no	yes
WBGene00008529	0.367465	-0.367465	0.202006	0.999353	-0.398367	0.398367	0.1315	0.949057	F02E9.3	184094	I	F02E9.3	XLOC_002876	F02E9.3	chrI:8404540-8405949	no	yes
WBGene00011214	0.27726	-0.27726	0.152262	0.999353	-0.298798	0.298798	0.17465	0.999956	R10E9.2	175513	III	R10E9.2	XLOC_010651	R10E9.2	chrIII:3962772-3963591	no	yes
WBGene00003380	-1.09417	1.09417	0.189494	0.999353	0.924592	-0.924592	0.14035	0.95711	mnm-2	182489	X	C10A4.8	XLOC_036919	mnm-2	chrX:7422765-7424836	no	no
WBGene00004827	-0.674098	0.674098	0.105889	0.999353	0.418822	-0.418822	0.2504	0.999956	skr-21	181447	X	K08H2.1	XLOC_037807	skr-21	chrX:13226064-13226595	no	no
WBGene00011374	-0.384559	0.384559	0.193248	0.999353	0.405313	-0.405313	0.13725	0.956652	T02D1.8	259608	IV	T02D1.8	XLOC_026046	T02D1.8	chrIV:17386841-17387412	no	no
WBGene00017148	1.06309	-1.06309	0.0501828	0.999353	-0.984661	0.984661	0.52775	0.999956	EGAP2.2	184048	II	EGAP2.2	XLOC_004564	EGAP2.2	chrII:5230067-5230488	no	no
WBGene00003979	-0.386707	0.386707	0.161862	0.999353	0.352839	-0.352839	0.1641	0.989302	pes-5	174819	II	T27D12.4a	XLOC_008077	pes-5	chrII:11827979-11829957	no	no
WBGene00016844	0.233004	-0.233004	0.155778	0.999353	-0.2685	0.2685	0.17135	0.998178	sucg-1	177555	IV	C50F7.4	XLOC_014010	sucg-1	chrIV:7728907-7730459	no	no
WBGene00008260	-0.710754	0.710754	0.0532655	0.999353	0.667905	-0.667905	0.50185	0.999956	C52G5.2	181420	X	C52G5.2	XLOC_035078	C52G5.2	chrX:12705552-12872405	no	no
WBGene00010386	-0.545984	0.545984	0.254828	0.999353	0.949039	-0.949039	0.10515	0.919557	H12D21.10	179990	V	H12D21.10a	XLOC_028589	H12D21.10	chrV:14899870-14911818	no	no
WBGene00007386	0.29615	-0.29615	0.130745	0.999353	-0.273516	0.273516	0.20535	0.999956	C06H2.2	179542	V	C06H2.2	XLOC_027827	C06H2.2	chrV:11125245-11126862	no	yes
WBGene00016425	-1.03453	1.03453	0.0585105	0.999353	1.08712	-1.08712	0.45995	0.999956	C34H4.2	183220	IV	C34H4.2	XLOC_012171	C34H4.2	chrIV:858931-1921342	no	no
WBGene00009385	0.22665	-0.22665	0.211783	0.999353	-0.337668	0.337668	0.12755	0.944937	sas-5	179592	V	F35B12.5a	XLOC_027966	sas-5	chrV:11610760-11612457	no	yes
WBGene00004962	0.632299	-0.632299	0.209952	0.999353	-0.573492	0.573492	0.12845	0.944937	spe-8	171606	I	F53G12.6	XLOC_000017	spe-8	chrI:118108-120870	no	yes
WBGene00020348	-0.286269	0.286269	0.105263	0.999353	0.233715	-0.233715	0.2566	0.999956	mrpl-23	188274	I	T08B2.8	XLOC_002570	mrpl-23	chrI:6211363-6211886	no	yes
WBGene00012923	-1.10739	1.10739	0.0693029	0.999353	1.23936	-1.23936	0.3898	0.999956	fbxa-128	189975	III	Y47D3A.2	XLOC_011741	fbxa-128	chrIII:10732173-12052193	no	yes
WBGene00001915	0.540561	-0.540561	0.037177	0.932056	-0.0988567	0.0988567	0.7318	0.999956	his-41	179340	V	C50F4.5	XLOC_027528	his-41	chrV:9545554-9546140	no	yes
WBGene00014111	0.324018	-0.324018	0.218215	0.999353	-0.33452	0.33452	0.12475	0.944937	rpc-25	179418	V	ZK856.10	XLOC_031127	rpc-25	chrV:10205757-10206575	no	yes
WBGene00010001	-0.673718	0.673718	0.169081	0.999353	0.469953	-0.469953	0.1614	0.985314	F53F8.4	186181	V	F53F8.4	XLOC_032966	F53F8.4	chrV:20690744-20691653	no	yes
WBGene00017837	0.273458	-0.273458	0.177622	0.999353	-0.284779	0.284779	0.1526	0.974587	F26G1.1	173826	II	F26G1.1	XLOC_004481	F26G1.1	chrII:4790310-4795505	no	yes
WBGene00007001	0.27223	-0.27223	0.140534	0.999353	-0.276126	0.276126	0.19405	0.999956	tufm-2	172024	I	C43E11.4	XLOC_000428	tufm-2	chrI:4247761-4249261	no	yes
WBGene00008784	0.798712	-0.798712	0.268069	0.999353	-0.911715	0.911715	0.10145	0.91622	F14B6.3	173104	I	F14B6.3	XLOC_001545	F14B6.3	chrI:12230571-12232243	no	yes
WBGene00001613	1.49125	-1.49125	0.0272121	0.831629	-1.89251	1.89251	1	1	glr-2	175999	III	B0280.12a	XLOC_011111	glr-2	chrIII:7138620-7144770	no	yes
WBGene00020006	0.472801	-0.472801	0.211491	0.999353	-0.487886	0.487886	0.1288	0.944937	set-15	187813	IV	R11E3.4	XLOC_019625	set-15	chrIV:4776824-4780075	no	no
WBGene00001650	-0.362786	0.362786	0.203371	0.999353	0.358787	-0.358787	0.1341	0.956652	gon-1	177850	IV	F25H8.3a	XLOC_021510	gon-1	chrIV:9935045-9953408	no	no
WBGene00016752	0.453414	-0.453414	0.0270828	0.831629	1.67	-1.67	1	1	C48E7.7	172316	I	C48E7.7	XLOC_000697	C48E7.7	chrI:6234786-6235290	no	no
WBGene00001949	0.344613	-0.344613	0.247134	0.999353	-0.476675	0.476675	0.10965	0.931285	hlh-2	172458	I	M05B5.5a	XLOC_002723	hlh-2	chrI:7191237-7193905	no	no
WBGene00022054	0.274829	-0.274829	0.239909	0.999353	-0.387455	0.387455	0.11395	0.933445	Y67D2.4	175306	III	Y67D2.4a	XLOC_008619	Y67D2.4	chrIII:1533884-1538120	no	yes
WBGene00000516	-0.494202	0.494202	0.245521	0.999353	0.635339	-0.635339	0.1114	0.931285	cki-1	174260	II	T05A6.1	XLOC_005076	cki-1	chrII:7811207-7811819	no	no
WBGene00019546	-0.683755	0.683755	0.0488356	0.999353	0.759467	-0.759467	0.56115	0.999956	glct-6	4363062	IV	W07G9.2a	XLOC_012418	glct-6	chrIV:1956724-4526957	no	no
WBGene00015133	0.295498	-0.295498	0.287889	0.999353	-0.372541	0.372541	0.0952	0.901565	mrpl-11	181917	III	B0303.15	XLOC_009611	mrpl-11	chrIII:8717565-8718389	no	no
WBGene00014226	0.300483	-0.300483	0.316857	0.999353	-0.459343	0.459343	0.0867	0.881475	ZK1098.11	3565174	III	ZK1098.11	XLOC_009728	ZK1098.11	chrIII:9556515-9557290	no	yes
WBGene00019240	-0.252976	0.252976	0.10304	0.999353	0.221783	-0.221783	0.26665	0.999956	H24K24.3	178597	V	H24K24.3a	XLOC_026208	H24K24.3	chrV:911808-916148	no	no
WBGene00000977	-0.486019	0.486019	0.34194	0.999353	0.535571	-0.535571	0.0804	0.870451	dhs-14	178738	V	R05D8.8	XLOC_029801	dhs-14	chrV:2764016-2765192	no	no
WBGene00007957	-0.664542	0.664542	0.269972	0.999353	0.997472	-0.997472	0.1021	0.91622	C35C5.8	181342	X	C35C5.8a	XLOC_034856	C35C5.8	chrX:11534170-11536301	no	no
WBGene00010284	0.257053	-0.257053	0.133538	0.999353	-0.253019	0.253019	0.2068	0.999956	aman-2	179632	V	F58H1.1	XLOC_031563	aman-2	chrV:11927812-11933208	no	yes
WBGene00010892	0.232548	-0.232548	0.126446	0.999353	-0.240771	0.240771	0.21895	0.999956	dhhc-6	178158	IV	M18.8	XLOC_014797	dhhc-6	chrIV:12124929-12126604	no	yes
WBGene00010193	-0.26513	0.26513	0.120232	0.999353	0.254178	-0.254178	0.2304	0.999956	btb-20	186442	II	F57C2.1	XLOC_008399	btb-20	chrII:14522387-14523431	no	yes
WBGene00018150	0.247824	-0.247824	0.172719	0.999353	-0.319107	0.319107	0.16035	0.984009	epg-4	176009	III	F37C12.2	XLOC_009377	epg-4	chrIII:7182243-7183754	no	yes
WBGene00022155	-0.394	0.394	0.188415	0.999353	0.403369	-0.403369	0.1468	0.965779	Y71G12B.17	171730	I	Y71G12B.17	XLOC_000142	Y71G12B.17	chrI:1667729-1669752	no	no
WBGene00020116	0.648143	-0.648143	0.0449657	0.999353	-0.662422	0.662422	0.61895	0.999956	moa-1	175340	III	R155.2	XLOC_010457	moa-1	chrIII:1545026-2217085	no	yes
WBGene00007543	-1.07069	1.07069	0.0618159	0.999353	0.581036	-0.581036	0.4507	0.999956	fipr-7	259643	V	C12D8.16	XLOC_027646	fipr-7	chrV:10229816-10230085	no	no
WBGene00008141	0.720622	-0.720622	0.199887	0.999353	-0.672887	0.672887	0.13975	0.95711	C47E8.1	183550	V	C47E8.1	XLOC_028553	C47E8.1	chrV:14666087-14667090	no	yes
WBGene00008547	-0.407743	0.407743	0.17157	0.999353	0.362461	-0.362461	0.16285	0.987473	F07A11.4	174780	II	F07A11.4a	XLOC_005691	F07A11.4	chrII:11603890-11611240	no	no
WBGene00017546	0.235181	-0.235181	0.127164	0.999353	-0.242118	0.242118	0.21995	0.999956	rpa-1	174238	II	F18A1.5	XLOC_005047	rpa-1	chrII:7664541-7666883	no	yes
WBGene00020093	-0.267936	0.267936	0.122352	0.999353	0.252109	-0.252109	0.22895	0.999956	R144.3	187900	III	R144.3a	XLOC_009053	R144.3	chrIII:5022010-5023071	no	yes
WBGene00002255	-0.326229	0.326229	0.343655	0.999353	0.54712	-0.54712	0.0816	0.870451	lbp-3	180615	X	F40F4.4a	XLOC_033412	lbp-3	chrX:3257393-3258051	no	no
WBGene00010546	-0.277916	0.277916	0.137793	0.999353	0.276237	-0.276237	0.20375	0.999956	K03H1.11	186961	III	K03H1.11	XLOC_011590	K03H1.11	chrIII:9950823-9951875	no	yes
WBGene00017563	-0.459255	0.459255	0.137203	0.999353	0.365284	-0.365284	0.2053	0.999956	F18C5.10	174082	II	F18C5.10	XLOC_007182	F18C5.10	chrII:6559725-6561411	no	yes
WBGene00015929	0.368309	-0.368309	0.125324	0.999353	-0.307754	0.307754	0.22525	0.999956	C17H12.3	177443	IV	C17H12.3	XLOC_020895	C17H12.3	chrIV:6793948-6795168	no	yes
WBGene00011970	0.348124	-0.348124	0.140783	0.999353	-0.286164	0.286164	0.2004	0.999956	rlbp-1	172530	I	T23G11.5a	XLOC_000910	rlbp-1	chrI:7683345-7693699	no	yes
WBGene00007850	-0.391904	0.391904	0.133077	0.999353	0.335084	-0.335084	0.2136	0.999956	C31G12.1	183090	V	C31G12.1	XLOC_029153	C31G12.1	chrV:18179972-18181261	no	no
WBGene00013253	0.422852	-0.422852	0.0360125	0.925821	-0.450028	0.450028	0.7903	0.999956	Y57A10A.8	190336	II	Y57A10A.8	XLOC_005769	Y57A10A.8	chrII:11948521-12404254	no	no
WBGene00020350	0.488892	-0.488892	0.0284465	0.850583	-1.91683	1.91683	1	1	T08B2.12	172315	I	T08B2.12	XLOC_002575	T08B2.12	chrI:6231550-6232054	no	no
WBGene00016151	0.252755	-0.252755	0.171493	0.999353	-0.27543	0.27543	0.1661	0.994787	smc-5	173874	II	C27A2.1	XLOC_004533	smc-5	chrII:5062128-5066962	no	yes
WBGene00001042	-0.549599	0.549599	0.199975	0.999353	0.555907	-0.555907	0.14275	0.959842	dnj-24	175745	III	W03A5.7	XLOC_010872	dnj-24	chrIII:5416095-5419526	no	yes
WBGene00012407	-0.345454	0.345454	0.221629	0.999353	0.376787	-0.376787	0.12905	0.946178	Y7A5A.1	181666	X	Y7A5A.1	XLOC_038221	Y7A5A.1	chrX:15767452-15771423	no	yes
WBGene00016006	-0.268733	0.268733	0.168968	0.999353	0.317288	-0.317288	0.1693	0.995294	fln-2	181168	X	C23F12.1a	XLOC_034533	fln-2	chrX:9397692-9426624	no	no
WBGene00008929	-0.529273	0.529273	0.419552	0.999353	0.993736	-0.993736	0.0684	0.855466	F18A11.2	174945	II	F18A11.2	XLOC_005886	F18A11.2	chrII:13032782-13036353	no	yes
WBGene00008344	0.267869	-0.267869	0.144583	0.999353	-0.272158	0.272158	0.1992	0.999956	C56A3.5	183857	V	C56A3.5	XLOC_028334	C56A3.5	chrV:13551958-13553282	no	yes
WBGene00001830	0.238428	-0.238428	0.148219	0.999353	-0.25669	0.25669	0.1947	0.999956	hcp-2	179353	V	T06E4.1	XLOC_027548	hcp-2	chrV:9645857-9650080	no	yes
WBGene00018282	-0.630237	0.630237	0.159903	0.999353	0.503951	-0.503951	0.18035	0.999956	F41D9.2	185612	X	F41D9.2a	XLOC_037100	F41D9.2	chrX:8382835-8384746	no	yes
WBGene00016540	0.607503	-0.607503	0.0413966	0.971776	-0.585021	0.585021	0.70485	0.999956	C39F7.5	178621	V	C39F7.5	XLOC_026242	C39F7.5	chrV:998446-1689685	no	yes
WBGene00004062	-0.291545	0.291545	0.153527	0.999353	0.269461	-0.269461	0.1905	0.999956	pmp-5	179056	V	T10H9.5a	XLOC_030466	pmp-5	chrV:6662241-6665791	no	yes
WBGene00010631	0.233378	-0.233378	0.125472	0.999353	-0.235697	0.235697	0.23315	0.999956	cash-1	179445	V	K07C5.8	XLOC_027670	cash-1	chrV:10362301-10365156	no	yes
WBGene00003011	0.326404	-0.326404	0.151038	0.999353	-0.311581	0.311581	0.1937	0.999956	lin-25	179732	V	F56H9.5	XLOC_028193	lin-25	chrV:12649939-12658606	no	yes
WBGene00004337	0.263618	-0.263618	0.180426	0.999353	-0.280467	0.280467	0.16185	0.985797	rfc-1	179967	V	C54G10.2a	XLOC_032088	rfc-1	chrV:14642788-14645730	no	yes
WBGene00008974	-0.310339	0.310339	0.106362	0.999353	0.24837	-0.24837	0.2739	0.999956	tbc-1	181592	X	F20D1.2	XLOC_035417	tbc-1	chrX:14970689-14974462	no	yes
WBGene00016274	0.29825	-0.29825	0.226163	0.999353	-0.3267	0.3267	0.1288	0.944937	C30G12.2	174195	II	C30G12.2	XLOC_004981	C30G12.2	chrII:7290417-7291678	no	yes
WBGene00012907	-0.240477	0.240477	0.129273	0.999353	0.241538	-0.241538	0.22485	0.999956	cpt-1	174912	II	Y46G5A.17	XLOC_008201	cpt-1	chrII:12788525-12796271	no	yes
WBGene00022027	0.330721	-0.330721	0.187003	0.999353	-0.318991	0.318991	0.15615	0.976268	vps-20	171654	I	Y65B4A.3	XLOC_000060	vps-20	chrI:636938-637810	no	yes
WBGene00022791	-0.0289893	0.0289893	0.865015	0.999353	0.69908	-0.69908	0.03345	0.709092	ZK686.1	191404	III	ZK686.1	XLOC_009450	ZK686.1	chrIII:7773419-7773598	no	yes
WBGene00010256	-0.520165	0.520165	0.373455	0.999353	1.08858	-1.08858	0.07785	0.866842	hrg-3	179369	V	F58E6.7	XLOC_027572	hrg-3	chrV:9756524-9756839	no	no
WBGene00018682	-0.349469	0.349469	0.155484	0.999353	0.335796	-0.335796	0.1876	0.999956	aagr-4	180400	X	F52D1.1	XLOC_033038	aagr-4	chrX:460654-466784	no	no
WBGene00016414	0.354544	-0.354544	0.278289	0.999353	-0.493296	0.493296	0.10485	0.919557	C34F11.2	183217	II	C34F11.2	XLOC_004557	C34F11.2	chrII:5212281-5212726	no	no
WBGene00009243	-0.461079	0.461079	0.28719	0.999353	0.502783	-0.502783	0.1015	0.91622	F29C6.1	172947	I	F29C6.1a	XLOC_001337	F29C6.1	chrI:10579407-10580690	no	no
WBGene00019260	0.555447	-0.555447	0.199519	0.999353	-0.48207	0.48207	0.14655	0.965779	H34I24.1	175402	III	H34I24.1	XLOC_008752	H34I24.1	chrIII:2847052-2848545	no	no
WBGene00001993	-0.328238	0.328238	0.218867	0.999353	0.308799	-0.308799	0.13225	0.950369	hpd-1	176473	III	T21C12.2	XLOC_009877	hpd-1	chrIII:10535449-10537405	no	no
WBGene00009241	-0.586263	0.586263	0.199444	0.999353	0.504619	-0.504619	0.1472	0.967208	F28H7.8	185099	V	F28H7.8	XLOC_027751	F28H7.8	chrV:10758939-10760549	no	no
WBGene00013295	-0.824704	0.824704	0.0918865	0.999353	0.417078	-0.417078	0.31945	0.999956	Y57G11B.2	190366	IV	Y57G11B.2a	XLOC_016053	Y57G11B.2	chrIV:14565333-14567084	no	no
WBGene00044989	-0.351975	0.351975	0.200602	0.999353	0.338205	-0.338205	0.1469	0.965779	Y37A1B.17	4926960	IV	Y37A1B.17a	XLOC_022484	Y37A1B.17	chrIV:13964819-13979814	no	no
WBGene00000964	-0.554509	0.554509	0.22533	0.999353	0.504499	-0.504499	0.13155	0.949057	dhp-2	177852	IV	C47E12.8	XLOC_014399	dhp-2	chrIV:9978164-9980688	no	yes
WBGene00018779	-0.428446	0.428446	0.281127	0.999353	0.556923	-0.556923	0.1054	0.919557	F53H8.3	186195	X	F53H8.3	XLOC_033083	F53H8.3	chrX:938592-942545	no	no
WBGene00011589	0.260799	-0.260799	0.176854	0.999353	-0.299158	0.299158	0.1678	0.995087	T07F10.3	179765	V	T07F10.3	XLOC_031780	T07F10.3	chrV:12868278-12870016	no	yes
WBGene00006473	0.258468	-0.258468	0.185457	0.999353	-0.29876	0.29876	0.1602	0.984009	tag-124	174509	II	E02H1.3	XLOC_005378	tag-124	chrII:9591345-9592794	no	yes
WBGene00010757	0.476855	-0.476855	0.152033	0.999353	-0.388211	0.388211	0.1959	0.999956	pad-2	259529	III	K10G9.3a	XLOC_009843	pad-2	chrIII:10279037-10281251	no	no
WBGene00195093	0.314256	-0.314256	0.138793	0.999353	-0.284452	0.284452	0.21485	0.999956	Y59E9AL.36	13193758	IV	Y59E9AL.36	XLOC_019936	Y59E9AL.36	chrIV:5207263-5209463	no	yes
WBGene00001562	-0.33352	0.33352	0.185842	0.999353	0.346307	-0.346307	0.1606	0.984009	lin-66	178354	IV	B0513.1a	XLOC_015309	lin-66	chrIV:13888185-13892333	no	yes
WBGene00009830	-0.618734	0.618734	0.241996	0.999353	0.581996	-0.581996	0.1236	0.944434	cutl-18	179565	V	F47G9.3	XLOC_031412	cutl-18	chrV:11313438-11316862	no	yes
WBGene00013053	0.972827	-0.972827	0.210364	0.999353	-0.794574	0.794574	0.1422	0.959842	Y50E8A.10	179977	V	Y50E8A.10	XLOC_028573	Y50E8A.10	chrV:14780065-14781063	no	yes
WBGene00019846	-0.464373	0.464373	0.363834	0.999353	0.66902	-0.66902	0.08225	0.873663	gpx-7	187542	X	R03G5.5a	XLOC_037004	gpx-7	chrX:7798987-7799729	no	no
WBGene00020850	-1.42396	1.42396	0.0877318	0.999353	1.38463	-1.38463	0.3414	0.999956	nhr-226	188975	V	T27B7.3	XLOC_026384	nhr-226	chrV:1743375-2713617	no	no
WBGene00004902	-0.38125	0.38125	0.167474	0.999353	0.332244	-0.332244	0.17985	0.999956	snf-3	173493	II	T13B5.1	XLOC_003923	snf-3	chrII:1092016-1097558	no	yes
WBGene00008800	0.277517	-0.277517	0.171837	0.999353	-0.272295	0.272295	0.17515	0.999956	F14E5.2	174342	II	F14E5.2a	XLOC_007500	F14E5.2	chrII:8424243-8428787	no	yes
WBGene00003061	0.253457	-0.253457	0.233235	0.999353	-0.309148	0.309148	0.1295	0.946623	lpd-5	172037	I	ZK973.10	XLOC_002287	lpd-5	chrI:4372340-4373019	no	yes
WBGene00018833	0.294215	-0.294215	0.179095	0.999353	-0.330789	0.330789	0.1687	0.995294	ztf-1	176236	III	F54F2.5a	XLOC_011390	ztf-1	chrIII:8787184-8792257	no	yes
WBGene00001877	0.482011	-0.482011	0.0607934	0.999353	-0.503503	0.503503	0.49705	0.999956	his-3	180073	V	T10C6.12	XLOC_028801	his-3	chrV:15699960-16443388	no	no
WBGene00022821	-0.712078	0.712078	0.231559	0.999353	0.69028	-0.69028	0.13035	0.946816	ZK813.2	191428	X	ZK813.2	XLOC_033450	ZK813.2	chrX:3443812-3444178	no	no
WBGene00008939	0.467414	-0.467414	0.176143	0.999353	-0.42555	0.42555	0.1711	0.998092	F18H3.1	184659	X	F18H3.1	XLOC_035178	F18H3.1	chrX:13519592-13521330	no	no
WBGene00021834	-0.638158	0.638158	0.0514176	0.999353	0.782365	-0.782365	0.5877	0.999956	mab-31	171898	I	Y54E10A.16	XLOC_002150	mab-31	chrI:3233392-3600680	no	no
WBGene00007613	0.486978	-0.486978	0.26915	0.999353	-0.635398	0.635398	0.1128	0.931285	C15H11.1	182646	V	C15H11.1	XLOC_028507	C15H11.1	chrV:14393842-14394429	no	no
WBGene00003990	-0.335868	0.335868	0.0922132	0.999353	0.244061	-0.244061	0.32925	0.999956	pfn-2	180808	X	F35C8.6	XLOC_036536	pfn-2	chrX:5353494-5354022	no	no
WBGene00043743	0.271155	-0.271155	0.129724	0.999353	-0.309517	0.309517	0.23485	0.999956	Y59E9AL.2	3565611	IV	Y59E9AL.2	XLOC_012842	Y59E9AL.2	chrIV:5226882-5228180	no	no
WBGene00013654	-0.48985	0.48985	0.0473362	0.999353	0.465593	-0.465593	0.6436	0.999956	Y105C5B.15	178448	IV	Y105C5B.15a	XLOC_017810	Y105C5B.15	chrIV:15896213-16675918	no	no
WBGene00220002	0.498628	-0.498628	0.054787	0.999353	-0.830127	0.830127	0.5558	0.999956	K02F6.11	NA	II		XLOC_006516	K02F6.11	chrII:2443296-4279128	no	no
WBGene00077762	-0.399261	0.399261	0.345036	0.999353	0.639526	-0.639526	0.08845	0.889202	Y57G11C.499	7040135	IV	Y57G11C.499	XLOC_023424	Y57G11C.499	chrIV:14754056-14754902	no	no
WBGene00006724	0.227145	-0.227145	0.146465	0.999353	-0.249816	0.249816	0.2089	0.999956	ubh-4	174289	II	C08B11.7	XLOC_007447	ubh-4	chrII:8038327-8039379	no	yes
WBGene00044294	-0.432193	0.432193	0.160086	0.999353	0.377981	-0.377981	0.19135	0.999956	C01B10.11	3565843	IV	C01B10.11	XLOC_013768	C01B10.11	chrIV:6657986-6660233	no	yes
WBGene00004259	-0.311364	0.311364	0.248084	0.999353	0.31149	-0.31149	0.12365	0.944434	pyr-1	174385	II	D2085.1	XLOC_005231	pyr-1	chrII:8651083-8658367	no	no
WBGene00001000	-0.321914	0.321914	0.146581	0.999353	0.272308	-0.272308	0.2095	0.999956	dim-1	181062	X	C18A11.7a	XLOC_037042	dim-1	chrX:8050968-8058162	no	no
WBGene00011218	0.310525	-0.310525	0.165505	0.999353	-0.319958	0.319958	0.1859	0.999956	R10E11.6	3565637	III	R10E11.6a	XLOC_009758	R10E11.6	chrIII:9783241-9785721	no	yes
WBGene00007958	-1.13842	1.13842	0.149427	0.999353	2.35086	-2.35086	0.2061	0.999956	C35C5.9	183231	X	C35C5.9	XLOC_034857	C35C5.9	chrX:11536728-11536941	no	no
WBGene00008666	0.467261	-0.467261	0.193769	0.999353	-0.440355	0.440355	0.15935	0.981807	F10G8.8	172870	I	F10G8.8a	XLOC_003181	F10G8.8	chrI:10050936-10061977	no	yes
WBGene00012452	-0.459349	0.459349	0.165641	0.999353	0.413017	-0.413017	0.18645	0.999956	Y17D7B.4	189448	V	Y17D7B.4	XLOC_032746	Y17D7B.4	chrV:18776209-18776659	no	no
WBGene00015476	-0.320716	0.320716	0.490806	0.999353	0.942302	-0.942302	0.0629	0.846661	C05D9.9	180466	X	C05D9.9a	XLOC_035899	C05D9.9	chrX:1122609-1124146	no	no
WBGene00010282	0.948218	-0.948218	0.198659	0.999353	-1.73817	1.73817	0.15625	0.976268	F58G11.4	186546	V	F58G11.4a	XLOC_028360	F58G11.4	chrV:13672589-13675903	no	yes
WBGene00006450	0.260552	-0.260552	0.161395	0.999353	-0.281108	0.281108	0.1917	0.999956	tag-77	177656	IV	C28C12.10a	XLOC_021259	tag-77	chrIV:8503660-8510458	no	yes
WBGene00020796	0.259916	-0.259916	0.191652	0.999353	-0.295168	0.295168	0.1617	0.985604	mrpl-28	173400	II	T25D3.2	XLOC_006149	mrpl-28	chrII:154934-156007	no	yes
WBGene00045053	0.676671	-0.676671	0.137683	0.999353	-1.47919	1.47919	0.2256	0.999956	K12C11.7	4926895	I	K12C11.7a	XLOC_000118	K12C11.7	chrI:942259-1655335	no	yes
WBGene00003690	0.327858	-0.327858	0.297812	0.999353	-0.482168	0.482168	0.10415	0.919557	nhr-100	177806	IV	C28D4.1	XLOC_014348	nhr-100	chrIV:9728665-9730996	no	no
WBGene00018235	0.720257	-0.720257	0.0595753	0.999353	-0.8155	0.8155	0.52065	0.999956	F40E12.2	185537	II	F40E12.2	XLOC_004307	F40E12.2	chrII:2443296-4279128	no	no
WBGene00012781	0.45227	-0.45227	0.0469672	0.999353	-0.124179	0.124179	0.66225	0.999956	nspd-7	177910	IV	Y43C5A.1	XLOC_021582	nspd-7	chrIV:10268952-10269165	no	yes
WBGene00009215	-0.372254	0.372254	0.245393	0.999353	0.402667	-0.402667	0.1269	0.944937	thn-2	178187	IV	F28D1.5	XLOC_014842	thn-2	chrIV:12383147-12383896	no	no
WBGene00009010	0.325351	-0.325351	0.183957	0.999353	-0.369019	0.369019	0.16965	0.995294	F21D5.5	177681	IV	F21D5.5	XLOC_021284	F21D5.5	chrIV:8735786-8739361	no	yes
WBGene00012121	0.279717	-0.279717	0.172321	0.999353	-0.289375	0.289375	0.1815	0.999956	T28C6.7	177697	IV	T28C6.7a	XLOC_014190	T28C6.7	chrIV:8827790-8840248	no	no
WBGene00011856	-0.318033	0.318033	0.210122	0.999353	0.325618	-0.325618	0.14875	0.969021	T20D3.2	177760	IV	T20D3.2	XLOC_021383	T20D3.2	chrIV:9329095-9330835	no	no
WBGene00010745	-0.653593	0.653593	0.0481902	0.999353	0.658403	-0.658403	0.65075	0.999956	dod-17	187266	IV	K10D11.1	XLOC_014942	dod-17	chrIV:12849497-13146871	no	no
WBGene00000071	-0.340901	0.340901	0.306037	0.999353	0.476295	-0.476295	0.10275	0.916298	acy-4	178949	V	T01C2.1	XLOC_030274	acy-4	chrV:5624919-5630862	no	yes
WBGene00019261	-0.306639	0.306639	0.159491	0.999353	0.296966	-0.296966	0.1973	0.999956	H34I24.2	175401	III	H34I24.2	XLOC_008751	H34I24.2	chrIII:2842162-2845065	no	no
WBGene00008372	-0.531868	0.531868	0.389614	0.999353	0.809231	-0.809231	0.0809	0.870451	D1054.5	183914	V	D1054.5	XLOC_031272	D1054.5	chrV:10772832-10776558	no	yes
WBGene00004859	-0.708271	0.708271	0.207199	0.999353	0.530563	-0.530563	0.15205	0.974587	sma-5	181373	X	W06B3.2a	XLOC_037636	sma-5	chrX:11997892-12004936	no	yes
WBGene00012547	0.55548	-0.55548	0.052111	0.999353	-0.649231	0.649231	0.60535	0.999956	Y37D8A.5	189613	III	Y37D8A.5	XLOC_011893	Y37D8A.5	chrIII:12784715-13607695	no	no
WBGene00044049	0.476781	-0.476781	0.194542	0.999353	-0.460388	0.460388	0.1624	0.986277	sfxn-5	174303	II	C41C4.10a	XLOC_007454	sfxn-5	chrII:8102214-8104999	no	yes
WBGene00014029	0.40947	-0.40947	0.21705	0.999353	-0.516813	0.516813	0.14565	0.965049	ZK637.12	176262	III	ZK637.12	XLOC_009638	ZK637.12	chrIII:8924212-8925178	no	yes
WBGene00001974	0.234912	-0.234912	0.161145	0.999353	-0.253734	0.253734	0.19685	0.999956	hmg-4	176052	III	T20B12.8	XLOC_011160	hmg-4	chrIII:7379215-7381530	no	yes
WBGene00010082	0.29785	-0.29785	0.322428	0.999353	-0.44814	0.44814	0.0994	0.914482	F55A11.11	3565838	V	F55A11.11	XLOC_028008	F55A11.11	chrV:11783410-11784544	no	yes
WBGene00007058	-0.286816	0.286816	0.380962	0.999353	0.530003	-0.530003	0.0838	0.878693	dmd-6	178392	IV	F13G11.1b	XLOC_016153	dmd-6	chrIV:14619426-14623589	no	yes
WBGene00015291	-0.290779	0.290779	0.201873	0.999353	0.315189	-0.315189	0.15765	0.977714	C01B12.8	3565099	II	C01B12.8	XLOC_003767	C01B12.8	chrII:24770-25381	no	yes
WBGene00017737	0.553402	-0.553402	0.051302	0.999353	-0.664196	0.664196	0.62105	0.999956	F23C8.8	171802	I	F23C8.8	XLOC_002058	F23C8.8	chrI:2256153-2485384	no	yes
WBGene00015175	0.339098	-0.339098	0.395834	0.999353	-0.756115	0.756115	0.0807	0.870451	srz-4	181982	I	B0414.1	XLOC_000619	srz-4	chrI:5801874-5803269	no	yes
WBGene00044251	0.31789	-0.31789	0.39346	0.999353	-0.580482	0.580482	0.0815	0.870451	F59C6.12	3565901	I	F59C6.12	XLOC_001319	F59C6.12	chrI:10520859-10521953	no	yes
WBGene00022598	0.274524	-0.274524	0.204557	0.999353	-0.28892	0.28892	0.1564	0.976268	ztf-8	175726	III	ZC395.8	XLOC_010855	ztf-8	chrIII:5268959-5273430	no	yes
WBGene00010093	0.233787	-0.233787	0.15614	0.999353	-0.248974	0.248974	0.20375	0.999956	capg-2	179684	V	F55C5.4	XLOC_028111	capg-2	chrV:12271864-12275489	no	no
WBGene00010803	-0.732428	0.732428	0.189299	0.999353	0.662809	-0.662809	0.1685	0.995294	M01B2.10	187361	V	M01B2.10	XLOC_032191	M01B2.10	chrV:15260966-15262206	no	no
WBGene00006052	0.269951	-0.269951	0.183384	0.999353	-0.310594	0.310594	0.1738	0.999956	ssq-3	191964	IV	ZC477.1	XLOC_013895	ssq-3	chrIV:7111620-7112831	no	no
WBGene00023021	-0.429559	0.429559	0.371316	0.999353	0.587118	-0.587118	0.0862	0.880211	F32A5.9	NA	II		XLOC_004978	F32A5.9	chrII:7258347-7258788	no	no
WBGene00002230	0.588987	-0.588987	0.0463222	0.999353	-0.610996	0.610996	0.69205	0.999956	klp-20	3565057	III	Y50D7A.6	XLOC_008493	klp-20	chrIII:56859-463717	no	no
WBGene00009943	-0.507423	0.507423	0.298981	0.999353	0.567982	-0.567982	0.1074	0.925347	F52G2.3	178324	IV	F52G2.3	XLOC_022117	F52G2.3	chrIV:13543423-13548198	no	yes
WBGene00050917	1.19573	-1.19573	0.0722021	0.999353	-1.94118	1.94118	0.4458	0.999956	Y53G8AL.4	6418663	III	Y53G8AL.4a	XLOC_010562	Y53G8AL.4	chrIII:3200941-3648757	no	yes
WBGene00011368	0.264637	-0.264637	0.15938	0.999353	-0.269418	0.269418	0.20195	0.999956	tftc-5	175520	III	T02C12.3	XLOC_008879	tftc-5	chrIII:4022147-4025541	no	yes
WBGene00003725	-0.891871	0.891871	0.0604089	0.999353	0.931002	-0.931002	0.53245	0.999956	nhr-135	189066	V	VC5.5	XLOC_030565	nhr-135	chrV:7038543-7095917	no	no
WBGene00015063	0.544521	-0.544521	0.201903	0.999353	-0.50836	0.50836	0.15955	0.982214	B0228.6	174251	II	B0228.6	XLOC_007394	B0228.6	chrII:7754093-7755104	no	no
WBGene00015466	0.245229	-0.245229	0.249071	0.999353	-0.363384	0.363384	0.1299	0.946623	hyls-1	179118	V	C05C8.9a	XLOC_027111	hyls-1	chrV:7237539-7239541	no	yes
WBGene00009092	-0.253011	0.253011	0.10151	0.999353	0.198004	-0.198004	0.31865	0.999956	tomm-20	179691	V	F23H12.2	XLOC_031660	tomm-20	chrV:12342461-12343448	no	yes
WBGene00007308	0.249172	-0.249172	0.176661	0.999353	-0.262995	0.262995	0.1828	0.999956	C04G2.9	177878	IV	C04G2.9	XLOC_014424	C04G2.9	chrIV:10112907-10114119	no	yes
WBGene00019232	-0.418443	0.418443	0.21875	0.999353	0.386932	-0.386932	0.1479	0.968244	ugt-13	186766	V	H23N18.1	XLOC_026721	ugt-13	chrV:4908872-4911365	no	no
WBGene00077500	0.322764	-0.322764	0.24983	0.999353	-0.348755	0.348755	0.13	0.946623	C27H6.9	6418702	V	C27H6.9	XLOC_027608	C27H6.9	chrV:9982855-9983861	no	yes
WBGene00007812	-0.291697	0.291697	0.163272	0.999353	0.278448	-0.278448	0.19925	0.999956	C29F7.3	181464	X	C29F7.3	XLOC_037841	C29F7.3	chrX:13418961-13419828	no	yes
WBGene00016182	0.277865	-0.277865	0.240785	0.999353	-0.304198	0.304198	0.13505	0.956652	C28C12.12	177653	IV	C28C12.12	XLOC_021257	C28C12.12	chrIV:8494784-8496346	no	yes
WBGene00003709	-0.512206	0.512206	0.0521882	0.999353	0.655971	-0.655971	0.6215	0.999956	nhr-119	187340	II	K12H6.1	XLOC_006558	nhr-119	chrII:2443296-4279128	no	yes
WBGene00004953	0.23527	-0.23527	0.152958	0.999353	-0.245326	0.245326	0.2126	0.999956	spd-2	172712	I	F32H2.3	XLOC_002970	spd-2	chrI:8967087-8970064	no	yes
WBGene00007947	-0.388353	0.388353	0.203468	0.999353	0.348498	-0.348498	0.1602	0.984009	C35A5.3	179465	V	C35A5.3	XLOC_031203	C35A5.3	chrV:10499462-10501372	no	no
WBGene00016836	0.293473	-0.293473	0.152783	0.999353	-0.27232	0.27232	0.2137	0.999956	C50F2.2	171972	I	C50F2.2	XLOC_000384	C50F2.2	chrI:3881835-3888218	no	yes
WBGene00002274	-0.483811	0.483811	0.217709	0.999353	0.508648	-0.508648	0.15045	0.97166	lec-11	177420	IV	F38A5.3a	XLOC_020848	lec-11	chrIV:6588223-6590125	no	yes
WBGene00002184	0.67881	-0.67881	0.0580815	0.999353	-0.903716	0.903716	0.56395	0.999956	kel-1	174791	II	C47D12.7a	XLOC_005702	kel-1	chrII:11688905-11695939	no	yes
WBGene00044344	-0.309014	0.309014	0.0461963	0.999353	0.292626	-0.292626	0.71035	0.999956	mrpl-39	3565110	V	Y46H3A.7a	XLOC_026309	mrpl-39	chrV:1743375-2713617	no	no
WBGene00006801	-0.281307	0.281307	0.183042	0.999353	0.282566	-0.282566	0.17955	0.999956	unc-68	179080	V	K11C4.5a	XLOC_030522	unc-68	chrV:6901997-6928931	no	no
WBGene00003219	-0.356313	0.356313	0.248514	0.999353	0.387265	-0.387265	0.1321	0.950369	mes-1	181362	X	F54F7.5	XLOC_034916	mes-1	chrX:11857432-11861826	no	no
WBGene00012119	0.683139	-0.683139	0.246282	0.999353	-0.702657	0.702657	0.13345	0.956283	T28C6.3	189035	IV	T28C6.3	XLOC_014187	T28C6.3	chrIV:8820342-8821151	no	no
WBGene00000370	-0.349649	0.349649	0.1289	0.999353	0.366254	-0.366254	0.2546	0.999956	ccg-1	178426	IV	Y73F8A.6	XLOC_023936	ccg-1	chrIV:15270265-15275729	no	no
WBGene00044188	0.310419	-0.310419	0.22466	0.999353	-0.40809	0.40809	0.14665	0.965779	F28F8.9	3896822	V	F28F8.9a	XLOC_032254	F28F8.9	chrV:15577633-15578467	no	yes
WBGene00007635	0.743422	-0.743422	0.15195	0.999353	-0.519736	0.519736	0.21685	0.999956	npr-4	182684	X	C16D6.2a	XLOC_037713	npr-4	chrX:12537398-12551452	no	no
WBGene00012636	1.15634	-1.15634	0.124899	0.999353	-1.19074	1.19074	0.26435	0.999956	Y38H8A.2	189703	IV	Y38H8A.2a	XLOC_015023	Y38H8A.2	chrIV:13474407-13476193	no	yes
WBGene00011531	0.617749	-0.617749	0.209612	0.999353	-0.728232	0.728232	0.1576	0.977714	rsbp-1	172729	I	T06D10.1	XLOC_002992	rsbp-1	chrI:9071670-9074661	no	yes
WBGene00020100	-0.530036	0.530036	0.306442	0.999353	0.644481	-0.644481	0.10795	0.928719	mks-1	187903	III	R148.1a	XLOC_008789	mks-1	chrIII:3186690-3192147	no	yes
WBGene00011967	0.298382	-0.298382	0.223612	0.999353	-0.317003	0.317003	0.14845	0.968357	pir-1	174460	II	T23G7.5a	XLOC_005318	pir-1	chrII:9177238-9178372	no	yes
WBGene00006776	0.25755	-0.25755	0.168819	0.999353	-0.259243	0.259243	0.19655	0.999956	unc-40	172233	I	T19B4.7	XLOC_002479	unc-40	chrI:5680368-5691443	no	yes
WBGene00007136	0.364602	-0.364602	0.458088	0.999353	-0.696247	0.696247	0.0726	0.8566	B0285.3	175560	III	B0285.3	XLOC_010707	B0285.3	chrIII:4342051-4343166	no	yes
WBGene00011561	-0.336054	0.336054	0.219298	0.999353	0.31007	-0.31007	0.15125	0.972535	ttr-15	176448	III	T07C4.5	XLOC_009851	ttr-15	chrIII:10337778-10339156	no	yes
WBGene00007072	-0.537971	0.537971	0.229807	0.999353	0.512512	-0.512512	0.1445	0.963997	ugt-1	179449	V	AC3.7	XLOC_027678	ugt-1	chrV:10395691-10397711	no	no
WBGene00017078	0.201675	-0.201675	0.351916	0.999353	-0.564923	0.564923	0.09455	0.901422	D2096.11	177638	IV	D2096.11	XLOC_021244	D2096.11	chrIV:8389133-8392850	no	no
WBGene00016066	-0.518713	0.518713	0.324762	0.999353	0.684191	-0.684191	0.10235	0.91622	acd-2	171992	I	C24G7.4	XLOC_000401	acd-2	chrI:4094611-4098112	no	no
WBGene00007101	0.232004	-0.232004	0.16036	0.999353	-0.25311	0.25311	0.2084	0.999956	B0024.11	179436	V	B0024.11	XLOC_031159	B0024.11	chrV:10317548-10319509	no	yes
WBGene00014210	0.34962	-0.34962	0.519202	0.999353	-0.828642	0.828642	0.06435	0.846661	ZK1067.4	191517	II	ZK1067.4	XLOC_005320	ZK1067.4	chrII:9210335-9212964	no	yes
WBGene00001022	0.355225	-0.355225	0.196932	0.999353	-0.350368	0.350368	0.1697	0.995294	dnj-4	172173	I	C01G8.4	XLOC_002401	dnj-4	chrI:5282265-5283929	no	no
WBGene00007507	-0.400358	0.400358	0.134815	0.999353	0.324851	-0.324851	0.24855	0.999956	C10C5.3	177767	IV	C10C5.3	XLOC_014280	C10C5.3	chrIV:9374837-9376405	no	no
WBGene00015153	0.333664	-0.333664	0.521658	0.999353	-0.685242	0.685242	0.1278	0.944937	B0348.5	181937	V	B0348.5a	XLOC_026074	B0348.5	chrV:5689-6511	no	yes
WBGene00002061	-0.0708117	0.0708117	0.634524	0.999353	0.0541941	-0.0541941	0.79145	0.999956	ife-3	178536	V	B0348.6a	XLOC_029471	ife-3	chrV:6935-7818	no	yes
WBGene00004496	0.0968199	-0.0968199	0.506481	0.999353	-0.223623	0.223623	0.25765	0.999956	rps-27	178538	V	F56E10.4	XLOC_029476	rps-27	chrV:103469-104036	no	yes
WBGene00018975	0.0770131	-0.0770131	0.679949	0.999353	-0.0946152	0.0946152	0.69555	0.999956	F56E10.1	186391	V	F56E10.1a	XLOC_026080	F56E10.1	chrV:104829-105964	no	yes
WBGene00000480	-0.116249	0.116249	0.50975	0.999353	0.117084	-0.117084	0.56585	0.999956	cgp-1	178540	V	Y38C9A.2a	XLOC_029477	cgp-1	chrV:118462-122752	no	yes
WBGene00020999	-0.1409	0.1409	0.355275	0.999353	0.141176	-0.141176	0.4796	0.999956	W03F9.1	189162	V	W03F9.1a	XLOC_029478	W03F9.1	chrV:124377-126649	no	yes
WBGene00021000	-0.127921	0.127921	0.605013	0.999353	0.113241	-0.113241	0.6658	0.999956	W03F9.2	178541	V	W03F9.2a	XLOC_029479	W03F9.2	chrV:127088-127951	no	yes
WBGene00021001	0.275214	-0.275214	0.616065	0.999353	-1.22858	1.22858	0.1257	0.944937	W03F9.3	NA	V		XLOC_029480	W03F9.3	chrV:132707-132998	no	yes
WBGene00006648	-0.0654989	0.0654989	0.743545	0.999353	0.143359	-0.143359	0.5248	0.999956	ttb-1	178544	V	W03F9.5	XLOC_026086	ttb-1	chrV:156830-163350	no	yes
WBGene00235163	0.380163	-0.380163	0.535115	0.999353	-0.339596	0.339596	1	1	Y108G3AL.10	NA	V		XLOC_026088	Y108G3AL.10	chrV:172813-173164	no	yes
WBGene00000838	0.0208309	-0.0208309	0.904051	0.999353	-0.0111928	0.0111928	0.95755	0.999956	cul-3	178547	V	Y108G3AL.1a	XLOC_026089	cul-3	chrV:177644-184454	no	yes
WBGene00044689	0.00641757	-0.00641757	0.975862	0.999353	-0.0182007	0.0182007	0.92825	0.999956	arid-1	4363100	V	Y108G3AL.7a	XLOC_026090	arid-1	chrV:186366-200432	no	yes
WBGene00077643	0.335815	-0.335815	0.353645	0.999353	-0.208904	0.208904	626	0.999956	trpp-1	6418789	V	DC2.8a	XLOC_026091	trpp-1	chrV:201623-202775	no	yes
WBGene00017080	-0.172895	0.172895	0.374537	0.999353	0.188044	-0.188044	0.4477	0.999956	lec-12	178548	V	DC2.3a	XLOC_026092	lec-12	chrV:204390-209631	no	yes
WBGene00018010	-0.0634589	0.0634589	0.744419	0.999353	-0.0292472	0.0292472	0.9006	0.999956	F33E11.2	178555	V	F33E11.2a	XLOC_026096	F33E11.2	chrV:296598-298941	no	yes
WBGene00018011	-0.0925988	0.0925988	0.570589	0.999353	0.0676993	-0.0676993	0.7342	0.999956	F33E11.3	178556	V	F33E11.3	XLOC_029497	F33E11.3	chrV:300358-304697	no	yes
WBGene00018013	0.138048	-0.138048	0.377324	0.999353	-0.177491	0.177491	0.39555	0.999956	phf-10	3565141	V	F33E11.6a	XLOC_029498	phf-10	chrV:306014-311536	no	yes
WBGene00003722	0.3412	-0.3412	0.587805	0.999353	-0.24836	0.24836	0.56025	0.999956	nhr-132	187822	V	R11G11.1	XLOC_026142	nhr-132	chrV:534517-536168	no	yes
WBGene00015759	-0.156934	0.156934	0.726494	0.999353	0.135339	-0.135339	0.6287	0.999956	C14C6.5	178574	V	C14C6.5a	XLOC_026143	C14C6.5	chrV:536647-537376	no	yes
WBGene00001564	-0.236862	0.236862	0.428995	0.999353	0.234033	-0.234033	0.29295	0.999956	icl-1	178583	V	C05E4.9a	XLOC_029556	icl-1	chrV:724457-727958	no	yes
WBGene00019983	-0.0729339	0.0729339	0.622146	0.999353	0.0865946	-0.0865946	0.6615	0.999956	sti-1	178587	V	R09E12.3	XLOC_026185	sti-1	chrV:773591-774716	no	yes
WBGene00019563	0.235656	-0.235656	0.744479	0.999353	-0.368956	0.368956	0.4024	0.999956	K09C6.9	187204	V	K09C6.9	XLOC_029570	K09C6.9	chrV:853490-855065	no	yes
WBGene00019556	0.0803688	-0.0803688	0.883467	0.999353	0.151576	-0.151576	1	1	K09C6.2	187199	V		XLOC_026202	K09C6.2	chrV:856849-858454	no	yes
WBGene00021747	0.173311	-0.173311	0.413432	0.999353	-0.269109	0.269109	0.30775	0.999956	Y50D4C.2	NA	V		XLOC_026211	Y50D4C.2	chrV:936398-939229	no	yes
WBGene00021748	-0.128751	0.128751	0.448	0.999353	0.133835	-0.133835	0.5382	0.999956	Y50D4C.3	178599	V	Y50D4C.3a	XLOC_029579	Y50D4C.3	chrV:939643-945245	no	yes
WBGene00005024	-0.062808	0.062808	0.675395	0.999353	0.0446513	-0.0446513	0.8231	0.999956	sqv-6	190099	V	Y50D4C.4a	XLOC_029581	sqv-6	chrV:951605-964778	no	yes
WBGene00006770	0.251179	-0.251179	0.306936	0.999353	-0.266749	0.266749	0.2911	0.999956	unc-34	190098	V	Y50D4C.1a	XLOC_026213	unc-34	chrV:985094-995405	no	yes
WBGene00021749	0.0245704	-0.0245704	0.905987	0.999353	0.0248952	-0.0248952	0.77545	0.999956	Y50D4C.5	190100	V	Y50D4C.5a	XLOC_029582	Y50D4C.5	chrV:998446-1689685	no	yes
WBGene00019971	-0.0858409	0.0858409	0.74119	0.999353	0.0744563	-0.0744563	0.9161	0.999956	ergo-1	178602	V	R09A1.1a	XLOC_026214	ergo-1	chrV:998446-1689685	no	yes
WBGene00019972	-0.0707497	0.0707497	0.817265	0.999353	0.0157398	-0.0157398	0.9911	0.999956	R09A1.2	178603	V	R09A1.2a	XLOC_029584	R09A1.2	chrV:998446-1689685	no	yes
WBGene00219734	-0.163689	0.163689	0.773762	0.999353	0.332942	-0.332942	1	1	linc-128	NA	V		XLOC_026228	linc-128	chrV:998446-1689685	no	yes
WBGene00000552	0.0509717	-0.0509717	0.761687	0.999353	-0.036507	0.036507	0.96665	0.999956	cmd-1	178614	V	T21H3.3a	XLOC_026229	cmd-1	chrV:998446-1689685	no	yes
WBGene00021738	0.123522	-0.123522	0.478098	0.999353	-0.158117	0.158117	0.8767	0.999956	Y50D4A.4	178616	V	Y50D4A.4a	XLOC_029602	Y50D4A.4	chrV:998446-1689685	no	yes
WBGene00021736	-0.0862393	0.0862393	0.68327	0.999353	0.0661037	-0.0661037	972	0.999956	wrb-1	178617	V	Y50D4A.2a	XLOC_026236	wrb-1	chrV:998446-1689685	no	yes
WBGene00195169	0.270605	-0.270605	0.614783	0.999353	-0.289845	0.289845	0.84165	0.999956	Y50D4A.6	13211597	V	Y50D4A.6a	XLOC_029603	Y50D4A.6	chrV:998446-1689685	no	yes
WBGene00021739	0.0949778	-0.0949778	0.733584	0.999353	-0.584594	0.584594	0.6999	0.999956	Y50D4A.5	259612	V	Y50D4A.5	XLOC_026238	Y50D4A.5	chrV:998446-1689685	no	yes
WBGene00021735	0.114022	-0.114022	0.508202	0.999353	-0.129525	0.129525	0.89215	0.999956	Y50D4A.1	178618	V	Y50D4A.1a	XLOC_026224	Y50D4A.1	chrV:998446-1689685	no	yes
WBGene00016538	0.362399	-0.362399	0.583631	0.999353	-0.611112	0.611112	0.6669	0.999956	C39F7.1	183348	V	C39F7.1a	XLOC_026240	C39F7.1	chrV:998446-1689685	no	yes
WBGene00004266	0.0159673	-0.0159673	0.935145	0.999353	0.0129094	-0.0129094	0.99055	0.999956	rab-1	178620	V	C39F7.4	XLOC_029608	rab-1	chrV:998446-1689685	no	yes
WBGene00022288	-0.329735	0.329735	0.512371	0.999353	0.198382	-0.198382	0.89465	0.999956	Y75B7B.1	190699	V	Y75B7B.1	XLOC_026243	Y75B7B.1	chrV:998446-1689685	no	yes
WBGene00022286	-0.104527	0.104527	0.627992	0.999353	0.111283	-0.111283	0.86825	0.999956	rga-4	178629	V	Y75B7AL.4a	XLOC_029615	rga-4	chrV:998446-1689685	no	yes
WBGene00019980	0.59892	-0.59892	0.192003	0.999353	-0.411548	0.411548	765	0.999956	chil-14	187730	V	R09B5.12a	XLOC_026254	chil-14	chrV:998446-1689685	no	yes
WBGene00019978	-0.18955	0.18955	0.561461	0.999353	0.219655	-0.219655	0.9178	0.999956	hacd-1	178638	V	R09B5.6	XLOC_026255	hacd-1	chrV:998446-1689685	no	yes
WBGene00018757	0.237589	-0.237589	0.314224	0.999353	-0.165381	0.165381	0.91915	0.999956	tag-304	178639	V	F53E2.1a	XLOC_026257	tag-304	chrV:998446-1689685	no	yes
WBGene00006794	0.0410426	-0.0410426	0.893542	0.999353	0.249323	-0.249323	0.80605	0.999956	unc-60	178640	V	C38C3.5	XLOC_026258	unc-60	chrV:998446-1689685	no	yes
WBGene00017504	0.0485269	-0.0485269	0.946411	0.999353	-0.458118	0.458118	0.7896	0.999956	F16B4.2	178649	V	F16B4.2a	XLOC_026272	F16B4.2	chrV:998446-1689685	no	yes
WBGene00022805	-0.148729	0.148729	0.611081	0.999353	0.152387	-0.152387	0.91125	0.999956	nhr-256	191409	V	ZK697.2a	XLOC_026301	nhr-256	chrV:1743375-2713617	no	yes
WBGene00020393	-0.251606	0.251606	0.526385	0.999353	0.237949	-0.237949	0.8785	0.999956	T10B5.7	178665	V	T10B5.7a	XLOC_026311	T10B5.7	chrV:1743375-2713617	no	yes
WBGene00020388	-0.173178	0.173178	0.802484	0.999353	-0.794798	0.794798	1	1	T10B5.2	NA	V		XLOC_029670	T10B5.2	chrV:1743375-2713617	no	yes
WBGene00020389	-0.0739272	0.0739272	0.632421	0.999353	0.0255823	-0.0255823	0.97765	0.999956	T10B5.3	178667	V	T10B5.3a	XLOC_029673	T10B5.3	chrV:1743375-2713617	no	yes
WBGene00020392	-0.113043	0.113043	0.442664	0.999353	0.106904	-0.106904	0.8962	0.999956	knl-3	178669	V	T10B5.6	XLOC_026312	knl-3	chrV:1743375-2713617	no	yes
WBGene00020390	0.343654	-0.343654	0.407147	0.999353	-0.51759	0.51759	0.7184	0.999956	T10B5.4	178668	V	T10B5.4a	XLOC_029674	T10B5.4	chrV:1743375-2713617	no	yes
WBGene00020391	-0.137469	0.137469	0.527823	0.999353	0.122103	-0.122103	0.85405	0.999956	cct-7	178670	V	T10B5.5a	XLOC_026314	cct-7	chrV:1743375-2713617	no	yes
WBGene00020341	0.165421	-0.165421	0.804459	0.999353	0.426172	-0.426172	0.73675	0.999956	T08B1.4	188269	V		XLOC_026328	T08B1.4	chrV:1743375-2713617	no	yes
WBGene00020340	-0.277391	0.277391	0.319852	0.999353	0.287254	-0.287254	0.84235	0.999956	T08B1.1	178678	V	T08B1.1a	XLOC_029687	T08B1.1	chrV:1743375-2713617	no	yes
WBGene00006589	-0.119554	0.119554	0.789168	0.999353	-0.0230923	0.0230923	0.9856	0.999956	tnt-4	178679	V	T08B1.2a	XLOC_029688	tnt-4	chrV:1743375-2713617	no	yes
WBGene00019096	0.47268	-0.47268	0.348946	0.999353	-0.414052	0.414052	761	0.999956	cysl-4	186587	V	F59A7.9	XLOC_026330	cysl-4	chrV:1743375-2713617	no	yes
WBGene00019095	0.0131131	-0.0131131	0.950721	0.999353	0.00458766	-0.00458766	0.99665	0.999956	F59A7.8	NA	V		XLOC_026331	F59A7.8	chrV:1743375-2713617	no	yes
WBGene00019094	0.409689	-0.409689	0.502504	0.999353	0.0861599	-0.0861599	0.95745	0.999956	F59A7.7	186586	V	F59A7.7	XLOC_026332	F59A7.7	chrV:1743375-2713617	no	yes
WBGene00003676	-0.175139	0.175139	0.304789	0.999353	0.185971	-0.185971	0.62995	0.999956	nhr-86	178685	V	Y40B10A.8a	XLOC_029701	nhr-86	chrV:1743375-2713617	no	yes
WBGene00021486	0.08075	-0.08075	0.65267	0.999353	-0.136872	0.136872	0.8343	0.999956	lbp-9	178686	V	Y40B10A.1a	XLOC_026337	lbp-9	chrV:1743375-2713617	no	yes
WBGene00021493	-0.020474	0.020474	0.956731	0.999353	-0.114495	0.114495	0.92865	0.999956	Y40B10A.9	178687	V	Y40B10A.9a	XLOC_029702	Y40B10A.9	chrV:1743375-2713617	no	yes
WBGene00017720	-0.118914	0.118914	0.802076	0.999353	0.847312	-0.847312	0.5785	0.999956	F22F7.2	184861	V	F22F7.2	XLOC_026346	F22F7.2	chrV:1743375-2713617	no	yes
WBGene00017724	-1.15827	1.15827	0.0838117	0.999353	0.602943	-0.602943	0.73895	0.999956	F22F7.7	178693	V	F22F7.7a	XLOC_029709	F22F7.7	chrV:1743375-2713617	no	yes
WBGene00018762	0.209512	-0.209512	0.316039	0.999353	-0.286351	0.286351	0.87515	0.999956	F53E10.6	178728	V	F53E10.6	XLOC_029771	F53E10.6	chrV:1743375-2713617	no	yes
WBGene00020955	-0.123281	0.123281	0.494535	0.999353	0.151705	-0.151705	0.91755	0.999956	angl-1	189127	V	W02G9.5a	XLOC_026435	angl-1	chrV:1743375-2713617	no	yes
WBGene00003579	-0.365486	0.365486	0.167495	0.999353	0.441045	-0.441045	0.7414	0.999956	ndx-2	189126	V	W02G9.1	XLOC_029781	ndx-2	chrV:1743375-2713617	no	yes
WBGene00020954	-0.0974007	0.0974007	0.787779	0.999353	-0.0604684	0.0604684	0.96705	0.999956	W02G9.4	178731	V	W02G9.4a	XLOC_026437	W02G9.4	chrV:1743375-2713617	no	yes
WBGene00020952	-0.206093	0.206093	0.432064	0.999353	0.23585	-0.23585	0.8791	0.999956	kel-8	3565011	V	W02G9.2a	XLOC_026439	kel-8	chrV:1743375-2713617	no	yes
WBGene00020953	0.105169	-0.105169	0.639889	0.999353	-0.128005	0.128005	935	0.999956	W02G9.3	178732	V	W02G9.3	XLOC_026438	W02G9.3	chrV:1743375-2713617	no	yes
WBGene00021564	-0.0687946	0.0687946	0.688008	0.999353	0.070769	-0.070769	0.9668	0.999956	Y45G12B.3	178733	V	Y45G12B.3a	XLOC_029783	Y45G12B.3	chrV:1743375-2713617	no	yes
WBGene00021563	-0.0431239	0.0431239	0.812703	0.999353	-0.038544	0.038544	0.98055	0.999956	Y45G12B.2	178734	V	Y45G12B.2a	XLOC_026440	Y45G12B.2	chrV:1743375-2713617	no	yes
WBGene00021562	-0.147823	0.147823	0.388723	0.999353	0.135662	-0.135662	0.8204	0.999956	nuo-5	178735	V	Y45G12B.1	XLOC_026441	nuo-5	chrV:1743375-2713617	no	yes
WBGene00016048	0.04952	-0.04952	0.871369	0.999353	-0.12054	0.12054	0.9451	0.999956	C24B9.3	178736	V	C24B9.3	XLOC_029784	C24B9.3	chrV:1743375-2713617	no	yes
WBGene00017175	0.125546	-0.125546	0.798633	0.999353	-0.0257351	0.0257351	0.9367	0.999956	irld-3	184075	V	F02C9.4	XLOC_029876	irld-3	chrV:3137493-3138208	no	yes
WBGene00000168	0.0488252	-0.0488252	0.834926	0.999353	-0.078422	0.078422	0.72865	0.999956	apx-1	178759	V	K08D9.3a	XLOC_026494	apx-1	chrV:3210226-3222447	no	yes
WBGene00004422	-0.0911798	0.0911798	0.584874	0.999353	0.035971	-0.035971	0.8774	0.999956	rpl-11.1	178778	V	T22F3.4a	XLOC_029963	rpl-11.1	chrV:3585365-3586055	no	yes
WBGene00020695	0.0224647	-0.0224647	0.891201	0.999353	-0.0411998	0.0411998	0.84695	0.999956	T22F3.2	178779	V	T22F3.2a	XLOC_026557	T22F3.2	chrV:3586636-3588733	no	yes
WBGene00021080	-0.323662	0.323662	0.522951	0.999353	0.647827	-0.647827	0.2522	0.999956	W08A12.3	178785	V	W08A12.3a	XLOC_026564	W08A12.3	chrV:3682900-3686238	no	yes
WBGene00021079	0.102784	-0.102784	0.884137	0.999353	-1.24487	1.24487	0.37215	0.999956	W08A12.2	178786	V	W08A12.2a	XLOC_029980	W08A12.2	chrV:3682900-3686238	no	yes
WBGene00021078	-0.232803	0.232803	0.32133	0.999353	0.215312	-0.215312	0.3077	0.999956	unc-132	178787	V	W08A12.1a	XLOC_026565	unc-132	chrV:3690551-3701328	no	yes
WBGene00003025	-0.117111	0.117111	0.469231	0.999353	0.0778543	-0.0778543	0.70595	0.999956	lin-40	178788	V	T27C4.4a	XLOC_026566	lin-40	chrV:3704998-3712490	no	yes
WBGene00000498	-0.0304152	0.0304152	0.83809	0.999353	-0.0122491	0.0122491	0.9518	0.999956	chk-1	3565921	V	Y39H10A.7a	XLOC_029986	chk-1	chrV:3757303-3759449	no	yes
WBGene00021479	0.176535	-0.176535	0.787311	0.999353	-0.0891899	0.0891899	1	1	oac-55	178792	V	Y39H10A.2a	XLOC_026570	oac-55	chrV:3761124-3766292	no	yes
WBGene00017035	0.685995	-0.685995	0.266131	0.999353	-0.928091	0.928091	1	1	D1065.3	NA	V		XLOC_030031	D1065.3	chrV:4059816-4062078	no	yes
WBGene00021554	0.0147095	-0.0147095	0.949102	0.999353	-0.0382342	0.0382342	0.8654	0.999956	Y45G5AL.1	178814	V	Y45G5AL.1a	XLOC_026640	Y45G5AL.1	chrV:4144504-4147250	no	yes
WBGene00021558	-0.0908287	0.0908287	0.813497	0.999353	0.164117	-0.164117	0.61305	0.999956	Y45G5AM.6	178815	V	Y45G5AM.6a	XLOC_030046	Y45G5AM.6	chrV:4147691-4152208	no	yes
WBGene00021556	0.130668	-0.130668	0.603409	0.999353	-0.120754	0.120754	0.64505	0.999956	Y45G5AM.3	189928	V	Y45G5AM.3a	XLOC_026645	Y45G5AM.3	chrV:4164829-4166744	no	yes
WBGene00021560	0.100531	-0.100531	0.616035	0.999353	-0.0644139	0.0644139	0.76455	0.999956	coh-4	178818	V	Y45G5AM.8a	XLOC_030049	coh-4	chrV:4170105-4175611	no	yes
WBGene00021555	0.0585659	-0.0585659	0.742149	0.999353	-0.0638813	0.0638813	0.7543	0.999956	Y45G5AM.2	178819	V	Y45G5AM.2a	XLOC_026646	Y45G5AM.2	chrV:4175909-4181135	no	yes
WBGene00021561	0.247599	-0.247599	0.184073	0.999353	-0.282336	0.282336	0.31225	0.999956	Y45G5AM.9	178820	V	Y45G5AM.9a	XLOC_030050	Y45G5AM.9	chrV:4181569-4191494	no	yes
WBGene00003704	0.130848	-0.130848	0.510244	0.999353	-0.151894	0.151894	0.66345	0.999956	nhr-114	178821	V	Y45G5AM.1a	XLOC_026647	nhr-114	chrV:4181569-4191494	no	yes
WBGene00017062	-0.0488721	0.0488721	0.7966	0.999353	0.0354735	-0.0354735	0.86655	0.999956	glrx-3	178828	V	D2063.3a	XLOC_030073	glrx-3	chrV:4338988-4341293	no	yes
WBGene00017981	-0.0809812	0.0809812	0.609515	0.999353	0.0497543	-0.0497543	0.8076	0.999956	figl-1	178829	V	F32D1.1a	XLOC_030074	figl-1	chrV:4341612-4345982	no	yes
WBGene00003159	-0.0079158	0.0079158	0.965625	0.999353	0.00102793	-0.00102793	0.99635	0.999956	mcm-7	178831	V	F32D1.10	XLOC_026658	mcm-7	chrV:4347183-4349530	no	yes
WBGene00017983	-0.315589	0.315589	0.649992	0.999353	0.232686	-0.232686	1	1	F32D1.3	178832	V	F32D1.3a	XLOC_030076	F32D1.3	chrV:4349851-4361531	no	yes
WBGene00044530	0.0967032	-0.0967032	0.864981	0.999353	-0.20971	0.20971	0.64955	0.999956	F32D1.11	3896832	V	F32D1.11	XLOC_030078	F32D1.11	chrV:4365537-4366448	no	yes
WBGene00017984	-0.152587	0.152587	0.342334	0.999353	0.134543	-0.134543	0.5133	0.999956	F32D1.5	178834	V	F32D1.5a	XLOC_030079	F32D1.5	chrV:4369454-4371328	no	yes
WBGene00017988	-0.0381285	0.0381285	0.813974	0.999353	0.0434247	-0.0434247	0.8321	0.999956	fipp-1	178835	V	F32D1.9a	XLOC_026660	fipp-1	chrV:4371888-4373638	no	yes
WBGene00017985	0.0273902	-0.0273902	0.897939	0.999353	0.00688511	-0.00688511	0.98	0.999956	neg-1	185201	V	F32D1.6a	XLOC_030080	neg-1	chrV:4373911-4374832	no	yes
WBGene00017986	-0.100757	0.100757	0.58078	0.999353	0.0761999	-0.0761999	0.69995	0.999956	F32D1.7	178836	V	F32D1.7	XLOC_030081	F32D1.7	chrV:4375123-4376153	no	yes
WBGene00044637	-0.382939	0.382939	0.301417	0.999353	0.326086	-0.326086	0.3236	0.999956	rft-1	3896860	V	Y47D7A.16a	XLOC_030103	rft-1	chrV:4439147-4443075	no	yes
WBGene00021626	-0.0967969	0.0967969	0.566516	0.999353	0.0924089	-0.0924089	0.6579	0.999956	rft-2	178842	V	Y47D7A.14a	XLOC_030104	rft-2	chrV:4443508-4450535	no	yes
WBGene00019224	-0.343013	0.343013	0.668784	0.999353	0.056666	-0.056666	1	1	gnrr-5	186759	V	H22D07.1	XLOC_030105	gnrr-5	chrV:4451267-4454716	no	yes
WBGene00022019	-0.0024973	0.0024973	0.989504	0.999353	-0.0141436	0.0141436	0.9517	0.999956	sut-2	178847	V	Y61A9LA.8	XLOC_030109	sut-2	chrV:4562635-4570013	no	yes
WBGene00022015	0.081923	-0.081923	0.680946	0.999353	-0.10863	0.10863	0.60745	0.999956	Y61A9LA.3	178848	V	Y61A9LA.3a	XLOC_026671	Y61A9LA.3	chrV:4571128-4585066	no	yes
WBGene00022014	0.115521	-0.115521	0.589206	0.999353	-0.00552588	0.00552588	0.98055	0.999956	Y61A9LA.1	178849	V	Y61A9LA.1a	XLOC_026672	Y61A9LA.1	chrV:4592918-4601588	no	yes
WBGene00018814	0.0761573	-0.0761573	0.757367	0.999353	-0.0781089	0.0781089	0.76305	0.999956	F54D11.4	178852	V	F54D11.4	XLOC_026673	F54D11.4	chrV:4616167-4617644	no	yes
WBGene00018812	0.07909	-0.07909	0.749719	0.999353	-0.0931816	0.0931816	0.64745	0.999956	sumv-2	24104625	V	F54D11.2	XLOC_026674	sumv-2	chrV:4617932-4627566	no	yes
WBGene00000712	-0.303176	0.303176	0.336013	0.999353	0.283154	-0.283154	0.21425	0.999956	col-139	178857	V	F41F3.4	XLOC_030115	col-139	chrV:4652895-4653944	no	yes
WBGene00018296	0.0239472	-0.0239472	0.970418	0.999353	-0.218933	0.218933	0.6351	0.999956	F41F3.1	185626	V	F41F3.1	XLOC_026678	F41F3.1	chrV:4654575-4655772	no	yes
WBGene00006392	0.257995	-0.257995	0.23221	0.999353	-0.279419	0.279419	0.22565	0.999956	taf-10	3564983	V	K03B4.3a	XLOC_026680	taf-10	chrV:4687099-4687801	no	yes
WBGene00019354	-0.0919519	0.0919519	0.75584	0.999353	0.0780347	-0.0780347	0.7582	0.999956	K03B4.2	178858	V	K03B4.2	XLOC_026681	K03B4.2	chrV:4687992-4688860	no	yes
WBGene00019353	-0.0980733	0.0980733	0.566094	0.999353	0.0565289	-0.0565289	0.7805	0.999956	K03B4.1	178859	V	K03B4.1	XLOC_026682	K03B4.1	chrV:4689325-4691551	no	yes
WBGene00019357	0.107692	-0.107692	0.595557	0.999353	0.0232905	-0.0232905	0.92175	0.999956	cpg-8	178860	V	K03B4.7a	XLOC_030122	cpg-8	chrV:4691740-4692397	no	yes
WBGene00022584	-0.267378	0.267378	0.512931	0.999353	0.346153	-0.346153	0.31035	0.999956	ZC266.1	191134	V	ZC266.1	XLOC_030123	ZC266.1	chrV:4695133-4700275	no	yes
WBGene00006570	0.303536	-0.303536	0.440238	0.999353	-0.424076	0.424076	0.1982	0.999956	tig-2	178864	V	F39G3.8	XLOC_030125	tig-2	chrV:4726781-4730106	no	yes
WBGene00018208	0.209825	-0.209825	0.351877	0.999353	-0.12018	0.12018	0.62475	0.999956	F39G3.3	178865	V	F39G3.3	XLOC_026686	F39G3.3	chrV:4731768-4733670	no	yes
WBGene00018207	-0.194666	0.194666	0.434974	0.999353	0.130586	-0.130586	618	0.999956	F39G3.2	185501	V	F39G3.2	XLOC_026687	F39G3.2	chrV:4737830-4741123	no	yes
WBGene00001855	0.12557	-0.12557	0.420541	0.999353	-0.127426	0.127426	0.5102	0.999956	hil-4	178866	V	C18G1.5	XLOC_026691	hil-4	chrV:4754338-4755286	no	yes
WBGene00003994	-0.0121871	0.0121871	0.933949	0.999353	0.0106881	-0.0106881	0.95785	0.999956	pgl-3	178867	V	C18G1.4a	XLOC_026692	pgl-3	chrV:4755995-4758405	no	yes
WBGene00019841	0.0632059	-0.0632059	0.832264	0.999353	-0.0653857	0.0653857	0.81095	0.999956	R02F11.3	178869	V	R02F11.3a	XLOC_030131	R02F11.3	chrV:4802905-4805925	no	yes
WBGene00019842	-0.00080086	0.00080086	0.997046	0.999467	-0.0253615	0.0253615	0.90695	0.999956	R02F11.4	178871	V	R02F11.4	XLOC_030133	R02F11.4	chrV:4811088-4818648	no	yes
WBGene00002010	-0.155345	0.155345	0.4028	0.999353	0.157299	-0.157299	0.4319	0.999956	hsp-6	178873	V	C37H5.8	XLOC_030135	hsp-6	chrV:4824590-4826741	no	yes
WBGene00201966	-0.344203	0.344203	0.513763	0.999353	0.0204787	-0.0204787	1	1	C37H5.16	NA	V		XLOC_030136	C37H5.16	chrV:4826978-4827262	no	yes
WBGene00016508	0.158468	-0.158468	0.401897	0.999353	-0.186609	0.186609	0.3612	0.999956	C37H5.5	178874	V	C37H5.5	XLOC_026705	C37H5.5	chrV:4827350-4835920	no	yes
WBGene00003528	0.174328	-0.174328	0.538655	0.999353	-0.183444	0.183444	0.5026	0.999956	nas-9	178875	V	C37H5.9a	XLOC_030138	nas-9	chrV:4836022-4839905	no	yes
WBGene00020589	0.623686	-0.623686	0.352031	0.999353	-0.641243	0.641243	0.19375	0.999956	T19H12.3	178879	V	T19H12.3	XLOC_026714	T19H12.3	chrV:4885690-4886756	no	yes
WBGene00020592	-0.288109	0.288109	0.222839	0.999353	0.296513	-0.296513	0.19345	0.999956	ugt-12	178880	V	T19H12.9	XLOC_030145	ugt-12	chrV:4887206-4889581	no	yes
WBGene00020588	0.0252251	-0.0252251	0.868014	0.999353	-0.00937903	0.00937903	0.96415	0.999956	T19H12.2	178881	V	T19H12.2	XLOC_026715	T19H12.2	chrV:4890443-4891224	no	yes
WBGene00020593	0.141849	-0.141849	0.766256	0.999353	-0.12966	0.12966	0.7263	0.999956	ugt-11	178882	V	T19H12.10	XLOC_030146	ugt-11	chrV:4892613-4894934	no	yes
WBGene00020587	0.0826869	-0.0826869	0.867063	0.999353	-0.127514	0.127514	0.72865	0.999956	ugt-9	178883	V	T19H12.1a	XLOC_026716	ugt-9	chrV:4896041-4897894	no	yes
WBGene00006523	0.0143896	-0.0143896	0.929996	0.999353	-0.0157737	0.0157737	0.93865	0.999956	tam-1	178887	V	F26G5.9	XLOC_030157	tam-1	chrV:4958971-4962980	no	yes
WBGene00004795	0.21954	-0.21954	0.259026	0.999353	-0.250682	0.250682	0.25225	0.999956	sid-1	178900	V	C04F5.1	XLOC_026748	sid-1	chrV:5119961-5126586	no	yes
WBGene00017467	-0.0652546	0.0652546	0.923627	0.999353	0.0890272	-0.0890272	1	1	F14F9.4	178901	V	F14F9.4	XLOC_026751	F14F9.4	chrV:5132745-5137010	no	yes
WBGene00015075	0.0398518	-0.0398518	0.847806	0.999353	-0.0649259	0.0649259	0.80835	0.999956	B0238.11	178915	V	B0238.11	XLOC_026770	B0238.11	chrV:5260315-5403348	no	yes
WBGene00015073	0.0492071	-0.0492071	0.812101	0.999353	-0.0420464	0.0420464	0.9503	0.999956	B0238.9	178917	V	B0238.9	XLOC_030216	B0238.9	chrV:5260315-5403348	no	yes
WBGene00015684	-0.162859	0.162859	0.453647	0.999353	0.224971	-0.224971	0.83455	0.999956	C10G8.8	178920	V	C10G8.8a	XLOC_030220	C10G8.8	chrV:5260315-5403348	no	yes
WBGene00017261	-0.0524719	0.0524719	0.764405	0.999353	0.0416408	-0.0416408	0.83735	0.999956	acl-6	178928	V	F08F3.2a	XLOC_026795	acl-6	chrV:5433400-5436933	no	yes
WBGene00001037	0.0621834	-0.0621834	0.755237	0.999353	-0.0703494	0.0703494	0.7263	0.999956	dnj-19	3565862	V	T05C3.5	XLOC_030247	dnj-19	chrV:5503221-5504829	no	yes
WBGene00219829	-0.530949	0.530949	0.411352	0.999353	0	0	1	1	C24G6.12	NA	V		XLOC_030248	C24G6.12	chrV:5504948-5505031	no	yes
WBGene00016061	-0.00940486	0.00940486	0.972624	0.999353	0.0191927	-0.0191927	0.93495	0.999956	hpo-15	178934	V	C24G6.6	XLOC_030250	hpo-15	chrV:5510018-5512485	no	yes
WBGene00006376	0.161472	-0.161472	0.507313	0.999353	-0.215664	0.215664	0.3178	0.999956	syp-2	178938	V	C24G6.1	XLOC_026808	syp-2	chrV:5536752-5537533	no	yes
WBGene00000477	-0.353658	0.353658	0.568215	0.999353	0.425876	-0.425876	1	1	cft-1	178939	V	C18C4.2	XLOC_026809	cft-1	chrV:5538783-5545636	no	yes
WBGene00002215	0.0203596	-0.0203596	0.911593	0.999353	0.0165472	-0.0165472	0.9714	0.999956	klc-2	178942	V	C18C4.10a	XLOC_030261	klc-2	chrV:5575436-5581325	no	yes
WBGene00003927	-0.187791	0.187791	0.369309	0.999353	0.173288	-0.173288	0.40435	0.999956	pas-6	178943	V	CD4.6	XLOC_030263	pas-6	chrV:5583341-5584318	no	yes
WBGene00016990	-0.0544478	0.0544478	0.812745	0.999353	0.0128842	-0.0128842	0.9592	0.999956	vps-37	178944	V	CD4.4	XLOC_026819	vps-37	chrV:5592690-5593501	no	yes
WBGene00000795	-0.203762	0.203762	0.342813	0.999353	0.141222	-0.141222	0.55625	0.999956	crn-2	178945	V	CD4.2	XLOC_026821	crn-2	chrV:5594629-5595650	no	yes
WBGene00016992	0.0855062	-0.0855062	0.709716	0.999353	-0.169523	0.169523	0.4492	0.999956	zhit-1	183878	V	CD4.7a	XLOC_030266	zhit-1	chrV:5595729-5596460	no	yes
WBGene00022970	-0.0505649	0.0505649	0.831124	0.999353	0.169428	-0.169428	0.49905	0.999956	CD4.10	NA	V		XLOC_030267	CD4.10	chrV:5597044-5597434	no	yes
WBGene00016993	-0.00613869	0.00613869	0.972177	0.999353	-0.0136691	0.0136691	0.94765	0.999956	CD4.8	178947	V	CD4.8	XLOC_030268	CD4.8	chrV:5599259-5601313	no	yes
WBGene00019755	-0.00727963	0.00727963	0.992906	0.999353	-0.262234	0.262234	0.62665	0.999956	M03E7.3	187423	V	M03E7.3	XLOC_026827	M03E7.3	chrV:5615026-5616257	no	yes
WBGene00019757	-0.0644054	0.0644054	0.758455	0.999353	-0.0166296	0.0166296	0.93535	0.999956	memb-2	187425	V	M03E7.5	XLOC_030273	memb-2	chrV:5618332-5619180	no	yes
WBGene00015766	0.0972478	-0.0972478	0.619927	0.999353	-0.169719	0.169719	0.44005	0.999956	C14C11.2	178953	V	C14C11.2	XLOC_026835	C14C11.2	chrV:5661248-5663357	no	yes
WBGene00015765	-0.0184888	0.0184888	0.932376	0.999353	-0.266904	0.266904	0.3512	0.999956	C14C11.1	182610	V	C14C11.1	XLOC_026836	C14C11.1	chrV:5663637-5665209	no	yes
WBGene00015769	-0.0271135	0.0271135	0.90582	0.999353	-0.0332859	0.0332859	0.89685	0.999956	C14C11.7	182612	V	C14C11.7	XLOC_030279	C14C11.7	chrV:5665408-5666049	no	yes
WBGene00017768	0.0391755	-0.0391755	0.846508	0.999353	-0.0319631	0.0319631	0.8801	0.999956	F25B4.5	178955	V	F25B4.5	XLOC_030283	F25B4.5	chrV:5678857-5682614	no	yes
WBGene00017769	-0.0851836	0.0851836	0.615405	0.999353	0.0499274	-0.0499274	0.80875	0.999956	hmgs-1	178956	V	F25B4.6	XLOC_030284	hmgs-1	chrV:5682846-5684571	no	yes
WBGene00017767	0.0973994	-0.0973994	0.656211	0.999353	-0.0890344	0.0890344	0.6896	0.999956	F25B4.4	178957	V	F25B4.4	XLOC_026838	F25B4.4	chrV:5684871-5685679	no	yes
WBGene00017770	0.0964128	-0.0964128	0.624423	0.999353	-0.118818	0.118818	0.58575	0.999956	F25B4.7	184917	V	F25B4.7	XLOC_030286	F25B4.7	chrV:5685862-5687154	no	yes
WBGene00017771	-0.213087	0.213087	0.704604	0.999353	0.435754	-0.435754	0.28855	0.999956	F25B4.8	184918	V	F25B4.8a	XLOC_030287	F25B4.8	chrV:5690134-5691540	no	yes
WBGene00019600	-0.0957418	0.0957418	0.637357	0.999353	0.103185	-0.103185	0.6052	0.999956	rga-3	178961	V	K09H11.3	XLOC_026847	rga-3	chrV:5717888-5721567	no	yes
WBGene00018426	-0.0550441	0.0550441	0.74523	0.999353	0.0652706	-0.0652706	0.74265	0.999956	F44E7.4	178966	V	F44E7.4a	XLOC_030301	F44E7.4	chrV:5772981-5776925	no	yes
WBGene00018431	-0.0205804	0.0205804	0.910153	0.999353	-0.0179416	0.0179416	0.93515	0.999956	F44E7.9	185741	V	F44E7.9	XLOC_026858	F44E7.9	chrV:5791217-5791959	no	yes
WBGene00022576	0.044612	-0.044612	0.913441	0.999353	-0.0274303	0.0274303	0.94025	0.999956	ZC250.2	178968	V	ZC250.2	XLOC_026859	ZC250.2	chrV:5792313-5794764	no	yes
WBGene00002637	0.194244	-0.194244	0.348168	0.999353	-0.198908	0.198908	0.32245	0.999956	let-418	178970	V	F26F12.7	XLOC_026865	let-418	chrV:5826843-5832677	no	yes
WBGene00000713	-0.039101	0.039101	0.90558	0.999353	0.0177527	-0.0177527	942	0.999956	col-140	178971	V	F26F12.1	XLOC_030312	col-140	chrV:5835876-5836794	no	yes
WBGene00015677	0.0592939	-0.0592939	0.720717	0.999353	-0.0635531	0.0635531	746	0.999956	cpg-4	178986	V	C10F3.1	XLOC_026901	cpg-4	chrV:5996417-5999249	no	yes
WBGene00001345	-0.143238	0.143238	0.770494	0.999353	-0.199623	0.199623	0.60265	0.999956	fos-1	178987	V	F29G9.4a	XLOC_026902	fos-1	chrV:6008548-6015674	no	yes
WBGene00004502	-0.0132644	0.0132644	0.938667	0.999353	0.000346628	-0.000346628	0.9985	0.999956	rpt-2	178988	V	F29G9.5	XLOC_030342	rpt-2	chrV:6016182-6017651	no	yes
WBGene00000159	0.0730851	-0.0730851	0.671631	0.999353	-0.0899222	0.0899222	0.6741	0.999956	aps-1	178989	V	F29G9.3	XLOC_026904	aps-1	chrV:6017957-6018733	no	yes
WBGene00000980	0.0776807	-0.0776807	0.704472	0.999353	0.0776287	-0.0776287	0.76265	0.999956	dhs-17	178990	V		XLOC_030347	dhs-17	chrV:6026495-6034369	no	yes
WBGene00017930	-0.474312	0.474312	0.444774	0.999353	0.676312	-0.676312	1	1	F29G9.1	185122	V	F29G9.1	XLOC_026908	F29G9.1	chrV:6039480-6040301	no	yes
WBGene00000534	0.27732	-0.27732	0.170799	0.999353	-0.157538	0.157538	0.5486	0.999956	cpi-2	178992	V	R01B10.1a	XLOC_026910	cpi-2	chrV:6044086-6045522	no	yes
WBGene00019806	-0.384936	0.384936	0.0955307	0.999353	0.231749	-0.231749	0.3518	0.999956	R01B10.4	187504	V	R01B10.4	XLOC_030352	R01B10.4	chrV:6045821-6047891	no	yes
WBGene00019807	-0.0538593	0.0538593	0.848672	0.999353	0.0577458	-0.0577458	0.81875	0.999956	jamp-1	178993	V	R01B10.5	XLOC_030353	jamp-1	chrV:6048543-6051214	no	yes
WBGene00021392	0.00335366	-0.00335366	0.986953	0.999353	-0.0393462	0.0393462	0.85995	0.999956	Y38A10A.7	260224	V	Y38A10A.7	XLOC_026913	Y38A10A.7	chrV:6096010-6096886	no	yes
WBGene00021391	0.206276	-0.206276	0.244371	0.999353	-0.265737	0.265737	0.19855	0.999956	smut-1	178996	V	Y38A10A.6	XLOC_026914	smut-1	chrV:6097087-6098874	no	yes
WBGene00000802	-0.0951719	0.0951719	0.512703	0.999353	0.0871303	-0.0871303	0.6746	0.999956	crt-1	178997	V	Y38A10A.5	XLOC_030359	crt-1	chrV:6099154-6100492	no	yes
WBGene00004373	-0.133479	0.133479	0.59891	0.999353	0.125106	-0.125106	0.55025	0.999956	rme-1	179010	V	W06H8.1a	XLOC_026925	rme-1	chrV:6208867-6217242	no	yes
WBGene00019521	-0.273778	0.273778	0.275405	0.999353	0.196096	-0.196096	0.7199	0.999956	dmd-7	179012	V	K08B12.2a	XLOC_026933	dmd-7	chrV:6249578-6251712	no	yes
WBGene00006437	0.096544	-0.096544	0.695628	0.999353	-0.0766758	0.0766758	0.7095	0.999956	mrck-1	179013	V	K08B12.5a	XLOC_030380	mrck-1	chrV:6257908-6267174	no	yes
WBGene00019520	-0.484356	0.484356	0.496026	0.999353	0.151092	-0.151092	1	1	K08B12.1	179014	V	K08B12.1	XLOC_026935	K08B12.1	chrV:6257908-6267174	no	yes
WBGene00019666	0.0504859	-0.0504859	0.833052	0.999353	0.025776	-0.025776	0.91465	0.999956	sago-1	179016	V	K12B6.1	XLOC_026946	sago-1	chrV:6303781-6307918	no	yes
WBGene00019672	0.411541	-0.411541	0.147514	0.999353	-0.284389	0.284389	0.3169	0.999956	K12B6.8	NA	V		XLOC_030388	K12B6.8	chrV:6308793-6311984	no	yes
WBGene00020889	0.101611	-0.101611	0.842928	0.999353	-0.203678	0.203678	0.5593	0.999956	T28C12.2	179018	V	T28C12.2	XLOC_026951	T28C12.2	chrV:6329190-6330968	no	yes
WBGene00020273	0.0544506	-0.0544506	0.7674	0.999353	-0.103032	0.103032	0.62205	0.999956	T05H4.10	179023	V	T05H4.10	XLOC_030410	T05H4.10	chrV:6417558-6424138	no	yes
WBGene00020274	0.242081	-0.242081	0.179088	0.999353	-0.14708	0.14708	0.54185	0.999956	T05H4.11	179024	V	T05H4.11	XLOC_030411	T05H4.11	chrV:6424690-6425826	no	yes
WBGene00020275	-0.0357022	0.0357022	0.835487	0.999353	-0.0415769	0.0415769	0.84295	0.999956	atp-4	179025	V	T05H4.12	XLOC_030412	atp-4	chrV:6426378-6427093	no	yes
WBGene00000110	-0.19279	0.19279	0.396465	0.999353	0.138546	-0.138546	0.51155	0.999956	alh-4	179026	V	T05H4.13a	XLOC_030413	alh-4	chrV:6427292-6429895	no	yes
WBGene00001513	0.0277357	-0.0277357	0.865639	0.999353	-0.0460765	0.0460765	0.81965	0.999956	gad-1	179027	V	T05H4.14	XLOC_030414	gad-1	chrV:6431421-6433470	no	yes
WBGene00020269	0.128446	-0.128446	0.403411	0.999353	-0.146611	0.146611	0.45985	0.999956	erfa-1	179028	V	T05H4.6a	XLOC_026973	erfa-1	chrV:6434142-6436210	no	yes
WBGene00020268	-0.119125	0.119125	0.500011	0.999353	0.0952141	-0.0952141	0.6238	0.999956	hpo-19	179029	V	T05H4.5	XLOC_026974	hpo-19	chrV:6436629-6437766	no	yes
WBGene00020265	-0.160747	0.160747	0.679538	0.999353	0.228162	-0.228162	0.4699	0.999956	fbxa-196	188148	V	T05H4.2	XLOC_026977	fbxa-196	chrV:6448690-6450163	no	yes
WBGene00020264	0.0045348	-0.0045348	0.980464	0.999353	0.040108	-0.040108	0.8551	0.999956	acl-8	179031	V	T05H4.1	XLOC_026978	acl-8	chrV:6450880-6452214	no	yes
WBGene00022646	0.0846819	-0.0846819	0.592512	0.999353	-0.112304	0.112304	0.58965	0.999956	acl-9	179032	V	ZK40.1	XLOC_026979	acl-9	chrV:6453209-6454723	no	yes
WBGene00020911	0.214605	-0.214605	0.417191	0.999353	-0.192998	0.192998	0.4701	0.999956	cpt-6	179035	V	W01A11.5	XLOC_030429	cpt-6	chrV:6490192-6493904	no	yes
WBGene00020910	-0.0777618	0.0777618	0.634518	0.999353	0.0755967	-0.0755967	0.7084	0.999956	dgtr-1	189077	V	W01A11.2	XLOC_026988	dgtr-1	chrV:6497092-6498374	no	yes
WBGene00020909	0.10034	-0.10034	0.582536	0.999353	-0.0746442	0.0746442	0.73105	0.999956	W01A11.1	179036	V	W01A11.1a	XLOC_026989	W01A11.1	chrV:6499206-6502348	no	yes
WBGene00003385	0.1618	-0.1618	0.551419	0.999353	-0.265114	0.265114	0.3341	0.999956	moc-2	189078	V	W01A11.6	XLOC_030430	moc-2	chrV:6502423-6504122	no	yes
WBGene00006721	-0.0913088	0.0913088	0.682426	0.999353	0.0966266	-0.0966266	0.7058	0.999956	ubh-1	179039	V	F46E10.8	XLOC_030433	ubh-1	chrV:6510012-6511371	no	yes
WBGene00001073	-0.0675125	0.0675125	0.71743	0.999353	0.0716103	-0.0716103	0.7497	0.999956	dpy-11	179040	V	F46E10.9	XLOC_030434	dpy-11	chrV:6512064-6513328	no	yes
WBGene00018491	-0.0612787	0.0612787	0.776892	0.999353	0.0417938	-0.0417938	0.84245	0.999956	mdh-1	179041	V	F46E10.10a	XLOC_030435	mdh-1	chrV:6515402-6516508	no	yes
WBGene00018489	-0.0801423	0.0801423	0.889067	0.999353	0.500083	-0.500083	0.37745	0.999956	F46E10.2	179042	V	F46E10.2	XLOC_026992	F46E10.2	chrV:6520417-6520931	no	yes
WBGene00022843	0.021029	-0.021029	0.981663	0.999353	-0.183751	0.183751	1	1	ZK1055.2	191511	V	ZK1055.2	XLOC_027006	ZK1055.2	chrV:6590565-6593617	no	yes
WBGene00001829	0.216039	-0.216039	0.334839	0.999353	-0.215853	0.215853	0.28205	0.999956	hcp-1	179049	V	ZK1055.1	XLOC_027007	hcp-1	chrV:6594208-6598985	no	yes
WBGene00002148	0.153729	-0.153729	0.382337	0.999353	-0.123133	0.123133	0.5535	0.999956	gon-14	179052	V	F44C4.4a	XLOC_030457	gon-14	chrV:6606785-6611141	no	yes
WBGene00000784	-0.169247	0.169247	0.478599	0.999353	0.129069	-0.129069	0.5434	0.999956	cpr-4	179053	V	F44C4.3	XLOC_027008	cpr-4	chrV:6614745-6615751	no	yes
WBGene00044779	0.0236921	-0.0236921	0.97603	0.999353	0.12184	-0.12184	0.85605	0.999956	T10H9.8	4363099	V	T10H9.8	XLOC_027014	T10H9.8	chrV:6652436-6653628	no	yes
WBGene00004897	-0.0940977	0.0940977	0.657435	0.999353	0.38397	-0.38397	0.1522	0.974587	snb-1	266648	V	T10H9.4	XLOC_030463	snb-1	chrV:6655991-6656454	no	yes
WBGene00020947	0.472515	-0.472515	0.503636	0.999353	-0.00713997	0.00713997	0.9729	0.999956	W02F12.2	189124	V	W02F12.2	XLOC_030474	W02F12.2	chrV:6695412-6697634	no	yes
WBGene00020950	-0.0703068	0.0703068	0.724725	0.999353	0.079735	-0.079735	0.69205	0.999956	dlst-1	179063	V	W02F12.5	XLOC_030477	dlst-1	chrV:6707277-6709073	no	yes
WBGene00197363	-0.525685	0.525685	0.4861	0.999353	0.16013	-0.16013	0.40775	0.999956	W02F12.11	NA	V		XLOC_027026	W02F12.11	chrV:6709105-6709258	no	yes
WBGene00020951	0.171712	-0.171712	0.372237	0.999353	-0.362649	0.362649	0.1103	0.931285	sna-1	179064	V	W02F12.6	XLOC_030478	sna-1	chrV:6709678-6710468	no	yes
WBGene00004984	-0.136553	0.136553	0.489376	0.999353	0.123849	-0.123849	0.5431	0.999956	spn-4	179070	V	ZC404.8	XLOC_030495	spn-4	chrV:6783635-6784885	no	yes
WBGene00004975	0.0257738	-0.0257738	0.879114	0.999353	-0.172777	0.172777	0.69735	0.999956	spe-39	179071	V	ZC404.3a	XLOC_027036	spe-39	chrV:6785473-6787563	no	yes
WBGene00022603	-0.0532871	0.0532871	0.820402	0.999353	0.0358204	-0.0358204	0.8668	0.999956	gck-2	179072	V	ZC404.9	XLOC_030496	gck-2	chrV:6788871-6792643	no	yes
WBGene00006803	-0.249822	0.249822	0.31205	0.999353	0.243142	-0.243142	0.23335	0.999956	unc-70	179077	V	K11C4.3a	XLOC_027056	unc-70	chrV:6881371-6890319	no	yes
WBGene00017621	0.441186	-0.441186	0.266397	0.999353	-0.573953	0.573953	0.7116	0.999956	F20A1.10	184707	V	F20A1.10	XLOC_030555	F20A1.10	chrV:7038543-7095917	no	yes
WBGene00003164	0.249103	-0.249103	0.311071	0.999353	-0.292282	0.292282	0.6501	0.999956	mdt-6	179091	V	Y57E12AL.5	XLOC_030557	mdt-6	chrV:7038543-7095917	no	yes
WBGene00021959	0.0391455	-0.0391455	0.820324	0.999353	-0.0402488	0.0402488	0.96585	0.999956	Y57E12AL.6	179092	V	Y57E12AL.6	XLOC_030558	Y57E12AL.6	chrV:7038543-7095917	no	yes
WBGene00021956	-0.0658964	0.0658964	0.670345	0.999353	0.048284	-0.048284	0.8845	0.999956	Y57E12AL.1	179093	V	Y57E12AL.1a	XLOC_027081	Y57E12AL.1	chrV:7038543-7095917	no	yes
WBGene00021960	0.092729	-0.092729	0.639918	0.999353	-0.158415	0.158415	891	0.999956	Y57E12AM.1	179094	V	Y57E12AM.1	XLOC_027082	Y57E12AM.1	chrV:7038543-7095917	no	yes
WBGene00003786	-0.208352	0.208352	0.366377	0.999353	0.200524	-0.200524	0.8323	0.999956	npa-1	179095	V	VC5.3a	XLOC_027085	npa-1	chrV:7038543-7095917	no	yes
WBGene00017312	-0.382287	0.382287	0.460537	0.999353	0.601606	-0.601606	0.1452	0.964896	pitr-5	179104	V	F09G2.3	XLOC_027104	pitr-5	chrV:7185115-7188279	no	yes
WBGene00017316	0.136605	-0.136605	0.444233	0.999353	-0.125132	0.125132	0.53245	0.999956	F09G2.8	179105	V	F09G2.8a	XLOC_030588	F09G2.8	chrV:7188514-7193639	no	yes
WBGene00017317	0.160224	-0.160224	0.396644	0.999353	-0.246943	0.246943	217	0.999956	attf-2	179106	V	F09G2.9	XLOC_030589	attf-2	chrV:7194341-7196116	no	yes
WBGene00219888	-0.15859	0.15859	0.726849	0.999353	0.000705813	-0.000705813	0.98095	0.999956	F09G2.14	NA	V		XLOC_030590	F09G2.14	chrV:7196217-7196561	no	yes
WBGene00017311	-0.143867	0.143867	0.453094	0.999353	0.100132	-0.100132	0.6404	0.999956	F09G2.2	179107	V	F09G2.2	XLOC_027105	F09G2.2	chrV:7196896-7198229	no	yes
WBGene00017310	-0.296325	0.296325	0.503834	0.999353	0.248179	-0.248179	0.4222	0.999956	F09G2.1	179108	V	F09G2.1a	XLOC_027106	F09G2.1	chrV:7200239-7205488	no	yes
WBGene00015743	0.129036	-0.129036	0.533036	0.999353	-0.112906	0.112906	0.5721	0.999956	soap-1	179109	V	C13F10.4	XLOC_030591	soap-1	chrV:7205933-7214869	no	yes
WBGene00015744	-0.0192195	0.0192195	0.918602	0.999353	0.0501499	-0.0501499	0.8261	0.999956	C13F10.5	179110	V	C13F10.5	XLOC_030592	C13F10.5	chrV:7217658-7218971	no	yes
WBGene00015745	0.12257	-0.12257	0.46837	0.999353	-0.139975	0.139975	0.5046	0.999956	C13F10.6	182579	V	C13F10.6	XLOC_030593	C13F10.6	chrV:7219195-7220961	no	yes
WBGene00015746	-0.0287868	0.0287868	0.901545	0.999353	0.0600587	-0.0600587	0.7818	0.999956	C13F10.7	179111	V	C13F10.7	XLOC_030594	C13F10.7	chrV:7222317-7223234	no	yes
WBGene00015741	0.1849	-0.1849	0.793494	0.999353	-0.614724	0.614724	0.4291	0.999956	C13F10.1	24104204	V	C13F10.1a	XLOC_027108	C13F10.1	chrV:7224059-7224921	no	yes
WBGene00001428	-0.14531	0.14531	0.620918	0.999353	0.164729	-0.164729	0.54195	0.999956	fkb-3	179113	V	C05C8.3	XLOC_027109	fkb-3	chrV:7225350-7226211	no	yes
WBGene00015462	0.012954	-0.012954	0.940698	0.999353	-0.0106094	0.0106094	0.96165	0.999956	C05C8.5	179116	V	C05C8.5	XLOC_030597	C05C8.5	chrV:7232718-7234795	no	yes
WBGene00015463	0.0598691	-0.0598691	0.700201	0.999353	-0.0684334	0.0684334	0.7295	0.999956	hpo-9	179117	V	C05C8.6	XLOC_030598	hpo-9	chrV:7235000-7237108	no	yes
WBGene00015460	0.319122	-0.319122	0.124504	0.999353	-0.265916	0.265916	0.2802	0.999956	C05C8.1	179119	V	C05C8.1a	XLOC_027112	C05C8.1	chrV:7239752-7241278	no	yes
WBGene00017565	-0.144695	0.144695	0.611577	0.999353	0.172845	-0.172845	0.61105	0.999956	ddo-2	179130	V	F18E3.7a	XLOC_030633	ddo-2	chrV:7433461-7435007	no	yes
WBGene00017605	0.494542	-0.494542	0.0438464	0.992682	-0.446357	0.446357	34	0.709195	F19F10.9	179140	V	F19F10.9	XLOC_030660	F19F10.9	chrV:7572078-7575605	no	yes
WBGene00017608	0.200492	-0.200492	0.232394	0.999353	-0.24	0.24	0.42335	0.999956	F19F10.12	179142	V	F19F10.12	XLOC_027173	F19F10.12	chrV:7575819-7581446	no	yes
WBGene00017606	0.0717194	-0.0717194	0.725338	0.999353	-0.0764103	0.0764103	0.79785	0.999956	ets-6	179141	V	F19F10.10	XLOC_030661	ets-6	chrV:7575819-7581446	no	yes
WBGene00017607	0.1694	-0.1694	0.324203	0.999353	-0.12747	0.12747	548	0.999956	F19F10.11	179143	V	F19F10.11a	XLOC_030662	F19F10.11	chrV:7581593-7587579	no	yes
WBGene00020246	0.153774	-0.153774	0.445502	0.999353	-0.106045	0.106045	0.9412	0.999956	clic-1	179150	V	T05B11.3	XLOC_030691	clic-1	chrV:7731614-8569933	no	yes
WBGene00001719	-0.0672589	0.0672589	0.827835	0.999353	0.0973333	-0.0973333	0.9407	0.999956	grl-10	179152	V	C26F1.5	XLOC_027207	grl-10	chrV:7731614-8569933	no	yes
WBGene00004453	0.105728	-0.105728	0.622827	0.999353	-0.322753	0.322753	0.87005	0.999956	rpl-39	179153	V	C26F1.9	XLOC_030696	rpl-39	chrV:7731614-8569933	no	yes
WBGene00004499	-0.0012141	0.0012141	0.993854	0.999353	-0.082473	0.082473	0.91845	0.999956	rps-30	179154	V	C26F1.4	XLOC_027209	rps-30	chrV:7731614-8569933	no	yes
WBGene00016148	0.314309	-0.314309	0.188561	0.999353	-0.384692	0.384692	0.81175	0.999956	C26F1.3	179155	V	C26F1.3	XLOC_027210	C26F1.3	chrV:7731614-8569933	no	yes
WBGene00002078	-0.0350274	0.0350274	0.889127	0.999353	0.0419278	-0.0419278	0.96365	0.999956	xpo-1	179160	V	ZK742.1a	XLOC_027216	xpo-1	chrV:7731614-8569933	no	yes
WBGene00022813	0.155987	-0.155987	0.681272	0.999353	-0.114764	0.114764	0.9324	0.999956	ZK742.3	191419	V	ZK742.3	XLOC_030700	ZK742.3	chrV:7731614-8569933	no	yes
WBGene00022814	-0.213001	0.213001	0.629493	0.999353	0.364775	-0.364775	0.7913	0.999956	ZK742.4	179159	V	ZK742.4	XLOC_030701	ZK742.4	chrV:7731614-8569933	no	yes
WBGene00002256	-0.354185	0.354185	0.04876	0.999353	0.312039	-0.312039	0.86265	0.999956	lbp-4	179161	V	ZK742.5	XLOC_027217	lbp-4	chrV:7731614-8569933	no	yes
WBGene00016501	0.168685	-0.168685	0.345461	0.999353	-0.11377	0.11377	0.9466	0.999956	C37C3.9	179164	V	C37C3.9	XLOC_030708	C37C3.9	chrV:7731614-8569933	no	yes
WBGene00219659	0.114943	-0.114943	0.811028	0.999353	-0.487031	0.487031	0.70195	0.999956	anr-36	NA	V		XLOC_030709	anr-36	chrV:7731614-8569933	no	yes
WBGene00016496	0.0180537	-0.0180537	0.909225	0.999353	0.00324601	-0.00324601	0.9984	0.999956	C37C3.2	179165	V	C37C3.2	XLOC_027222	C37C3.2	chrV:7731614-8569933	no	yes
WBGene00016495	0.220847	-0.220847	0.236641	0.999353	-0.292467	0.292467	0.8048	0.999956	C37C3.1	179166	V	C37C3.1a	XLOC_027223	C37C3.1	chrV:7731614-8569933	no	yes
WBGene00018218	0.0687733	-0.0687733	0.713216	0.999353	-0.102467	0.102467	0.91185	0.999956	F40A3.3	179168	V	F40A3.3a	XLOC_027225	F40A3.3	chrV:7731614-8569933	no	yes
WBGene00018217	-0.319916	0.319916	0.321053	0.999353	0.264146	-0.264146	0.8476	0.999956	F40A3.2	179169	V	F40A3.2	XLOC_027226	F40A3.2	chrV:7731614-8569933	no	yes
WBGene00017818	0.254312	-0.254312	0.451747	0.999353	-0.168659	0.168659	0.8996	0.999956	F26D11.1	36805006	V	F26D11.1	XLOC_027237	F26D11.1	chrV:7731614-8569933	no	yes
WBGene00022396	0.394466	-0.394466	0.481123	0.999353	-0.306484	0.306484	1	1	Y97E10AR.1	179174	V	Y97E10AR.1	XLOC_027241	Y97E10AR.1	chrV:7731614-8569933	no	yes
WBGene00022398	0.237535	-0.237535	0.199219	0.999353	-0.211027	0.211027	0.88945	0.999956	Y97E10AR.3	179175	V	Y97E10AR.3	XLOC_030741	Y97E10AR.3	chrV:7731614-8569933	no	yes
WBGene00022399	0.0445257	-0.0445257	0.799324	0.999353	-0.0487073	0.0487073	0.9532	0.999956	Y97E10AR.4	179176	V	Y97E10AR.4	XLOC_030742	Y97E10AR.4	chrV:7731614-8569933	no	yes
WBGene00022400	0.0270705	-0.0270705	0.891934	0.999353	0.0374778	-0.0374778	0.97865	0.999956	rpb-9	179178	V	Y97E10AR.5	XLOC_030744	rpb-9	chrV:7731614-8569933	no	yes
WBGene00022401	0.206896	-0.206896	0.307969	0.999353	-0.193205	0.193205	0.9216	0.999956	Y97E10AR.6	179179	V	Y97E10AR.6	XLOC_030745	Y97E10AR.6	chrV:7731614-8569933	no	yes
WBGene00018398	-0.51804	0.51804	0.0521664	0.999353	0.514826	-0.514826	0.69135	0.999956	sptl-2	266646	V	F43H9.2a	XLOC_027243	sptl-2	chrV:7731614-8569933	no	yes
WBGene00018399	0.267334	-0.267334	0.258858	0.999353	-0.358902	0.358902	0.78925	0.999956	F43H9.3	179181	V	F43H9.3	XLOC_030746	F43H9.3	chrV:7731614-8569933	no	yes
WBGene00018400	0.0127808	-0.0127808	0.978315	0.999353	-0.11557	0.11557	0.93715	0.999956	F43H9.4	179182	V	F43H9.4	XLOC_027245	F43H9.4	chrV:7731614-8569933	no	yes
WBGene00003865	-0.0801992	0.0801992	0.677465	0.999353	0.0782952	-0.0782952	0.96245	0.999956	oma-2	179183	V	ZC513.6	XLOC_027246	oma-2	chrV:7731614-8569933	no	yes
WBGene00006935	0.250664	-0.250664	0.151324	0.999353	-0.283061	0.283061	0.8674	0.999956	vars-1	179184	V	ZC513.4	XLOC_027247	vars-1	chrV:7731614-8569933	no	yes
WBGene00194928	-0.0536021	0.0536021	0.898675	0.999353	0.214471	-0.214471	0.86935	0.999956	ZC513.14	13213873	V	ZC513.14	XLOC_030748	ZC513.14	chrV:7731614-8569933	no	yes
WBGene00005006	0.365207	-0.365207	0.0853164	0.999353	-0.40669	0.40669	0.81225	0.999956	spr-1	179192	V	D1014.8	XLOC_030763	spr-1	chrV:7731614-8569933	no	yes
WBGene00017016	0.016524	-0.016524	0.932182	0.999353	-0.0311774	0.0311774	0.9853	0.999956	snap-1	179193	V	D1014.3	XLOC_027266	snap-1	chrV:7731614-8569933	no	yes
WBGene00017017	-0.108997	0.108997	0.652152	0.999353	0.0758499	-0.0758499	0.96095	0.999956	D1014.4	183896	V	D1014.4	XLOC_027267	D1014.4	chrV:7731614-8569933	no	yes
WBGene00017015	0.219079	-0.219079	0.731228	0.999353	-0.096294	0.096294	0.94115	0.999956	D1014.2	183895	V	D1014.2	XLOC_027269	D1014.2	chrV:7731614-8569933	no	yes
WBGene00019480	-0.16384	0.16384	0.668823	0.999353	0.276949	-0.276949	0.83215	0.999956	K07C11.8	187106	V	K07C11.8	XLOC_030774	K07C11.8	chrV:7731614-8569933	no	yes
WBGene00019481	0.144632	-0.144632	0.401815	0.999353	-0.154797	0.154797	0.9396	0.999956	cogc-6	179201	V	K07C11.9	XLOC_030775	cogc-6	chrV:7731614-8569933	no	yes
WBGene00000098	0.0737398	-0.0737398	0.739824	0.999353	-0.031914	0.031914	0.98455	0.999956	air-1	179202	V	K07C11.2	XLOC_027282	air-1	chrV:7731614-8569933	no	yes
WBGene00044955	-0.0892374	0.0892374	0.839176	0.999353	0.0547262	-0.0547262	0.9721	0.999956	K07C11.11	NA	V		XLOC_027283	K07C11.11	chrV:7731614-8569933	no	yes
WBGene00004395	0.0525512	-0.0525512	0.846735	0.999353	0.0388314	-0.0388314	1	1	rol-3	179204	V	C16D9.2	XLOC_030777	rol-3	chrV:7731614-8569933	no	yes
WBGene00015859	-1.04769	1.04769	0.185633	0.999353	0.841383	-0.841383	1	1	C16D9.4	179206	V	C16D9.4	XLOC_030780	C16D9.4	chrV:7731614-8569933	no	yes
WBGene00022932	0.373528	-0.373528	0.55617	0.999353	0	0	1	1	C16D9.10	NA	V		XLOC_030783	C16D9.10	chrV:7731614-8569933	no	yes
WBGene00015861	0.752244	-0.752244	0.164171	0.999353	-0.67286	0.67286	0.6297	0.999956	C16D9.6	182687	V	C16D9.6	XLOC_030784	C16D9.6	chrV:7731614-8569933	no	yes
WBGene00020940	0.0902685	-0.0902685	0.796076	0.999353	-0.134037	0.134037	0.9186	0.999956	W02D7.4	189116	V	W02D7.4	XLOC_030794	W02D7.4	chrV:7731614-8569933	no	yes
WBGene00020942	0.127558	-0.127558	0.570218	0.999353	-0.165961	0.165961	0.9054	0.999956	W02D7.6	179212	V	W02D7.6	XLOC_030796	W02D7.6	chrV:7731614-8569933	no	yes
WBGene00004766	0.0574383	-0.0574383	0.713651	0.999353	-0.0857343	0.0857343	0.9616	0.999956	sel-9	179213	V	W02D7.7	XLOC_030797	sel-9	chrV:7731614-8569933	no	yes
WBGene00003395	-0.126057	0.126057	0.4146	0.999353	0.079298	-0.079298	0.9638	0.999956	mom-2	179217	V	F38E1.7	XLOC_027304	mom-2	chrV:7731614-8569933	no	yes
WBGene00018698	0.137381	-0.137381	0.37039	0.999353	-0.163496	0.163496	0.92745	0.999956	vha-18	179223	V	F52E1.10	XLOC_030810	vha-18	chrV:7731614-8569933	no	yes
WBGene00004078	-0.0792794	0.0792794	0.703468	0.999353	0.061408	-0.061408	0.94085	0.999956	pos-1	179224	V	F52E1.1	XLOC_027314	pos-1	chrV:7731614-8569933	no	yes
WBGene00018700	-0.0203502	0.0203502	0.931161	0.999353	-0.0108802	0.0108802	0.9899	0.999956	lmd-3	179225	V	F52E1.13a	XLOC_030811	lmd-3	chrV:7731614-8569933	no	yes
WBGene00020721	0.051375	-0.051375	0.793239	0.999353	-0.050419	0.050419	0.9725	0.999956	T23B12.6	179226	V	T23B12.6	XLOC_030815	T23B12.6	chrV:7731614-8569933	no	yes
WBGene00001040	0.336249	-0.336249	0.258447	0.999353	-0.379286	0.379286	0.8162	0.999956	dnj-22	179227	V	T23B12.7	XLOC_030816	dnj-22	chrV:7731614-8569933	no	yes
WBGene00020718	-0.252837	0.252837	0.108131	0.999353	0.19548	-0.19548	0.91075	0.999956	mrps-2	179229	V	T23B12.3	XLOC_027319	mrps-2	chrV:7731614-8569933	no	yes
WBGene00020717	-0.0899112	0.0899112	0.592041	0.999353	0.0759877	-0.0759877	0.96285	0.999956	mrpl-4	179230	V	T23B12.2	XLOC_027321	mrpl-4	chrV:7731614-8569933	no	yes
WBGene00020716	0.196056	-0.196056	0.387281	0.999353	-0.171836	0.171836	0.90455	0.999956	phf-30	188776	V	T23B12.1	XLOC_027322	phf-30	chrV:7731614-8569933	no	yes
WBGene00004256	-0.405057	0.405057	0.0868402	0.999353	0.39454	-0.39454	0.75925	0.999956	pxn-1	191484	V	ZK994.3	XLOC_027323	pxn-1	chrV:7731614-8569933	no	yes
WBGene00018481	-0.118887	0.118887	0.548805	0.999353	0.00386196	-0.00386196	0.9974	0.999956	F45F2.9	185809	V	F45F2.9a	XLOC_030822	F45F2.9	chrV:7731614-8569933	no	yes
WBGene00018482	0.13766	-0.13766	0.487594	0.999353	-0.0854687	0.0854687	0.9601	0.999956	F45F2.10	179231	V	F45F2.10	XLOC_030823	F45F2.10	chrV:7731614-8569933	no	yes
WBGene00018483	0.240656	-0.240656	0.274975	0.999353	-0.338459	0.338459	0.7927	0.999956	F45F2.11	185810	V	F45F2.11a	XLOC_030824	F45F2.11	chrV:7731614-8569933	no	yes
WBGene00001882	0.188763	-0.188763	0.374545	0.999353	-0.293102	0.293102	0.82975	0.999956	his-8	191670	V	F45F2.12	XLOC_030827	his-8	chrV:7731614-8569933	no	yes
WBGene00001881	0.30831	-0.30831	0.211354	0.999353	-0.249602	0.249602	0.89105	0.999956	his-7	191669	V	F45F2.4	XLOC_027332	his-7	chrV:7731614-8569933	no	yes
WBGene00000055	0.229666	-0.229666	0.635728	0.999353	0.0173756	-0.0173756	0.98805	0.999956	acr-16	179235	V	F25G6.3	XLOC_027344	acr-16	chrV:7731614-8569933	no	yes
WBGene00017799	-0.113521	0.113521	0.623713	0.999353	0.134069	-0.134069	0.9276	0.999956	F25G6.8	179236	V	F25G6.8	XLOC_030835	F25G6.8	chrV:7731614-8569933	no	yes
WBGene00017800	0.2671	-0.2671	0.118293	0.999353	-0.198899	0.198899	0.8959	0.999956	F25G6.9	179237	V	F25G6.9	XLOC_030766	F25G6.9	chrV:7731614-8569933	no	yes
WBGene00017797	0.219282	-0.219282	0.280136	0.999353	-0.247258	0.247258	0.2358	0.999956	symk-1	182490	V	F25G6.2	XLOC_027345	symk-1	chrV:8570288-8581199	no	yes
WBGene00044554	0.0989283	-0.0989283	0.91824	0.999353	-0.0980574	0.0980574	0.79655	0.999956	F41E6.15	3896827	V	F41E6.15	XLOC_030841	F41E6.15	chrV:8602162-8602714	no	yes
WBGene00018286	-0.0900439	0.0900439	0.83523	0.999353	0.0671282	-0.0671282	0.8496	0.999956	F41E6.5	179241	V	F41E6.5a	XLOC_027349	F41E6.5	chrV:8603572-8605058	no	yes
WBGene00018290	0.152302	-0.152302	0.426439	0.999353	-0.185625	0.185625	0.3568	0.999956	vps-60	179242	V	F41E6.9	XLOC_030842	vps-60	chrV:8605233-8606103	no	yes
WBGene00018285	0.149719	-0.149719	0.442164	0.999353	-0.220217	0.220217	0.3291	0.999956	smk-1	179243	V	F41E6.4a	XLOC_027350	smk-1	chrV:8607779-8615057	no	yes
WBGene00001694	0.214762	-0.214762	0.44973	0.999353	-0.238231	0.238231	0.38055	0.999956	grd-5	179244	V	F41E6.2	XLOC_027352	grd-5	chrV:8619027-8619651	no	yes
WBGene00001526	0.0950221	-0.0950221	0.701079	0.999353	-0.0593945	0.0593945	0.79055	0.999956	gck-1	179274	V	T19A5.2a	XLOC_027422	gck-1	chrV:8947788-8955392	no	yes
WBGene00020864	-0.096592	0.096592	0.868891	0.999353	0.150715	-0.150715	1	1	oac-50	179284	V	T27E4.6a	XLOC_030928	oac-50	chrV:9069880-9073606	no	yes
WBGene00020865	-1.04849	1.04849	0.15307	0.999353	2.19014	-2.19014	0.24855	0.999956	T27E4.7	179285	V	T27E4.7	XLOC_030929	T27E4.7	chrV:9075067-9076257	no	yes
WBGene00194993	0.668995	-0.668995	0.590936	0.999353	0.589219	-0.589219	0.74705	0.999956	T27E4.11	NA	V		XLOC_030932	T27E4.11	chrV:9086835-9086999	no	yes
WBGene00044923	0.646553	-0.646553	0.656367	0.999353	0	0	1	1	T27E4.10	NA	V		XLOC_027451	T27E4.10	chrV:9090853-9091017	no	yes
WBGene00017659	0.237984	-0.237984	0.394969	0.999353	-0.261935	0.261935	318	0.999956	F21C10.10	179290	V	F21C10.10	XLOC_027454	F21C10.10	chrV:9096247-9097106	no	yes
WBGene00015057	-0.393093	0.393093	0.438708	0.999353	0.412094	-0.412094	0.2012	0.999956	gad-3	24104108	V	B0222.9	XLOC_030953	gad-3	chrV:9168420-9172978	no	yes
WBGene00016045	0.103459	-0.103459	0.508071	0.999353	-0.252934	0.252934	0.32325	0.999956	spas-1	179300	V	C24B5.2a	XLOC_027471	spas-1	chrV:9175779-9177809	no	yes
WBGene00007023	0.246269	-0.246269	0.280121	0.999353	-0.265457	0.265457	0.2288	0.999956	mdt-27	179303	V	T18H9.6	XLOC_030958	mdt-27	chrV:9209680-9213628	no	yes
WBGene00044077	0.071048	-0.071048	0.729671	0.999353	-0.0500122	0.0500122	0.8152	0.999956	tag-232	179304	V	T18H9.7a	XLOC_030959	tag-232	chrV:9214110-9217155	no	yes
WBGene00006499	-0.065628	0.065628	0.740679	0.999353	0.101758	-0.101758	617	0.999956	tag-153	179312	V	F44A2.1a	XLOC_027492	tag-153	chrV:9323359-9326700	no	yes
WBGene00019465	0.165214	-0.165214	0.292363	0.999353	-0.189556	0.189556	0.44595	0.999956	acl-14	179313	V	K07B1.5	XLOC_030980	acl-14	chrV:9327410-9333003	no	yes
WBGene00019464	0.112711	-0.112711	0.645729	0.999353	-0.07653	0.07653	0.86555	0.999956	K07B1.4	179314	V	K07B1.4a	XLOC_027493	K07B1.4	chrV:9327410-9333003	no	yes
WBGene00006729	-0.10291	0.10291	0.567146	0.999353	0.0628594	-0.0628594	0.78265	0.999956	ucp-4	179315	V	K07B1.3	XLOC_027494	ucp-4	chrV:9334748-9336340	no	yes
WBGene00000766	-0.0692122	0.0692122	0.680706	0.999353	0.0638836	-0.0638836	0.7634	0.999956	coq-6	179316	V	K07B1.2	XLOC_027495	coq-6	chrV:9336737-9338819	no	yes
WBGene00019466	0.139438	-0.139438	0.419079	0.999353	-0.101376	0.101376	0.63675	0.999956	tos-1	3565833	V	K07B1.6a	XLOC_030983	tos-1	chrV:9343354-9344105	no	yes
WBGene00002036	0.0951483	-0.0951483	0.612725	0.999353	-0.10175	0.10175	0.61025	0.999956	hum-2	179321	V	F36D4.3a	XLOC_027503	hum-2	chrV:9386129-9399686	no	yes
WBGene00018088	-0.237089	0.237089	0.300103	0.999353	0.215246	-0.215246	0.3312	0.999956	trpp-4	185357	V	F36D4.2	XLOC_027504	trpp-4	chrV:9400309-9401736	no	yes
WBGene00018087	0.00358428	-0.00358428	0.995087	0.999467	-0.16926	0.16926	0.6854	0.999956	F36D4.1	179323	V	F36D4.1	XLOC_027507	F36D4.1	chrV:9417031-9419232	no	yes
WBGene00018090	0.00242909	-0.00242909	0.990029	0.999353	0.0147776	-0.0147776	0.94675	0.999956	F36D4.5	179324	V	F36D4.5a	XLOC_030997	F36D4.5	chrV:9420366-9421478	no	yes
[truncated: 9,312 more rows]
